# Supplementary material for: Comparative genetic screens in human cells reveal new regulatory mechanisms in WNT signaling
Source: eLife journal article supplement (doi:10.7554/elife.21459), 2016-12-20
Supplement: supp [file elife_poa_e21459_Supplementary_File_1.xlsx]

## Sheet: WNT negative reg.
	Unsorted cells	Sorted cells					Derived from columns B and C		Derived from columns F and G
	All GT insertions in genes	Inactivating GT insertions in genes	Sense GT insetions in exons	Antisense GT insetions in exons	Sense GT insetions in introns	Antisense GT insetions in introns	p-value	FDR-corrected p-value	IGTIOB score
Total for dataset:	208561	2618	262	250	2106	920
Gene
CSNK1A1	24	144	23	20	101	2	7.02302e-245	1.29575e-241	29.1185
APC	21	29	1	2	26	1	3.1207e-42	2.87884e-39	14.9782
PYY	4	4	0	0	4	0	1.59468e-06	0.00098073	3.737
CEP72	1	2	0	0	2	0	0.000457764	0.168915	1.74126
ZNF33A	1	2	0	0	2	0	0.000457764	0.168915	1.74126
MFGE8	2	2	0	0	2	0	0.000907962	0.239313	1.74126
TWIST1	2	2	1	1	0	0	0.000907962	0.239313	0
C19orf39	14	3	2	1	0	1	0.00113973	0.26285	-0.693147
ZMYND12	3	2	0	2	0	0	0.00150077	0.294146	0
CIRBP	16	3	0	0	3	0	0.00159429	0.294146	2.77259
C5orf30	4	2	1	0	1	0	0.00223259	0.294224	0.693147
LOC25845	4	2	1	0	1	0	0.00223259	0.294224	0.693147
POLR1D	4	2	0	1	1	0	0.00223259	0.294224	0.693147
TRAPPC2L	4	2	0	0	2	0	0.00223259	0.294224	1.74126
FAM109B	19	3	3	0	0	0	0.00246438	0.301015	0
BCKDHA	5	2	0	0	2	0	0.00309988	0.301015	1.74126
C16orf5	5	2	0	0	2	0	0.00309988	0.301015	1.74126
ITPRIPL2	5	2	0	2	0	0	0.00309988	0.301015	0
PRL	5	2	0	0	2	1	0.00309988	0.301015	1.04811
IFI6	6	2	0	0	2	0	0.00409915	0.310044	1.74126
PEX26	6	2	1	0	1	0	0.00409915	0.310044	0.693147
NARS2	199	8	0	0	8	0	0.00467483	0.310044	6.96504
NELL2	53	4	0	0	4	0	0.00555	0.310044	3.737
ADK	256	9	0	0	9	4	0.00640969	0.310044	3.91202
EML4	8	2	1	0	1	0	0.0064801	0.310044	0.693147
PDE1A	8	2	0	0	2	1	0.0064801	0.310044	1.04811
PPIA	8	2	0	0	2	0	0.0064801	0.310044	1.74126
FAM190A	89	5	0	0	5	0	0.0064859	0.310044	4.63163
DPYSL2	28	3	1	0	2	0	0.00662055	0.310044	1.74126
PARP1	29	3	0	0	3	1	0.00723864	0.310044	2.07944
BTBD19	9	2	1	1	0	0	0.00785514	0.310044	0
CAPN8	9	2	0	0	2	0	0.00785514	0.310044	1.74126
FGD6	9	2	0	0	2	0	0.00785514	0.310044	1.74126
MLXIP	9	2	1	0	1	1	0.00785514	0.310044	0
PLTP	9	2	0	0	2	1	0.00785514	0.310044	1.04811
TACR1	9	2	0	0	2	1	0.00785514	0.310044	1.04811
UBXN2A	9	2	0	0	2	0	0.00785514	0.310044	1.74126
UIMC1	9	2	0	0	2	1	0.00785514	0.310044	1.04811
ADD1	30	3	0	0	3	1	0.00788976	0.310044	2.07944
LOC647946	59	4	0	0	4	1	0.00789431	0.310044	3.04385
C12orf57	10	2	0	0	2	0	0.00934891	0.310044	1.74126
EP400NL	10	2	0	0	2	1	0.00934891	0.310044	1.04811
LONRF1	10	2	0	0	2	0	0.00934891	0.310044	1.74126
ITGB5	33	3	0	0	3	1	0.0100449	0.310044	2.07944
BRI3BP	11	2	1	1	0	0	0.0109583	0.310044	0
FXYD5	11	2	1	0	1	0	0.0109583	0.310044	0.693147
ADAMTS4	0	1	0	1	0	0	0.0124017	0.310044	0
ADM	0	1	0	1	0	0	0.0124017	0.310044	0
APOBEC3F	0	1	0	1	0	0	0.0124017	0.310044	0
C14orf48	0	1	0	0	1	0	0.0124017	0.310044	0.693147
C4orf46	0	1	0	0	1	0	0.0124017	0.310044	0.693147
CCL26	0	1	0	0	1	0	0.0124017	0.310044	0.693147
CD74	0	1	0	0	1	0	0.0124017	0.310044	0.693147
DDTL	0	1	0	0	1	0	0.0124017	0.310044	0.693147
F9	0	1	0	0	1	0	0.0124017	0.310044	0.693147
FAM160B2	0	1	0	0	1	0	0.0124017	0.310044	0.693147
FBLN2	0	1	0	1	0	0	0.0124017	0.310044	0
ISLR	0	1	1	0	0	0	0.0124017	0.310044	0
IZUMO1	0	1	0	1	0	0	0.0124017	0.310044	0
JPH3	0	1	0	0	1	0	0.0124017	0.310044	0.693147
LDHAL6A	0	1	0	0	1	0	0.0124017	0.310044	0.693147
MEFV	0	1	0	0	1	0	0.0124017	0.310044	0.693147
MYCBP	0	1	0	0	1	0	0.0124017	0.310044	0.693147
NRGN	0	1	0	0	1	0	0.0124017	0.310044	0.693147
POU3F3	0	1	1	0	0	0	0.0124017	0.310044	0
SERPINE2	0	1	0	0	1	0	0.0124017	0.310044	0.693147
SLC38A2	0	1	0	0	1	0	0.0124017	0.310044	0.693147
TMEM45B	0	1	0	0	1	0	0.0124017	0.310044	0.693147
YTHDF1	0	1	0	0	1	0	0.0124017	0.310044	0.693147
ZNF528	0	1	0	0	1	0	0.0124017	0.310044	0.693147
PPPDE2	12	2	0	0	2	1	0.0126801	0.310044	1.04811
FASTKD2	13	2	0	1	1	0	0.0145113	0.310044	0.693147
FLJ39582	13	2	0	2	0	0	0.0145113	0.310044	0
GCNT1	13	2	0	0	2	1	0.0145113	0.310044	1.04811
INCA1	13	2	0	2	0	0	0.0145113	0.310044	0
SFRS11	13	2	0	0	2	1	0.0145113	0.310044	1.04811
ACSM1	14	2	0	0	2	0	0.0164491	0.310044	1.74126
CAMK1D	14	2	0	0	2	0	0.0164491	0.310044	1.74126
KIAA1908	14	2	0	1	1	0	0.0164491	0.310044	0.693147
MLST8	14	2	0	1	1	0	0.0164491	0.310044	0.693147
ANK3	75	4	0	0	4	1	0.0170543	0.310044	3.04385
MIR548N	116	5	0	0	5	0	0.0179072	0.310044	4.63163
C19orf23	15	2	0	2	0	0	0.0184903	0.310044	0
COX5A	15	2	1	0	1	1	0.0184903	0.310044	0
HES7	15	2	0	0	2	0	0.0184903	0.310044	1.74126
KISS1R	15	2	1	0	1	1	0.0184903	0.310044	0
TMEM102	15	2	0	1	1	0	0.0184903	0.310044	0.693147
FBXO31	43	3	0	0	3	1	0.0194935	0.310044	2.07944
DCAF6	16	2	1	0	1	0	0.0206322	0.310044	0.693147
HBQ1	16	2	2	0	0	0	0.0206322	0.310044	0
ITGAE	16	2	0	0	2	0	0.0206322	0.310044	1.74126
PTRH2	16	2	0	0	2	0	0.0206322	0.310044	1.74126
BRE	44	3	0	0	3	1	0.0206342	0.310044	2.07944
LOC338799	168	6	1	2	3	0	0.0222168	0.310044	2.77259
APCDD1L	123	5	0	0	5	3	0.0222236	0.310044	1.85904
DNAJC2	17	2	1	0	1	0	0.022872	0.310044	0.693147
YWHAZ	17	2	0	1	1	0	0.022872	0.310044	0.693147
ZNF689	17	2	0	1	1	0	0.022872	0.310044	0.693147
BGN	1	1	0	0	1	0	0.0246496	0.310044	0.693147
C20orf103	1	1	1	0	0	0	0.0246496	0.310044	0
CACNA1H	1	1	0	0	1	0	0.0246496	0.310044	0.693147
CATSPER3	1	1	0	0	1	0	0.0246496	0.310044	0.693147
CCNG2	1	1	1	0	0	0	0.0246496	0.310044	0
CD82	1	1	0	0	1	0	0.0246496	0.310044	0.693147
CITED2	1	1	1	0	0	0	0.0246496	0.310044	0
COMMD5	1	1	0	0	1	0	0.0246496	0.310044	0.693147
CORO1B	1	1	1	0	0	0	0.0246496	0.310044	0
DEXI	1	1	0	0	1	0	0.0246496	0.310044	0.693147
DUSP1	1	1	0	0	1	0	0.0246496	0.310044	0.693147
ENDOG	1	1	1	0	0	0	0.0246496	0.310044	0
FAM83E	1	1	0	0	1	0	0.0246496	0.310044	0.693147
FAM98C	1	1	0	0	1	0	0.0246496	0.310044	0.693147
HRC	1	1	0	0	1	0	0.0246496	0.310044	0.693147
IGBP1	1	1	0	0	1	0	0.0246496	0.310044	0.693147
IGLON5	1	1	0	0	1	0	0.0246496	0.310044	0.693147
JHDM1D	1	1	0	0	1	0	0.0246496	0.310044	0.693147
KIAA0284	1	1	0	0	1	0	0.0246496	0.310044	0.693147
KIAA0319	1	1	0	0	1	0	0.0246496	0.310044	0.693147
KNDC1	1	1	1	0	0	0	0.0246496	0.310044	0
LIPC	1	1	0	0	1	0	0.0246496	0.310044	0.693147
LOC100287227	1	1	1	0	0	0	0.0246496	0.310044	0
LPO	1	1	0	0	1	0	0.0246496	0.310044	0.693147
MED6	1	1	0	0	1	0	0.0246496	0.310044	0.693147
NCKAP1L	1	1	0	0	1	0	0.0246496	0.310044	0.693147
NKX2-3	1	1	0	1	0	0	0.0246496	0.310044	0
NPEPPS	1	1	1	0	0	1	0.0246496	0.310044	-0.693147
PDIA6	1	1	1	0	0	0	0.0246496	0.310044	0
RFK	1	1	0	0	1	0	0.0246496	0.310044	0.693147
RGS13	1	1	0	0	1	0	0.0246496	0.310044	0.693147
RPS6KA3	1	1	0	0	1	1	0.0246496	0.310044	0
S100A13	1	1	0	0	1	0	0.0246496	0.310044	0.693147
S100A3	1	1	1	0	0	0	0.0246496	0.310044	0
SFRS13B	1	1	0	0	1	0	0.0246496	0.310044	0.693147
SFXN3	1	1	0	0	1	0	0.0246496	0.310044	0.693147
SHCBP1	1	1	0	0	1	0	0.0246496	0.310044	0.693147
SNAP23	1	1	0	0	1	0	0.0246496	0.310044	0.693147
SPATS1	1	1	0	0	1	0	0.0246496	0.310044	0.693147
STAB1	1	1	1	0	0	0	0.0246496	0.310044	0
TBCB	1	1	0	1	0	0	0.0246496	0.310044	0
TBRG1	1	1	0	0	1	0	0.0246496	0.310044	0.693147
TPR	1	1	0	0	1	0	0.0246496	0.310044	0.693147
TSGA10IP	1	1	0	0	1	0	0.0246496	0.310044	0.693147
UCHL3	1	1	0	0	1	0	0.0246496	0.310044	0.693147
VCPIP1	1	1	0	1	0	0	0.0246496	0.310044	0
ABCC2	18	2	0	0	2	0	0.0252068	0.310044	1.74126
CDKN1B	18	2	1	0	1	0	0.0252068	0.310044	0.693147
HEXIM1	18	2	1	1	0	0	0.0252068	0.310044	0
MC1R	18	2	1	1	0	0	0.0252068	0.310044	0
RP1-177G6.2	18	2	0	1	1	1	0.0252068	0.310044	0
SLC37A3	18	2	0	0	2	0	0.0252068	0.310044	1.74126
DNAJC5	19	2	0	1	1	0	0.027634	0.324316	0.693147
HIPK3	19	2	0	0	2	0	0.027634	0.324316	1.74126
SLC16A9	19	2	1	0	1	0	0.027634	0.324316	0.693147
ZC3H7B	19	2	0	0	2	0	0.027634	0.324316	1.74126
DCLK2	50	3	0	1	2	1	0.028232	0.324316	1.04811
CHST7	20	2	0	0	2	0	0.030151	0.324316	1.74126
CUL1	20	2	0	0	2	0	0.030151	0.324316	1.74126
CUX2	20	2	0	0	2	0	0.030151	0.324316	1.74126
CLCN3	21	2	0	1	1	1	0.0327551	0.324316	0
CXorf42	21	2	0	1	1	0	0.0327551	0.324316	0.693147
GNG7	95	4	0	0	4	2	0.0352667	0.324316	1.99574
CACNA2D3	96	4	0	0	4	2	0.0363872	0.324316	1.99574
ARL5C	2	1	0	0	1	0	0.0367456	0.324316	0.693147
AVL9	2	1	0	0	1	0	0.0367456	0.324316	0.693147
BEND4	2	1	0	0	1	0	0.0367456	0.324316	0.693147
C19orf42	2	1	0	0	1	0	0.0367456	0.324316	0.693147
C9orf114	2	1	0	0	1	0	0.0367456	0.324316	0.693147
CBX2	2	1	0	0	1	0	0.0367456	0.324316	0.693147
CCDC75	2	1	0	0	1	0	0.0367456	0.324316	0.693147
CDAN1	2	1	0	1	0	0	0.0367456	0.324316	0
CEBPA	2	1	1	0	0	0	0.0367456	0.324316	0
CPSF7	2	1	0	1	0	0	0.0367456	0.324316	0
CSNK2A2	2	1	1	0	0	0	0.0367456	0.324316	0
ERMP1	2	1	0	0	1	0	0.0367456	0.324316	0.693147
FBXW9	2	1	0	0	1	0	0.0367456	0.324316	0.693147
GRAMD1B	2	1	0	0	1	0	0.0367456	0.324316	0.693147
GRHL1	2	1	0	1	0	0	0.0367456	0.324316	0
GRINA	2	1	0	0	1	0	0.0367456	0.324316	0.693147
HERC6	2	1	0	0	1	0	0.0367456	0.324316	0.693147
IGFBP7	2	1	0	1	0	0	0.0367456	0.324316	0
INPP5J	2	1	0	0	1	0	0.0367456	0.324316	0.693147
ITIH5L	2	1	0	0	1	0	0.0367456	0.324316	0.693147
KLF11	2	1	0	0	1	0	0.0367456	0.324316	0.693147
LHX4	2	1	0	0	1	0	0.0367456	0.324316	0.693147
LOC100134713	2	1	1	0	0	0	0.0367456	0.324316	0
LOC143666	2	1	0	1	0	0	0.0367456	0.324316	0
LRRCC1	2	1	0	0	1	0	0.0367456	0.324316	0.693147
MGC16025	2	1	0	1	0	0	0.0367456	0.324316	0
MGC42105	2	1	0	0	1	0	0.0367456	0.324316	0.693147
MOSC1	2	1	0	0	1	0	0.0367456	0.324316	0.693147
MSX2	2	1	0	1	0	0	0.0367456	0.324316	0
NASP	2	1	0	0	1	0	0.0367456	0.324316	0.693147
NOTCH2	2	1	0	0	1	0	0.0367456	0.324316	0.693147
NPW	2	1	0	1	0	0	0.0367456	0.324316	0
OBSCN	2	1	0	0	1	0	0.0367456	0.324316	0.693147
PFN1	2	1	0	0	1	0	0.0367456	0.324316	0.693147
PKN1	2	1	0	0	1	0	0.0367456	0.324316	0.693147
SAMD14	2	1	0	0	1	1	0.0367456	0.324316	0
SLC25A1	2	1	0	0	1	0	0.0367456	0.324316	0.693147
SLC9A5	2	1	0	0	1	0	0.0367456	0.324316	0.693147
STOM	2	1	0	0	1	0	0.0367456	0.324316	0.693147
SUOX	2	1	0	0	1	0	0.0367456	0.324316	0.693147
TMEM229B	2	1	1	0	0	0	0.0367456	0.324316	0
UBXN1	2	1	0	0	1	0	0.0367456	0.324316	0.693147
ZBTB9	2	1	0	1	0	0	0.0367456	0.324316	0
ZNF12	2	1	0	1	0	0	0.0367456	0.324316	0
ZNHIT6	2	1	0	1	0	0	0.0367456	0.324316	0
C12orf65	23	2	1	0	1	0	0.0382146	0.324316	0.693147
GJC1	23	2	2	0	0	0	0.0382146	0.324316	0
PLEKHG4	23	2	1	1	0	0	0.0382146	0.324316	0
PRKCB	23	2	0	0	2	1	0.0382146	0.324316	1.04811
ZBTB38	23	2	0	0	2	0	0.0382146	0.324316	1.74126
ZNF335	23	2	0	0	2	0	0.0382146	0.324316	1.74126
CNTN6	57	3	0	0	3	0	0.0387157	0.324316	2.77259
SLC38A11	57	3	1	0	2	0	0.0387157	0.324316	1.74126
ADAMTS12	58	3	0	0	3	0	0.0403535	0.324316	2.77259
ADAM23	24	2	1	1	0	0	0.041065	0.324316	0
CASK	24	2	0	0	2	0	0.041065	0.324316	1.74126
INPP4B	24	2	0	0	2	0	0.041065	0.324316	1.74126
PROM1	24	2	0	0	2	0	0.041065	0.324316	1.74126
AGPAT3	25	2	0	0	2	1	0.0439926	0.324316	1.04811
BLM	26	2	0	0	2	0	0.0469951	0.324316	1.74126
CEP250	26	2	1	0	1	0	0.0469951	0.324316	0.693147
FSTL3	26	2	0	2	0	0	0.0469951	0.324316	0
PPP2R2B	26	2	0	0	2	0	0.0469951	0.324316	1.74126
ACOXL	3	1	0	0	1	0	0.0486914	0.324316	0.693147
BBS2	3	1	0	0	1	0	0.0486914	0.324316	0.693147
C20orf186	3	1	0	0	1	0	0.0486914	0.324316	0.693147
C9orf25	3	1	0	0	1	0	0.0486914	0.324316	0.693147
C9orf50	3	1	1	0	0	0	0.0486914	0.324316	0
CBR1	3	1	0	0	1	0	0.0486914	0.324316	0.693147
CCNH	3	1	0	0	1	0	0.0486914	0.324316	0.693147
CLECL1	3	1	0	0	1	0	0.0486914	0.324316	0.693147
DOM3Z	3	1	0	0	1	0	0.0486914	0.324316	0.693147
EPS8L2	3	1	1	0	0	0	0.0486914	0.324316	0
EXTL1	3	1	1	0	0	0	0.0486914	0.324316	0
FGF9	3	1	0	0	1	0	0.0486914	0.324316	0.693147
FLII	3	1	1	0	0	0	0.0486914	0.324316	0
GSTK1	3	1	0	0	1	0	0.0486914	0.324316	0.693147
GTPBP8	3	1	0	0	1	0	0.0486914	0.324316	0.693147
HIP1R	3	1	0	0	1	0	0.0486914	0.324316	0.693147
HRNBP3	3	1	0	0	1	0	0.0486914	0.324316	0.693147
IFI27L1	3	1	0	0	1	0	0.0486914	0.324316	0.693147
KLHL9	3	1	1	0	0	0	0.0486914	0.324316	0
LCP1	3	1	0	0	1	0	0.0486914	0.324316	0.693147
LDLRAP1	3	1	1	0	0	0	0.0486914	0.324316	0
LOC642852	3	1	1	0	0	0	0.0486914	0.324316	0
LUZP1	3	1	0	1	0	0	0.0486914	0.324316	0
MTERFD2	3	1	0	1	0	0	0.0486914	0.324316	0
MTMR1	3	1	0	0	1	1	0.0486914	0.324316	0
NEU3	3	1	0	0	1	0	0.0486914	0.324316	0.693147
NICN1	3	1	0	0	1	0	0.0486914	0.324316	0.693147
NTHL1	3	1	0	0	1	0	0.0486914	0.324316	0.693147
ORC1L	3	1	0	1	0	0	0.0486914	0.324316	0
PFKFB4	3	1	0	0	1	0	0.0486914	0.324316	0.693147
PKP4	3	1	0	0	1	0	0.0486914	0.324316	0.693147
PLSCR1	3	1	0	0	1	0	0.0486914	0.324316	0.693147
POLR2I	3	1	1	0	0	0	0.0486914	0.324316	0
POLR3GL	3	1	0	0	1	0	0.0486914	0.324316	0.693147
PRKD3	3	1	0	0	1	0	0.0486914	0.324316	0.693147
PSRC1	3	1	0	1	0	0	0.0486914	0.324316	0
RNF141	3	1	0	0	1	0	0.0486914	0.324316	0.693147
SIRT7	3	1	0	0	1	0	0.0486914	0.324316	0.693147
SLC43A3	3	1	0	0	1	0	0.0486914	0.324316	0.693147
TMC5	3	1	0	0	1	0	0.0486914	0.324316	0.693147
TPRA1	3	1	0	0	1	0	0.0486914	0.324316	0.693147
TRPC6	3	1	0	0	1	0	0.0486914	0.324316	0.693147
TSHR	3	1	1	0	0	0	0.0486914	0.324316	0
TSNARE1	3	1	0	0	1	0	0.0486914	0.324316	0.693147
TSSK6	3	1	0	1	0	0	0.0486914	0.324316	0
UBE2J2	3	1	0	0	1	0	0.0486914	0.324316	0.693147
UBE3A	3	1	0	0	1	0	0.0486914	0.324316	0.693147
WNT2B	3	1	0	0	1	0	0.0486914	0.324316	0.693147
XRCC6BP1	3	1	0	0	1	0	0.0486914	0.324316	0.693147
ZNF281	3	1	1	0	0	0	0.0486914	0.324316	0
ZNF438	3	1	0	0	1	0	0.0486914	0.324316	0.693147
ZNF543	3	1	0	0	1	0	0.0486914	0.324316	0.693147
SLC7A11	63	3	0	0	3	0	0.0490556	0.324632	2.77259
HIBADH	154	5	0	0	5	1	0.0491084	0.324632	3.93848
CLN6	27	2	0	0	2	0	0.0500701	0.324632	1.74126
SEMA5A	27	2	0	0	2	2	0.0500701	0.324632	0
SNX3	27	2	0	1	1	0	0.0500701	0.324632	0.693147
ATPBD4	65	3	0	0	3	0	0.0527717	0.324632	2.77259
EGLN3	65	3	0	0	3	0	0.0527717	0.324632	2.77259
FAM108C1	65	3	2	1	0	0	0.0527717	0.324632	0
MELK	28	2	0	0	2	0	0.0532155	0.324632	1.74126
GALNT13	29	2	0	0	2	0	0.0564289	0.324632	1.74126
SNUPN	29	2	2	0	0	0	0.0564289	0.324632	0
AGPAT9	30	2	0	1	1	0	0.0597083	0.324632	0.693147
C17orf86	30	2	0	2	0	2	0.0597083	0.324632	-1.74126
ANGEL1	4	1	0	0	1	0	0.0604891	0.324632	0.693147
ARHGAP4	4	1	0	0	1	0	0.0604891	0.324632	0.693147
ARL4C	4	1	0	1	0	0	0.0604891	0.324632	0
ARSD	4	1	0	0	1	0	0.0604891	0.324632	0.693147
BTG4	4	1	0	0	1	0	0.0604891	0.324632	0.693147
C1orf31	4	1	0	1	0	1	0.0604891	0.324632	-0.693147
C4orf10	4	1	0	1	0	0	0.0604891	0.324632	0
CALM2	4	1	0	0	1	0	0.0604891	0.324632	0.693147
CD2BP2	4	1	1	0	0	0	0.0604891	0.324632	0
CDC34	4	1	0	0	1	0	0.0604891	0.324632	0.693147
CILP	4	1	1	0	0	0	0.0604891	0.324632	0
COX16	4	1	0	0	1	0	0.0604891	0.324632	0.693147
CTNNAL1	4	1	0	0	1	0	0.0604891	0.324632	0.693147
DAGLA	4	1	0	0	1	0	0.0604891	0.324632	0.693147
E2F4	4	1	0	1	0	0	0.0604891	0.324632	0
HMGXB3	4	1	0	0	1	0	0.0604891	0.324632	0.693147
KLHDC1	4	1	0	0	1	0	0.0604891	0.324632	0.693147
KPNA3	4	1	0	1	0	0	0.0604891	0.324632	0
LOC220930	4	1	0	0	1	0	0.0604891	0.324632	0.693147
LOC646982	4	1	0	0	1	0	0.0604891	0.324632	0.693147
LYPLA2	4	1	0	0	1	0	0.0604891	0.324632	0.693147
MED29	4	1	1	0	0	0	0.0604891	0.324632	0
MPP7	4	1	0	0	1	0	0.0604891	0.324632	0.693147
MUC4	4	1	1	0	0	0	0.0604891	0.324632	0
MXD1	4	1	0	0	1	0	0.0604891	0.324632	0.693147
NAA30	4	1	1	0	0	0	0.0604891	0.324632	0
NCRNA00235	4	1	1	0	0	0	0.0604891	0.324632	0
NEIL2	4	1	1	0	0	0	0.0604891	0.324632	0
PAPD7	4	1	0	0	1	0	0.0604891	0.324632	0.693147
PLEKHA3	4	1	0	0	1	0	0.0604891	0.324632	0.693147
PNPLA7	4	1	0	1	0	0	0.0604891	0.324632	0
POC1A	4	1	0	0	1	0	0.0604891	0.324632	0.693147
RHOC	4	1	0	0	1	0	0.0604891	0.324632	0.693147
SLC25A21	4	1	0	0	1	0	0.0604891	0.324632	0.693147
SLC27A4	4	1	0	0	1	0	0.0604891	0.324632	0.693147
SLC41A2	4	1	0	0	1	1	0.0604891	0.324632	0
SMNDC1	4	1	1	0	0	0	0.0604891	0.324632	0
SNORD12C	4	1	1	0	0	0	0.0604891	0.324632	0
SPIN1	4	1	0	0	1	0	0.0604891	0.324632	0.693147
STK25	4	1	0	0	1	0	0.0604891	0.324632	0.693147
TBP	4	1	0	0	1	0	0.0604891	0.324632	0.693147
TENC1	4	1	0	0	1	0	0.0604891	0.324632	0.693147
THAP11	4	1	1	0	0	0	0.0604891	0.324632	0
TRIM35	4	1	0	1	0	0	0.0604891	0.324632	0
TUSC1	4	1	0	1	0	0	0.0604891	0.324632	0
VIM	4	1	0	0	1	0	0.0604891	0.324632	0.693147
WBP5	4	1	0	1	0	0	0.0604891	0.324632	0
ZBTB43	4	1	0	0	1	0	0.0604891	0.324632	0.693147
NCRNA00182	70	3	0	0	3	0	0.0626313	0.324632	2.77259
JMJD1C	31	2	0	0	2	0	0.0630514	0.324632	1.74126
MAPT	31	2	0	0	2	1	0.0630514	0.324632	1.04811
USP34	71	3	0	0	3	1	0.0646986	0.324632	2.07944
MAP4K3	221	6	0	0	6	2	0.0653432	0.324632	3.7216
APIP	32	2	0	0	2	0	0.0664562	0.324632	1.74126
CTPS2	32	2	1	1	0	0	0.0664562	0.324632	0
NUAK1	32	2	0	0	2	0	0.0664562	0.324632	1.74126
RALYL	32	2	0	0	2	0	0.0664562	0.324632	1.74126
SACS	32	2	0	0	2	0	0.0664562	0.324632	1.74126
SEC14L2	32	2	0	2	0	0	0.0664562	0.324632	0
XPO4	32	2	0	0	2	0	0.0664562	0.324632	1.74126
ZMYND8	169	5	0	0	5	3	0.0668996	0.324632	1.85904
NR6A1	119	4	0	0	4	2	0.067741	0.324632	1.99574
VIT	73	3	0	0	3	0	0.0689259	0.324632	2.77259
SLC25A16	33	2	0	0	2	0	0.0699207	0.324632	1.74126
YDJC	33	2	0	1	1	0	0.0699207	0.324632	0.693147
PTPRM	74	3	0	0	3	0	0.0710854	0.324632	2.77259
ANKRD27	5	1	0	0	1	0	0.0721404	0.324632	0.693147
ANKRD29	5	1	0	0	1	0	0.0721404	0.324632	0.693147
ARHGAP26	5	1	0	0	1	0	0.0721404	0.324632	0.693147
ASNA1	5	1	1	0	0	0	0.0721404	0.324632	0
BOP1	5	1	0	0	1	0	0.0721404	0.324632	0.693147
C20orf30	5	1	0	0	1	0	0.0721404	0.324632	0.693147
CN5H6.4	5	1	1	0	0	0	0.0721404	0.324632	0
EIF4H	5	1	0	0	1	0	0.0721404	0.324632	0.693147
GFM1	5	1	0	0	1	0	0.0721404	0.324632	0.693147
GGCT	5	1	0	1	0	0	0.0721404	0.324632	0
GMIP	5	1	0	0	1	0	0.0721404	0.324632	0.693147
GPR176	5	1	0	0	1	0	0.0721404	0.324632	0.693147
IGFBPL1	5	1	0	0	1	0	0.0721404	0.324632	0.693147
IL12A	5	1	0	1	0	0	0.0721404	0.324632	0
IL34	5	1	0	0	1	0	0.0721404	0.324632	0.693147
ISLR2	5	1	1	0	0	0	0.0721404	0.324632	0
KLHDC4	5	1	0	1	0	0	0.0721404	0.324632	0
LIPT2	5	1	0	1	0	0	0.0721404	0.324632	0
LOC100126784	5	1	0	1	0	0	0.0721404	0.324632	0
LTA4H	5	1	0	0	1	0	0.0721404	0.324632	0.693147
MADD	5	1	1	0	0	0	0.0721404	0.324632	0
MAST1	5	1	0	0	1	0	0.0721404	0.324632	0.693147
MBP	5	1	0	0	1	0	0.0721404	0.324632	0.693147
MESP1	5	1	1	0	0	0	0.0721404	0.324632	0
MTMR9L	5	1	1	0	0	0	0.0721404	0.324632	0
NDFIP1	5	1	0	0	1	0	0.0721404	0.324632	0.693147
NDUFAB1	5	1	0	0	1	1	0.0721404	0.324632	0
NPDC1	5	1	0	1	0	0	0.0721404	0.324632	0
OSTBETA	5	1	0	0	1	0	0.0721404	0.324632	0.693147
PDE12	5	1	1	0	0	0	0.0721404	0.324632	0
PHLPP2	5	1	0	0	1	0	0.0721404	0.324632	0.693147
PLEKHH1	5	1	0	0	1	0	0.0721404	0.324632	0.693147
PRKCH	5	1	0	0	1	0	0.0721404	0.324632	0.693147
PRMT6	5	1	1	0	0	0	0.0721404	0.324632	0
PRPF38B	5	1	0	0	1	0	0.0721404	0.324632	0.693147
RAB23	5	1	0	0	1	0	0.0721404	0.324632	0.693147
RAB3A	5	1	0	0	1	0	0.0721404	0.324632	0.693147
RALGAPB	5	1	0	0	1	0	0.0721404	0.324632	0.693147
RASA3	5	1	0	0	1	0	0.0721404	0.324632	0.693147
RBP1	5	1	0	0	1	0	0.0721404	0.324632	0.693147
RIMS4	5	1	0	0	1	0	0.0721404	0.324632	0.693147
ROCK1	5	1	0	1	0	0	0.0721404	0.324632	0
ROCK2	5	1	0	0	1	0	0.0721404	0.324632	0.693147
RTN2	5	1	0	0	1	0	0.0721404	0.324632	0.693147
SLC39A7	5	1	0	1	0	0	0.0721404	0.324632	0
SLC47A1	5	1	0	0	1	0	0.0721404	0.324632	0.693147
SLC9A3R1	5	1	0	0	1	0	0.0721404	0.324632	0.693147
TMUB2	5	1	1	0	0	0	0.0721404	0.324632	0
TPBG	5	1	1	0	0	0	0.0721404	0.324632	0
ZBTB44	5	1	0	0	1	0	0.0721404	0.324632	0.693147
ZIC2	5	1	0	0	1	0	0.0721404	0.324632	0.693147
ZNF358	5	1	0	0	1	0	0.0721404	0.324632	0.693147
ZNF521	5	1	0	1	0	0	0.0721404	0.324632	0
ZNF564	5	1	0	0	1	0	0.0721404	0.324632	0.693147
FLJ37453	75	3	0	3	0	1	0.0732749	0.328935	-0.693147
PLD6	35	2	0	1	1	0	0.0770206	0.329659	0.693147
RSBN1L	35	2	0	1	1	1	0.0770206	0.329659	0
VPS13D	178	5	0	0	5	1	0.0790773	0.329659	3.93848
SPEN	78	3	0	0	3	0	0.0800204	0.329659	2.77259
DAPK2	36	2	0	0	2	0	0.0806521	0.329659	1.74126
FILIP1	36	2	0	0	2	1	0.0806521	0.329659	1.04811
PLCE1	36	2	0	0	2	0	0.0806521	0.329659	1.74126
SPHK2	36	2	1	0	1	0	0.0806521	0.329659	0.693147
TXNDC15	36	2	2	0	0	0	0.0806521	0.329659	0
NXN	128	4	0	0	4	2	0.0828465	0.329659	1.99574
AGBL4	6	1	0	0	1	0	0.0836471	0.329659	0.693147
APTX	6	1	0	0	1	0	0.0836471	0.329659	0.693147
ARL5B	6	1	0	0	1	0	0.0836471	0.329659	0.693147
BCHE	6	1	0	1	0	0	0.0836471	0.329659	0
C13orf16	6	1	0	0	1	0	0.0836471	0.329659	0.693147
C1orf96	6	1	0	0	1	0	0.0836471	0.329659	0.693147
C5orf38	6	1	0	1	0	0	0.0836471	0.329659	0
CASP2	6	1	0	0	1	0	0.0836471	0.329659	0.693147
CDHR3	6	1	0	0	1	0	0.0836471	0.329659	0.693147
CHERP	6	1	0	0	1	0	0.0836471	0.329659	0.693147
CMTM3	6	1	0	1	0	0	0.0836471	0.329659	0
CYTH3	6	1	0	0	1	0	0.0836471	0.329659	0.693147
DDHD2	6	1	1	0	0	0	0.0836471	0.329659	0
DHRS3	6	1	0	0	1	1	0.0836471	0.329659	0
FAM18A	6	1	0	0	1	0	0.0836471	0.329659	0.693147
FCHO1	6	1	0	1	0	0	0.0836471	0.329659	0
FIG4	6	1	0	0	1	0	0.0836471	0.329659	0.693147
FLJ33630	6	1	0	0	1	1	0.0836471	0.329659	0
FLOT2	6	1	0	0	1	1	0.0836471	0.329659	0
HSPH1	6	1	0	1	0	0	0.0836471	0.329659	0
IQSEC2	6	1	0	0	1	0	0.0836471	0.329659	0.693147
KCNIP4	6	1	0	0	1	0	0.0836471	0.329659	0.693147
LOC100128164	6	1	1	0	0	0	0.0836471	0.329659	0
LOC100132354	6	1	0	0	1	0	0.0836471	0.329659	0.693147
MARVELD1	6	1	1	0	0	0	0.0836471	0.329659	0
MYO15B	6	1	0	0	1	0	0.0836471	0.329659	0.693147
NOP10	6	1	0	0	1	0	0.0836471	0.329659	0.693147
NTNG2	6	1	0	0	1	0	0.0836471	0.329659	0.693147
ORC5L	6	1	0	0	1	0	0.0836471	0.329659	0.693147
PHF21B	6	1	0	0	1	0	0.0836471	0.329659	0.693147
PITPNM3	6	1	1	0	0	0	0.0836471	0.329659	0
PRICKLE4	6	1	1	0	0	0	0.0836471	0.329659	0
PRKCSH	6	1	0	0	1	0	0.0836471	0.329659	0.693147
REXO4	6	1	0	0	1	1	0.0836471	0.329659	0
RIMS1	6	1	1	0	0	0	0.0836471	0.329659	0
SDAD1	6	1	1	0	0	0	0.0836471	0.329659	0
SLC10A3	6	1	1	0	0	0	0.0836471	0.329659	0
SLC8A1	6	1	0	0	1	0	0.0836471	0.329659	0.693147
SMS	6	1	0	0	1	0	0.0836471	0.329659	0.693147
SYNM	6	1	0	0	1	0	0.0836471	0.329659	0.693147
TBX19	6	1	0	0	1	0	0.0836471	0.329659	0.693147
TEX10	6	1	0	0	1	0	0.0836471	0.329659	0.693147
TKTL1	6	1	0	0	1	0	0.0836471	0.329659	0.693147
TRIM56	6	1	0	0	1	0	0.0836471	0.329659	0.693147
TSC22D4	6	1	1	0	0	0	0.0836471	0.329659	0
UBE2Q1	6	1	0	0	1	1	0.0836471	0.329659	0
VPS18	6	1	0	0	1	0	0.0836471	0.329659	0.693147
ATN1	37	2	1	1	0	0	0.0843355	0.329659	0
DENND5B	37	2	1	0	1	0	0.0843355	0.329659	0.693147
MAP2	37	2	0	0	2	0	0.0843355	0.329659	1.74126
RAD23A	37	2	0	0	2	1	0.0843355	0.329659	1.04811
RSF1	81	3	0	0	3	0	0.087024	0.331999	2.77259
SDCCAG8	81	3	0	0	3	1	0.087024	0.331999	2.07944
AHRR	38	2	0	0	2	3	0.088069	0.331999	-1.03133
CSK	38	2	0	0	2	0	0.088069	0.331999	1.74126
LOC100271722	38	2	1	0	1	1	0.088069	0.331999	0
PRKD1	82	3	0	0	3	0	0.0894142	0.331999	2.77259
NUDT3	39	2	0	0	2	1	0.0918506	0.331999	1.04811
ATF5	7	1	0	1	0	0	0.0950111	0.331999	0
ATP5I	7	1	0	0	1	0	0.0950111	0.331999	0.693147
B3GALT6	7	1	1	0	0	0	0.0950111	0.331999	0
CFTR	7	1	0	0	1	0	0.0950111	0.331999	0.693147
CIB2	7	1	0	0	1	0	0.0950111	0.331999	0.693147
CISD1	7	1	0	0	1	0	0.0950111	0.331999	0.693147
CNOT3	7	1	0	0	1	0	0.0950111	0.331999	0.693147
CNTROB	7	1	1	0	0	0	0.0950111	0.331999	0
COL18A1	7	1	0	0	1	0	0.0950111	0.331999	0.693147
COMTD1	7	1	0	1	0	0	0.0950111	0.331999	0
CSNK2A1	7	1	0	0	1	0	0.0950111	0.331999	0.693147
CWC27	7	1	0	0	1	0	0.0950111	0.331999	0.693147
DOPEY1	7	1	0	0	1	0	0.0950111	0.331999	0.693147
EBF2	7	1	0	0	1	0	0.0950111	0.331999	0.693147
ERCC5	7	1	0	1	0	0	0.0950111	0.331999	0
ESR2	7	1	1	0	0	0	0.0950111	0.331999	0
EZH2	7	1	0	0	1	0	0.0950111	0.331999	0.693147
FAS	7	1	0	0	1	0	0.0950111	0.331999	0.693147
GOT2	7	1	0	0	1	0	0.0950111	0.331999	0.693147
IP6K3	7	1	0	0	1	0	0.0950111	0.331999	0.693147
IRX5	7	1	0	0	1	0	0.0950111	0.331999	0.693147
ITGB1BP1	7	1	0	0	1	0	0.0950111	0.331999	0.693147
KIF5B	7	1	0	1	0	0	0.0950111	0.331999	0
LOC152217	7	1	1	0	0	0	0.0950111	0.331999	0
LOC400657	7	1	1	0	0	0	0.0950111	0.331999	0
LOC644538	7	1	0	1	0	0	0.0950111	0.331999	0
LRRK2	7	1	0	1	0	0	0.0950111	0.331999	0
LY75	7	1	0	0	1	0	0.0950111	0.331999	0.693147
NCAPD3	7	1	0	1	0	0	0.0950111	0.331999	0
POLD1	7	1	0	0	1	1	0.0950111	0.331999	0
RCN3	7	1	0	0	1	0	0.0950111	0.331999	0.693147
RGS17	7	1	0	0	1	0	0.0950111	0.331999	0.693147
RNASEH1	7	1	0	0	1	0	0.0950111	0.331999	0.693147
RRP8	7	1	0	0	1	1	0.0950111	0.331999	0
SH3RF2	7	1	0	0	1	0	0.0950111	0.331999	0.693147
SHROOM2	7	1	0	0	1	0	0.0950111	0.331999	0.693147
SLC30A1	7	1	0	1	0	0	0.0950111	0.331999	0
SMARCC2	7	1	0	0	1	0	0.0950111	0.331999	0.693147
ST7OT1	7	1	1	0	0	0	0.0950111	0.331999	0
SUSD5	7	1	0	0	1	0	0.0950111	0.331999	0.693147
TDO2	7	1	0	0	1	0	0.0950111	0.331999	0.693147
THBS2	7	1	0	0	1	0	0.0950111	0.331999	0.693147
TNFAIP6	7	1	0	0	1	0	0.0950111	0.331999	0.693147
TNFRSF21	7	1	0	0	1	0	0.0950111	0.331999	0.693147
TRPM8	7	1	0	0	1	1	0.0950111	0.331999	0
TSC2	7	1	0	0	1	0	0.0950111	0.331999	0.693147
TSSC1	7	1	0	0	1	0	0.0950111	0.331999	0.693147
UBE2O	7	1	0	0	1	0	0.0950111	0.331999	0.693147
ZNF195	7	1	0	0	1	0	0.0950111	0.331999	0.693147
ODZ2	40	2	0	0	2	1	0.0956787	0.33307	1.04811
TRDN	40	2	0	0	2	0	0.0956787	0.33307	1.74126
SUPT3H	85	3	0	0	3	0	0.0967465	0.336153	2.77259
ZNF462	86	3	0	1	2	1	0.0992433	0.336773	1.04811
DMXL1	41	2	0	0	2	1	0.0995515	0.336773	1.04811
HELZ	41	2	0	0	2	0	0.0995515	0.336773	1.74126
TBC1D14	41	2	0	0	2	0	0.0995515	0.336773	1.74126
ACAP3	8	1	0	0	1	0	0.106234	0.336773	0.693147
ATP8B2	8	1	0	0	1	0	0.106234	0.336773	0.693147
BCR	8	1	1	0	0	0	0.106234	0.336773	0
C16orf72	8	1	0	0	1	0	0.106234	0.336773	0.693147
C3orf71	8	1	0	1	0	0	0.106234	0.336773	0
CYB5D1	8	1	1	0	0	0	0.106234	0.336773	0
DHX37	8	1	0	0	1	0	0.106234	0.336773	0.693147
DPYS	8	1	0	0	1	0	0.106234	0.336773	0.693147
EIF3E	8	1	0	0	1	0	0.106234	0.336773	0.693147
FAM19A4	8	1	0	0	1	0	0.106234	0.336773	0.693147
FAM84A	8	1	0	1	0	0	0.106234	0.336773	0
FBN1	8	1	0	0	1	0	0.106234	0.336773	0.693147
FUT11	8	1	1	0	0	0	0.106234	0.336773	0
GARS	8	1	1	0	0	0	0.106234	0.336773	0
GFPT2	8	1	0	0	1	1	0.106234	0.336773	0
GMCL1	8	1	0	1	0	0	0.106234	0.336773	0
HMGB1	8	1	0	0	1	0	0.106234	0.336773	0.693147
LIN9	8	1	0	0	1	0	0.106234	0.336773	0.693147
LRDD	8	1	0	0	1	0	0.106234	0.336773	0.693147
MAGEF1	8	1	0	1	0	0	0.106234	0.336773	0
MBD4	8	1	0	1	0	0	0.106234	0.336773	0
MGAT4B	8	1	0	0	1	0	0.106234	0.336773	0.693147
MLLT4	8	1	0	0	1	0	0.106234	0.336773	0.693147
NDUFB9	8	1	0	0	1	1	0.106234	0.336773	0
NOTCH3	8	1	0	0	1	0	0.106234	0.336773	0.693147
NR2F6	8	1	1	0	0	2	0.106234	0.336773	-1.74126
NUPL2	8	1	1	0	0	0	0.106234	0.336773	0
PHF11	8	1	0	0	1	0	0.106234	0.336773	0.693147
PNPLA3	8	1	0	0	1	0	0.106234	0.336773	0.693147
POLL	8	1	0	0	1	0	0.106234	0.336773	0.693147
PRDX2	8	1	0	1	0	0	0.106234	0.336773	0
PRPF39	8	1	0	0	1	0	0.106234	0.336773	0.693147
PRPF4	8	1	0	0	1	0	0.106234	0.336773	0.693147
RGP1	8	1	0	0	1	0	0.106234	0.336773	0.693147
SLC27A5	8	1	0	1	0	0	0.106234	0.336773	0
SMC5	8	1	0	0	1	0	0.106234	0.336773	0.693147
SRR	8	1	0	0	1	0	0.106234	0.336773	0.693147
TAOK2	8	1	1	0	0	0	0.106234	0.336773	0
TMEM136	8	1	0	0	1	0	0.106234	0.336773	0.693147
TMEM150C	8	1	0	0	1	0	0.106234	0.336773	0.693147
TUFT1	8	1	0	0	1	0	0.106234	0.336773	0.693147
ULK3	8	1	1	0	0	1	0.106234	0.336773	-0.693147
WDFY4	8	1	0	0	1	0	0.106234	0.336773	0.693147
ZADH2	8	1	0	0	1	0	0.106234	0.336773	0.693147
ZC3H8	8	1	0	0	1	0	0.106234	0.336773	0.693147
ZKSCAN5	8	1	1	0	0	0	0.106234	0.336773	0
ZNF267	8	1	0	0	1	1	0.106234	0.336773	0
ANGPT1	141	4	0	1	3	3	0.107286	0.338206	0
CCDC46	43	2	1	0	1	0	0.107424	0.338206	0.693147
RPTOR	43	2	0	0	2	0	0.107424	0.338206	1.74126
BMF	143	4	1	1	2	1	0.111305	0.338206	1.04811
TMEM26	44	2	1	0	1	0	0.111421	0.338206	0.693147
CHD9	91	3	0	1	2	1	0.112105	0.338206	1.04811
CSMD3	91	3	0	0	3	0	0.112105	0.338206	2.77259
AHSA2	9	1	0	1	0	0	0.117318	0.338206	0
AKAP1	9	1	0	0	1	0	0.117318	0.338206	0.693147
ALS2CR4	9	1	0	0	1	0	0.117318	0.338206	0.693147
ARHGEF19	9	1	0	0	1	0	0.117318	0.338206	0.693147
ARID4B	9	1	0	1	0	0	0.117318	0.338206	0
BET3L	9	1	0	0	1	0	0.117318	0.338206	0.693147
C14orf4	9	1	1	0	0	0	0.117318	0.338206	0
C1orf89	9	1	1	0	0	0	0.117318	0.338206	0
CORO2B	9	1	0	0	1	0	0.117318	0.338206	0.693147
CPEB4	9	1	0	0	1	0	0.117318	0.338206	0.693147
EPS8	9	1	0	0	1	0	0.117318	0.338206	0.693147
ETV2	9	1	1	0	0	0	0.117318	0.338206	0
FAM161A	9	1	0	0	1	0	0.117318	0.338206	0.693147
FAM169A	9	1	0	0	1	0	0.117318	0.338206	0.693147
FAM193A	9	1	0	0	1	0	0.117318	0.338206	0.693147
FIS1	9	1	0	0	1	0	0.117318	0.338206	0.693147
GEN1	9	1	1	0	0	0	0.117318	0.338206	0
GLT25D1	9	1	0	0	1	1	0.117318	0.338206	0
GNA15	9	1	0	0	1	0	0.117318	0.338206	0.693147
KIAA1109	9	1	0	0	1	0	0.117318	0.338206	0.693147
KLF13	9	1	0	0	1	0	0.117318	0.338206	0.693147
MKS1	9	1	1	0	0	0	0.117318	0.338206	0
MORN1	9	1	0	0	1	0	0.117318	0.338206	0.693147
MUS81	9	1	0	1	0	1	0.117318	0.338206	-0.693147
NFKBIZ	9	1	1	0	0	1	0.117318	0.338206	-0.693147
OPA1	9	1	0	0	1	0	0.117318	0.338206	0.693147
PCSK6	9	1	0	0	1	0	0.117318	0.338206	0.693147
POR	9	1	0	0	1	0	0.117318	0.338206	0.693147
POU1F1	9	1	0	0	1	0	0.117318	0.338206	0.693147
PPM1G	9	1	0	0	1	0	0.117318	0.338206	0.693147
RAD18	9	1	0	0	1	0	0.117318	0.338206	0.693147
RDH10	9	1	0	0	1	0	0.117318	0.338206	0.693147
RHBDD2	9	1	0	0	1	0	0.117318	0.338206	0.693147
RIF1	9	1	0	0	1	0	0.117318	0.338206	0.693147
RIPK1	9	1	0	0	1	0	0.117318	0.338206	0.693147
SLC37A4	9	1	0	1	0	0	0.117318	0.338206	0
SLC5A10	9	1	0	0	1	0	0.117318	0.338206	0.693147
SOX13	9	1	0	0	1	0	0.117318	0.338206	0.693147
STT3B	9	1	0	0	1	0	0.117318	0.338206	0.693147
TAPBP	9	1	0	1	0	0	0.117318	0.338206	0
TRAPPC10	9	1	0	1	0	0	0.117318	0.338206	0
TSC22D3	9	1	0	0	1	1	0.117318	0.338206	0
TYMP	9	1	1	0	0	0	0.117318	0.338206	0
TYRO3	9	1	0	0	1	0	0.117318	0.338206	0.693147
UBE2G2	9	1	0	0	1	0	0.117318	0.338206	0.693147
VTI1B	9	1	0	0	1	1	0.117318	0.338206	0
ZBTB32	9	1	0	0	1	0	0.117318	0.338206	0.693147
ZDHHC17	9	1	0	0	1	0	0.117318	0.338206	0.693147
ZFYVE16	9	1	0	0	1	0	0.117318	0.338206	0.693147
ZNF227	9	1	0	0	1	0	0.117318	0.338206	0.693147
ZNF616	9	1	0	0	1	0	0.117318	0.338206	0.693147
STK4	46	2	0	0	2	0	0.119528	0.343503	1.74126
STX16	46	2	0	0	2	1	0.119528	0.343503	1.04811
CDK2AP1	94	3	0	1	2	2	0.12011	0.344104	0
PPP3CC	94	3	0	1	2	1	0.12011	0.344104	1.04811
NLK	204	5	0	0	5	3	0.1203	0.344113	1.85904
CNTLN	95	3	0	0	3	1	0.122824	0.34699	2.07944
EFTUD1	47	2	0	0	2	1	0.123634	0.34699	1.04811
LDB1	47	2	0	1	1	0	0.123634	0.34699	0.693147
SCAND2	47	2	0	1	1	0	0.123634	0.34699	0.693147
SIN3A	96	3	0	0	3	0	0.12556	0.34699	2.77259
KIAA1598	48	2	0	0	2	0	0.127774	0.34699	1.74126
P4HTM	48	2	1	0	1	0	0.127774	0.34699	0.693147
TBC1D23	48	2	0	0	2	2	0.127774	0.34699	0
C9orf95	10	1	0	0	1	0	0.128264	0.34699	0.693147
CEBPB	10	1	0	1	0	0	0.128264	0.34699	0
CHSY1	10	1	1	0	0	0	0.128264	0.34699	0
CSRP2	10	1	0	0	1	0	0.128264	0.34699	0.693147
CTBS	10	1	0	0	1	0	0.128264	0.34699	0.693147
DPP7	10	1	0	1	0	0	0.128264	0.34699	0
EPSTI1	10	1	0	0	1	0	0.128264	0.34699	0.693147
FAM120A	10	1	0	0	1	0	0.128264	0.34699	0.693147
FAM53C	10	1	0	0	1	0	0.128264	0.34699	0.693147
FAM69B	10	1	1	0	0	0	0.128264	0.34699	0
FASTK	10	1	0	0	1	0	0.128264	0.34699	0.693147
MEGF8	10	1	1	0	0	0	0.128264	0.34699	0
MEX3A	10	1	1	0	0	0	0.128264	0.34699	0
MYO5C	10	1	0	0	1	0	0.128264	0.34699	0.693147
NAA50	10	1	0	1	0	0	0.128264	0.34699	0
NHLRC2	10	1	1	0	0	1	0.128264	0.34699	-0.693147
PCNP	10	1	0	0	1	0	0.128264	0.34699	0.693147
RBM41	10	1	0	0	1	0	0.128264	0.34699	0.693147
RGS20	10	1	0	0	1	0	0.128264	0.34699	0.693147
SCAMP1	10	1	0	0	1	0	0.128264	0.34699	0.693147
SMEK2	10	1	0	0	1	0	0.128264	0.34699	0.693147
STK31	10	1	0	0	1	1	0.128264	0.34699	0
STX8	10	1	0	0	1	0	0.128264	0.34699	0.693147
THNSL1	10	1	0	0	1	0	0.128264	0.34699	0.693147
THOC4	10	1	0	0	1	1	0.128264	0.34699	0
TSGA14	10	1	0	0	1	0	0.128264	0.34699	0.693147
XRCC4	10	1	0	0	1	0	0.128264	0.34699	0.693147
ZDHHC1	10	1	0	0	1	0	0.128264	0.34699	0.693147
ZNRD1	10	1	0	1	0	0	0.128264	0.34699	0
HUWE1	49	2	0	0	2	2	0.131947	0.351016	0
IDH3A	49	2	0	0	2	1	0.131947	0.351016	1.04811
SLC4A8	50	2	0	0	2	0	0.13615	0.351016	1.74126
ST8SIA4	50	2	0	0	2	1	0.13615	0.351016	1.04811
FAM198B	100	3	0	1	2	0	0.136719	0.351016	1.74126
ADCY10	11	1	0	0	1	0	0.139075	0.351016	0.693147
ALKBH4	11	1	0	0	1	0	0.139075	0.351016	0.693147
AP1S2	11	1	0	0	1	0	0.139075	0.351016	0.693147
ARID4A	11	1	0	0	1	0	0.139075	0.351016	0.693147
ASAP1	11	1	0	0	1	0	0.139075	0.351016	0.693147
ASPH	11	1	0	0	1	0	0.139075	0.351016	0.693147
ATP5S	11	1	1	0	0	0	0.139075	0.351016	0
BTBD11	11	1	0	0	1	0	0.139075	0.351016	0.693147
C1orf144	11	1	0	0	1	0	0.139075	0.351016	0.693147
C1orf86	11	1	0	0	1	0	0.139075	0.351016	0.693147
CACNA2D4	11	1	0	0	1	0	0.139075	0.351016	0.693147
CCDC137	11	1	1	0	0	0	0.139075	0.351016	0
CFLP1	11	1	0	0	1	0	0.139075	0.351016	0.693147
COL6A4P1	11	1	1	0	0	0	0.139075	0.351016	0
CYR61	11	1	1	0	0	0	0.139075	0.351016	0
EEF1B2	11	1	0	1	0	0	0.139075	0.351016	0
FAM57A	11	1	0	1	0	0	0.139075	0.351016	0
FDX1	11	1	0	0	1	0	0.139075	0.351016	0.693147
FKBP3	11	1	0	0	1	0	0.139075	0.351016	0.693147
FLJ37543	11	1	0	0	1	0	0.139075	0.351016	0.693147
GPR173	11	1	0	1	0	0	0.139075	0.351016	0
IL4I1	11	1	0	0	1	1	0.139075	0.351016	0
LMLN	11	1	0	0	1	0	0.139075	0.351016	0.693147
LOC63930	11	1	0	0	1	1	0.139075	0.351016	0
LSM7	11	1	0	0	1	0	0.139075	0.351016	0.693147
MGRN1	11	1	0	0	1	0	0.139075	0.351016	0.693147
NCRNA00265	11	1	0	0	1	0	0.139075	0.351016	0.693147
NUP62	11	1	0	0	1	1	0.139075	0.351016	0
ODF3B	11	1	1	0	0	0	0.139075	0.351016	0
P2RX5	11	1	0	0	1	1	0.139075	0.351016	0
PLB1	11	1	0	0	1	0	0.139075	0.351016	0.693147
PMS1	11	1	0	0	1	1	0.139075	0.351016	0
PNRC1	11	1	0	1	0	0	0.139075	0.351016	0
PPEF1	11	1	0	0	1	0	0.139075	0.351016	0.693147
RBM4B	11	1	0	0	1	0	0.139075	0.351016	0.693147
RFX7	11	1	0	0	1	0	0.139075	0.351016	0.693147
SDCCAG3	11	1	0	1	0	0	0.139075	0.351016	0
SOCS4	11	1	0	0	1	0	0.139075	0.351016	0.693147
SRRM1	11	1	1	0	0	0	0.139075	0.351016	0
TGFBR1	11	1	0	0	1	0	0.139075	0.351016	0.693147
TMED5	11	1	0	0	1	0	0.139075	0.351016	0.693147
TYSND1	11	1	0	1	0	0	0.139075	0.351016	0
USP19	11	1	0	0	1	1	0.139075	0.351016	0
ZNF828	11	1	1	0	0	0	0.139075	0.351016	0
NCOA2	101	3	0	0	3	1	0.139559	0.351658	2.07944
TANC2	866	15	0	0	15	9	0.13971	0.351658	3.44133
HMOX2	51	2	0	0	2	0	0.140382	0.352386	1.74126
RTKN2	51	2	1	0	1	0	0.140382	0.352386	0.693147
OTX2OS1	467	9	0	0	9	3	0.14186	0.354219	4.87643
COL19A1	102	3	0	0	3	0	0.14242	0.354219	2.77259
SGIP1	52	2	0	0	2	0	0.144641	0.354219	1.74126
MTMR3	159	4	0	0	4	3	0.145724	0.354219	0.96441
SCAPER	160	4	0	1	3	3	0.148	0.354219	0
MSI2	104	3	0	0	3	2	0.148199	0.354219	1.03133
FHOD3	53	2	0	0	2	0	0.148928	0.354219	1.74126
KLF7	53	2	0	0	2	0	0.148928	0.354219	1.74126
PRMT3	53	2	0	0	2	0	0.148928	0.354219	1.74126
ACBD6	12	1	0	0	1	0	0.149751	0.354219	0.693147
AIMP1	12	1	0	1	0	0	0.149751	0.354219	0
ASXL2	12	1	0	0	1	0	0.149751	0.354219	0.693147
C10orf28	12	1	0	0	1	1	0.149751	0.354219	0
C1orf83	12	1	1	0	0	0	0.149751	0.354219	0
C8orf58	12	1	1	0	0	0	0.149751	0.354219	0
CBFB	12	1	0	0	1	0	0.149751	0.354219	0.693147
CDC14B	12	1	0	0	1	0	0.149751	0.354219	0.693147
CDC42SE1	12	1	0	0	1	0	0.149751	0.354219	0.693147
CERK	12	1	0	0	1	0	0.149751	0.354219	0.693147
CHPT1	12	1	0	1	0	0	0.149751	0.354219	0
DPH5	12	1	0	0	1	1	0.149751	0.354219	0
EBP	12	1	0	0	1	0	0.149751	0.354219	0.693147
EIF2C4	12	1	0	0	1	0	0.149751	0.354219	0.693147
FAM107B	12	1	0	0	1	0	0.149751	0.354219	0.693147
GAA	12	1	0	0	1	0	0.149751	0.354219	0.693147
GPCPD1	12	1	0	0	1	0	0.149751	0.354219	0.693147
IARS	12	1	0	0	1	1	0.149751	0.354219	0
KIAA0174	12	1	0	0	1	0	0.149751	0.354219	0.693147
KIF1A	12	1	0	0	1	1	0.149751	0.354219	0
LRCH2	12	1	0	0	1	0	0.149751	0.354219	0.693147
MAP4K5	12	1	0	0	1	0	0.149751	0.354219	0.693147
NIPAL1	12	1	0	0	1	0	0.149751	0.354219	0.693147
NIPAL3	12	1	0	0	1	0	0.149751	0.354219	0.693147
PC	12	1	0	0	1	0	0.149751	0.354219	0.693147
RNF144A	12	1	0	0	1	1	0.149751	0.354219	0
SFRS9	12	1	0	0	1	0	0.149751	0.354219	0.693147
SIK2	12	1	0	0	1	0	0.149751	0.354219	0.693147
SP4	12	1	0	0	1	0	0.149751	0.354219	0.693147
ST7	12	1	0	0	1	0	0.149751	0.354219	0.693147
SUFU	12	1	0	0	1	0	0.149751	0.354219	0.693147
TRIM37	12	1	0	0	1	0	0.149751	0.354219	0.693147
TSPAN3	12	1	0	0	1	0	0.149751	0.354219	0.693147
WDR90	12	1	0	0	1	0	0.149751	0.354219	0.693147
WIZ	12	1	0	0	1	0	0.149751	0.354219	0.693147
ZNF787	12	1	0	0	1	0	0.149751	0.354219	0.693147
PLCB1	105	3	1	0	2	2	0.151117	0.356748	0
HCK	54	2	0	0	2	2	0.15324	0.356748	0
TXNRD1	54	2	0	0	2	0	0.15324	0.356748	1.74126
AK3	13	1	0	0	1	1	0.160295	0.356748	0
ALKBH2	13	1	0	0	1	0	0.160295	0.356748	0.693147
ARID1A	13	1	0	0	1	0	0.160295	0.356748	0.693147
C12orf23	13	1	1	0	0	0	0.160295	0.356748	0
C15orf34	13	1	0	1	0	0	0.160295	0.356748	0
C17orf89	13	1	0	0	1	0	0.160295	0.356748	0.693147
C1orf216	13	1	0	0	1	0	0.160295	0.356748	0.693147
CIC	13	1	0	0	1	0	0.160295	0.356748	0.693147
CNNM4	13	1	0	1	0	0	0.160295	0.356748	0
DUSP9	13	1	0	0	1	0	0.160295	0.356748	0.693147
FKBP9	13	1	0	0	1	0	0.160295	0.356748	0.693147
GABPB2	13	1	0	0	1	0	0.160295	0.356748	0.693147
GPR107	13	1	1	0	0	0	0.160295	0.356748	0
GSK3B	13	1	0	0	1	0	0.160295	0.356748	0.693147
HOXC8	13	1	1	0	0	0	0.160295	0.356748	0
LSM4	13	1	0	0	1	0	0.160295	0.356748	0.693147
LYSMD2	13	1	0	0	1	0	0.160295	0.356748	0.693147
MED12L	13	1	0	0	1	0	0.160295	0.356748	0.693147
MERTK	13	1	0	0	1	0	0.160295	0.356748	0.693147
MRPL2	13	1	1	0	0	0	0.160295	0.356748	0
NFATC4	13	1	0	1	0	0	0.160295	0.356748	0
NPAS1	13	1	0	0	1	0	0.160295	0.356748	0.693147
PFN4	13	1	0	0	1	0	0.160295	0.356748	0.693147
POFUT1	13	1	0	0	1	0	0.160295	0.356748	0.693147
PRDM15	13	1	0	0	1	0	0.160295	0.356748	0.693147
PSPC1	13	1	0	0	1	0	0.160295	0.356748	0.693147
PTER	13	1	0	0	1	0	0.160295	0.356748	0.693147
RAGE	13	1	0	0	1	0	0.160295	0.356748	0.693147
RUNX3	13	1	0	0	1	0	0.160295	0.356748	0.693147
SLBP	13	1	0	1	0	0	0.160295	0.356748	0
SLC19A1	13	1	0	0	1	0	0.160295	0.356748	0.693147
SVOPL	13	1	0	0	1	0	0.160295	0.356748	0.693147
SYTL4	13	1	1	0	0	0	0.160295	0.356748	0
TANC1	13	1	0	0	1	0	0.160295	0.356748	0.693147
TECPR2	13	1	0	0	1	1	0.160295	0.356748	0
THAP7	13	1	1	0	0	0	0.160295	0.356748	0
TNFSF11	13	1	0	0	1	0	0.160295	0.356748	0.693147
TOX2	13	1	0	0	1	0	0.160295	0.356748	0.693147
UBE2V2	13	1	0	0	1	0	0.160295	0.356748	0.693147
UBP1	13	1	0	0	1	0	0.160295	0.356748	0.693147
USP13	13	1	0	0	1	1	0.160295	0.356748	0
USP46	13	1	0	0	1	0	0.160295	0.356748	0.693147
WDFY2	13	1	0	0	1	0	0.160295	0.356748	0.693147
WDR25	13	1	0	0	1	0	0.160295	0.356748	0.693147
WNT10B	13	1	0	0	1	0	0.160295	0.356748	0.693147
ZNF576	13	1	1	0	0	0	0.160295	0.356748	0
C11orf30	56	2	0	0	2	0	0.161933	0.358664	1.74126
C1orf213	56	2	0	2	0	0	0.161933	0.358664	0
C9orf86	56	2	0	1	1	1	0.161933	0.358664	0
RAPGEF4	56	2	0	0	2	1	0.161933	0.358664	1.04811
CLIP1	57	2	0	0	2	0	0.166313	0.362863	1.74126
ASXL1	14	1	0	0	1	0	0.170708	0.362863	0.693147
C11orf59	14	1	0	0	1	0	0.170708	0.362863	0.693147
C12orf66	14	1	0	0	1	0	0.170708	0.362863	0.693147
C12orf72	14	1	0	0	1	0	0.170708	0.362863	0.693147
C3orf23	14	1	0	0	1	0	0.170708	0.362863	0.693147
C5orf32	14	1	0	0	1	0	0.170708	0.362863	0.693147
C9orf69	14	1	0	0	1	0	0.170708	0.362863	0.693147
CHST12	14	1	0	0	1	0	0.170708	0.362863	0.693147
CNPY1	14	1	0	0	1	0	0.170708	0.362863	0.693147
DCP1B	14	1	0	0	1	0	0.170708	0.362863	0.693147
DOK6	14	1	0	0	1	0	0.170708	0.362863	0.693147
FAM120AOS	14	1	0	1	0	0	0.170708	0.362863	0
FHL2	14	1	0	0	1	1	0.170708	0.362863	0
FOXO1	14	1	0	0	1	0	0.170708	0.362863	0.693147
GSTA4	14	1	0	0	1	0	0.170708	0.362863	0.693147
HDAC5	14	1	0	1	0	0	0.170708	0.362863	0
IFNGR2	14	1	1	0	0	0	0.170708	0.362863	0
JMY	14	1	0	0	1	0	0.170708	0.362863	0.693147
KLF10	14	1	0	0	1	0	0.170708	0.362863	0.693147
LDB3	14	1	0	0	1	1	0.170708	0.362863	0
LRRC69	14	1	0	0	1	1	0.170708	0.362863	0
MORC3	14	1	0	0	1	0	0.170708	0.362863	0.693147
NAGLU	14	1	0	1	0	0	0.170708	0.362863	0
PPFIA3	14	1	1	0	0	0	0.170708	0.362863	0
SLC12A4	14	1	0	0	1	0	0.170708	0.362863	0.693147
SNRNP200	14	1	0	0	1	0	0.170708	0.362863	0.693147
SPIN4	14	1	0	1	0	0	0.170708	0.362863	0
TBK1	14	1	0	0	1	1	0.170708	0.362863	0
TMLHE	14	1	0	0	1	0	0.170708	0.362863	0.693147
TRIM47	14	1	0	0	1	0	0.170708	0.362863	0.693147
TRIT1	14	1	0	0	1	0	0.170708	0.362863	0.693147
TSHZ3	14	1	0	0	1	0	0.170708	0.362863	0.693147
ZNF121	14	1	0	0	1	0	0.170708	0.362863	0.693147
RABGAP1	58	2	0	0	2	1	0.170713	0.362863	1.04811
GRID2	59	2	0	0	2	1	0.175132	0.371401	1.04811
HCRTR2	59	2	0	0	2	0	0.175132	0.371401	1.74126
AARSD1	15	1	1	0	0	0	0.180992	0.37269	0
ADPGK	15	1	0	0	1	0	0.180992	0.37269	0.693147
BCORL1	15	1	0	0	1	0	0.180992	0.37269	0.693147
C11orf54	15	1	0	0	1	0	0.180992	0.37269	0.693147
C14orf128	15	1	0	1	0	0	0.180992	0.37269	0
C5orf28	15	1	0	0	1	0	0.180992	0.37269	0.693147
CAMTA2	15	1	0	0	1	1	0.180992	0.37269	0
CCDC81	15	1	0	0	1	0	0.180992	0.37269	0.693147
CHRNB3	15	1	0	0	1	0	0.180992	0.37269	0.693147
KCTD15	15	1	0	0	1	0	0.180992	0.37269	0.693147
KIAA2018	15	1	0	0	1	0	0.180992	0.37269	0.693147
LAPTM4B	15	1	0	0	1	0	0.180992	0.37269	0.693147
LOC728723	15	1	1	0	0	0	0.180992	0.37269	0
LRRC14	15	1	0	1	0	0	0.180992	0.37269	0
LZTR1	15	1	0	0	1	0	0.180992	0.37269	0.693147
MDK	15	1	1	0	0	0	0.180992	0.37269	0
NAPEPLD	15	1	0	0	1	0	0.180992	0.37269	0.693147
PCNX	15	1	0	0	1	0	0.180992	0.37269	0.693147
PHC3	15	1	0	0	1	1	0.180992	0.37269	0
PRKD2	15	1	0	0	1	0	0.180992	0.37269	0.693147
PROX1	15	1	0	0	1	0	0.180992	0.37269	0.693147
PSMB5	15	1	1	0	0	0	0.180992	0.37269	0
RSU1	15	1	0	0	1	0	0.180992	0.37269	0.693147
S100A10	15	1	1	0	0	0	0.180992	0.37269	0
TUBB6	15	1	0	0	1	0	0.180992	0.37269	0.693147
VEGFC	15	1	0	0	1	1	0.180992	0.37269	0
GPC5	61	2	0	0	2	0	0.184022	0.377994	1.74126
WDR7	61	2	0	0	2	0	0.184022	0.377994	1.74126
ESRRG	116	3	0	0	3	2	0.184322	0.377994	1.03133
BSG	62	2	0	0	2	2	0.188492	0.377994	0
IGF2BP1	62	2	1	1	0	0	0.188492	0.377994	0
KDM4C	118	3	0	0	3	2	0.190554	0.377994	1.03133
ARIH1	16	1	0	0	1	0	0.191148	0.377994	0.693147
CLOCK	16	1	0	0	1	0	0.191148	0.377994	0.693147
CPSF2	16	1	0	1	0	0	0.191148	0.377994	0
EIF2B1	16	1	0	0	1	0	0.191148	0.377994	0.693147
FAM104B	16	1	0	0	1	0	0.191148	0.377994	0.693147
GRB10	16	1	0	0	1	0	0.191148	0.377994	0.693147
HOMER2	16	1	0	0	1	0	0.191148	0.377994	0.693147
HSBP1L1	16	1	0	0	1	1	0.191148	0.377994	0
IL17RE	16	1	0	1	0	0	0.191148	0.377994	0
IRF2	16	1	0	0	1	0	0.191148	0.377994	0.693147
KDELC2	16	1	0	0	1	0	0.191148	0.377994	0.693147
LRP2BP	16	1	0	1	0	0	0.191148	0.377994	0
LRP4	16	1	0	0	1	1	0.191148	0.377994	0
MAGEC3	16	1	0	0	1	0	0.191148	0.377994	0.693147
MLLT6	16	1	0	0	1	0	0.191148	0.377994	0.693147
MMAB	16	1	0	0	1	0	0.191148	0.377994	0.693147
MMP16	16	1	0	0	1	1	0.191148	0.377994	0
MPI	16	1	0	0	1	0	0.191148	0.377994	0.693147
MYL6B	16	1	1	0	0	0	0.191148	0.377994	0
NT5C2	16	1	0	0	1	0	0.191148	0.377994	0.693147
PREP	16	1	0	0	1	0	0.191148	0.377994	0.693147
PRKCE	16	1	0	0	1	0	0.191148	0.377994	0.693147
RASA2	16	1	0	0	1	0	0.191148	0.377994	0.693147
RPAIN	16	1	0	0	1	0	0.191148	0.377994	0.693147
SDF4	16	1	0	0	1	1	0.191148	0.377994	0
SDHAF2	16	1	0	0	1	1	0.191148	0.377994	0
SVIL	16	1	1	0	0	0	0.191148	0.377994	0
TBC1D4	16	1	0	1	0	0	0.191148	0.377994	0
UBE2J1	16	1	0	1	0	1	0.191148	0.377994	-0.693147
VPS54	16	1	0	0	1	0	0.191148	0.377994	0.693147
WEE1	16	1	0	1	0	0	0.191148	0.377994	0
AAK1	17	1	1	0	0	1	0.201179	0.386238	-0.693147
ATRNL1	17	1	0	0	1	0	0.201179	0.386238	0.693147
C18orf55	17	1	0	0	1	0	0.201179	0.386238	0.693147
CDH22	17	1	0	0	1	0	0.201179	0.386238	0.693147
COMMD8	17	1	0	0	1	0	0.201179	0.386238	0.693147
FAM55C	17	1	1	0	0	1	0.201179	0.386238	-0.693147
IPP	17	1	0	0	1	0	0.201179	0.386238	0.693147
JAG2	17	1	0	0	1	0	0.201179	0.386238	0.693147
KCNMA1	17	1	0	0	1	0	0.201179	0.386238	0.693147
KIF23	17	1	0	0	1	0	0.201179	0.386238	0.693147
MEIG1	17	1	1	0	0	1	0.201179	0.386238	-0.693147
NDUFB8	17	1	0	0	1	0	0.201179	0.386238	0.693147
NES	17	1	0	0	1	0	0.201179	0.386238	0.693147
PAPD4	17	1	0	0	1	0	0.201179	0.386238	0.693147
PAPOLA	17	1	1	0	0	0	0.201179	0.386238	0
PHF23	17	1	0	0	1	0	0.201179	0.386238	0.693147
PPIB	17	1	0	0	1	0	0.201179	0.386238	0.693147
REL	17	1	0	0	1	0	0.201179	0.386238	0.693147
SERPINB6	17	1	0	1	0	0	0.201179	0.386238	0
SFT2D3	17	1	0	1	0	0	0.201179	0.386238	0
SMYD2	17	1	0	0	1	0	0.201179	0.386238	0.693147
STXBP5	17	1	0	0	1	1	0.201179	0.386238	0
TGFBR2	17	1	0	0	1	0	0.201179	0.386238	0.693147
TGFBR3	17	1	0	0	1	2	0.201179	0.386238	-1.04811
TOMM40L	17	1	0	0	1	0	0.201179	0.386238	0.693147
TSEN2	17	1	0	0	1	0	0.201179	0.386238	0.693147
ZBTB8A	17	1	0	0	1	1	0.201179	0.386238	0
ZNF524	17	1	0	0	1	1	0.201179	0.386238	0
HTR2C	65	2	0	0	2	0	0.201983	0.386977	1.74126
LRRTM3	65	2	1	0	1	1	0.201983	0.386977	0
UNK	122	3	0	0	3	3	0.203173	0.388853	0
PDE4DIP	66	2	1	0	1	0	0.206505	0.391802	0.693147
TRAF3	66	2	0	0	2	0	0.206505	0.391802	1.74126
CDH2	67	2	1	0	1	2	0.211037	0.391802	-1.04811
ANLN	18	1	0	0	1	1	0.211085	0.391802	0
BAHCC1	18	1	0	0	1	0	0.211085	0.391802	0.693147
C9orf102	18	1	0	0	1	0	0.211085	0.391802	0.693147
CC2D2A	18	1	0	0	1	0	0.211085	0.391802	0.693147
CHEK1	18	1	0	1	0	0	0.211085	0.391802	0
CLK3	18	1	0	0	1	0	0.211085	0.391802	0.693147
DDX42	18	1	0	0	1	0	0.211085	0.391802	0.693147
ELAVL2	18	1	0	0	1	0	0.211085	0.391802	0.693147
FAT3	18	1	0	0	1	0	0.211085	0.391802	0.693147
IRAK1	18	1	0	0	1	0	0.211085	0.391802	0.693147
MAP2K1	18	1	0	0	1	0	0.211085	0.391802	0.693147
MTFMT	18	1	0	0	1	1	0.211085	0.391802	0
MYLPF	18	1	0	1	0	0	0.211085	0.391802	0
RAB11A	18	1	0	0	1	0	0.211085	0.391802	0.693147
RAB26	18	1	0	0	1	0	0.211085	0.391802	0.693147
RPS19	18	1	0	0	1	0	0.211085	0.391802	0.693147
SCAF1	18	1	0	0	1	1	0.211085	0.391802	0
SLC16A1	18	1	0	1	0	0	0.211085	0.391802	0
SLC16A10	18	1	0	0	1	0	0.211085	0.391802	0.693147
SLC9A7	18	1	0	0	1	2	0.211085	0.391802	-1.04811
SYNJ1	18	1	0	0	1	0	0.211085	0.391802	0.693147
TCEA3	18	1	0	0	1	0	0.211085	0.391802	0.693147
TMEM68	18	1	0	0	1	0	0.211085	0.391802	0.693147
UNKL	18	1	0	0	1	0	0.211085	0.391802	0.693147
XKR3	18	1	0	0	1	0	0.211085	0.391802	0.693147
YTHDF3	18	1	0	0	1	0	0.211085	0.391802	0.693147
ZNF507	18	1	0	0	1	0	0.211085	0.391802	0.693147
DSCR3	68	2	0	0	2	2	0.215579	0.399741	0
FAM186A	69	2	0	0	2	0	0.220129	0.401084	1.74126
ATP1A1	19	1	1	0	0	0	0.220868	0.401084	0
CDC73	19	1	0	0	1	1	0.220868	0.401084	0
CHD7	19	1	0	0	1	0	0.220868	0.401084	0.693147
DTNBP1	19	1	0	0	1	0	0.220868	0.401084	0.693147
HHEX	19	1	0	0	1	1	0.220868	0.401084	0
HIPK2	19	1	0	0	1	0	0.220868	0.401084	0.693147
HOXA10	19	1	0	1	0	0	0.220868	0.401084	0
KLHL24	19	1	0	0	1	0	0.220868	0.401084	0.693147
LOC253724	19	1	0	0	1	1	0.220868	0.401084	0
NRM	19	1	0	0	1	0	0.220868	0.401084	0.693147
PPP1R13L	19	1	0	0	1	0	0.220868	0.401084	0.693147
RAF1	19	1	0	0	1	0	0.220868	0.401084	0.693147
RASSF1	19	1	0	1	0	0	0.220868	0.401084	0
SENP3	19	1	0	1	0	0	0.220868	0.401084	0
SFRS8	19	1	0	0	1	0	0.220868	0.401084	0.693147
TMEM138	19	1	0	0	1	0	0.220868	0.401084	0.693147
USP18	19	1	0	0	1	0	0.220868	0.401084	0.693147
USP22	19	1	0	0	1	0	0.220868	0.401084	0.693147
WDR45	19	1	0	0	1	0	0.220868	0.401084	0.693147
ZC3H10	19	1	0	0	1	0	0.220868	0.401084	0.693147
PCYT1B	128	3	0	0	3	1	0.222442	0.403545	2.07944
MARCH1	192	4	0	0	4	3	0.22703	0.407401	0.96441
NAV1	71	2	0	0	2	1	0.229252	0.407401	1.04811
EPHA3	193	4	0	0	4	1	0.229659	0.407401	3.04385
ACSS2	20	1	0	0	1	0	0.230529	0.407401	0.693147
ADAMTS13	20	1	0	0	1	1	0.230529	0.407401	0
ADRA1A	20	1	0	0	1	0	0.230529	0.407401	0.693147
C20orf26	20	1	0	0	1	0	0.230529	0.407401	0.693147
CDK5RAP3	20	1	0	0	1	0	0.230529	0.407401	0.693147
COL24A1	20	1	0	0	1	0	0.230529	0.407401	0.693147
ITSN2	20	1	0	0	1	0	0.230529	0.407401	0.693147
LOC100128191	20	1	1	0	0	0	0.230529	0.407401	0
MBIP	20	1	0	0	1	0	0.230529	0.407401	0.693147
MIR548H2	20	1	0	0	1	0	0.230529	0.407401	0.693147
NCRNA00167	20	1	1	0	0	0	0.230529	0.407401	0
PSMG2	20	1	0	0	1	0	0.230529	0.407401	0.693147
PTPN12	20	1	1	0	0	0	0.230529	0.407401	0
RBBP8	20	1	0	0	1	0	0.230529	0.407401	0.693147
RPRD1B	20	1	0	0	1	0	0.230529	0.407401	0.693147
SATB1	20	1	1	0	0	0	0.230529	0.407401	0
SYNGAP1	20	1	0	0	1	0	0.230529	0.407401	0.693147
TMEM222	20	1	0	0	1	0	0.230529	0.407401	0.693147
TMUB1	20	1	1	0	0	0	0.230529	0.407401	0
UCHL5	20	1	0	0	1	0	0.230529	0.407401	0.693147
VARS2	20	1	0	0	1	0	0.230529	0.407401	0.693147
WNK3	20	1	1	0	0	0	0.230529	0.407401	0
ZNF609	20	1	0	0	1	1	0.230529	0.407401	0
ZNF839	20	1	0	0	1	1	0.230529	0.407401	0
C19orf2	72	2	0	0	2	1	0.233823	0.412432	1.04811
TRIM54	72	2	1	0	1	3	0.233823	0.412432	-2.07944
FBXL7	196	4	0	0	4	4	0.23759	0.413182	0
C20orf72	73	2	0	1	1	0	0.238399	0.413182	0.693147
FLJ43663	133	3	0	0	3	0	0.238761	0.413182	2.77259
ABCB1	21	1	0	0	1	2	0.240071	0.413182	-1.04811
AGTR1	21	1	0	1	0	0	0.240071	0.413182	0
ATP2B4	21	1	0	0	1	0	0.240071	0.413182	0.693147
C20orf194	21	1	0	0	1	0	0.240071	0.413182	0.693147
C21orf33	21	1	0	0	1	0	0.240071	0.413182	0.693147
C5orf36	21	1	0	0	1	0	0.240071	0.413182	0.693147
DDX28	21	1	1	0	0	0	0.240071	0.413182	0
EFNB2	21	1	0	0	1	0	0.240071	0.413182	0.693147
EMP3	21	1	0	0	1	0	0.240071	0.413182	0.693147
GAB1	21	1	0	0	1	0	0.240071	0.413182	0.693147
GALNT1	21	1	0	0	1	0	0.240071	0.413182	0.693147
HOXC4	21	1	1	0	0	0	0.240071	0.413182	0
HOXC5	21	1	1	0	0	0	0.240071	0.413182	0
HOXC6	21	1	1	0	0	0	0.240071	0.413182	0
LOC100131193	21	1	0	0	1	0	0.240071	0.413182	0.693147
MACF1	21	1	0	0	1	1	0.240071	0.413182	0
MED24	21	1	0	1	0	0	0.240071	0.413182	0
POLDIP3	21	1	0	0	1	0	0.240071	0.413182	0.693147
RAB31	21	1	0	0	1	0	0.240071	0.413182	0.693147
SLC39A10	21	1	0	0	1	0	0.240071	0.413182	0.693147
WIPF2	21	1	0	0	1	0	0.240071	0.413182	0.693147
YTHDF2	21	1	0	0	1	0	0.240071	0.413182	0.693147
ZNF236	21	1	0	1	0	1	0.240071	0.413182	-0.693147
DYRK1A	74	2	1	0	1	0	0.242979	0.417798	0.693147
LRRC1	265	5	0	1	4	4	0.245613	0.419998	0
GPHN	75	2	0	0	2	0	0.247563	0.419998	1.74126
NFIB	75	2	0	0	2	1	0.247563	0.419998	1.04811
ARSB	22	1	0	1	0	0	0.249495	0.419998	0
CDCA7	22	1	0	0	1	0	0.249495	0.419998	0.693147
DERA	22	1	0	0	1	0	0.249495	0.419998	0.693147
EEFSEC	22	1	0	0	1	0	0.249495	0.419998	0.693147
FDFT1	22	1	0	0	1	1	0.249495	0.419998	0
FNDC3B	22	1	0	0	1	1	0.249495	0.419998	0
FZD3	22	1	0	0	1	0	0.249495	0.419998	0.693147
HARBI1	22	1	0	0	1	0	0.249495	0.419998	0.693147
HIAT1	22	1	0	0	1	0	0.249495	0.419998	0.693147
IQGAP2	22	1	0	0	1	0	0.249495	0.419998	0.693147
MTDH	22	1	0	0	1	0	0.249495	0.419998	0.693147
NME1	22	1	0	0	1	1	0.249495	0.419998	0
RAD52	22	1	0	0	1	0	0.249495	0.419998	0.693147
SIM2	22	1	1	0	0	0	0.249495	0.419998	0
SLC25A17	22	1	0	0	1	0	0.249495	0.419998	0.693147
SMEK1	22	1	0	0	1	1	0.249495	0.419998	0
SPAG16	22	1	0	0	1	0	0.249495	0.419998	0.693147
ST6GAL1	22	1	0	0	1	1	0.249495	0.419998	0
STXBP4	22	1	0	0	1	1	0.249495	0.419998	0
TXLNG	22	1	0	1	0	0	0.249495	0.419998	0
CACNB2	77	2	0	0	2	2	0.256738	0.424812	0
PALLD	77	2	0	0	2	2	0.256738	0.424812	0
MSRA	139	3	0	0	3	1	0.258592	0.424812	2.07944
ACAA2	23	1	0	0	1	0	0.258801	0.424812	0.693147
AEN	23	1	0	0	1	1	0.258801	0.424812	0
ANKRD17	23	1	0	0	1	0	0.258801	0.424812	0.693147
C11orf1	23	1	1	0	0	1	0.258801	0.424812	-0.693147
CSRP3	23	1	0	0	1	0	0.258801	0.424812	0.693147
CTNNBL1	23	1	0	0	1	0	0.258801	0.424812	0.693147
DPPA4	23	1	0	0	1	1	0.258801	0.424812	0
EFCAB5	23	1	0	0	1	0	0.258801	0.424812	0.693147
EIF2AK3	23	1	0	0	1	0	0.258801	0.424812	0.693147
FAM174B	23	1	0	0	1	0	0.258801	0.424812	0.693147
FREM2	23	1	0	0	1	0	0.258801	0.424812	0.693147
GPATCH1	23	1	0	0	1	0	0.258801	0.424812	0.693147
GSS	23	1	0	0	1	0	0.258801	0.424812	0.693147
LEKR1	23	1	0	0	1	0	0.258801	0.424812	0.693147
LOC100130331	23	1	0	0	1	0	0.258801	0.424812	0.693147
MFF	23	1	0	0	1	0	0.258801	0.424812	0.693147
MYO19	23	1	1	0	0	0	0.258801	0.424812	0
MYO1E	23	1	0	0	1	0	0.258801	0.424812	0.693147
PGAP2	23	1	0	0	1	0	0.258801	0.424812	0.693147
PLEKHJ1	23	1	0	0	1	0	0.258801	0.424812	0.693147
RUNX1T1	23	1	0	0	1	0	0.258801	0.424812	0.693147
SALL3	23	1	0	0	1	0	0.258801	0.424812	0.693147
TBC1D19	23	1	0	0	1	0	0.258801	0.424812	0.693147
UNC13B	23	1	0	0	1	0	0.258801	0.424812	0.693147
UQCR11	23	1	0	0	1	0	0.258801	0.424812	0.693147
LRRC28	78	2	0	0	2	0	0.261328	0.428578	1.74126
BICD1	140	3	0	1	2	2	0.261919	0.429166	0
NMNAT2	79	2	0	0	2	0	0.265918	0.430702	1.74126
DACH2	207	4	0	0	4	6	0.267168	0.430702	-1.72586
ABLIM1	24	1	0	0	1	0	0.267992	0.430702	0.693147
ALB	24	1	0	0	1	0	0.267992	0.430702	0.693147
ANXA2	24	1	0	0	1	0	0.267992	0.430702	0.693147
BMPR1B	24	1	0	0	1	0	0.267992	0.430702	0.693147
C12orf75	24	1	0	0	1	0	0.267992	0.430702	0.693147
CIZ1	24	1	0	0	1	0	0.267992	0.430702	0.693147
CYB5D2	24	1	1	0	0	0	0.267992	0.430702	0
FADS1	24	1	0	0	1	0	0.267992	0.430702	0.693147
FANCI	24	1	0	0	1	0	0.267992	0.430702	0.693147
FERMT2	24	1	0	1	0	0	0.267992	0.430702	0
FNTB	24	1	0	0	1	1	0.267992	0.430702	0
JUNB	24	1	0	1	0	0	0.267992	0.430702	0
NECAB3	24	1	1	0	0	0	0.267992	0.430702	0
OSBPL3	24	1	0	0	1	0	0.267992	0.430702	0.693147
PGPEP1	24	1	1	0	0	0	0.267992	0.430702	0
PHF14	24	1	0	0	1	1	0.267992	0.430702	0
PTK7	24	1	0	0	1	1	0.267992	0.430702	0
SH3BP4	24	1	0	0	1	0	0.267992	0.430702	0.693147
SHISA5	24	1	0	0	1	0	0.267992	0.430702	0.693147
WWP2	24	1	0	0	1	0	0.267992	0.430702	0.693147
C9orf3	80	2	0	0	2	2	0.270508	0.433989	0
GNAO1	80	2	0	0	2	2	0.270508	0.433989	0
MAML2	144	3	0	0	3	2	0.275277	0.43804	1.03133
FOXP1	278	5	0	0	5	3	0.275867	0.43804	1.85904
C17orf91	25	1	0	1	0	1	0.277069	0.43804	-0.693147
DDX31	25	1	0	1	0	0	0.277069	0.43804	0
EXTL3	25	1	0	0	1	1	0.277069	0.43804	0
F10	25	1	0	0	1	0	0.277069	0.43804	0.693147
FAM126A	25	1	0	0	1	0	0.277069	0.43804	0.693147
FGGY	25	1	0	0	1	0	0.277069	0.43804	0.693147
GABRB1	25	1	0	0	1	0	0.277069	0.43804	0.693147
HDDC3	25	1	0	1	0	0	0.277069	0.43804	0
PHACTR4	25	1	0	0	1	1	0.277069	0.43804	0
PPRC1	25	1	0	1	0	0	0.277069	0.43804	0
PRMT7	25	1	0	0	1	1	0.277069	0.43804	0
SLC9A9	25	1	0	0	1	0	0.277069	0.43804	0.693147
SP3	25	1	1	0	0	0	0.277069	0.43804	0
TFAP2A	25	1	0	0	1	0	0.277069	0.43804	0.693147
ZFAT	25	1	0	0	1	0	0.277069	0.43804	0.693147
SLC26A7	82	2	0	0	2	3	0.279684	0.441795	-1.03133
GPM6A	83	2	0	0	2	1	0.284268	0.442729	1.04811
ABCA3	26	1	0	0	1	0	0.286034	0.442729	0.693147
ACBD5	26	1	0	0	1	0	0.286034	0.442729	0.693147
AHCY	26	1	0	0	1	1	0.286034	0.442729	0
ARHGAP42	26	1	0	0	1	0	0.286034	0.442729	0.693147
C2CD3	26	1	0	0	1	0	0.286034	0.442729	0.693147
C4orf21	26	1	0	0	1	0	0.286034	0.442729	0.693147
C7orf40	26	1	0	0	1	0	0.286034	0.442729	0.693147
CAB39L	26	1	0	0	1	0	0.286034	0.442729	0.693147
CDK13	26	1	1	0	0	0	0.286034	0.442729	0
ECHDC2	26	1	0	0	1	0	0.286034	0.442729	0.693147
EPS15	26	1	0	0	1	0	0.286034	0.442729	0.693147
HERPUD2	26	1	0	0	1	0	0.286034	0.442729	0.693147
HNRNPR	26	1	0	0	1	0	0.286034	0.442729	0.693147
IQCH	26	1	0	0	1	0	0.286034	0.442729	0.693147
LOC100289341	26	1	1	0	0	0	0.286034	0.442729	0
PABPN1	26	1	1	0	0	0	0.286034	0.442729	0
PAN2	26	1	1	0	0	0	0.286034	0.442729	0
PHF8	26	1	0	0	1	0	0.286034	0.442729	0.693147
PRTFDC1	26	1	0	0	1	0	0.286034	0.442729	0.693147
RPS6KC1	26	1	0	0	1	1	0.286034	0.442729	0
SNX25	26	1	0	0	1	0	0.286034	0.442729	0.693147
TRIP12	26	1	0	0	1	0	0.286034	0.442729	0.693147
ZNRF1	26	1	0	0	1	1	0.286034	0.442729	0
FGFR2	85	2	1	0	1	4	0.293429	0.449271	-3.04385
ABCC5	27	1	0	0	1	0	0.294887	0.449271	0.693147
AGPAT1	27	1	0	0	1	1	0.294887	0.449271	0
ANO6	27	1	0	0	1	0	0.294887	0.449271	0.693147
ARL3	27	1	0	0	1	2	0.294887	0.449271	-1.04811
C11orf82	27	1	0	0	1	1	0.294887	0.449271	0
C3orf59	27	1	0	0	1	0	0.294887	0.449271	0.693147
FDXACB1	27	1	0	1	0	0	0.294887	0.449271	0
JAG1	27	1	0	0	1	0	0.294887	0.449271	0.693147
MARCH3	27	1	0	0	1	0	0.294887	0.449271	0.693147
MYCL1	27	1	0	1	0	0	0.294887	0.449271	0
PGBD3	27	1	0	0	1	1	0.294887	0.449271	0
PKNOX1	27	1	0	0	1	1	0.294887	0.449271	0
PLEKHA7	27	1	0	0	1	0	0.294887	0.449271	0.693147
PPM1D	27	1	1	0	0	0	0.294887	0.449271	0
PRRT2	27	1	0	1	0	0	0.294887	0.449271	0
RABEP1	27	1	0	0	1	0	0.294887	0.449271	0.693147
RASIP1	27	1	0	0	1	0	0.294887	0.449271	0.693147
TMEM107	27	1	1	0	0	0	0.294887	0.449271	0
SH3KBP1	150	3	0	0	3	2	0.29543	0.449727	1.03133
ODZ3	86	2	0	1	1	1	0.298003	0.453269	0
ATRX	28	1	0	1	0	0	0.303631	0.454338	0
BACH2	28	1	0	0	1	0	0.303631	0.454338	0.693147
CHIC1	28	1	1	0	0	1	0.303631	0.454338	-0.693147
CSAD	28	1	0	0	1	0	0.303631	0.454338	0.693147
DEPDC5	28	1	0	0	1	0	0.303631	0.454338	0.693147
DTNA	28	1	0	0	1	1	0.303631	0.454338	0
EFCAB2	28	1	0	0	1	0	0.303631	0.454338	0.693147
FSIP1	28	1	0	0	1	0	0.303631	0.454338	0.693147
GNAL	28	1	0	0	1	0	0.303631	0.454338	0.693147
GRAMD1C	28	1	1	0	0	0	0.303631	0.454338	0
HMGA1	28	1	0	0	1	0	0.303631	0.454338	0.693147
HRASLS5	28	1	0	0	1	0	0.303631	0.454338	0.693147
IPCEF1	28	1	0	0	1	0	0.303631	0.454338	0.693147
LGSN	28	1	0	0	1	0	0.303631	0.454338	0.693147
NAV2	28	1	0	0	1	0	0.303631	0.454338	0.693147
NMRAL1	28	1	0	1	0	0	0.303631	0.454338	0
RRAGD	28	1	0	0	1	1	0.303631	0.454338	0
TMEM17	28	1	0	0	1	0	0.303631	0.454338	0.693147
UHRF1	28	1	0	0	1	0	0.303631	0.454338	0.693147
WHSC1L1	28	1	0	0	1	0	0.303631	0.454338	0.693147
UBE2Q2	88	2	0	0	2	0	0.307135	0.45921	1.74126
TCF12	154	3	0	0	3	5	0.308915	0.461496	-1.85904
CORO1C	89	2	0	0	2	1	0.311693	0.462384	1.04811
BAZ1A	29	1	0	0	1	0	0.312266	0.462384	0.693147
C12orf61	29	1	0	1	0	0	0.312266	0.462384	0
DENND1A	29	1	0	0	1	0	0.312266	0.462384	0.693147
EML2	29	1	0	1	0	0	0.312266	0.462384	0
KIAA0101	29	1	0	0	1	1	0.312266	0.462384	0
MAZ	29	1	1	0	0	0	0.312266	0.462384	0
NIPBL	29	1	0	0	1	1	0.312266	0.462384	0
PDZRN4	29	1	0	0	1	0	0.312266	0.462384	0.693147
TRAT1	29	1	0	0	1	0	0.312266	0.462384	0.693147
UQCC	29	1	1	0	0	0	0.312266	0.462384	0
STAU2	156	3	1	0	2	2	0.315665	0.466402	0
SSH2	90	2	0	0	2	0	0.316245	0.466402	1.74126
COL4A3	91	2	0	0	2	2	0.320789	0.466402	0
AP2B1	30	1	0	0	1	0	0.320794	0.466402	0.693147
ATF7	30	1	0	0	1	0	0.320794	0.466402	0.693147
CRTAP	30	1	0	0	1	1	0.320794	0.466402	0
GRIA2	30	1	0	0	1	0	0.320794	0.466402	0.693147
LATS1	30	1	0	0	1	0	0.320794	0.466402	0.693147
LOC147727	30	1	0	1	0	0	0.320794	0.466402	0
MARK4	30	1	0	0	1	1	0.320794	0.466402	0
MIAT	30	1	0	0	1	0	0.320794	0.466402	0.693147
MYO1C	30	1	0	1	0	0	0.320794	0.466402	0
NCRNA00263	30	1	1	0	0	0	0.320794	0.466402	0
NKAIN2	30	1	0	0	1	2	0.320794	0.466402	-1.04811
NME1-NME2	30	1	0	0	1	1	0.320794	0.466402	0
PDK3	30	1	1	0	0	0	0.320794	0.466402	0
PHF7	30	1	1	0	0	0	0.320794	0.466402	0
PPHLN1	30	1	1	0	0	0	0.320794	0.466402	0
SBNO2	30	1	0	0	1	0	0.320794	0.466402	0.693147
SPRYD4	30	1	0	1	0	0	0.320794	0.466402	0
THAP4	30	1	0	0	1	0	0.320794	0.466402	0.693147
TIPIN	30	1	0	0	1	0	0.320794	0.466402	0.693147
TTC35	30	1	0	0	1	0	0.320794	0.466402	0.693147
MYO3B	160	3	0	0	3	0	0.32917	0.472687	2.77259
TRIM9	160	3	0	0	3	1	0.32917	0.472687	2.07944
BMPR2	31	1	0	1	0	1	0.329216	0.472687	-0.693147
CA11	31	1	1	0	0	1	0.329216	0.472687	-0.693147
DCUN1D3	31	1	0	0	1	0	0.329216	0.472687	0.693147
DOT1L	31	1	0	0	1	1	0.329216	0.472687	0
ETFA	31	1	0	0	1	0	0.329216	0.472687	0.693147
GPRC5B	31	1	1	0	0	0	0.329216	0.472687	0
GSN	31	1	0	0	1	0	0.329216	0.472687	0.693147
IQCJ	31	1	0	0	1	0	0.329216	0.472687	0.693147
NBR1	31	1	1	0	0	0	0.329216	0.472687	0
RCHY1	31	1	0	0	1	0	0.329216	0.472687	0.693147
SCHIP1	31	1	0	0	1	1	0.329216	0.472687	0
SERGEF	31	1	0	0	1	0	0.329216	0.472687	0.693147
SFRS13A	31	1	0	0	1	0	0.329216	0.472687	0.693147
SLC29A2	31	1	1	0	0	0	0.329216	0.472687	0
MRPS28	93	2	0	0	2	1	0.329854	0.472867	1.04811
ZNF804B	93	2	0	1	1	2	0.329854	0.472867	-1.04811
DNAI1	94	2	0	0	2	1	0.334374	0.478302	1.04811
CLSTN1	32	1	0	0	1	0	0.337533	0.478302	0.693147
GGNBP2	32	1	1	0	0	0	0.337533	0.478302	0
GNB1	32	1	0	0	1	0	0.337533	0.478302	0.693147
INTU	32	1	0	0	1	0	0.337533	0.478302	0.693147
MAD2L1BP	32	1	0	0	1	0	0.337533	0.478302	0.693147
PIK3R2	32	1	0	0	1	0	0.337533	0.478302	0.693147
PTPN3	32	1	0	0	1	1	0.337533	0.478302	0
SGCE	32	1	0	0	1	0	0.337533	0.478302	0.693147
SPPL2A	32	1	0	0	1	0	0.337533	0.478302	0.693147
SRCRB4D	32	1	0	0	1	0	0.337533	0.478302	0.693147
TFDP2	32	1	0	0	1	0	0.337533	0.478302	0.693147
TNRC18	32	1	0	0	1	2	0.337533	0.478302	-1.04811
YARS	32	1	0	0	1	0	0.337533	0.478302	0.693147
ZFAND3	32	1	0	0	1	0	0.337533	0.478302	0.693147
IMMP2L	95	2	0	0	2	2	0.338885	0.479848	0
NFAT5	163	3	0	1	2	1	0.339296	0.480062	1.04811
CHIC2	96	2	0	0	2	0	0.343386	0.485468	1.74126
APBA1	33	1	0	0	1	0	0.345748	0.485468	0.693147
C3orf26	33	1	0	0	1	0	0.345748	0.485468	0.693147
COL4A6	33	1	0	1	0	1	0.345748	0.485468	-0.693147
CREBBP	33	1	0	0	1	0	0.345748	0.485468	0.693147
DKFZp686O24166	33	1	0	0	1	1	0.345748	0.485468	0
LOC100188947	33	1	0	0	1	1	0.345748	0.485468	0
PCNT	33	1	0	1	0	1	0.345748	0.485468	-0.693147
RCN2	33	1	0	0	1	0	0.345748	0.485468	0.693147
SPATA5	33	1	0	1	0	1	0.345748	0.485468	-0.693147
PHKB	98	2	0	0	2	3	0.352358	0.493852	-1.03133
CLEC2B	167	3	0	0	3	2	0.352777	0.493852	1.03133
ARHGAP15	34	1	0	0	1	0	0.35386	0.493852	0.693147
C5orf41	34	1	0	1	0	0	0.35386	0.493852	0
C7orf50	34	1	0	0	1	0	0.35386	0.493852	0.693147
FAM96A	34	1	0	1	0	0	0.35386	0.493852	0
FEM1B	34	1	0	0	1	0	0.35386	0.493852	0.693147
INPP5A	34	1	0	0	1	0	0.35386	0.493852	0.693147
NEDD4L	99	2	0	0	2	0	0.356828	0.497617	1.74126
TACC1	100	2	0	0	2	2	0.361286	0.499741	0
ENOSF1	35	1	0	0	1	0	0.361872	0.499741	0.693147
FARP1	35	1	0	0	1	1	0.361872	0.499741	0
GPC4	35	1	0	0	1	0	0.361872	0.499741	0.693147
ITM2A	35	1	0	0	1	0	0.361872	0.499741	0.693147
MOBP	35	1	0	0	1	0	0.361872	0.499741	0.693147
PKM2	35	1	0	0	1	0	0.361872	0.499741	0.693147
PRKDC	35	1	0	0	1	0	0.361872	0.499741	0.693147
RNF44	35	1	0	0	1	2	0.361872	0.499741	-1.04811
SET	35	1	0	0	1	1	0.361872	0.499741	0
TCF3	35	1	0	0	1	0	0.361872	0.499741	0.693147
UBE2E1	35	1	0	1	0	1	0.361872	0.499741	-0.693147
UBE2L3	35	1	0	0	1	0	0.361872	0.499741	0.693147
MNT	101	2	0	0	2	2	0.365733	0.504318	0
PITPNC1	101	2	0	0	2	0	0.365733	0.504318	1.74126
CANX	36	1	0	0	1	1	0.369785	0.504999	0
CRYM	36	1	0	0	1	0	0.369785	0.504999	0.693147
DCBLD1	36	1	0	0	1	0	0.369785	0.504999	0.693147
ELF2	36	1	0	0	1	1	0.369785	0.504999	0
FBXW4	36	1	0	0	1	0	0.369785	0.504999	0.693147
KIFAP3	36	1	0	0	1	0	0.369785	0.504999	0.693147
MED15	36	1	0	0	1	0	0.369785	0.504999	0.693147
PRLR	36	1	0	0	1	1	0.369785	0.504999	0
RPL41	36	1	0	0	1	0	0.369785	0.504999	0.693147
SEPHS1	36	1	0	0	1	0	0.369785	0.504999	0.693147
ST3GAL2	36	1	0	1	0	0	0.369785	0.504999	0
TCTA	36	1	0	0	1	0	0.369785	0.504999	0.693147
WIBG	36	1	0	0	1	0	0.369785	0.504999	0.693147
UBE2H	319	5	0	0	5	3	0.374731	0.51113	1.85904
ATP9A	37	1	1	0	0	0	0.377599	0.51113	0
ATXN7	37	1	0	0	1	0	0.377599	0.51113	0.693147
KEAP1	37	1	1	0	0	2	0.377599	0.51113	-1.74126
KLHL15	37	1	0	0	1	1	0.377599	0.51113	0
LIMA1	37	1	0	0	1	0	0.377599	0.51113	0.693147
NRG1	37	1	0	0	1	0	0.377599	0.51113	0.693147
RCOR1	37	1	0	0	1	0	0.377599	0.51113	0.693147
RPL29	37	1	0	0	1	1	0.377599	0.51113	0
SNCAIP	37	1	0	0	1	1	0.377599	0.51113	0
TASP1	37	1	0	0	1	1	0.377599	0.51113	0
ZNF688	37	1	0	0	1	0	0.377599	0.51113	0.693147
RPGRIP1	104	2	0	0	2	1	0.379	0.51265	1.04811
CPA2	38	1	1	0	0	0	0.385317	0.516274	0
DTWD1	38	1	0	0	1	1	0.385317	0.516274	0
DYNC1I1	38	1	0	0	1	0	0.385317	0.516274	0.693147
ETS1	38	1	0	0	1	1	0.385317	0.516274	0
GIGYF2	38	1	0	0	1	1	0.385317	0.516274	0
KNTC1	38	1	0	1	0	2	0.385317	0.516274	-1.74126
LRP6	38	1	0	0	1	1	0.385317	0.516274	0
OFD1	38	1	0	0	1	0	0.385317	0.516274	0.693147
OSMR	38	1	0	1	0	0	0.385317	0.516274	0
PTPLA	38	1	0	0	1	0	0.385317	0.516274	0.693147
RNF130	38	1	0	0	1	0	0.385317	0.516274	0.693147
RPL27A	38	1	0	1	0	0	0.385317	0.516274	0
SREBF1	38	1	0	0	1	0	0.385317	0.516274	0.693147
MECOM	250	4	0	0	4	6	0.386531	0.517525	-1.72586
KDM2A	106	2	0	0	2	3	0.387779	0.518443	-1.03133
LRRC8B	106	2	1	0	1	3	0.387779	0.518443	-2.07944
DDAH1	107	2	0	0	2	1	0.392147	0.521187	1.04811
ASTN2	39	1	0	0	1	0	0.392938	0.521187	0.693147
AXIN1	39	1	0	0	1	0	0.392938	0.521187	0.693147
C5orf13	39	1	0	0	1	1	0.392938	0.521187	0
C7orf44	39	1	0	0	1	0	0.392938	0.521187	0.693147
MFNG	39	1	0	0	1	3	0.392938	0.521187	-2.07944
MTHFS	39	1	0	0	1	0	0.392938	0.521187	0.693147
MYO5B	39	1	0	0	1	0	0.392938	0.521187	0.693147
NDUFC1	39	1	1	0	0	0	0.392938	0.521187	0
SLC35B4	39	1	0	0	1	0	0.392938	0.521187	0.693147
WDR52	39	1	0	1	0	1	0.392938	0.521187	-0.693147
CDH6	40	1	0	0	1	0	0.400466	0.52738	0.693147
ENAH	40	1	0	0	1	0	0.400466	0.52738	0.693147
HPS4	40	1	0	1	0	0	0.400466	0.52738	0
KIF1B	40	1	0	0	1	1	0.400466	0.52738	0
RAPGEF1	40	1	0	0	1	1	0.400466	0.52738	0
RREB1	40	1	0	0	1	1	0.400466	0.52738	0
SMARCA1	40	1	0	0	1	0	0.400466	0.52738	0.693147
SMARCA4	40	1	0	0	1	0	0.400466	0.52738	0.693147
TICAM1	40	1	0	1	0	0	0.400466	0.52738	0
TPM4	40	1	0	0	1	0	0.400466	0.52738	0.693147
C15orf41	110	2	0	0	2	1	0.405167	0.532985	1.04811
TRPM3	183	3	0	0	3	2	0.406214	0.532985	1.03133
ADAMTS5	41	1	0	0	1	0	0.407899	0.532985	0.693147
ADNP	41	1	0	0	1	0	0.407899	0.532985	0.693147
AEBP2	41	1	0	0	1	0	0.407899	0.532985	0.693147
ATP9B	41	1	0	0	1	1	0.407899	0.532985	0
C4orf34	41	1	0	0	1	0	0.407899	0.532985	0.693147
CHMP4B	41	1	0	0	1	0	0.407899	0.532985	0.693147
FSTL5	41	1	0	0	1	0	0.407899	0.532985	0.693147
NYX	41	1	0	1	0	0	0.407899	0.532985	0
RCAN3	41	1	1	0	0	0	0.407899	0.532985	0
PRR16	112	2	0	0	2	0	0.413771	0.539141	1.74126
GTDC1	42	1	0	0	1	0	0.415241	0.539141	0.693147
MAN2A1	42	1	0	0	1	0	0.415241	0.539141	0.693147
MED27	42	1	0	0	1	0	0.415241	0.539141	0.693147
MIR548C	42	1	0	0	1	0	0.415241	0.539141	0.693147
PBLD	42	1	0	0	1	2	0.415241	0.539141	-1.04811
PRKAR2A	42	1	0	0	1	0	0.415241	0.539141	0.693147
SFMBT2	42	1	0	0	1	0	0.415241	0.539141	0.693147
SLC9A8	42	1	0	0	1	1	0.415241	0.539141	0
AGBL1	186	3	0	0	3	1	0.416101	0.539878	2.07944
PARN	113	2	0	0	2	0	0.41805	0.541644	1.74126
SAMD4A	113	2	0	0	2	1	0.41805	0.541644	1.04811
TBC1D16	114	2	0	0	2	0	0.422312	0.543582	1.74126
CELF1	43	1	0	0	1	0	0.422492	0.543582	0.693147
EXOC6B	43	1	0	0	1	2	0.422492	0.543582	-1.04811
FAM122C	43	1	1	0	0	1	0.422492	0.543582	-0.693147
FN3K	43	1	0	0	1	2	0.422492	0.543582	-1.04811
NUDT2	43	1	0	0	1	1	0.422492	0.543582	0
PCOLCE2	43	1	0	0	1	0	0.422492	0.543582	0.693147
RAD51C	43	1	1	0	0	0	0.422492	0.543582	0
SH3BGRL	43	1	0	0	1	0	0.422492	0.543582	0.693147
ZNF618	43	1	0	0	1	2	0.422492	0.543582	-1.04811
MTUS1	189	3	0	0	3	1	0.425933	0.547628	2.07944
CDKAL1	341	5	0	0	5	1	0.428128	0.548967	3.93848
AUTS2	190	3	1	0	2	1	0.429197	0.548967	1.04811
POU6F2	418	6	0	0	6	5	0.429508	0.548967	0.831229
AKT1S1	44	1	1	0	0	1	0.429652	0.548967	-0.693147
FRMPD4	44	1	0	0	1	0	0.429652	0.548967	0.693147
KCNAB1	44	1	0	0	1	0	0.429652	0.548967	0.693147
KIF14	44	1	0	0	1	0	0.429652	0.548967	0.693147
PARD3	44	1	0	0	1	0	0.429652	0.548967	0.693147
ZNF536	44	1	0	0	1	0	0.429652	0.548967	0.693147
THSD4	420	6	0	0	6	3	0.433851	0.553784	2.69027
ATG10	45	1	0	0	1	0	0.436724	0.553784	0.693147
DLG3	45	1	0	0	1	1	0.436724	0.553784	0
EFHC2	45	1	0	0	1	0	0.436724	0.553784	0.693147
ERCC6	45	1	0	0	1	2	0.436724	0.553784	-1.04811
KIF5C	45	1	0	0	1	1	0.436724	0.553784	0
LSM12	45	1	0	0	1	0	0.436724	0.553784	0.693147
RAI1	45	1	0	0	1	0	0.436724	0.553784	0.693147
TMEM2	45	1	0	0	1	0	0.436724	0.553784	0.693147
USP3	45	1	1	0	0	0	0.436724	0.553784	0
ZBTB4	45	1	0	0	1	2	0.436724	0.553784	-1.04811
APPL2	46	1	0	0	1	0	0.443708	0.5588	0.693147
ATE1	46	1	0	0	1	1	0.443708	0.5588	0
IER2	46	1	0	0	1	0	0.443708	0.5588	0.693147
LOC100128788	46	1	0	0	1	0	0.443708	0.5588	0.693147
NKIRAS2	46	1	0	0	1	0	0.443708	0.5588	0.693147
PDPN	46	1	0	0	1	1	0.443708	0.5588	0
PER3	46	1	0	0	1	0	0.443708	0.5588	0.693147
PFAS	46	1	0	0	1	2	0.443708	0.5588	-1.04811
UNC45A	46	1	0	0	1	0	0.443708	0.5588	0.693147
ZNF292	46	1	0	0	1	0	0.443708	0.5588	0.693147
ZNF608	120	2	0	0	2	0	0.447538	0.561735	1.74126
IL1RAPL1	504	7	0	0	7	4	0.447979	0.561735	2.50133
ATP10D	47	1	0	0	1	1	0.450606	0.561735	0
BNC2	47	1	0	0	1	0	0.450606	0.561735	0.693147
CDK6	47	1	0	0	1	2	0.450606	0.561735	-1.04811
CFLAR	47	1	0	0	1	0	0.450606	0.561735	0.693147
DAK	47	1	0	0	1	0	0.450606	0.561735	0.693147
GNL3L	47	1	1	0	0	0	0.450606	0.561735	0
LOC100131691	47	1	0	0	1	2	0.450606	0.561735	-1.04811
LYST	47	1	0	1	0	0	0.450606	0.561735	0
MTA3	47	1	0	0	1	1	0.450606	0.561735	0
PPARG	47	1	0	0	1	0	0.450606	0.561735	0.693147
SESTD1	47	1	0	0	1	1	0.450606	0.561735	0
SMARCD3	47	1	0	0	1	0	0.450606	0.561735	0.693147
TBL1X	47	1	0	0	1	0	0.450606	0.561735	0.693147
ANKS1A	122	2	0	0	2	3	0.455808	0.567836	-1.03133
AFF3	48	1	0	0	1	0	0.457417	0.568307	0.693147
MEGF9	48	1	0	0	1	0	0.457417	0.568307	0.693147
PBX1	48	1	0	0	1	0	0.457417	0.568307	0.693147
RRAS2	48	1	0	0	1	1	0.457417	0.568307	0
PDZD2	123	2	0	0	2	2	0.459916	0.571026	0
SGCD	124	2	0	0	2	1	0.464005	0.572808	1.04811
CDH4	49	1	0	0	1	2	0.464145	0.572808	-1.04811
DPYD	49	1	0	0	1	1	0.464145	0.572808	0
LUC7L2	49	1	1	0	0	0	0.464145	0.572808	0
NET1	49	1	0	0	1	1	0.464145	0.572808	0
PIGP	49	1	0	1	0	0	0.464145	0.572808	0
TBC1D22A	49	1	0	0	1	0	0.464145	0.572808	0.693147
WRAP53	49	1	0	0	1	1	0.464145	0.572808	0
ZBTB7B	49	1	0	0	1	0	0.464145	0.572808	0.693147
ADAMTSL1	201	3	0	0	3	1	0.464626	0.573018	2.07944
C20orf199	50	1	0	0	1	1	0.470789	0.578299	0
EXOC6	50	1	0	0	1	0	0.470789	0.578299	0.693147
P2RX3	50	1	0	0	1	0	0.470789	0.578299	0.693147
RNGTT	50	1	0	0	1	2	0.470789	0.578299	-1.04811
SKAP2	50	1	0	1	0	0	0.470789	0.578299	0
VGLL4	50	1	0	0	1	0	0.470789	0.578299	0.693147
HS6ST3	126	2	0	0	2	1	0.472129	0.57956	1.04811
SOX5	283	4	0	0	4	3	0.476774	0.580944	0.96441
ALDOA	51	1	0	0	1	1	0.47735	0.580944	0
ATXN1	51	1	0	0	1	1	0.47735	0.580944	0
CLYBL	51	1	0	1	0	0	0.47735	0.580944	0
LYRM1	51	1	0	0	1	0	0.47735	0.580944	0.693147
MCM2	51	1	0	0	1	0	0.47735	0.580944	0.693147
OAS2	51	1	1	0	0	0	0.47735	0.580944	0
PARVB	51	1	0	0	1	0	0.47735	0.580944	0.693147
SIPA1L1	51	1	0	0	1	1	0.47735	0.580944	0
TCF7L1	51	1	0	0	1	1	0.47735	0.580944	0
TPM1	51	1	0	0	1	0	0.47735	0.580944	0.693147
UBL7	51	1	0	0	1	0	0.47735	0.580944	0.693147
YWHAE	51	1	0	0	1	1	0.47735	0.580944	0
C11orf41	52	1	1	0	0	0	0.483831	0.588055	0
RBM9	52	1	0	0	1	0	0.483831	0.588055	0.693147
ARHGAP31	53	1	0	0	1	0	0.49023	0.593877	0.693147
C15orf17	53	1	0	0	1	1	0.49023	0.593877	0
FBXW7	53	1	0	0	1	0	0.49023	0.593877	0.693147
KPNB1	53	1	0	0	1	1	0.49023	0.593877	0
PARD3B	53	1	0	0	1	2	0.49023	0.593877	-1.04811
GNAT3	131	2	1	0	1	0	0.492108	0.595761	0.693147
MKL1	54	1	0	0	1	0	0.496551	0.600351	0.693147
SLC39A1	54	1	0	0	1	0	0.496551	0.600351	0.693147
KAZALD1	55	1	0	0	1	0	0.502793	0.605913	0.693147
LAMA3	55	1	0	0	1	0	0.502793	0.605913	0.693147
NPAS3	55	1	0	0	1	0	0.502793	0.605913	0.693147
PION	55	1	0	0	1	0	0.502793	0.605913	0.693147
ZNF827	55	1	0	0	1	1	0.502793	0.605913	0
C6orf106	56	1	0	0	1	0	0.508957	0.612142	0.693147
PLXNC1	56	1	0	0	1	2	0.508957	0.612142	-1.04811
TBCK	56	1	1	0	0	2	0.508957	0.612142	-1.74126
TRIM2	216	3	0	0	3	2	0.511283	0.613721	1.03133
BMPR1A	136	2	0	0	2	0	0.5116	0.613721	1.74126
EIF4E3	136	2	0	0	2	1	0.5116	0.613721	1.04811
NFIC	136	2	0	0	2	2	0.5116	0.613721	0
AKAP6	57	1	0	0	1	1	0.515046	0.615852	0
DKFZP686I15217	57	1	1	0	0	0	0.515046	0.615852	0
IGDCC4	57	1	0	0	1	0	0.515046	0.615852	0.693147
KTN1	57	1	0	0	1	1	0.515046	0.615852	0
MAPKAP1	57	1	0	1	0	0	0.515046	0.615852	0
FAM184B	58	1	0	0	1	0	0.521058	0.620628	0.693147
FIGN	58	1	0	0	1	0	0.521058	0.620628	0.693147
HP1BP3	58	1	0	0	1	1	0.521058	0.620628	0
MAD1L1	58	1	0	0	1	0	0.521058	0.620628	0.693147
PCDHAC2	58	1	0	0	1	0	0.521058	0.620628	0.693147
UBTF	58	1	0	0	1	1	0.521058	0.620628	0
PHF20	59	1	0	0	1	0	0.526996	0.625798	0.693147
PTPRA	59	1	0	0	1	0	0.526996	0.625798	0.693147
ZNF385D	59	1	0	0	1	1	0.526996	0.625798	0
TEAD1	141	2	0	0	2	3	0.530592	0.625798	-1.03133
CYP7B1	60	1	0	0	1	0	0.532861	0.625798	0.693147
HDGF	60	1	0	0	1	0	0.532861	0.625798	0.693147
LUZP2	60	1	0	0	1	1	0.532861	0.625798	0
PCDHA1	60	1	0	0	1	0	0.532861	0.625798	0.693147
PCDHA10	60	1	0	0	1	0	0.532861	0.625798	0.693147
PCDHA11	60	1	0	0	1	0	0.532861	0.625798	0.693147
PCDHA12	60	1	0	0	1	0	0.532861	0.625798	0.693147
PCDHA13	60	1	0	0	1	0	0.532861	0.625798	0.693147
PCDHA2	60	1	0	0	1	0	0.532861	0.625798	0.693147
PCDHA3	60	1	0	0	1	0	0.532861	0.625798	0.693147
PCDHA4	60	1	0	0	1	0	0.532861	0.625798	0.693147
PCDHA5	60	1	0	0	1	0	0.532861	0.625798	0.693147
PCDHA6	60	1	0	0	1	0	0.532861	0.625798	0.693147
PCDHA7	60	1	0	0	1	0	0.532861	0.625798	0.693147
PCDHA8	60	1	0	0	1	0	0.532861	0.625798	0.693147
PCDHA9	60	1	0	0	1	0	0.532861	0.625798	0.693147
PCDHAC1	60	1	0	0	1	0	0.532861	0.625798	0.693147
RANBP1	60	1	0	0	1	2	0.532861	0.625798	-1.04811
HNRNPUL1	61	1	0	0	1	0	0.538652	0.629394	0.693147
LOC100129716	61	1	0	0	1	0	0.538652	0.629394	0.693147
PPM1E	61	1	0	0	1	1	0.538652	0.629394	0
PPP4R4	61	1	0	0	1	1	0.538652	0.629394	0
SEC1	61	1	0	0	1	2	0.538652	0.629394	-1.04811
SRBD1	61	1	0	0	1	1	0.538652	0.629394	0
TBC1D5	61	1	0	0	1	1	0.538652	0.629394	0
TCF7L2	61	1	0	0	1	4	0.538652	0.629394	-3.04385
C21orf34	471	6	0	0	6	2	0.541439	0.632203	3.7216
RBPMS	144	2	0	0	2	1	0.541741	0.632203	1.04811
AR	62	1	0	0	1	1	0.544372	0.63407	0
KCTD16	62	1	0	0	1	0	0.544372	0.63407	0.693147
PHF21A	62	1	0	0	1	1	0.544372	0.63407	0
GRIA3	146	2	0	0	2	3	0.549072	0.638232	-1.03133
LRPPRC	146	2	0	0	2	0	0.549072	0.638232	1.74126
CACHD1	63	1	0	0	1	2	0.550021	0.638232	-1.04811
MGA	63	1	0	0	1	0	0.550021	0.638232	0.693147
MKX	63	1	0	1	0	0	0.550021	0.638232	0
NFKBIB	63	1	0	0	1	0	0.550021	0.638232	0.693147
BCAS3	64	1	0	0	1	1	0.5556	0.643491	0
GLOD4	64	1	0	0	1	0	0.5556	0.643491	0.693147
TMEM189-UBE2V1	64	1	0	0	1	0	0.5556	0.643491	0.693147
RORA	397	5	0	0	5	3	0.557878	0.645724	1.85904
ACACA	315	4	0	0	4	4	0.558955	0.645818	0
HMBOX1	149	2	0	0	2	1	0.559911	0.645818	1.04811
CEP135	65	1	0	0	1	0	0.56111	0.645818	0.693147
GON4L	65	1	0	1	0	1	0.56111	0.645818	-0.693147
GRIK4	65	1	0	0	1	0	0.56111	0.645818	0.693147
KCNN3	65	1	0	0	1	1	0.56111	0.645818	0
MUM1	65	1	1	0	0	0	0.56111	0.645818	0
PIAS1	65	1	1	0	0	0	0.56111	0.645818	0
USH2A	65	1	0	0	1	2	0.56111	0.645818	-1.04811
PTPRJ	150	2	0	0	2	2	0.563482	0.648145	0
C1orf43	66	1	1	0	0	0	0.566551	0.649246	0
FERMT1	66	1	0	0	1	3	0.566551	0.649246	-2.07944
MAD2L2	66	1	0	0	1	1	0.566551	0.649246	0
SKA2	66	1	0	0	1	1	0.566551	0.649246	0
SMAD6	66	1	0	1	0	0	0.566551	0.649246	0
TMX4	66	1	0	0	1	1	0.566551	0.649246	0
DST	151	2	0	1	1	0	0.567032	0.649394	0.693147
NCOA3	152	2	0	0	2	2	0.570562	0.652164	0
RERE	152	2	0	0	2	0	0.570562	0.652164	1.74126
GART	67	1	1	0	0	0	0.571925	0.652164	0
IGF1R	67	1	0	0	1	0	0.571925	0.652164	0.693147
MRPS27	67	1	0	0	1	2	0.571925	0.652164	-1.04811
SYNRG	67	1	0	0	1	0	0.571925	0.652164	0.693147
VAV2	67	1	0	0	1	0	0.571925	0.652164	0.693147
DIP2B	153	2	0	0	2	3	0.57407	0.653802	-1.03133
TCF4	153	2	0	0	2	4	0.57407	0.653802	-1.99574
AMMECR1	68	1	0	0	1	1	0.577232	0.656154	0
C6orf211	68	1	0	0	1	1	0.577232	0.656154	0
RNF182	68	1	0	0	1	0	0.577232	0.656154	0.693147
UACA	154	2	0	0	2	0	0.577557	0.656154	1.74126
GPR158	69	1	0	0	1	1	0.582473	0.660924	0
SKAP1	69	1	0	0	1	0	0.582473	0.660924	0.693147
NCKAP5	70	1	0	0	1	2	0.58765	0.666255	-1.04811
FOXN3	157	2	0	0	2	3	0.587893	0.666255	-1.03133
BAZ2B	71	1	0	0	1	0	0.592762	0.669715	0.693147
CCND3	71	1	0	0	1	0	0.592762	0.669715	0.693147
CD36	71	1	0	0	1	0	0.592762	0.669715	0.693147
DENND5A	71	1	0	0	1	2	0.592762	0.669715	-1.04811
ERBB4	71	1	0	0	1	3	0.592762	0.669715	-2.07944
FGFR1	159	2	0	1	1	1	0.594679	0.67147	0
ATP5A1	72	1	0	0	1	2	0.59781	0.672537	-1.04811
CNTNAP4	72	1	0	0	1	0	0.59781	0.672537	0.693147
EIF4B	72	1	0	0	1	0	0.59781	0.672537	0.693147
HSPC159	72	1	1	0	0	0	0.59781	0.672537	0
NRG4	72	1	0	0	1	1	0.59781	0.672537	0
SDC2	72	1	0	0	1	1	0.59781	0.672537	0
METT10D	73	1	0	0	1	0	0.602797	0.676273	0.693147
TBC1D9	73	1	0	0	1	0	0.602797	0.676273	0.693147
VWA3B	73	1	0	0	1	0	0.602797	0.676273	0.693147
WDR81	73	1	0	0	1	2	0.602797	0.676273	-1.04811
CTNNA3	248	3	0	1	2	2	0.602964	0.676273	0
LCLAT1	162	2	0	0	2	1	0.604699	0.677806	1.04811
FBXO46	74	1	0	0	1	0	0.607721	0.679131	0.693147
MICALCL	74	1	0	0	1	2	0.607721	0.679131	-1.04811
NINJ2	74	1	0	0	1	1	0.607721	0.679131	0
PLS3	74	1	0	1	0	0	0.607721	0.679131	0
TPM3	74	1	0	0	1	0	0.607721	0.679131	0.693147
CARM1	75	1	0	0	1	1	0.612584	0.683324	0
PPP2R4	75	1	0	0	1	0	0.612584	0.683324	0.693147
RPGRIP1L	75	1	0	0	1	1	0.612584	0.683324	0
SHROOM3	165	2	0	0	2	0	0.614529	0.685079	1.74126
DLG2	845	10	0	0	10	10	0.615745	0.685779	0
EXOC2	76	1	0	0	1	0	0.617387	0.685779	0.693147
GATAD2B	76	1	0	0	1	0	0.617387	0.685779	0.693147
MBD3	76	1	0	0	1	1	0.617387	0.685779	0
SH3BP2	76	1	0	0	1	1	0.617387	0.685779	0
UGT1A6	76	1	0	0	1	2	0.617387	0.685779	-1.04811
C10orf140	166	2	1	0	1	3	0.617764	0.685785	-2.07944
LGR4	167	2	0	0	2	2	0.620978	0.688561	0
DIRC3	77	1	0	0	1	1	0.62213	0.688561	0
HDAC9	77	1	0	0	1	1	0.62213	0.688561	0
TGIF1	77	1	0	0	1	0	0.62213	0.688561	0.693147
THSD7A	77	1	0	0	1	1	0.62213	0.688561	0
LDB2	257	3	1	0	2	3	0.626601	0.692085	-1.03133
MKLN1	78	1	0	0	1	0	0.626815	0.692085	0.693147
PDLIM5	78	1	0	0	1	1	0.626815	0.692085	0
SMARCA2	78	1	0	0	1	2	0.626815	0.692085	-1.04811
NAV3	170	2	0	0	2	1	0.630494	0.693458	1.04811
WDR20	170	2	0	0	2	3	0.630494	0.693458	-1.03133
ADCY9	79	1	0	0	1	1	0.631441	0.693458	0
MATR3	79	1	0	0	1	0	0.631441	0.693458	0.693147
PDZRN3	79	1	0	0	1	2	0.631441	0.693458	-1.04811
PRSS12	79	1	0	0	1	0	0.631441	0.693458	0.693147
RFX3	79	1	0	0	1	0	0.631441	0.693458	0.693147
STAG1	79	1	0	0	1	0	0.631441	0.693458	0.693147
THAP6	79	1	1	0	0	1	0.631441	0.693458	-0.693147
PBX3	260	3	0	0	3	2	0.634261	0.69614	1.03133
BCL9	80	1	0	0	1	2	0.63601	0.697645	-1.04811
KSR1	81	1	0	0	1	2	0.640523	0.702177	-1.04811
DIAPH2	82	1	0	0	1	1	0.644979	0.705804	0
UGT1A7	82	1	0	0	1	2	0.644979	0.705804	-1.04811
UGT1A9	82	1	0	0	1	2	0.644979	0.705804	-1.04811
DCLK1	83	1	0	0	1	1	0.64938	0.709779	0
SLMO1	83	1	0	0	1	2	0.64938	0.709779	-1.04811
AFAP1	84	1	0	0	1	2	0.653727	0.71284	-1.04811
POLA1	84	1	0	0	1	0	0.653727	0.71284	0.693147
UGT1A10	84	1	0	0	1	2	0.653727	0.71284	-1.04811
UGT1A8	84	1	0	0	1	2	0.653727	0.71284	-1.04811
HYDIN	85	1	1	0	0	1	0.658019	0.717097	-0.693147
CATSPERB	86	1	0	1	0	1	0.662259	0.720866	-0.693147
FAM53B	86	1	0	0	1	1	0.662259	0.720866	0
LRRC2	87	1	0	0	1	0	0.666446	0.723979	0.693147
SIPA1L3	87	1	0	0	1	1	0.666446	0.723979	0
SPTBN1	87	1	0	0	1	0	0.666446	0.723979	0.693147
CTNNA1	182	2	1	0	1	3	0.666689	0.723979	-2.07944
DPP10	184	2	0	0	2	3	0.672434	0.729789	-1.03133
NKAIN3	89	1	0	0	1	1	0.674664	0.730919	0
SNHG3	89	1	0	1	0	2	0.674664	0.730919	-1.74126
USP48	89	1	0	0	1	3	0.674664	0.730919	-2.07944
NR1H4	90	1	0	0	1	0	0.678697	0.733996	0.693147
RNLS	90	1	0	0	1	0	0.678697	0.733996	0.693147
TRPS1	90	1	0	0	1	3	0.678697	0.733996	-2.07944
EBF3	91	1	0	0	1	0	0.68268	0.737439	0.693147
PXT1	91	1	1	0	0	1	0.68268	0.737439	-0.693147
ODZ4	92	1	0	0	1	1	0.686614	0.741254	0
KCND2	93	1	0	0	1	0	0.690499	0.744141	0.693147
MALAT1	93	1	0	1	0	0	0.690499	0.744141	0
MAST2	93	1	0	0	1	3	0.690499	0.744141	-2.07944
NCRNA00259	284	3	0	0	3	3	0.691545	0.744834	0
MBNL1	94	1	0	0	1	0	0.694335	0.747403	0.693147
ADAM12	95	1	0	0	1	2	0.698124	0.749732	-1.04811
ITSN1	95	1	0	0	1	0	0.698124	0.749732	0.693147
MYRIP	95	1	0	0	1	2	0.698124	0.749732	-1.04811
VTI1A	95	1	0	0	1	4	0.698124	0.749732	-3.04385
VPS37B	194	2	0	0	2	0	0.699959	0.751264	1.74126
SYNE2	96	1	0	0	1	1	0.701867	0.752874	0
ATP2C1	97	1	1	0	0	3	0.705562	0.756399	-2.77259
MYO5A	98	1	0	0	1	2	0.709212	0.75987	-1.04811
FAM124A	99	1	0	0	1	0	0.712817	0.762404	0.693147
MET	99	1	0	0	1	0	0.712817	0.762404	0.693147
MORF4L1	99	1	0	0	1	2	0.712817	0.762404	-1.04811
SLIT3	200	2	0	0	2	3	0.715531	0.764715	-1.03133
CHD2	100	1	0	0	1	1	0.716377	0.764715	0
SIL1	100	1	0	0	1	1	0.716377	0.764715	0
FHIT	479	5	0	0	5	5	0.716636	0.764715	0
PARK2	296	3	0	0	3	6	0.717532	0.765229	-2.69027
ENOX1	101	1	0	0	1	1	0.719892	0.76686	0
ZFAND6	101	1	0	0	1	1	0.719892	0.76686	0
FTO	102	1	0	0	1	1	0.723364	0.770114	0
CENPT	103	1	0	0	1	3	0.726794	0.772873	-2.07944
ST5	103	1	0	0	1	3	0.726794	0.772873	-2.07944
ARHGEF6	105	1	0	0	1	0	0.733525	0.778684	0.693147
ERC1	105	1	0	0	1	0	0.733525	0.778684	0.693147
NUMA1	105	1	0	0	1	0	0.733525	0.778684	0.693147
ABR	106	1	0	0	1	3	0.736828	0.780394	-2.07944
EIF4G3	106	1	0	0	1	3	0.736828	0.780394	-2.07944
RAB8B	106	1	0	0	1	2	0.736828	0.780394	-1.04811
SLC22A15	106	1	0	0	1	2	0.736828	0.780394	-1.04811
OMG	107	1	0	1	0	0	0.74009	0.782502	0
PDE11A	107	1	0	0	1	2	0.74009	0.782502	-1.04811
VCL	107	1	0	0	1	2	0.74009	0.782502	-1.04811
SH3GL3	109	1	0	0	1	1	0.746493	0.787918	0
WWTR1	109	1	0	0	1	1	0.746493	0.787918	0
ZNF516	109	1	0	0	1	1	0.746493	0.787918	0
PACRG	111	1	0	0	1	1	0.752739	0.794056	0
RYR1	112	1	0	0	1	1	0.755804	0.796378	0
TNFRSF11A	112	1	0	0	1	1	0.755804	0.796378	0
CNTN1	113	1	0	0	1	3	0.758831	0.799111	-2.07944
LOC645323	114	1	0	0	1	2	0.76182	0.801801	-1.04811
LECT1	115	1	0	0	1	2	0.764772	0.80445	-1.04811
ZBTB20	879	9	0	0	9	11	0.770249	0.809749	-1.25928
ATP8A2	224	2	0	0	2	1	0.771143	0.809766	1.04811
MAP1B	224	2	0	0	2	2	0.771143	0.809766	0
ZNF143	120	1	0	0	1	0	0.778993	0.817544	0.693147
DIS3L	124	1	0	0	1	2	0.789748	0.82789	-1.04811
PPP3CA	124	1	0	0	1	0	0.789748	0.82789	0.693147
DACH1	336	3	0	0	3	2	0.791895	0.829208	1.03133
ALPK1	125	1	0	0	1	3	0.792354	0.829208	-2.07944
DOCK3	125	1	0	0	1	0	0.792354	0.829208	0.693147
PAK3	337	3	0	0	3	3	0.793525	0.829962	0
UTRN	338	3	0	0	3	3	0.795143	0.830786	0
NF1	236	2	0	0	2	0	0.795213	0.830786	1.74126
NEGR1	127	1	0	0	1	0	0.79747	0.832201	0.693147
UVRAG	127	1	0	0	1	1	0.79747	0.832201	0
C17orf106	128	1	0	0	1	2	0.79998	0.834349	-1.04811
DNAH11	130	1	0	0	1	0	0.804907	0.83854	0.693147
LPHN3	130	1	0	0	1	1	0.804907	0.83854	0
NHSL1	132	1	0	0	1	1	0.809713	0.843071	0
SNHG3-RCC1	134	1	0	1	0	3	0.814401	0.847473	-2.77259
RBMS3	135	1	0	0	1	2	0.816701	0.849232	-1.04811
NLGN1	248	2	0	0	2	5	0.817012	0.849232	-2.89037
EPHA6	137	1	0	0	1	0	0.821216	0.853122	0.693147
AKT3	356	3	0	0	3	4	0.8225	0.853975	-0.96441
BTRC	138	1	0	0	1	0	0.823432	0.854461	0.693147
CADM2	360	3	0	0	3	2	0.828138	0.858861	1.03133
SPAG9	256	2	0	0	2	1	0.830365	0.860687	1.04811
C8orf34	142	1	0	0	1	3	0.832024	0.861439	-2.07944
CAMTA1	142	1	0	0	1	2	0.832024	0.861439	-1.04811
RELN	143	1	0	0	1	0	0.834106	0.86311	0.693147
ZNRF2	259	2	0	0	2	2	0.835141	0.863697	0
KDM2B	144	1	0	0	1	4	0.836162	0.864268	-3.04385
ZFHX3	260	2	0	0	2	4	0.836706	0.864346	-1.99574
MACROD2	145	1	0	0	1	3	0.838192	0.864913	-2.07944
MGAT4C	145	1	0	0	1	3	0.838192	0.864913	-2.07944
LRP1B	262	2	0	0	2	1	0.839795	0.866082	1.04811
AGPS	263	2	0	0	2	0	0.841319	0.86717	1.74126
FRMD6	148	1	0	0	1	4	0.844134	0.869301	-3.04385
ERC2	265	2	0	0	2	5	0.844329	0.869301	-2.89037
ASCC1	150	1	0	0	1	2	0.847973	0.871594	-1.04811
ITPR2	150	1	0	0	1	1	0.847973	0.871594	0
TET1	150	1	0	0	1	1	0.847973	0.871594	0
GPC3	377	3	0	0	3	3	0.850408	0.87361	0
AKAP13	152	1	0	0	1	1	0.851718	0.874468	0
DNAH14	153	1	0	0	1	0	0.853556	0.875381	0.693147
FUT8	153	1	0	0	1	0	0.853556	0.875381	0.693147
PLXDC2	154	1	0	0	1	3	0.855371	0.876755	-2.07944
AFF2	156	1	0	0	1	2	0.858933	0.878941	-1.04811
ATP8A1	156	1	1	0	0	2	0.858933	0.878941	-1.74126
ST3GAL3	156	1	0	0	1	5	0.858933	0.878941	-3.93848
PCDH9	276	2	0	0	2	3	0.859972	0.879517	-1.03133
GRAP2	158	1	0	0	1	0	0.862408	0.881031	0.693147
GREB1L	158	1	0	0	1	2	0.862408	0.881031	-1.04811
ATP8B4	159	1	0	0	1	1	0.864113	0.882284	0
EYS	160	1	0	0	1	3	0.865797	0.883026	-2.07944
SEMA3E	160	1	0	0	1	3	0.865797	0.883026	-2.07944
TNRC6B	161	1	0	0	1	0	0.86746	0.884234	0.693147
DLGAP1	164	1	0	0	1	2	0.872326	0.888704	-1.04811
UBE2G1	165	1	0	0	1	2	0.873909	0.889824	-1.04811
ZC3H4	167	1	0	0	1	1	0.877014	0.892494	0
CACNA2D1	170	1	0	0	1	1	0.88153	0.896595	0
CDC42BPB	171	1	0	0	1	1	0.882998	0.897099	0
LIMCH1	171	1	0	0	1	1	0.882998	0.897099	0
ZNF385B	175	1	0	0	1	0	0.88869	0.902385	0.693147
SLIT2	300	2	0	0	2	3	0.889215	0.902421	-1.03133
SBF2	176	1	0	0	1	1	0.89007	0.902792	0
NRXN1	302	2	0	0	2	4	0.891377	0.903621	-1.99574
SYT1	529	4	0	0	4	4	0.896669	0.908033	0
PDSS2	181	1	0	0	1	1	0.896714	0.908033	0
CCDC91	187	1	0	0	1	1	0.904159	0.91507	0
DYM	438	3	0	0	3	3	0.910831	0.921051	0
ABCA13	193	1	0	0	1	0	0.911067	0.921051	0.693147
RNF220	201	1	0	0	1	4	0.919509	0.929077	-3.04385
GPR98	334	2	0	0	2	3	0.921025	0.9301	-1.03133
ROBO1	569	4	0	0	4	8	0.924585	0.933183	-3.22804
TMEM49	208	1	0	0	1	2	0.926236	0.934338	-1.04811
ST18	209	1	0	0	1	1	0.92715	0.934749	0
MPPED2	215	1	0	0	1	0	0.9324	0.939529	0.693147
C2orf34	217	1	0	0	1	4	0.934065	0.940693	-3.04385
PLEKHG1	223	1	0	1	0	5	0.938816	0.944962	-4.63163
STX18	365	2	0	0	2	5	0.942332	0.947984	-2.89037
BCOR	242	1	0	0	1	4	0.951719	0.956906	-3.04385
KIAA1409	245	1	0	0	1	1	0.953491	0.958165	0
NELL1	393	2	0	0	2	2	0.956767	0.960934	0
ARID5B	410	2	0	0	2	3	0.963767	0.967438	-1.03133
TOX	268	1	0	0	1	4	0.965083	0.968232	-3.04385
MYO10	427	2	0	0	2	3	0.969669	0.972061	-1.03133
TTC28	558	3	0	1	2	4	0.969954	0.972061	-1.99574
CHN1	298	1	0	0	1	2	0.975975	0.977565	-1.04811
CSMD1	305	1	0	0	1	2	0.977982	0.979043	-1.04811
NRP1	357	1	0	0	1	6	0.988481	0.989017	-4.76971
PTPRD	588	2	0	0	2	7	0.994623	0.994623	-4.49707

## Sheet: WNT sensitizing reg.
	Unsorted cells	Sorted cells					Derived from columns B and C		Derived from columns F and G
	All GT insertions in genes	Inactivating GT insertions in genes	Sense GT insetions in exons	Antisense GT insetions in exons	Sense GT insetions in introns	Antisense GT insetions in introns	p-value	FDR-corrected p-value	IGTIOB score
Total for dataset:	208561	66872	5608	5657	55607	53687
Gene
ZNRF3	29	62	3	0	59	11	1.39221e-18	1.55816e-14	15.2765
TCF7L2	61	70	3	4	63	16	7.70651e-13	4.31256e-09	13.3726
PBRM1	161	107	0	1	106	47	1.12686e-08	4.20392e-05	9.88121
MLL5	58	45	1	0	44	7	1.24906e-05	0.0349488	14.6673
SC65	4	12	5	4	3	2	2.77742e-05	0.0487677	1.03133
ATP2C1	97	62	1	1	60	30	2.78722e-05	0.0487677	7.36787
MALAT1	93	60	32	28	0	0	3.05016e-05	0.0487677	0
ARID2	16	20	0	4	16	8	5.67261e-05	0.0793598	4.61562
DACH1	336	153	0	0	153	141	0.000262901	0.259461	1.16955
EGLN1	4	10	4	2	4	3	0.000263934	0.259461	0.96441
LRRC8B	106	61	29	27	5	8	0.000276392	0.259461	-2.33341
VCPIP1	1	7	2	2	3	0	0.0003134	0.259461	2.77259
PGAP1	2	8	0	0	8	1	0.000334537	0.259461	6.27189
RAD54L	2	8	6	2	0	0	0.000334537	0.259461	0
PCBP1	7	12	5	7	0	0	0.000362006	0.259461	0
ABHD14B	10	14	3	6	5	1	0.00037864	0.259461	3.93848
SPEN	78	48	1	1	46	26	0.000394106	0.259461	5.71465
DHRS3	6	11	1	2	8	2	0.000476706	0.271718	5.22378
ORC5L	6	11	0	0	11	1	0.000476706	0.271718	8.21515
TNPO2	79	48	4	7	37	21	0.000485557	0.271718	5.3055
THBS3	19	19	3	9	7	2	0.000529605	0.282254	4.49707
ILF3	39	29	1	0	28	9	0.000666179	0.311729	8.70924
HDX	11	14	5	5	4	5	0.000668467	0.311729	-0.894632
LONRF2	11	14	3	7	4	0	0.000668467	0.311729	3.737
SFRS2B	8	12	7	5	0	0	0.000704876	0.314776	0
POU3F3	0	5	2	3	0	0	0.000843753	0.314776	0
SERINC4	0	5	2	0	3	0	0.000843753	0.314776	2.77259
STAT2	0	5	0	0	5	1	0.000843753	0.314776	3.93848
XIRP2	0	5	0	0	5	0	0.000843753	0.314776	4.63163
ZNF226	0	5	1	2	2	0	0.000843753	0.314776	1.74126
C14orf23	10	13	0	0	13	3	0.000925707	0.314826	7.27524
CAMTA2	15	16	8	4	4	2	0.000928275	0.314826	1.99574
SOX21	15	16	10	6	0	0	0.000928275	0.314826	0
YY1	3	8	3	4	1	2	0.000963746	0.317243	-1.04811
BEND4	2	7	0	1	6	3	0.00111195	0.343507	2.69027
CNOT2	12	14	0	0	14	2	0.00112566	0.343507	8.8388
HERPUD1	1	6	0	3	3	1	0.00113561	0.343507	2.07944
NUAK2	27	22	1	4	17	19	0.00127502	0.372485	-0.894706
KIAA1908	14	15	6	3	6	1	0.00129797	0.372485	4.76971
FLJ37453	75	44	18	19	7	7	0.00136445	0.381773	0
RRM1	11	13	0	3	10	5	0.00157224	0.429183	3.66372
FBXO4	5	9	0	3	6	1	0.00172528	0.441231	4.76971
PURB	5	9	5	4	0	0	0.00172528	0.441231	0
LOC100289341	26	21	7	14	0	0	0.00175622	0.441231	0
DVL2	8	11	2	3	6	1	0.00177407	0.441231	4.76971
HELZ	41	28	1	0	27	14	0.00203178	0.494341	5.43903
MYO1D	10	12	0	0	12	3	0.00219915	0.505566	6.71885
ARL4C	4	8	0	8	0	0	0.00227393	0.505566	0
CHAF1B	4	8	1	0	7	2	0.00227393	0.505566	4.49707
SCAND1	4	8	6	2	0	0	0.00227393	0.505566	0
COL4A6	33	24	1	1	22	14	0.00230377	0.505566	3.60355
SLC1A5	25	20	4	7	9	5	0.0024196	0.520773	3.01739
FRAT2	12	13	8	5	0	0	0.00255133	0.528786	0
WDR90	12	13	6	4	3	2	0.00255133	0.528786	1.03133
SDC2	72	41	0	1	40	19	0.00290564	0.55995	6.94832
AOAH	3	7	0	0	7	7	0.00292592	0.55995	0
SKI	3	7	0	1	6	4	0.00292592	0.55995	1.72586
C19orf54	34	24	9	9	6	4	0.00303553	0.55995	1.72586
LEPREL2	9	11	2	5	4	2	0.00308086	0.55995	1.99574
TAPBP	9	11	4	3	4	2	0.00308086	0.55995	1.99574
LOC100216545	32	23	11	12	0	0	0.00312627	0.55995	0
SEC14L2	32	23	10	13	0	0	0.00312627	0.55995	0
IMP3	30	22	11	11	0	0	0.00320551	0.55995	0
C11orf41	52	32	16	15	1	2	0.0033795	0.55995	-1.04811
DDX39	6	9	0	0	9	4	0.00338505	0.55995	3.91202
AIFM3	0	4	1	3	0	0	0.00347506	0.55995	0
EN1	0	4	3	1	0	1	0.00347506	0.55995	-0.693147
GPR88	0	4	2	2	0	0	0.00347506	0.55995	0
VGF	0	4	2	2	0	0	0.00347506	0.55995	0
SHROOM3	165	78	7	6	65	53	0.00353039	0.55995	2.36777
EYS	160	76	0	0	76	51	0.0035886	0.55995	4.69787
ASPDH	2	6	1	2	3	2	0.00360225	0.55995	1.03133
C17orf76	13	13	2	8	3	0	0.003977	0.579427	2.77259
BMF	143	69	19	17	33	25	0.00400443	0.579427	2.62574
DCBLD2	1	5	1	0	4	0	0.00403818	0.579427	3.737
SPATS1	1	5	2	0	3	2	0.00403818	0.579427	1.03133
STYX	1	5	0	0	5	1	0.00403818	0.579427	3.93848
TBC1D20	1	5	1	0	4	4	0.00403818	0.579427	0
ARHGEF38	8	10	2	2	6	0	0.00432341	0.597378	5.46286
HOXA11	8	10	3	2	5	2	0.00432341	0.597378	2.89037
MESDC2	8	10	0	1	9	2	0.00432341	0.597378	5.90776
OGFOD2	19	16	7	7	2	1	0.00455609	0.61291	1.04811
DLGAP4	21	17	3	4	10	10	0.00460193	0.61291	0
CLDN10	5	8	0	0	8	1	0.00465487	0.61291	6.27189
IQCC	5	8	1	6	1	0	0.00465487	0.61291	0.693147
MGA	63	36	0	0	36	7	0.00483002	0.628577	12.5726
C9orf43	10	11	3	6	2	1	0.00505984	0.636289	1.04811
HOXA7	10	11	3	5	3	5	0.00505984	0.636289	-1.85904
RECQL5	10	11	0	0	11	3	0.00505984	0.636289	6.13571
PIK3R2	32	22	3	0	19	15	0.00553553	0.659057	1.85698
KILLIN	12	12	7	5	0	0	0.0056045	0.659057	0
MBLAC1	12	12	6	4	2	1	0.0056045	0.659057	1.04811
PC	12	12	0	0	12	7	0.0056045	0.659057	3.25312
TRAF3IP2	28	20	3	3	14	7	0.00593514	0.659057	4.34173
HMHA1	14	13	1	2	10	8	0.00598178	0.659057	1.33032
PPFIA3	14	13	3	3	7	6	0.00598178	0.659057	0.775464
AMOTL2	7	9	2	1	6	3	0.0060781	0.659057	2.69027
FAM189B	7	9	2	2	5	0	0.0060781	0.659057	4.63163
KRI1	7	9	1	0	8	3	0.0060781	0.659057	4.19245
DPH1	16	14	2	3	9	7	0.00621916	0.659057	1.4107
CHIC2	96	49	3	3	43	32	0.00626074	0.659057	3.02176
COLEC11	18	15	0	0	15	9	0.00634265	0.659057	3.44133
EID2B	4	7	3	4	0	0	0.00635974	0.659057	0
FBXL8	4	7	0	0	7	0	0.00635974	0.659057	6.23832
HSD17B1	4	7	3	4	0	1	0.00635974	0.659057	-0.693147
HYAL3	4	7	2	3	2	0	0.00635974	0.659057	1.74126
LENG9	4	7	3	4	0	0	0.00635974	0.659057	0
ZNF180	4	7	1	1	5	0	0.00635974	0.659057	4.63163
DENND1B	9	10	0	0	10	4	0.00715601	0.728091	4.55836
NOTCH4	9	10	3	3	4	1	0.00715601	0.728091	3.04385
AES	11	11	0	4	7	8	0.00792052	0.755216	-0.726712
CAPN1	11	11	2	2	7	6	0.00792052	0.755216	0.775464
LOC100129387	54	31	12	19	0	0	0.00808102	0.755216	0
MAPRE1	6	8	1	2	5	2	0.008561	0.755216	2.89037
MTTP	6	8	1	0	7	2	0.008561	0.755216	4.49707
UBE2Q1	6	8	2	0	6	2	0.008561	0.755216	3.7216
MOCS2	23	17	2	1	14	4	0.00856214	0.755216	6.84306
C8orf39	3	6	4	2	0	0	0.00858284	0.755216	0
CD180	3	6	5	0	1	0	0.00858284	0.755216	0.693147
DMWD	3	6	1	1	4	2	0.00858284	0.755216	1.99574
G2E3	3	6	0	0	6	2	0.00858284	0.755216	3.7216
LUZP1	3	6	0	0	6	0	0.00858284	0.755216	5.46286
NTN1	3	6	0	0	6	2	0.00858284	0.755216	3.7216
PPARGC1B	3	6	0	0	6	1	0.00858284	0.755216	4.76971
SNX8	3	6	0	0	6	0	0.00858284	0.755216	5.46286
VCP	3	6	1	0	5	2	0.00858284	0.755216	2.89037
TSR1	52	30	12	13	5	11	0.00862748	0.755216	-4.27667
NLRC5	19	15	8	3	4	9	0.00883684	0.755216	-3.91202
SMG1	19	15	12	1	2	2	0.00883684	0.755216	0
LSR	17	14	6	5	3	1	0.00883965	0.755216	2.07944
NES	17	14	0	1	13	3	0.00883965	0.755216	7.27524
LOC147727	30	20	13	7	0	0	0.0100469	0.760655	0
CCDC106	8	9	3	3	3	7	0.0101564	0.760655	-3.46574
MAB21L1	8	9	5	4	0	0	0.0101564	0.760655	0
NR2F6	8	9	0	0	9	5	0.0101564	0.760655	3.01739
PAK1	8	9	2	0	7	3	0.0101564	0.760655	3.46574
DENND5B	37	23	5	13	5	3	0.0108544	0.760655	1.85904
HNRNPR	26	18	0	2	16	8	0.0109548	0.760655	4.61562
PHF12	26	18	5	1	12	8	0.0109548	0.760655	2.5264
SETD5	26	18	1	0	17	10	0.0109548	0.760655	3.75728
PLA2G4A	51	29	0	0	29	16	0.0111534	0.760655	5.10865
ACHE	10	10	2	7	1	1	0.0112312	0.760655	0
C1orf123	2	5	1	0	4	2	0.0112946	0.760655	1.99574
C9orf80	2	5	0	0	5	1	0.0112946	0.760655	3.93848
DNAJC8	2	5	1	0	4	1	0.0112946	0.760655	3.04385
ECM2	2	5	0	0	5	0	0.0112946	0.760655	4.63163
MAP3K11	2	5	3	2	0	0	0.0112946	0.760655	0
MTP18	2	5	0	0	5	2	0.0112946	0.760655	2.89037
NRBP2	2	5	0	2	3	0	0.0112946	0.760655	2.77259
PAM	2	5	0	0	5	2	0.0112946	0.760655	2.89037
SAC3D1	2	5	0	1	4	0	0.0112946	0.760655	3.737
SETD6	2	5	1	2	2	1	0.0112946	0.760655	1.04811
TMEM65	2	5	3	0	2	2	0.0112946	0.760655	0
TTC23L	2	5	0	2	3	2	0.0112946	0.760655	1.03133
ZNF92	2	5	0	1	4	1	0.0112946	0.760655	3.04385
C10orf95	22	16	9	5	2	1	0.011743	0.760655	1.04811
SPATS2	22	16	2	2	12	5	0.011743	0.760655	4.85981
WNK3	20	15	6	7	2	1	0.0120474	0.760655	1.04811
C20orf30	5	7	1	1	5	1	0.0120799	0.760655	3.93848
C6orf147	5	7	2	2	3	3	0.0120799	0.760655	0
FAM53A	5	7	1	1	5	0	0.0120799	0.760655	4.63163
ITPRIPL2	5	7	3	4	0	0	0.0120799	0.760655	0
NFKB2	5	7	0	3	4	0	0.0120799	0.760655	3.737
PHLPP2	5	7	0	0	7	2	0.0120799	0.760655	4.49707
ITPR2	150	68	0	0	68	54	0.0122114	0.760655	2.69631
RAB26	18	14	5	4	5	1	0.0122569	0.760655	3.93848
CDC42EP3	16	13	1	2	10	6	0.0123348	0.760655	2.83249
DNAL1	16	13	0	0	13	6	0.0123348	0.760655	4.58497
TICAM1	40	24	12	10	2	2	0.0126802	0.760655	0
LOC100131691	47	27	5	4	18	19	0.0127536	0.760655	-0.439576
UNK	122	57	0	0	57	57	0.013236	0.760655	0
THAP6	79	40	12	18	10	5	0.0137413	0.760655	3.66372
C14orf142	1	4	0	0	4	2	0.0140003	0.760655	1.99574
C1orf57	1	4	0	0	4	2	0.0140003	0.760655	1.99574
C3orf10	1	4	1	0	3	1	0.0140003	0.760655	2.07944
ESPL1	1	4	2	0	2	1	0.0140003	0.760655	1.04811
MAN2B2	1	4	0	1	3	0	0.0140003	0.760655	2.77259
PCSK7	1	4	0	0	4	0	0.0140003	0.760655	3.737
PITPNA	1	4	1	1	2	1	0.0140003	0.760655	1.04811
PPP1R15A	1	4	1	0	3	0	0.0140003	0.760655	2.77259
RAB40B	1	4	0	0	4	5	0.0140003	0.760655	-0.894632
RPS6KA4	1	4	1	1	2	2	0.0140003	0.760655	0
MYCL1	27	18	4	8	6	1	0.0141888	0.760655	4.76971
RASIP1	27	18	1	0	17	8	0.0141888	0.760655	5.0876
BATF3	0	3	1	0	2	1	0.0143125	0.760655	1.04811
C12orf44	0	3	0	2	1	0	0.0143125	0.760655	0.693147
C1orf103	0	3	1	0	2	1	0.0143125	0.760655	1.04811
C7orf51	0	3	0	2	1	1	0.0143125	0.760655	0
CCDC115	0	3	0	1	2	0	0.0143125	0.760655	1.74126
CDKN1A	0	3	0	0	3	0	0.0143125	0.760655	2.77259
CEMP1	0	3	1	2	0	0	0.0143125	0.760655	0
ESYT1	0	3	0	0	3	1	0.0143125	0.760655	2.07944
FAM181B	0	3	0	3	0	0	0.0143125	0.760655	0
GIPC1	0	3	0	0	3	0	0.0143125	0.760655	2.77259
GPX4	0	3	1	1	1	0	0.0143125	0.760655	0.693147
LMO1	0	3	0	1	2	0	0.0143125	0.760655	1.74126
MFAP2	0	3	0	0	3	0	0.0143125	0.760655	2.77259
MGC72080	0	3	0	0	3	0	0.0143125	0.760655	2.77259
PDLIM7	0	3	0	0	3	3	0.0143125	0.760655	0
PLXND1	0	3	1	1	1	0	0.0143125	0.760655	0.693147
RFX8	0	3	0	0	3	1	0.0143125	0.760655	2.07944
RORB	0	3	0	0	3	0	0.0143125	0.760655	2.77259
SLC35E1	0	3	1	0	2	3	0.0143125	0.760655	-1.03133
SNORD42B	0	3	2	1	0	0	0.0143125	0.760655	0
SNORD48	0	3	0	3	0	0	0.0143125	0.760655	0
SYT12	0	3	1	1	1	0	0.0143125	0.760655	0.693147
VDR	0	3	0	0	3	0	0.0143125	0.760655	2.77259
ZNF101	0	3	0	0	3	0	0.0143125	0.760655	2.77259
ZNF155	0	3	0	0	3	0	0.0143125	0.760655	2.77259
ZNF615	0	3	0	0	3	0	0.0143125	0.760655	2.77259
BCMO1	7	8	0	3	5	5	0.0144764	0.760655	0
ECH1	7	8	1	2	5	2	0.0144764	0.760655	2.89037
PPP1R14B	7	8	1	0	7	4	0.0144764	0.760655	2.50133
HSPC159	72	37	18	12	7	4	0.0147018	0.768893	2.50133
MIP	25	17	8	9	0	0	0.0148603	0.773567	0
UNC13C	55	30	0	0	30	32	0.0149454	0.774395	-0.625115
PBX1	48	27	1	1	25	18	0.0154077	0.784117	2.80672
NYX	41	24	12	8	4	0	0.0155652	0.784117	3.737
MUM1	65	34	8	8	18	15	0.0156369	0.784117	1.41741
AHSA2	9	9	5	4	0	0	0.0159894	0.784117	0
ARHGAP5	9	9	0	1	8	6	0.0159894	0.784117	1.50218
CHAF1A	9	9	0	0	9	7	0.0159894	0.784117	1.4107
DPP8	9	9	0	0	9	5	0.0159894	0.784117	3.01739
GCHFR	9	9	0	0	9	5	0.0159894	0.784117	3.01739
ULK4	9	9	0	0	9	2	0.0159894	0.784117	5.90776
COQ9	19	14	0	0	14	7	0.0166147	0.784117	4.34173
GSPT1	19	14	3	8	3	5	0.0166147	0.784117	-1.85904
ZMYM3	19	14	5	8	1	5	0.0166147	0.784117	-3.93848
COL11A1	11	10	2	0	8	5	0.0168414	0.784117	2.33341
LRRN1	11	10	1	0	9	3	0.0168414	0.784117	4.87643
RPL22	11	10	1	0	9	4	0.0168414	0.784117	3.91202
ELOVL6	68	35	2	3	30	19	0.0169949	0.784117	4.06531
SPTLC1	17	13	0	1	12	4	0.0170114	0.784117	5.75444
EIF4G3	106	50	1	1	48	32	0.0170248	0.784117	4.21368
ANO1	4	6	0	0	6	4	0.0170682	0.784117	1.72586
CD2BP2	4	6	1	0	5	2	0.0170682	0.784117	2.89037
CLCF1	4	6	0	3	3	1	0.0170682	0.784117	2.07944
FASN	4	6	0	1	5	3	0.0170682	0.784117	1.85904
TEX264	4	6	0	0	6	5	0.0170682	0.784117	0.831229
TUSC1	4	6	4	2	0	0	0.0170682	0.784117	0
FLJ39582	13	11	5	6	0	1	0.0172116	0.784117	-0.693147
OVCA2	13	11	3	3	5	4	0.0172116	0.784117	0.894632
SEMA4A	13	11	2	3	6	2	0.0172116	0.784117	3.7216
C12orf24	15	12	4	1	7	12	0.0172349	0.784117	-3.25312
OGFOD1	15	12	0	1	11	6	0.0172349	0.784117	3.44544
PPP4R2	15	12	0	0	12	1	0.0172349	0.784117	8.79829
DNAJC15	37	22	1	0	21	17	0.0177412	0.803883	1.73166
DDAH1	107	50	0	1	49	40	0.0192065	0.866771	2.18324
C14orf181	24	16	9	7	0	0	0.0201326	0.88499	0
CSNK1A1	24	16	0	1	15	7	0.0201326	0.88499	4.85203
FBXL22	33	20	2	4	14	7	0.0201716	0.88499	4.34173
SLAIN2	33	20	4	0	16	7	0.0201716	0.88499	5.34233
ARHGAP39	6	7	5	2	0	0	0.0207424	0.88499	0
CCDC86	6	7	2	1	4	0	0.0207424	0.88499	3.737
CCNL2	6	7	2	3	2	0	0.0207424	0.88499	1.74126
PDLIM2	6	7	2	5	0	1	0.0207424	0.88499	-0.693147
RIMS1	6	7	0	0	7	2	0.0207424	0.88499	4.49707
TNKS	22	15	0	1	14	15	0.0211192	0.88499	-0.510299
RAI1	45	25	0	0	25	24	0.0213049	0.88499	0.36649
ITSN1	95	45	1	1	43	23	0.0214961	0.88499	6.08827
COL4A5	20	14	2	1	11	3	0.0220592	0.88499	6.13571
C14orf176	29	18	6	4	8	7	0.0228507	0.88499	0.726712
ACAP3	8	8	0	0	8	2	0.0228746	0.88499	5.22378
AHNAK	8	8	0	0	8	6	0.0228746	0.88499	1.50218
FZD5	8	8	4	4	0	0	0.0228746	0.88499	0
LRDD	8	8	3	1	4	6	0.0228746	0.88499	-1.72586
UBE2V1	43	24	4	2	18	15	0.022875	0.88499	1.41741
COPS7A	18	13	4	5	4	1	0.0229132	0.88499	3.04385
HEXIM1	18	13	4	9	0	0	0.0229132	0.88499	0
RP1-177G6.2	18	13	5	2	6	8	0.0229132	0.88499	-1.50218
SMAD2	18	13	0	0	13	6	0.0229132	0.88499	4.58497
CIRBP	16	12	2	2	8	3	0.0236254	0.88499	4.19245
L3MBTL2	16	12	1	0	11	3	0.0236254	0.88499	6.13571
ARFGEF2	10	9	0	0	9	4	0.0239395	0.88499	3.91202
CDK4	10	9	4	2	3	1	0.0239395	0.88499	2.07944
CPNE7	10	9	1	2	6	2	0.0239395	0.88499	3.7216
FAM129B	10	9	0	0	9	3	0.0239395	0.88499	4.87643
FAM53C	10	9	0	0	9	5	0.0239395	0.88499	3.01739
FZD7	10	9	3	6	0	0	0.0239395	0.88499	0
PNKP	10	9	0	0	9	1	0.0239395	0.88499	6.95587
SMEK2	10	9	1	1	7	5	0.0239395	0.88499	1.60669
TRIM8	10	9	3	3	3	1	0.0239395	0.88499	2.07944
TCF12	154	67	3	2	62	31	0.0239676	0.88499	7.436
ALKBH3	3	5	2	2	1	2	0.0241152	0.88499	-1.04811
B4GALNT3	3	5	0	1	4	0	0.0241152	0.88499	3.737
BLOC1S3	3	5	2	3	0	2	0.0241152	0.88499	-1.74126
CES3	3	5	1	0	4	0	0.0241152	0.88499	3.737
EIF5	3	5	1	2	2	1	0.0241152	0.88499	1.04811
GTPBP8	3	5	0	0	5	3	0.0241152	0.88499	1.85904
ILVBL	3	5	0	0	5	1	0.0241152	0.88499	3.93848
LRFN4	3	5	2	3	0	0	0.0241152	0.88499	0
NBEAL2	3	5	0	0	5	2	0.0241152	0.88499	2.89037
NME3	3	5	1	2	2	0	0.0241152	0.88499	1.74126
PNMAL1	3	5	3	1	1	0	0.0241152	0.88499	0.693147
PRPF4B	3	5	0	1	4	1	0.0241152	0.88499	3.04385
PRUNE2	3	5	0	0	5	4	0.0241152	0.88499	0.894632
RAB24	3	5	1	4	0	0	0.0241152	0.88499	0
SLC10A4	3	5	1	2	2	1	0.0241152	0.88499	1.04811
SPC24	3	5	0	0	5	3	0.0241152	0.88499	1.85904
TEKT3	3	5	0	0	5	2	0.0241152	0.88499	2.89037
BCAS4	14	11	0	0	11	5	0.024117	0.88499	4.27667
EMILIN1	14	11	2	6	3	5	0.024117	0.88499	-1.85904
RTN4RL1	14	11	0	0	11	12	0.024117	0.88499	-0.583143
C16orf91	12	10	2	1	7	6	0.0242755	0.88499	0.775464
CCR10	12	10	7	2	1	1	0.0242755	0.88499	0
IPO11	12	10	0	0	10	7	0.0242755	0.88499	2.05703
ZNF362	12	10	0	0	10	9	0.0242755	0.88499	0.646333
GRIK2	73	36	0	0	36	30	0.0244762	0.889407	1.79826
COL4A3	91	43	8	11	24	28	0.0248234	0.898615	-1.41026
NR2F2	34	20	3	5	12	8	0.0248901	0.898615	2.5264
OMG	107	49	23	19	7	5	0.026009	0.915399	1.60669
CLSTN1	32	19	0	2	17	9	0.0266222	0.915399	4.40361
SLC39A1	54	28	1	0	27	8	0.0284557	0.915399	9.05405
SPRYD4	30	18	6	4	8	3	0.0284576	0.915399	4.19245
ATP5D	5	6	1	3	2	1	0.0299184	0.915399	1.04811
CASKIN2	5	6	2	0	4	3	0.0299184	0.915399	0.96441
ESRP1	5	6	2	0	4	0	0.0299184	0.915399	3.737
FMNL2	5	6	1	0	5	2	0.0299184	0.915399	2.89037
GFM1	5	6	0	0	6	3	0.0299184	0.915399	2.69027
GGA3	5	6	0	2	4	3	0.0299184	0.915399	0.96441
LOC100126784	5	6	2	4	0	0	0.0299184	0.915399	0
LOC100130581	5	6	4	2	0	1	0.0299184	0.915399	-0.693147
LOC221710	5	6	0	0	6	2	0.0299184	0.915399	3.7216
NEUROG2	5	6	4	2	0	0	0.0299184	0.915399	0
RBP1	5	6	0	2	4	1	0.0299184	0.915399	3.04385
TANK	5	6	0	0	6	5	0.0299184	0.915399	0.831229
TMEM9B	5	6	1	1	4	0	0.0299184	0.915399	3.737
UBQLN2	5	6	6	0	0	0	0.0299184	0.915399	0
ZNF764	5	6	1	2	3	1	0.0299184	0.915399	2.07944
CHD7	19	13	0	2	11	3	0.0302044	0.915399	6.13571
ATP5G2	47	25	0	6	19	16	0.0302431	0.915399	1.36669
FSIP1	28	17	0	0	17	13	0.0303961	0.915399	2.00481
UHRF1	28	17	6	9	2	5	0.0303961	0.915399	-2.89037
ATRNL1	17	12	7	3	2	2	0.0315953	0.915399	0
BAT4	17	12	6	4	2	1	0.0315953	0.915399	1.04811
TADA2A	17	12	5	3	4	5	0.0315953	0.915399	-0.894632
CARM1	75	36	0	0	36	37	0.0320749	0.915399	-0.27888
LTBP4	26	16	1	0	15	10	0.0324345	0.915399	2.795
COX5A	15	11	0	0	11	4	0.0328316	0.915399	5.1713
KISS1R	15	11	0	4	7	6	0.0328316	0.915399	0.775464
LRRC14	15	11	7	4	0	0	0.0328316	0.915399	0
PRR7	15	11	2	4	5	8	0.0328316	0.915399	-2.33341
SLC7A14	15	11	1	1	9	7	0.0328316	0.915399	1.4107
ARHGAP19	7	7	0	0	7	1	0.0329237	0.915399	5.54518
B4GALT2	7	7	0	2	5	9	0.0329237	0.915399	-3.01739
C12orf35	7	7	0	1	6	0	0.0329237	0.915399	5.46286
CCDC88C	7	7	1	0	6	4	0.0329237	0.915399	1.72586
DBF4	7	7	2	1	4	6	0.0329237	0.915399	-1.72586
EXOSC5	7	7	0	1	6	1	0.0329237	0.915399	4.76971
FNBP4	7	7	0	1	6	5	0.0329237	0.915399	0.831229
HTRA2	7	7	2	3	2	0	0.0329237	0.915399	1.74126
NUDT21	7	7	1	3	3	2	0.0329237	0.915399	1.03133
ROR2	7	7	0	0	7	2	0.0329237	0.915399	4.49707
TDGF1	7	7	0	0	7	1	0.0329237	0.915399	5.54518
KAZALD1	55	28	10	10	8	12	0.0332412	0.915399	-2.5264
ANKRD34A	13	10	5	3	2	2	0.0338016	0.915399	0
ARID1A	13	10	4	1	5	3	0.0338016	0.915399	1.85904
CTNND1	13	10	3	0	7	2	0.0338016	0.915399	4.49707
DCLRE1A	13	10	3	6	1	1	0.0338016	0.915399	0
SCN1A	13	10	2	1	7	3	0.0338016	0.915399	3.46574
ZNF576	13	10	2	0	8	0	0.0338016	0.915399	6.96504
AMPD2	2	4	1	0	3	0	0.0339245	0.915399	2.77259
AMZ2P1	2	4	2	0	2	0	0.0339245	0.915399	1.74126
AP3B2	2	4	1	0	3	0	0.0339245	0.915399	2.77259
ARRDC4	2	4	0	1	3	1	0.0339245	0.915399	2.07944
BICD2	2	4	0	0	4	0	0.0339245	0.915399	3.737
BRD7	2	4	0	0	4	1	0.0339245	0.915399	3.04385
C10orf55	2	4	3	1	0	0	0.0339245	0.915399	0
C12orf60	2	4	0	0	4	1	0.0339245	0.915399	3.04385
C7orf64	2	4	0	0	4	0	0.0339245	0.915399	3.737
CBX2	2	4	1	0	3	1	0.0339245	0.915399	2.07944
CD99L2	2	4	0	0	4	3	0.0339245	0.915399	0.96441
CDC5L	2	4	0	0	4	2	0.0339245	0.915399	1.99574
CTSB	2	4	0	0	4	0	0.0339245	0.915399	3.737
ECT2L	2	4	0	1	3	0	0.0339245	0.915399	2.77259
FLNB	2	4	0	0	4	0	0.0339245	0.915399	3.737
FOSB	2	4	1	1	2	1	0.0339245	0.915399	1.04811
HIST1H1D	2	4	2	2	0	0	0.0339245	0.915399	0
HOXA9	2	4	1	2	1	0	0.0339245	0.915399	0.693147
KIDINS220	2	4	0	0	4	1	0.0339245	0.915399	3.04385
LOC100190938	2	4	1	0	3	0	0.0339245	0.915399	2.77259
LOC100303728	2	4	1	3	0	0	0.0339245	0.915399	0
LOC81691	2	4	0	0	4	0	0.0339245	0.915399	3.737
NAPG	2	4	0	1	3	1	0.0339245	0.915399	2.07944
NCAPG2	2	4	0	0	4	1	0.0339245	0.915399	3.04385
NETO2	2	4	0	0	4	1	0.0339245	0.915399	3.04385
NR2C1	2	4	0	0	4	1	0.0339245	0.915399	3.04385
PGD	2	4	0	0	4	4	0.0339245	0.915399	0
PTDSS1	2	4	1	0	3	0	0.0339245	0.915399	2.77259
SCARF2	2	4	1	0	3	4	0.0339245	0.915399	-0.96441
SLC25A1	2	4	1	1	2	4	0.0339245	0.915399	-1.99574
SNORD46	2	4	0	4	0	0	0.0339245	0.915399	0
STK36	2	4	0	2	2	0	0.0339245	0.915399	1.74126
TFCP2L1	2	4	0	0	4	1	0.0339245	0.915399	3.04385
TMEM14B	2	4	0	0	4	1	0.0339245	0.915399	3.04385
TTC25	2	4	3	0	1	2	0.0339245	0.915399	-1.04811
ZNF643	2	4	0	3	1	1	0.0339245	0.915399	0
C1orf56	9	8	5	3	0	2	0.0341797	0.915399	-1.74126
C5orf44	9	8	2	1	5	2	0.0341797	0.915399	2.89037
DLG5	9	8	1	1	6	6	0.0341797	0.915399	0
LIFR	9	8	0	0	8	3	0.0341797	0.915399	4.19245
NT5M	9	8	1	1	6	3	0.0341797	0.915399	2.69027
PPP1R3E	9	8	1	3	4	0	0.0341797	0.915399	3.737
ANKRD31	11	9	1	1	7	3	0.0343372	0.915399	3.46574
CCDC58	11	9	0	0	9	4	0.0343372	0.915399	3.91202
COQ5	11	9	1	0	8	1	0.0343372	0.915399	6.27189
DLX5	11	9	0	3	6	0	0.0343372	0.915399	5.46286
FAM119A	11	9	1	3	5	3	0.0343372	0.915399	1.85904
NDUFAF3	11	9	3	4	2	6	0.0343372	0.915399	-3.7216
POLR3K	11	9	0	0	9	8	0.0343372	0.915399	0.683985
SLC35C1	11	9	4	5	0	1	0.0343372	0.915399	-0.693147
SMG5	11	9	1	1	7	6	0.0343372	0.915399	0.775464
ZBTB10	11	9	3	2	4	4	0.0343372	0.915399	0
SLC38A1	24	15	4	3	8	9	0.0345651	0.915399	-0.683985
NUDT2	43	23	0	0	23	10	0.0351271	0.915399	6.2759
P4HTM	48	25	9	3	13	8	0.0356596	0.915399	3.08279
TRPM3	183	76	2	0	74	92	0.035804	0.915399	-2.74654
ATXN3	22	14	6	5	3	2	0.0367741	0.915399	1.03133
DGKZ	22	14	0	0	14	7	0.0367741	0.915399	4.34173
LOC388796	22	14	3	3	8	3	0.0367741	0.915399	4.19245
MTDH	22	14	3	0	11	7	0.0367741	0.915399	2.66997
PROCA1	22	14	1	1	12	9	0.0367741	0.915399	1.84242
DCBLD1	36	20	0	0	20	14	0.0367791	0.915399	2.79245
FAM78A	113	50	7	10	33	30	0.0374222	0.915399	0.927581
C1orf43	66	32	3	4	25	17	0.037825	0.915399	3.26185
MARCH1	192	79	0	0	79	68	0.0379887	0.915399	1.83871
FAM20B	20	13	0	0	13	3	0.0390377	0.915399	7.27524
TAL1	20	13	0	2	11	11	0.0390377	0.915399	0
MICALCL	74	35	2	2	31	23	0.0393035	0.915399	2.75742
MYH15	34	19	1	0	18	13	0.0396043	0.915399	2.45994
FLJ13224	27	16	9	7	0	0	0.0403201	0.915399	0
MAP4K4	27	16	1	0	15	4	0.0403201	0.915399	7.35336
TMEM189-UBE2V1	64	31	0	0	31	27	0.0407857	0.915399	1.30959
POMGNT1	18	12	0	0	12	13	0.0413179	0.915399	-0.556387
AKT1S1	44	23	7	6	10	16	0.0415315	0.915399	-3.2853
TFAP2C	44	23	3	2	18	17	0.0415315	0.915399	0.45513
KDM2B	144	61	11	6	44	39	0.042582	0.915399	1.27368
HIGD2B	32	18	3	1	14	8	0.0426531	0.915399	3.61502
NUAK1	32	18	0	1	17	18	0.0426531	0.915399	-0.45513
XPO1	32	18	6	6	6	3	0.0426531	0.915399	2.69027
ZCCHC8	32	18	0	1	17	12	0.0426531	0.915399	2.56119
ATF4	4	5	4	1	0	0	0.0435306	0.915399	0
CHRNB1	4	5	1	3	1	1	0.0435306	0.915399	0
CREB3L1	4	5	0	0	5	5	0.0435306	0.915399	0
CSF1	4	5	2	1	2	0	0.0435306	0.915399	1.74126
ERO1L	4	5	0	0	5	3	0.0435306	0.915399	1.85904
LOC153684	4	5	1	4	0	0	0.0435306	0.915399	0
LOH12CR2	4	5	3	2	0	0	0.0435306	0.915399	0
MED9	4	5	1	1	3	5	0.0435306	0.915399	-1.85904
MMP20	4	5	1	0	4	1	0.0435306	0.915399	3.04385
NEK1	4	5	2	1	2	3	0.0435306	0.915399	-1.03133
NFKBIA	4	5	2	1	2	1	0.0435306	0.915399	1.04811
PPIP5K1	4	5	0	0	5	2	0.0435306	0.915399	2.89037
RAB8A	4	5	0	1	4	4	0.0435306	0.915399	0
RBM24	4	5	2	1	2	0	0.0435306	0.915399	1.74126
REPIN1	4	5	0	3	2	5	0.0435306	0.915399	-2.89037
SAMD11	4	5	0	2	3	2	0.0435306	0.915399	1.03133
SAV1	4	5	0	0	5	2	0.0435306	0.915399	2.89037
THAP11	4	5	1	4	0	0	0.0435306	0.915399	0
TRPM4	4	5	0	0	5	1	0.0435306	0.915399	3.93848
USP8	4	5	1	1	3	2	0.0435306	0.915399	1.03133
MAGEC3	16	11	0	0	11	2	0.0435543	0.915399	7.16704
PRKCE	16	11	2	2	7	7	0.0435543	0.915399	0
AP4S1	14	10	0	1	9	2	0.0456517	0.915399	5.90776
C19orf39	14	10	2	4	4	2	0.0456517	0.915399	1.99574
HYAL1	14	10	5	4	1	2	0.0456517	0.915399	-1.04811
IGFBP5	14	10	3	4	3	6	0.0456517	0.915399	-2.69027
ITGA2	14	10	0	0	10	4	0.0456517	0.915399	4.55836
MASTL	14	10	2	3	5	2	0.0456517	0.915399	2.89037
MTA1	14	10	0	0	10	3	0.0456517	0.915399	5.52277
NIP7	14	10	4	4	2	0	0.0456517	0.915399	1.74126
TMEM220	14	10	2	4	4	3	0.0456517	0.915399	0.96441
PPFIBP2	214	86	1	0	85	80	0.0460674	0.915399	0.764667
IQCG	23	14	1	0	13	12	0.0463032	0.915399	0.556387
PLEKHG4	23	14	6	8	0	0	0.0463032	0.915399	0
ZBTB38	23	14	0	0	14	11	0.0463032	0.915399	1.67176
ANXA5	1	3	0	0	3	3	0.0468247	0.915399	0
ARSJ	1	3	0	2	1	1	0.0468247	0.915399	0
ASAM	1	3	2	0	1	0	0.0468247	0.915399	0.693147
ASTN1	1	3	0	0	3	0	0.0468247	0.915399	2.77259
BHLHE22	1	3	1	2	0	0	0.0468247	0.915399	0
BNIPL	1	3	2	1	0	0	0.0468247	0.915399	0
BOK	1	3	0	0	3	0	0.0468247	0.915399	2.77259
C4orf3	1	3	0	1	2	0	0.0468247	0.915399	1.74126
C6orf203	1	3	2	0	1	2	0.0468247	0.915399	-1.04811
CKLF	1	3	1	1	1	2	0.0468247	0.915399	-1.04811
CLP1	1	3	0	0	3	2	0.0468247	0.915399	1.03133
COX6B2	1	3	1	2	0	0	0.0468247	0.915399	0
DAPK3	1	3	2	0	1	0	0.0468247	0.915399	0.693147
DBN1	1	3	0	0	3	2	0.0468247	0.915399	1.03133
DLX2	1	3	2	1	0	0	0.0468247	0.915399	0
DNAJC18	1	3	0	0	3	1	0.0468247	0.915399	2.07944
DUSP1	1	3	1	0	2	0	0.0468247	0.915399	1.74126
DUSP3	1	3	0	1	2	2	0.0468247	0.915399	0
EHBP1L1	1	3	0	0	3	1	0.0468247	0.915399	2.07944
FAM40B	1	3	0	0	3	0	0.0468247	0.915399	2.77259
FIBP	1	3	2	0	1	0	0.0468247	0.915399	0.693147
FLJ16779	1	3	2	1	0	0	0.0468247	0.915399	0
GALM	1	3	1	1	1	1	0.0468247	0.915399	0
GEMIN8P4	1	3	1	2	0	0	0.0468247	0.915399	0
GNG11	1	3	1	2	0	0	0.0468247	0.915399	0
GNL2	1	3	1	0	2	1	0.0468247	0.915399	1.04811
HHLA3	1	3	1	0	2	1	0.0468247	0.915399	1.04811
IL17RD	1	3	0	0	3	1	0.0468247	0.915399	2.07944
KCNG1	1	3	0	1	2	1	0.0468247	0.915399	1.04811
KCTD19	1	3	0	0	3	0	0.0468247	0.915399	2.77259
KHSRP	1	3	0	0	3	0	0.0468247	0.915399	2.77259
LIMK1	1	3	1	0	2	2	0.0468247	0.915399	0
LOC253039	1	3	3	0	0	0	0.0468247	0.915399	0
LOC729609	1	3	1	2	0	0	0.0468247	0.915399	0
MAF	1	3	2	1	0	0	0.0468247	0.915399	0
METTL5	1	3	0	1	2	0	0.0468247	0.915399	1.74126
NDUFA5	1	3	0	1	2	1	0.0468247	0.915399	1.04811
NKX2-3	1	3	0	3	0	0	0.0468247	0.915399	0
PCYOX1L	1	3	0	0	3	1	0.0468247	0.915399	2.07944
PIGA	1	3	0	0	3	1	0.0468247	0.915399	2.07944
PIP4K2C	1	3	1	0	2	1	0.0468247	0.915399	1.04811
RABGEF1	1	3	0	0	3	0	0.0468247	0.915399	2.77259
RAP2B	1	3	0	3	0	0	0.0468247	0.915399	0
RPL28	1	3	0	1	2	0	0.0468247	0.915399	1.74126
SLC9A1	1	3	3	0	0	1	0.0468247	0.915399	-0.693147
SPRED1	1	3	0	1	2	1	0.0468247	0.915399	1.04811
SUCLG1	1	3	0	0	3	0	0.0468247	0.915399	2.77259
THOC6	1	3	0	0	3	0	0.0468247	0.915399	2.77259
TMEM145	1	3	0	2	1	0	0.0468247	0.915399	0.693147
TSPAN11	1	3	0	0	3	0	0.0468247	0.915399	2.77259
CAMSAP1L1	12	9	1	1	7	4	0.047459	0.915399	2.50133
ELP3	12	9	0	0	9	7	0.047459	0.915399	1.4107
FAM13B	12	9	0	1	8	3	0.047459	0.915399	4.19245
NOG	12	9	5	4	0	0	0.047459	0.915399	0
SERBP1	12	9	1	0	8	4	0.047459	0.915399	3.22804
TSPAN3	12	9	0	1	8	2	0.047459	0.915399	5.22378
ENOSF1	35	19	0	0	19	7	0.0475919	0.915399	6.70901
FAHD1	6	6	2	2	2	2	0.047757	0.915399	0
FAM113A	6	6	1	3	2	1	0.047757	0.915399	1.04811
GPN3	6	6	1	3	2	0	0.047757	0.915399	1.74126
HAAO	6	6	1	1	4	3	0.047757	0.915399	0.96441
ICAM3	6	6	3	3	0	0	0.047757	0.915399	0
KRIT1	6	6	3	1	2	4	0.047757	0.915399	-1.99574
LOC100128164	6	6	2	3	1	0	0.047757	0.915399	0.693147
LOC26102	6	6	3	3	0	0	0.047757	0.915399	0
LRSAM1	6	6	1	4	1	1	0.047757	0.915399	0
MFI2	6	6	0	4	2	5	0.047757	0.915399	-2.89037
PITPNM3	6	6	4	2	0	0	0.047757	0.915399	0
QARS	6	6	1	2	3	2	0.047757	0.915399	1.03133
SPOCK1	6	6	0	0	6	4	0.047757	0.915399	1.72586
THUMPD3	6	6	0	0	6	2	0.047757	0.915399	3.7216
ZFP91	6	6	1	1	4	6	0.047757	0.915399	-1.72586
ZFP91-CNTF	6	6	1	1	4	6	0.047757	0.915399	-1.72586
DOCK4	10	8	1	0	7	0	0.048732	0.915399	6.23832
LOC401431	10	8	0	1	7	2	0.048732	0.915399	4.49707
MGST2	10	8	2	0	6	2	0.048732	0.915399	3.7216
PRDX3	10	8	0	0	8	3	0.048732	0.915399	4.19245
SFRS14	10	8	0	0	8	2	0.048732	0.915399	5.22378
SLC35F5	10	8	0	1	7	5	0.048732	0.915399	1.60669
TNS4	10	8	4	0	4	0	0.048732	0.915399	3.737
ABHD15	8	7	5	1	1	0	0.0490651	0.915399	0.693147
AKAP10	8	7	0	0	7	7	0.0490651	0.915399	0
C10orf2	8	7	4	3	0	0	0.0490651	0.915399	0
C16orf72	8	7	2	0	5	2	0.0490651	0.915399	2.89037
LDHB	8	7	0	0	7	2	0.0490651	0.915399	4.49707
LOC100288428	8	7	0	2	5	4	0.0490651	0.915399	0.894632
LOC645676	8	7	4	3	0	0	0.0490651	0.915399	0
MAGEF1	8	7	4	3	0	0	0.0490651	0.915399	0
NEBL	8	7	0	1	6	1	0.0490651	0.915399	4.76971
PDPK1	8	7	3	4	0	0	0.0490651	0.915399	0
SLC27A5	8	7	1	3	3	1	0.0490651	0.915399	2.07944
TMEM63A	8	7	2	2	3	2	0.0490651	0.915399	1.03133
ZDHHC2	8	7	0	0	7	5	0.0490651	0.915399	1.60669
C16orf45	28	16	0	0	16	10	0.0494896	0.915399	3.2853
ITPKB	28	16	1	0	15	11	0.0494896	0.915399	2.18206
HNRNPD	21	13	2	2	9	4	0.0495482	0.915399	3.91202
MEG3	58	28	4	3	21	21	0.0512544	0.915399	0
SRGAP1	119	51	1	3	47	40	0.0519165	0.915399	1.72486
C1QBP	19	12	1	0	11	9	0.0529419	0.915399	1.25928
RASSF1	19	12	0	1	11	5	0.0529419	0.915399	4.27667
ITM2C	26	15	0	0	15	11	0.0533123	0.915399	2.18206
MYOM1	69	32	0	0	32	27	0.0557137	0.915399	1.61867
EIF4E	17	11	2	6	3	5	0.0564494	0.915399	-1.85904
PIGU	17	11	0	0	11	3	0.0564494	0.915399	6.13571
TRIM65	17	11	2	2	7	7	0.0564494	0.915399	0
ST3GAL2	36	19	6	6	7	6	0.0566642	0.915399	0.775464
AEBP2	41	21	1	1	19	15	0.0570259	0.915399	1.85698
TMCC1	41	21	3	3	15	7	0.0570259	0.915399	4.85203
AANAT	0	2	0	0	2	1	0.0589483	0.915399	1.04811
ADM2	0	2	0	0	2	0	0.0589483	0.915399	1.74126
ANKMY1	0	2	0	0	2	0	0.0589483	0.915399	1.74126
ANKRD52	0	2	1	1	0	0	0.0589483	0.915399	0
APOBEC3F	0	2	0	0	2	1	0.0589483	0.915399	1.04811
ARHGAP20	0	2	0	0	2	0	0.0589483	0.915399	1.74126
ASL	0	2	0	0	2	1	0.0589483	0.915399	1.04811
ATP13A3	0	2	0	0	2	0	0.0589483	0.915399	1.74126
C10orf113	0	2	0	0	2	0	0.0589483	0.915399	1.74126
C14orf148	0	2	0	0	2	1	0.0589483	0.915399	1.04811
C1orf133	0	2	0	1	1	0	0.0589483	0.915399	0.693147
C1QL1	0	2	1	0	1	0	0.0589483	0.915399	0.693147
C22orf40	0	2	0	0	2	0	0.0589483	0.915399	1.74126
C2CD4A	0	2	2	0	0	0	0.0589483	0.915399	0
C7orf45	0	2	2	0	0	1	0.0589483	0.915399	-0.693147
C9orf21	0	2	0	0	2	0	0.0589483	0.915399	1.74126
CAPN10	0	2	0	0	2	1	0.0589483	0.915399	1.04811
CCDC28A	0	2	0	1	1	0	0.0589483	0.915399	0.693147
CCDC39	0	2	0	0	2	0	0.0589483	0.915399	1.74126
CD9	0	2	0	0	2	0	0.0589483	0.915399	1.74126
CHTF18	0	2	0	0	2	0	0.0589483	0.915399	1.74126
CLCN1	0	2	0	0	2	0	0.0589483	0.915399	1.74126
CNRIP1	0	2	1	0	1	0	0.0589483	0.915399	0.693147
CNTFR	0	2	0	0	2	2	0.0589483	0.915399	0
COX6C	0	2	0	0	2	1	0.0589483	0.915399	1.04811
CRABP1	0	2	0	1	1	0	0.0589483	0.915399	0.693147
DDIT4	0	2	1	0	1	1	0.0589483	0.915399	0
DGCR5	0	2	0	0	2	0	0.0589483	0.915399	1.74126
DLEC1	0	2	0	1	1	1	0.0589483	0.915399	0
DNHD1	0	2	0	0	2	1	0.0589483	0.915399	1.04811
DPT	0	2	0	0	2	0	0.0589483	0.915399	1.74126
DUOXA1	0	2	1	1	0	0	0.0589483	0.915399	0
EVI5L	0	2	0	0	2	0	0.0589483	0.915399	1.74126
FAM194A	0	2	1	0	1	0	0.0589483	0.915399	0.693147
FLJ41350	0	2	1	0	1	0	0.0589483	0.915399	0.693147
FLJ46111	0	2	2	0	0	0	0.0589483	0.915399	0
FSIP2	0	2	1	0	1	0	0.0589483	0.915399	0.693147
GABBR1	0	2	0	1	1	2	0.0589483	0.915399	-1.04811
GABRB2	0	2	0	0	2	0	0.0589483	0.915399	1.74126
GAL3ST4	0	2	1	1	0	0	0.0589483	0.915399	0
GFI1	0	2	0	0	2	0	0.0589483	0.915399	1.74126
GINS4	0	2	0	1	1	0	0.0589483	0.915399	0.693147
GLYATL3	0	2	0	0	2	0	0.0589483	0.915399	1.74126
GPER	0	2	0	1	1	1	0.0589483	0.915399	0
GTSE1	0	2	0	0	2	1	0.0589483	0.915399	1.04811
H2AFZ	0	2	0	1	1	1	0.0589483	0.915399	0
HACL1	0	2	0	0	2	0	0.0589483	0.915399	1.74126
HHLA2	0	2	0	0	2	0	0.0589483	0.915399	1.74126
HMX2	0	2	1	1	0	0	0.0589483	0.915399	0
HSPA5	0	2	1	0	1	0	0.0589483	0.915399	0.693147
HTRA4	0	2	0	0	2	0	0.0589483	0.915399	1.74126
IL1RAP	0	2	0	0	2	1	0.0589483	0.915399	1.04811
IRAK4	0	2	1	0	1	0	0.0589483	0.915399	0.693147
ISG15	0	2	2	0	0	0	0.0589483	0.915399	0
ISG20L2	0	2	0	2	0	0	0.0589483	0.915399	0
JAK3	0	2	1	1	0	2	0.0589483	0.915399	-1.74126
JPH3	0	2	1	1	0	0	0.0589483	0.915399	0
KCNJ12	0	2	0	0	2	0	0.0589483	0.915399	1.74126
KRT72	0	2	1	0	1	0	0.0589483	0.915399	0.693147
LOC100130872	0	2	1	0	1	1	0.0589483	0.915399	0
LOC100130872-SPON2	0	2	0	0	2	1	0.0589483	0.915399	1.04811
LOC148709	0	2	0	0	2	0	0.0589483	0.915399	1.74126
LOC389333	0	2	1	1	0	0	0.0589483	0.915399	0
LOC643763	0	2	1	1	0	0	0.0589483	0.915399	0
MTERF	0	2	0	0	2	0	0.0589483	0.915399	1.74126
MYO16	0	2	0	1	1	1	0.0589483	0.915399	0
NCRNA00094	0	2	0	1	1	0	0.0589483	0.915399	0.693147
NCRNA00176	0	2	1	1	0	0	0.0589483	0.915399	0
NOV	0	2	0	2	0	0	0.0589483	0.915399	0
NRK	0	2	0	0	2	0	0.0589483	0.915399	1.74126
NSUN4	0	2	0	0	2	1	0.0589483	0.915399	1.04811
NTRK1	0	2	0	1	1	1	0.0589483	0.915399	0
NUMBL	0	2	0	1	1	3	0.0589483	0.915399	-2.07944
OAF	0	2	0	0	2	0	0.0589483	0.915399	1.74126
PACRGL	0	2	0	0	2	1	0.0589483	0.915399	1.04811
POC1B	0	2	0	0	2	0	0.0589483	0.915399	1.74126
PPP1R3D	0	2	1	1	0	0	0.0589483	0.915399	0
PRRX1	0	2	0	0	2	0	0.0589483	0.915399	1.74126
PTGIS	0	2	0	0	2	2	0.0589483	0.915399	0
RAD9A	0	2	0	0	2	0	0.0589483	0.915399	1.74126
RASSF6	0	2	0	0	2	0	0.0589483	0.915399	1.74126
RHOF	0	2	0	0	2	0	0.0589483	0.915399	1.74126
SERPINE1	0	2	1	1	0	0	0.0589483	0.915399	0
SLC24A2	0	2	0	0	2	0	0.0589483	0.915399	1.74126
SLCO1C1	0	2	0	1	1	0	0.0589483	0.915399	0.693147
SNORD15A	0	2	0	2	0	0	0.0589483	0.915399	0
SPARC	0	2	0	0	2	0	0.0589483	0.915399	1.74126
SPI1	0	2	0	0	2	0	0.0589483	0.915399	1.74126
ST8SIA5	0	2	1	1	0	0	0.0589483	0.915399	0
SYT11	0	2	1	0	1	0	0.0589483	0.915399	0.693147
TBKBP1	0	2	1	1	0	0	0.0589483	0.915399	0
TLL2	0	2	0	0	2	1	0.0589483	0.915399	1.04811
TMPRSS7	0	2	0	0	2	1	0.0589483	0.915399	1.04811
TOLLIP	0	2	0	0	2	1	0.0589483	0.915399	1.04811
TPM2	0	2	0	1	1	0	0.0589483	0.915399	0.693147
TRIM28	0	2	1	0	1	0	0.0589483	0.915399	0.693147
TRIM3	0	2	0	0	2	2	0.0589483	0.915399	0
VRK3	0	2	0	0	2	0	0.0589483	0.915399	1.74126
WDR1	0	2	1	0	1	3	0.0589483	0.915399	-2.07944
YTHDF1	0	2	0	0	2	2	0.0589483	0.915399	0
ZBTB22	0	2	2	0	0	0	0.0589483	0.915399	0
ZDHHC4	0	2	0	0	2	2	0.0589483	0.915399	0
ZNF23	0	2	2	0	0	0	0.0589483	0.915399	0
ZNF554	0	2	0	0	2	0	0.0589483	0.915399	1.74126
ZNF555	0	2	0	0	2	0	0.0589483	0.915399	1.74126
ZNF707	0	2	0	0	2	0	0.0589483	0.915399	1.74126
ZNF831	0	2	1	0	1	0	0.0589483	0.915399	0.693147
AARSD1	15	10	2	3	5	8	0.0600081	0.915399	-2.33341
CD247	15	10	2	5	3	3	0.0600081	0.915399	0
FZD6	15	10	2	3	5	4	0.0600081	0.915399	0.894632
KALRN	15	10	0	0	10	3	0.0600081	0.915399	5.52277
NAPEPLD	15	10	3	3	4	5	0.0600081	0.915399	-0.894632
DDB2	67	31	2	3	26	16	0.0600683	0.915399	4.09068
CDH4	49	24	0	0	24	15	0.0608228	0.915399	3.85764
EBF3	91	40	0	0	40	24	0.0611109	0.915399	4.94766
TAOK1	34	18	0	1	17	12	0.0613286	0.915399	2.56119
TMEM26	44	22	7	4	11	9	0.0615032	0.915399	1.25928
C7orf44	39	20	2	0	18	10	0.0617331	0.915399	4.21241
BPTF	13	9	1	2	6	7	0.063509	0.915399	-0.775464
C6orf130	13	9	1	4	4	6	0.063509	0.915399	-1.72586
DNAH7	13	9	0	0	9	7	0.063509	0.915399	1.4107
INCA1	13	9	3	4	2	0	0.063509	0.915399	1.74126
JUP	13	9	1	0	8	3	0.063509	0.915399	4.19245
LOC139201	13	9	3	1	5	1	0.063509	0.915399	3.93848
LSM4	13	9	0	0	9	10	0.063509	0.915399	-0.646333
MT1E	13	9	1	2	6	4	0.063509	0.915399	1.72586
SOX2OT	124	52	3	3	46	33	0.0639061	0.915399	3.44576
ARHGEF17	3	4	1	3	0	1	0.0640978	0.915399	-0.693147
ARL5A	3	4	0	0	4	0	0.0640978	0.915399	3.737
ARL6IP6	3	4	0	1	3	0	0.0640978	0.915399	2.77259
BPGM	3	4	0	0	4	1	0.0640978	0.915399	3.04385
C11orf52	3	4	2	2	0	0	0.0640978	0.915399	0
C16orf75	3	4	0	0	4	4	0.0640978	0.915399	0
C19orf20	3	4	2	0	2	3	0.0640978	0.915399	-1.03133
C1orf183	3	4	0	0	4	3	0.0640978	0.915399	0.96441
C2orf43	3	4	0	0	4	2	0.0640978	0.915399	1.99574
CDC25C	3	4	0	1	3	0	0.0640978	0.915399	2.77259
CGN	3	4	1	0	3	0	0.0640978	0.915399	2.77259
CIT	3	4	0	0	4	4	0.0640978	0.915399	0
CXXC1	3	4	0	3	1	2	0.0640978	0.915399	-1.04811
DBNDD1	3	4	0	0	4	3	0.0640978	0.915399	0.96441
DCLRE1C	3	4	1	0	3	2	0.0640978	0.915399	1.03133
DHX57	3	4	0	0	4	0	0.0640978	0.915399	3.737
DOM3Z	3	4	0	1	3	1	0.0640978	0.915399	2.07944
ELAVL3	3	4	2	2	0	0	0.0640978	0.915399	0
FLT3LG	3	4	0	1	3	2	0.0640978	0.915399	1.03133
GRHL2	3	4	0	0	4	1	0.0640978	0.915399	3.04385
HM13	3	4	0	0	4	4	0.0640978	0.915399	0
HSD17B8	3	4	1	2	1	1	0.0640978	0.915399	0
HTR7P1	3	4	2	2	0	0	0.0640978	0.915399	0
IGF2R	3	4	0	0	4	4	0.0640978	0.915399	0
KDELR1	3	4	1	0	3	4	0.0640978	0.915399	-0.96441
KLHDC8B	3	4	0	0	4	0	0.0640978	0.915399	3.737
LATS2	3	4	0	0	4	4	0.0640978	0.915399	0
LOC100302401	3	4	3	1	0	0	0.0640978	0.915399	0
MCM3APAS	3	4	0	0	4	4	0.0640978	0.915399	0
MEA1	3	4	1	3	0	0	0.0640978	0.915399	0
NAB1	3	4	0	0	4	4	0.0640978	0.915399	0
NCEH1	3	4	0	0	4	4	0.0640978	0.915399	0
NICN1	3	4	0	1	3	3	0.0640978	0.915399	0
NKRF	3	4	0	0	4	1	0.0640978	0.915399	3.04385
PALMD	3	4	0	0	4	0	0.0640978	0.915399	3.737
PCDHGA1	3	4	0	0	4	0	0.0640978	0.915399	3.737
PCDHGA2	3	4	0	0	4	0	0.0640978	0.915399	3.737
PCDHGA3	3	4	0	0	4	0	0.0640978	0.915399	3.737
PCDHGA4	3	4	0	0	4	0	0.0640978	0.915399	3.737
PCDHGA5	3	4	0	0	4	0	0.0640978	0.915399	3.737
PCDHGA6	3	4	0	0	4	0	0.0640978	0.915399	3.737
PCDHGA7	3	4	0	0	4	0	0.0640978	0.915399	3.737
PCDHGA8	3	4	0	0	4	0	0.0640978	0.915399	3.737
PCDHGB1	3	4	0	0	4	0	0.0640978	0.915399	3.737
PCDHGB2	3	4	0	0	4	0	0.0640978	0.915399	3.737
PCDHGB3	3	4	0	0	4	0	0.0640978	0.915399	3.737
PCDHGB4	3	4	0	0	4	0	0.0640978	0.915399	3.737
PCDHGB5	3	4	0	0	4	0	0.0640978	0.915399	3.737
PPPDE1	3	4	0	0	4	0	0.0640978	0.915399	3.737
PXMP4	3	4	1	0	3	3	0.0640978	0.915399	0
RDM1	3	4	1	1	2	0	0.0640978	0.915399	1.74126
SIRT3	3	4	1	0	3	0	0.0640978	0.915399	2.77259
SLC1A1	3	4	1	1	2	1	0.0640978	0.915399	1.04811
SLC6A5	3	4	0	0	4	2	0.0640978	0.915399	1.99574
SLITRK5	3	4	0	0	4	1	0.0640978	0.915399	3.04385
SRRT	3	4	1	0	3	1	0.0640978	0.915399	2.07944
TGOLN2	3	4	0	1	3	1	0.0640978	0.915399	2.07944
TSSK6	3	4	3	1	0	0	0.0640978	0.915399	0
WTIP	3	4	2	0	2	1	0.0640978	0.915399	1.04811
GON4L	65	30	2	2	26	20	0.0647869	0.915399	2.29882
LRRTM3	65	30	9	13	8	7	0.0647869	0.915399	0.726712
SORBS3	27	15	4	4	7	5	0.064911	0.915399	1.60669
USP48	89	39	1	1	37	27	0.0656048	0.915399	3.0707
BNC2	47	23	0	0	23	23	0.0658171	0.915399	0
COBLL1	32	17	0	0	17	8	0.0664212	0.915399	5.0876
CUEDC2	20	12	3	0	9	10	0.0665844	0.915399	-0.646333
MRPL34	20	12	5	5	2	0	0.0665844	0.915399	1.74126
NCRNA00167	20	12	6	6	0	0	0.0665844	0.915399	0
SUN1	20	12	7	5	0	1	0.0665844	0.915399	-0.693147
MED27	42	21	0	0	21	25	0.0666005	0.915399	-1.53019
ABL2	11	8	0	1	7	4	0.066763	0.915399	2.50133
ASPH	11	8	0	0	8	5	0.066763	0.915399	2.33341
CCT6B	11	8	1	1	6	4	0.066763	0.915399	1.72586
DCI	11	8	1	0	7	2	0.066763	0.915399	4.49707
FAM57A	11	8	2	0	6	4	0.066763	0.915399	1.72586
GPR173	11	8	0	1	7	0	0.066763	0.915399	6.23832
HIST2H2BE	11	8	3	5	0	0	0.066763	0.915399	0
HMBS	11	8	1	1	6	0	0.066763	0.915399	5.46286
IL1RAPL2	11	8	0	0	8	5	0.066763	0.915399	2.33341
NMNAT3	11	8	0	1	7	3	0.066763	0.915399	3.46574
P2RX5	11	8	1	0	7	3	0.066763	0.915399	3.46574
STK33	11	8	0	1	7	5	0.066763	0.915399	1.60669
SYNPO	11	8	2	4	2	2	0.066763	0.915399	0
ZNF74	11	8	2	2	4	5	0.066763	0.915399	-0.894632
LIMA1	37	19	9	5	5	11	0.0668754	0.915399	-4.27667
SOHLH2	37	19	0	0	19	14	0.0668754	0.915399	2.36728
AP1S1	9	7	0	0	7	4	0.0694355	0.915399	2.50133
ARPP19	9	7	1	0	6	2	0.0694355	0.915399	3.7216
C22orf24	9	7	0	1	6	4	0.0694355	0.915399	1.72586
CUL4A	9	7	1	0	6	1	0.0694355	0.915399	4.76971
GEN1	9	7	0	0	7	3	0.0694355	0.915399	3.46574
KLHL1	9	7	0	0	7	2	0.0694355	0.915399	4.49707
MEF2A	9	7	1	0	6	0	0.0694355	0.915399	5.46286
MRPS12	9	7	5	1	1	1	0.0694355	0.915399	0
RBBP7	9	7	2	3	2	2	0.0694355	0.915399	0
RGL1	9	7	0	0	7	2	0.0694355	0.915399	4.49707
RUSC1	9	7	1	5	1	3	0.0694355	0.915399	-2.07944
SENP1	9	7	0	2	5	0	0.0694355	0.915399	4.63163
SLFN11	9	7	0	1	6	2	0.0694355	0.915399	3.7216
ARMC5	5	5	1	0	4	1	0.069993	0.915399	3.04385
ARPC3	5	5	0	0	5	0	0.069993	0.915399	4.63163
AZIN1	5	5	2	1	2	2	0.069993	0.915399	0
BHLHE40	5	5	1	2	2	0	0.069993	0.915399	1.74126
C11orf10	5	5	0	0	5	0	0.069993	0.915399	4.63163
CAST	5	5	0	0	5	0	0.069993	0.915399	4.63163
CLPTM1L	5	5	1	1	3	2	0.069993	0.915399	1.03133
CMTM8	5	5	0	2	3	1	0.069993	0.915399	2.07944
CN5H6.4	5	5	1	4	0	0	0.069993	0.915399	0
FBXW8	5	5	0	0	5	0	0.069993	0.915399	4.63163
GLMN	5	5	1	1	3	3	0.069993	0.915399	0
GTPBP5	5	5	0	0	5	4	0.069993	0.915399	0.894632
IRF2BP1	5	5	4	1	0	0	0.069993	0.915399	0
KIAA0802	5	5	0	1	4	4	0.069993	0.915399	0
KIAA1529	5	5	0	1	4	1	0.069993	0.915399	3.04385
MAGI3	5	5	1	0	4	3	0.069993	0.915399	0.96441
MAMDC2	5	5	0	0	5	6	0.069993	0.915399	-0.831229
MEPCE	5	5	3	2	0	0	0.069993	0.915399	0
MTMR9L	5	5	3	2	0	1	0.069993	0.915399	-0.693147
NPTX1	5	5	0	2	3	1	0.069993	0.915399	2.07944
PRKCZ	5	5	1	0	4	1	0.069993	0.915399	3.04385
PTP4A1	5	5	1	1	3	3	0.069993	0.915399	0
PUS10	5	5	1	0	4	2	0.069993	0.915399	1.99574
RAD51AP1	5	5	0	0	5	4	0.069993	0.915399	0.894632
RASA3	5	5	0	0	5	3	0.069993	0.915399	1.85904
ROCK1	5	5	0	1	4	1	0.069993	0.915399	3.04385
RYBP	5	5	0	0	5	2	0.069993	0.915399	2.89037
SHMT2	5	5	0	2	3	1	0.069993	0.915399	2.07944
SLC4A1AP	5	5	3	1	1	1	0.069993	0.915399	0
STAP2	5	5	0	0	5	3	0.069993	0.915399	1.85904
TERT	5	5	3	2	0	2	0.069993	0.915399	-1.74126
TMEM115	5	5	2	2	1	0	0.069993	0.915399	0.693147
TMEM186	5	5	1	0	4	2	0.069993	0.915399	1.99574
UBL4A	5	5	1	4	0	1	0.069993	0.915399	-0.693147
WHAMM	5	5	2	3	0	2	0.069993	0.915399	-1.74126
ZNF639	5	5	1	0	4	4	0.069993	0.915399	0
FAM126A	25	14	0	0	14	9	0.0702294	0.915399	2.93103
HDDC3	25	14	3	4	7	1	0.0702294	0.915399	5.54518
MAGIX	25	14	7	7	0	5	0.0702294	0.915399	-4.63163
SATB2	25	14	1	2	11	11	0.0702294	0.915399	0
ZNF668	25	14	7	3	4	3	0.0702294	0.915399	0.96441
RAB8B	106	45	1	2	42	27	0.0707695	0.915399	4.39018
C15orf52	7	6	2	0	4	3	0.0709123	0.915399	0.96441
C17orf59	7	6	3	3	0	0	0.0709123	0.915399	0
C6orf108	7	6	0	0	6	7	0.0709123	0.915399	-0.775464
EIF4A2	7	6	0	2	4	6	0.0709123	0.915399	-1.72586
HCG11	7	6	1	5	0	0	0.0709123	0.915399	0
ITFG2	7	6	0	1	5	2	0.0709123	0.915399	2.89037
NR1D2	7	6	0	0	6	2	0.0709123	0.915399	3.7216
NUCKS1	7	6	0	2	4	1	0.0709123	0.915399	3.04385
PPP5C	7	6	1	0	5	3	0.0709123	0.915399	1.85904
PYCR1	7	6	2	2	2	0	0.0709123	0.915399	1.74126
QRICH1	7	6	2	2	2	4	0.0709123	0.915399	-1.99574
SHANK3	7	6	2	2	2	1	0.0709123	0.915399	1.04811
SLC27A1	7	6	0	0	6	2	0.0709123	0.915399	3.7216
TXNDC17	7	6	2	2	2	1	0.0709123	0.915399	1.04811
ZNF638	7	6	0	0	6	4	0.0709123	0.915399	1.72586
ERCC6	45	22	4	2	16	14	0.0712672	0.91892	1.0006
MYO1C	30	16	0	0	16	13	0.0719888	0.92609	1.53283
TMEM87A	30	16	1	2	13	12	0.0719888	0.92609	0.556387
RHBDD3	35	18	6	4	8	14	0.072501	0.931609	-3.61502
LHFP	66	30	0	0	30	30	0.0730475	0.937555	0
DNMBP	93	40	0	0	40	35	0.0748476	0.950236	1.36913
DPPA4	23	13	1	0	12	5	0.0760197	0.950236	4.85981
F11R	23	13	0	0	13	5	0.0760197	0.950236	5.4162
AIMP2	16	10	0	1	9	4	0.0769934	0.950236	3.91202
ARHGDIA	16	10	3	2	5	7	0.0769934	0.950236	-1.60669
CLEC6A	16	10	0	0	10	9	0.0769934	0.950236	0.646333
HBQ1	16	10	6	2	2	0	0.0769934	0.950236	1.74126
MMP16	16	10	1	0	9	6	0.0769934	0.950236	2.18616
ZNF80	16	10	7	3	0	0	0.0769934	0.950236	0
C8orf45	43	21	0	0	21	12	0.0772223	0.950236	4.29285
DDX17	28	15	0	4	11	6	0.0780848	0.950236	3.44544
NAV2	28	15	0	0	15	16	0.0780848	0.950236	-0.490299
GIGYF2	38	19	0	0	19	7	0.0782697	0.950236	6.70901
RPL27A	38	19	5	13	1	10	0.0782697	0.950236	-7.60221
PDS5B	33	17	6	6	5	6	0.0786653	0.950236	-0.831229
YDJC	33	17	9	3	5	4	0.0786653	0.950236	0.894632
FKBP10	21	12	2	3	7	5	0.0823254	0.950236	1.60669
PRH1	21	12	0	0	12	9	0.0823254	0.950236	1.84242
PRR4	21	12	0	0	12	9	0.0823254	0.950236	1.84242
ZNF236	21	12	4	1	7	7	0.0823254	0.950236	0
HNMT	14	9	1	2	6	1	0.0826066	0.950236	4.76971
IGF2BP3	14	9	0	0	9	4	0.0826066	0.950236	3.91202
JMY	14	9	2	2	5	7	0.0826066	0.950236	-1.60669
KCNN1	14	9	2	0	7	9	0.0826066	0.950236	-1.4107
MDH2	14	9	0	0	9	4	0.0826066	0.950236	3.91202
NAGLU	14	9	3	5	1	0	0.0826066	0.950236	0.693147
RBM26	14	9	2	0	7	2	0.0826066	0.950236	4.49707
SERPINF1	14	9	0	0	9	10	0.0826066	0.950236	-0.646333
SULF1	14	9	1	0	8	8	0.0826066	0.950236	0
PRR11	105	44	0	0	44	38	0.0829763	0.950236	1.54223
ADNP	41	20	0	1	19	13	0.0837384	0.950236	2.89951
SMARCA2	78	34	0	2	32	20	0.0846141	0.950236	4.26525
C7orf40	26	14	5	1	8	1	0.0847703	0.950236	6.27189
CEP250	26	14	2	1	11	6	0.0847703	0.950236	3.44544
NCAPH	26	14	0	0	14	8	0.0847703	0.950236	3.61502
PAN2	26	14	2	6	6	4	0.0847703	0.950236	1.72586
FBXO17	36	18	0	0	18	15	0.0849556	0.950236	1.41741
TXNDC15	36	18	5	6	7	11	0.0849556	0.950236	-2.66997
MAP4K3	221	85	5	1	79	58	0.0883276	0.950236	3.71616
TNS3	92	39	0	0	39	35	0.0883784	0.950236	1.10543
C8orf40	12	8	1	1	6	2	0.0883802	0.950236	3.7216
CRLF1	12	8	1	4	3	8	0.0883802	0.950236	-4.19245
GAA	12	8	0	1	7	4	0.0883802	0.950236	2.50133
GPATCH4	12	8	0	0	8	7	0.0883802	0.950236	0.726712
MYCBP2	12	8	1	0	7	4	0.0883802	0.950236	2.50133
OLA1	12	8	0	0	8	1	0.0883802	0.950236	6.27189
RNASEK	12	8	1	2	5	2	0.0883802	0.950236	2.89037
SNRNP35	12	8	1	1	6	5	0.0883802	0.950236	0.831229
TBX1	12	8	0	0	8	2	0.0883802	0.950236	5.22378
CPA6	65	29	0	0	29	32	0.0884222	0.950236	-0.948459
NCRNA00188	65	29	5	4	20	24	0.0884222	0.950236	-1.57549
ZNF536	44	21	0	1	20	14	0.0889208	0.950236	2.79245
FAM109B	19	11	8	3	0	0	0.0891918	0.950236	0
ITCH	19	11	0	0	11	10	0.0891918	0.950236	0.612942
SFXN2	19	11	0	0	11	5	0.0891918	0.950236	4.27667
SH3BP2	76	33	13	17	3	4	0.090981	0.950236	-0.96441
ANKRD11	52	24	0	1	23	20	0.0909894	0.950236	1.19875
DAG1	24	13	0	1	12	2	0.0921161	0.950236	7.75018
DTNB	34	17	0	1	16	5	0.0922994	0.950236	6.94902
GNAS	29	15	0	0	15	16	0.0928753	0.950236	-0.490299
ZNF114	29	15	1	1	13	6	0.0928753	0.950236	4.58497
ADAR	10	7	0	0	7	6	0.0941145	0.950236	0.775464
ARMC6	10	7	0	0	7	3	0.0941145	0.950236	3.46574
BRCA2	10	7	0	0	7	0	0.0941145	0.950236	6.23832
C5orf42	10	7	0	0	7	1	0.0941145	0.950236	5.54518
C9orf95	10	7	3	1	3	3	0.0941145	0.950236	0
CLSPN	10	7	0	0	7	7	0.0941145	0.950236	0
ETNK1	10	7	1	1	5	7	0.0941145	0.950236	-1.60669
FAM120A	10	7	2	0	5	6	0.0941145	0.950236	-0.831229
FYCO1	10	7	0	0	7	4	0.0941145	0.950236	2.50133
INPP4A	10	7	0	0	7	3	0.0941145	0.950236	3.46574
KIAA0652	10	7	0	3	4	1	0.0941145	0.950236	3.04385
LONRF1	10	7	0	1	6	5	0.0941145	0.950236	0.831229
NDUFS1	10	7	0	1	6	0	0.0941145	0.950236	5.46286
PRSS36	10	7	1	2	4	3	0.0941145	0.950236	0.96441
TM9SF1	10	7	3	3	1	0	0.0941145	0.950236	0.693147
TRIM16	10	7	1	0	6	4	0.0941145	0.950236	1.72586
ZNF592	10	7	0	0	7	5	0.0941145	0.950236	1.60669
ADAMTSL4	2	3	1	2	0	1	0.0960613	0.950236	-0.693147
ADRBK1	2	3	1	0	2	6	0.0960613	0.950236	-3.7216
AKD1	2	3	0	0	3	0	0.0960613	0.950236	2.77259
AMZ2	2	3	2	0	1	0	0.0960613	0.950236	0.693147
APC2	2	3	1	2	0	1	0.0960613	0.950236	-0.693147
ARRB1	2	3	0	0	3	3	0.0960613	0.950236	0
BDP1	2	3	1	2	0	1	0.0960613	0.950236	-0.693147
BSDC1	2	3	1	0	2	3	0.0960613	0.950236	-1.03133
C10orf91	2	3	0	2	1	0	0.0960613	0.950236	0.693147
C2orf71	2	3	1	0	2	0	0.0960613	0.950236	1.74126
C3orf47	2	3	2	1	0	0	0.0960613	0.950236	0
C4orf41	2	3	0	0	3	3	0.0960613	0.950236	0
C6orf162	2	3	0	1	2	1	0.0960613	0.950236	1.04811
C8orf77	2	3	2	1	0	0	0.0960613	0.950236	0
C9orf114	2	3	0	1	2	2	0.0960613	0.950236	0
CARNS1	2	3	1	1	1	1	0.0960613	0.950236	0
CCDC12	2	3	0	0	3	1	0.0960613	0.950236	2.07944
COG7	2	3	0	1	2	1	0.0960613	0.950236	1.04811
COL28A1	2	3	0	0	3	0	0.0960613	0.950236	2.77259
COPB2	2	3	0	0	3	0	0.0960613	0.950236	2.77259
COX19	2	3	0	1	2	2	0.0960613	0.950236	0
CYP51A1	2	3	0	0	3	1	0.0960613	0.950236	2.07944
DNAJC25	2	3	0	0	3	1	0.0960613	0.950236	2.07944
DNM2	2	3	1	0	2	0	0.0960613	0.950236	1.74126
DSTYK	2	3	1	0	2	2	0.0960613	0.950236	0
EIF6	2	3	1	0	2	3	0.0960613	0.950236	-1.03133
FAM149A	2	3	0	0	3	0	0.0960613	0.950236	2.77259
FLOT1	2	3	0	2	1	2	0.0960613	0.950236	-1.04811
FOXD3	2	3	2	1	0	0	0.0960613	0.950236	0
GAK	2	3	1	0	2	0	0.0960613	0.950236	1.74126
GLB1	2	3	0	1	2	0	0.0960613	0.950236	1.74126
GPR137C	2	3	1	1	1	1	0.0960613	0.950236	0
HIF1A	2	3	2	1	0	0	0.0960613	0.950236	0
IFT80	2	3	0	1	2	2	0.0960613	0.950236	0
ING1	2	3	0	0	3	0	0.0960613	0.950236	2.77259
JUND	2	3	0	3	0	0	0.0960613	0.950236	0
KCNJ14	2	3	0	1	2	1	0.0960613	0.950236	1.04811
KCNQ4	2	3	0	0	3	0	0.0960613	0.950236	2.77259
KIAA0754	2	3	2	1	0	0	0.0960613	0.950236	0
KRR1	2	3	0	0	3	1	0.0960613	0.950236	2.07944
LAMA4	2	3	0	1	2	0	0.0960613	0.950236	1.74126
LOC143666	2	3	1	2	0	0	0.0960613	0.950236	0
LOC652276	2	3	1	1	1	1	0.0960613	0.950236	0
LOC729991-MEF2B	2	3	1	0	2	0	0.0960613	0.950236	1.74126
LRRC23	2	3	0	2	1	1	0.0960613	0.950236	0
LXN	2	3	0	1	2	1	0.0960613	0.950236	1.04811
LYRM2	2	3	0	1	2	1	0.0960613	0.950236	1.04811
MAP2K2	2	3	0	0	3	0	0.0960613	0.950236	2.77259
MATN2	2	3	0	0	3	1	0.0960613	0.950236	2.07944
MEX3C	2	3	0	0	3	2	0.0960613	0.950236	1.03133
MEX3D	2	3	0	0	3	1	0.0960613	0.950236	2.07944
MGC42105	2	3	0	1	2	1	0.0960613	0.950236	1.04811
MRPL55	2	3	0	0	3	1	0.0960613	0.950236	2.07944
MRPS11	2	3	1	0	2	1	0.0960613	0.950236	1.04811
NANS	2	3	0	0	3	0	0.0960613	0.950236	2.77259
NARF	2	3	1	0	2	2	0.0960613	0.950236	0
NFE2L3	2	3	1	0	2	0	0.0960613	0.950236	1.74126
NKX6-1	2	3	1	0	2	2	0.0960613	0.950236	0
PEX1	2	3	0	1	2	1	0.0960613	0.950236	1.04811
PKN1	2	3	0	0	3	4	0.0960613	0.950236	-0.96441
PLOD1	2	3	0	0	3	4	0.0960613	0.950236	-0.96441
PPM1L	2	3	0	0	3	0	0.0960613	0.950236	2.77259
RBM17	2	3	1	2	0	2	0.0960613	0.950236	-1.74126
RNF115	2	3	0	0	3	4	0.0960613	0.950236	-0.96441
RNF40	2	3	2	1	0	4	0.0960613	0.950236	-3.737
SHKBP1	2	3	0	1	2	3	0.0960613	0.950236	-1.03133
SIK1	2	3	1	0	2	0	0.0960613	0.950236	1.74126
SLC38A7	2	3	0	0	3	0	0.0960613	0.950236	2.77259
SLC4A9	2	3	0	1	2	3	0.0960613	0.950236	-1.03133
SMOC2	2	3	0	2	1	0	0.0960613	0.950236	0.693147
SP110	2	3	0	0	3	3	0.0960613	0.950236	0
STK16	2	3	1	0	2	1	0.0960613	0.950236	1.04811
STRA13	2	3	0	0	3	2	0.0960613	0.950236	1.03133
STX12	2	3	1	0	2	0	0.0960613	0.950236	1.74126
SYT6	2	3	0	0	3	4	0.0960613	0.950236	-0.96441
TAF4	2	3	1	0	2	0	0.0960613	0.950236	1.74126
TEX101	2	3	0	2	1	1	0.0960613	0.950236	0
TSPAN9	2	3	0	0	3	0	0.0960613	0.950236	2.77259
USP21	2	3	0	1	2	3	0.0960613	0.950236	-1.03133
VWA3A	2	3	0	0	3	1	0.0960613	0.950236	2.07944
VWF	2	3	0	1	2	0	0.0960613	0.950236	1.74126
ZC3HAV1L	2	3	1	1	1	1	0.0960613	0.950236	0
ZFP1	2	3	0	1	2	2	0.0960613	0.950236	0
ZNF182	2	3	1	0	2	0	0.0960613	0.950236	1.74126
ZNF552	2	3	0	2	1	0	0.0960613	0.950236	0.693147
MAN2A1	42	20	0	2	18	12	0.0964586	0.950236	3.01632
PIP4K2A	42	20	2	0	18	12	0.0964586	0.950236	3.01632
AVEN	17	10	0	0	10	4	0.0966635	0.950236	4.55836
BTBD1	17	10	2	1	7	6	0.0966635	0.950236	0.775464
C18orf55	17	10	5	3	2	2	0.0966635	0.950236	0
PLOD2	17	10	0	0	10	0	0.0966635	0.950236	8.29535
PRMT8	17	10	1	0	9	5	0.0966635	0.950236	3.01739
XKR6	17	10	0	2	8	9	0.0966635	0.950236	-0.683985
GCLC	74	32	0	0	32	13	0.0978473	0.950236	7.58993
C14orf43	50	23	0	2	21	15	0.0984881	0.950236	2.69394
FERMT1	66	29	1	1	27	20	0.0988074	0.950236	2.64658
AGXT2L2	8	6	0	0	6	8	0.0994038	0.950236	-1.50218
ALDH16A1	8	6	0	0	6	0	0.0994038	0.950236	5.46286
BLOC1S1	8	6	1	0	5	0	0.0994038	0.950236	4.63163
C10orf25	8	6	1	2	3	1	0.0994038	0.950236	2.07944
C6orf47	8	6	2	4	0	0	0.0994038	0.950236	0
C9orf139	8	6	0	2	4	2	0.0994038	0.950236	1.99574
CELSR3	8	6	0	6	0	3	0.0994038	0.950236	-2.77259
CHAC2	8	6	0	0	6	1	0.0994038	0.950236	4.76971
FRMD4A	8	6	0	0	6	3	0.0994038	0.950236	2.69027
GFPT2	8	6	0	0	6	3	0.0994038	0.950236	2.69027
LOC100130557	8	6	3	3	0	0	0.0994038	0.950236	0
PHB2	8	6	2	3	1	0	0.0994038	0.950236	0.693147
PPIL5	8	6	2	1	3	2	0.0994038	0.950236	1.03133
PRDX5	8	6	0	1	5	1	0.0994038	0.950236	3.93848
PRDXDD1P	8	6	4	2	0	0	0.0994038	0.950236	0
RBM3	8	6	1	2	3	3	0.0994038	0.950236	0
RDH11	8	6	1	0	5	2	0.0994038	0.950236	2.89037
RGS9BP	8	6	5	1	0	0	0.0994038	0.950236	0
SFRS2	8	6	5	1	0	0	0.0994038	0.950236	0
TMEM11	8	6	2	0	4	1	0.0994038	0.950236	3.04385
TMEM150C	8	6	1	0	5	3	0.0994038	0.950236	1.85904
TTC17	8	6	0	0	6	2	0.0994038	0.950236	3.7216
ZC3H8	8	6	0	0	6	2	0.0994038	0.950236	3.7216
ARSB	22	12	2	6	4	8	0.100204	0.950236	-3.22804
PARP9	22	12	7	0	5	4	0.100204	0.950236	0.894632
PACS2	27	14	5	6	3	0	0.101082	0.950236	2.77259
SNX16	45	21	0	2	19	9	0.101716	0.950236	5.29832
ACSF3	6	5	0	0	5	0	0.103389	0.950236	4.63163
ALOXE3	6	5	2	1	2	0	0.103389	0.950236	1.74126
C1orf190	6	5	0	0	5	5	0.103389	0.950236	0
C4orf38	6	5	2	3	0	0	0.103389	0.950236	0
CD3EAP	6	5	0	2	3	2	0.103389	0.950236	1.03133
CSGALNACT1	6	5	0	0	5	3	0.103389	0.950236	1.85904
DNAJC25-GNG10	6	5	0	0	5	4	0.103389	0.950236	0.894632
DZIP1	6	5	1	0	4	3	0.103389	0.950236	0.96441
FIG4	6	5	0	1	4	2	0.103389	0.950236	1.99574
GPR124	6	5	0	1	4	3	0.103389	0.950236	0.96441
HRSP12	6	5	1	0	4	2	0.103389	0.950236	1.99574
IRAK1BP1	6	5	1	3	1	2	0.103389	0.950236	-1.04811
KCTD11	6	5	4	1	0	0	0.103389	0.950236	0
LOC150197	6	5	1	4	0	0	0.103389	0.950236	0
LOC80054	6	5	4	1	0	0	0.103389	0.950236	0
LSM3	6	5	0	0	5	0	0.103389	0.950236	4.63163
LSS	6	5	1	0	4	3	0.103389	0.950236	0.96441
MAML1	6	5	2	2	1	2	0.103389	0.950236	-1.04811
MRPS23	6	5	0	1	4	4	0.103389	0.950236	0
PHF13	6	5	0	0	5	2	0.103389	0.950236	2.89037
PHF21B	6	5	0	0	5	4	0.103389	0.950236	0.894632
PPT2	6	5	1	0	4	1	0.103389	0.950236	3.04385
PRKAG1	6	5	0	0	5	5	0.103389	0.950236	0
PSMC2	6	5	0	0	5	1	0.103389	0.950236	3.93848
RNF13	6	5	0	1	4	1	0.103389	0.950236	3.04385
RPL15	6	5	0	0	5	0	0.103389	0.950236	4.63163
S100A4	6	5	1	3	1	1	0.103389	0.950236	0
SLC10A3	6	5	2	1	2	1	0.103389	0.950236	1.04811
SNX15	6	5	3	1	1	3	0.103389	0.950236	-2.07944
THRAP3	6	5	0	0	5	1	0.103389	0.950236	3.93848
TMEM56	6	5	0	0	5	2	0.103389	0.950236	2.89037
TRIM41	6	5	3	2	0	0	0.103389	0.950236	0
TRIP13	6	5	0	0	5	4	0.103389	0.950236	0.894632
ZNF317	6	5	0	1	4	2	0.103389	0.950236	1.99574
ACAT2	4	4	0	0	4	2	0.10408	0.950236	1.99574
ALG12	4	4	1	0	3	0	0.10408	0.950236	2.77259
ANXA11	4	4	0	0	4	2	0.10408	0.950236	1.99574
ARL2BP	4	4	1	1	2	2	0.10408	0.950236	0
ATRIP	4	4	0	1	3	1	0.10408	0.950236	2.07944
C11orf68	4	4	0	1	3	0	0.10408	0.950236	2.77259
C11orf71	4	4	2	0	2	1	0.10408	0.950236	1.04811
C12orf41	4	4	1	2	1	1	0.10408	0.950236	0
C12orf5	4	4	0	0	4	6	0.10408	0.950236	-1.72586
C4orf10	4	4	3	1	0	0	0.10408	0.950236	0
CAP1	4	4	0	0	4	3	0.10408	0.950236	0.96441
CHCHD2	4	4	0	0	4	1	0.10408	0.950236	3.04385
DLG4	4	4	0	2	2	3	0.10408	0.950236	-1.03133
DNAJC30	4	4	3	1	0	0	0.10408	0.950236	0
DONSON	4	4	2	0	2	2	0.10408	0.950236	0
EPN3	4	4	3	1	0	1	0.10408	0.950236	-0.693147
FAM124B	4	4	2	1	1	0	0.10408	0.950236	0.693147
FANCF	4	4	0	4	0	0	0.10408	0.950236	0
FKRP	4	4	0	0	4	4	0.10408	0.950236	0
FUCA2	4	4	0	0	4	1	0.10408	0.950236	3.04385
FXC1	4	4	0	1	3	0	0.10408	0.950236	2.77259
GLIPR1L2	4	4	1	0	3	2	0.10408	0.950236	1.03133
GOPC	4	4	1	1	2	1	0.10408	0.950236	1.04811
HIVEP2	4	4	0	0	4	5	0.10408	0.950236	-0.894632
INTS5	4	4	1	1	2	4	0.10408	0.950236	-1.99574
KIAA0495	4	4	1	2	1	0	0.10408	0.950236	0.693147
MAPK12	4	4	0	1	3	2	0.10408	0.950236	1.03133
MED29	4	4	1	2	1	1	0.10408	0.950236	0
MID2	4	4	1	0	3	1	0.10408	0.950236	2.07944
MTF1	4	4	0	2	2	3	0.10408	0.950236	-1.03133
MTMR7	4	4	0	0	4	0	0.10408	0.950236	3.737
NOL8	4	4	1	0	3	5	0.10408	0.950236	-1.85904
NUDT8	4	4	4	0	0	4	0.10408	0.950236	-3.737
OSGEP	4	4	1	1	2	2	0.10408	0.950236	0
PAFAH1B2	4	4	0	0	4	3	0.10408	0.950236	0.96441
PASK	4	4	0	0	4	1	0.10408	0.950236	3.04385
PLCD3	4	4	0	0	4	2	0.10408	0.950236	1.99574
POLR1D	4	4	0	0	4	5	0.10408	0.950236	-0.894632
PRDX4	4	4	0	0	4	3	0.10408	0.950236	0.96441
RAG1AP1	4	4	1	1	2	3	0.10408	0.950236	-1.03133
RAVER2	4	4	0	0	4	0	0.10408	0.950236	3.737
RFXAP	4	4	1	1	2	2	0.10408	0.950236	0
SEC61A2	4	4	2	0	2	0	0.10408	0.950236	1.74126
SLC35E3	4	4	2	1	1	0	0.10408	0.950236	0.693147
TBX3	4	4	1	1	2	1	0.10408	0.950236	1.04811
TRIM13	4	4	0	2	2	2	0.10408	0.950236	0
TRMT12	4	4	2	2	0	0	0.10408	0.950236	0
UFSP1	4	4	3	1	0	0	0.10408	0.950236	0
UNC13A	4	4	0	2	2	1	0.10408	0.950236	1.04811
WRNIP1	4	4	1	1	2	2	0.10408	0.950236	0
ZC3H7A	4	4	1	0	3	1	0.10408	0.950236	2.07944
ATL3	15	9	4	0	5	5	0.10478	0.950236	0
BAG4	15	9	1	1	7	5	0.10478	0.950236	1.60669
C14orf128	15	9	4	5	0	0	0.10478	0.950236	0
C19orf23	15	9	2	4	3	7	0.10478	0.950236	-3.46574
METTL7A	15	9	1	2	6	4	0.10478	0.950236	1.72586
CDK2AP1	94	39	5	1	33	40	0.106243	0.950236	-1.95543
LOC100128191	20	11	5	6	0	1	0.109129	0.950236	-0.693147
MIR548H2	20	11	0	0	11	6	0.109129	0.950236	3.44544
RPRD1B	20	11	1	2	8	6	0.109129	0.950236	1.50218
IFT172	30	15	6	1	8	10	0.109301	0.950236	-1.33032
LATS1	30	15	0	0	15	8	0.109301	0.950236	4.12532
NKAIN2	30	15	0	0	15	12	0.109301	0.950236	1.59891
FGGY	25	13	1	0	12	9	0.110154	0.950236	1.84242
RAD51C	43	20	3	3	14	7	0.110346	0.950236	4.34173
NKAIN3	89	37	0	0	37	37	0.111296	0.950236	0
TCF7L1	51	23	1	0	22	19	0.11135	0.950236	1.23626
CTNNA1	182	70	0	1	69	63	0.112033	0.950236	1.08693
FAM35A	13	8	0	0	8	9	0.113562	0.950236	-0.683985
FAM65A	13	8	0	0	8	4	0.113562	0.950236	3.22804
GABPB2	13	8	1	3	4	5	0.113562	0.950236	-0.894632
PLAUR	13	8	1	4	3	7	0.113562	0.950236	-3.46574
PTPRE	13	8	0	0	8	3	0.113562	0.950236	4.19245
SLC19A1	13	8	0	0	8	3	0.113562	0.950236	4.19245
TOPORS	13	8	0	0	8	5	0.113562	0.950236	2.33341
TUT1	13	8	2	0	6	5	0.113562	0.950236	0.831229
ZNF711	13	8	0	1	7	2	0.113562	0.950236	4.49707
CSK	38	18	0	1	17	4	0.113803	0.950236	8.31563
LRRC40	81	34	0	0	34	32	0.113962	0.950236	0.598624
SLC22A15	106	43	1	0	42	25	0.114768	0.950236	5.09478
LOC100129066	123	49	0	0	49	53	0.116539	0.950236	-0.877259
PACS1	33	16	1	0	15	15	0.116849	0.950236	0
S100PBP	33	16	0	0	16	17	0.116849	0.950236	-0.471979
ZFX	33	16	1	0	15	5	0.116849	0.950236	6.45872
CREB3L4	18	10	2	4	4	2	0.119005	0.950236	1.99574
IRAK1	18	10	5	3	2	3	0.119005	0.950236	-1.03133
KIAA0182	18	10	0	0	10	9	0.119005	0.950236	0.646333
MLL2	18	10	6	4	0	0	0.119005	0.950236	0
XKR3	18	10	0	2	8	3	0.119005	0.950236	4.19245
BBX	28	14	0	0	14	10	0.119167	0.950236	2.2847
CSAD	28	14	2	2	10	8	0.119167	0.950236	1.33032
ESR1	28	14	0	0	14	6	0.119167	0.950236	5.1172
PRR5-ARHGAP8	28	14	0	0	14	6	0.119167	0.950236	5.1172
RRAGD	28	14	0	0	14	8	0.119167	0.950236	3.61502
ZCCHC11	28	14	0	1	13	5	0.119167	0.950236	5.4162
ATP9B	41	19	0	0	19	17	0.119809	0.950236	0.894706
LPIN2	41	19	5	9	5	6	0.119809	0.950236	-0.831229
RUNX2	41	19	0	0	19	5	0.119809	0.950236	8.31571
SMG6	23	12	0	1	11	15	0.120216	0.950236	-2.18206
NHSL1	132	52	0	2	50	38	0.121296	0.950236	2.93959
APEX1	11	7	3	2	2	1	0.122994	0.950236	1.04811
CNPY2	11	7	2	1	4	2	0.122994	0.950236	1.99574
DYNC1LI1	11	7	1	0	6	2	0.122994	0.950236	3.7216
EEF1DP3	11	7	0	0	7	4	0.122994	0.950236	2.50133
GPR19	11	7	1	1	5	2	0.122994	0.950236	2.89037
NRARP	11	7	2	5	0	0	0.122994	0.950236	0
ORAI1	11	7	0	0	7	8	0.122994	0.950236	-0.726712
RFX7	11	7	0	1	6	3	0.122994	0.950236	2.69027
SDCCAG3	11	7	0	2	5	3	0.122994	0.950236	1.85904
SELV	11	7	0	0	7	5	0.122994	0.950236	1.60669
FBXW4	36	17	1	3	13	4	0.123795	0.950236	6.31083
SDK2	36	17	0	0	17	11	0.123795	0.950236	3.14434
WDFY3	44	20	1	0	19	10	0.125402	0.950236	4.65198
RORA	397	143	0	0	143	108	0.127163	0.950236	3.88128
TTC8	63	27	4	1	22	10	0.127642	0.950236	5.88825
FGFR2	85	35	1	2	32	23	0.127669	0.950236	3.0665
FAM172A	99	40	0	1	39	30	0.12851	0.950236	2.6193
NPAS3	55	24	0	0	24	27	0.129582	0.950236	-1.07109
BCL3	16	9	0	0	9	5	0.129964	0.950236	3.01739
C11orf20	16	9	1	4	4	3	0.129964	0.950236	0.96441
CCDC18	16	9	0	0	9	8	0.129964	0.950236	0.683985
ICA1L	16	9	0	0	9	2	0.129964	0.950236	5.90776
KIAA1524	16	9	0	0	9	7	0.129964	0.950236	1.4107
KITLG	16	9	0	0	9	5	0.129964	0.950236	3.01739
NFE2L1	16	9	1	0	8	8	0.129964	0.950236	0
NR1H3	16	9	2	2	5	4	0.129964	0.950236	0.894632
SDF4	16	9	0	0	9	13	0.129964	0.950236	-2.39881
AHCY	26	13	0	0	13	13	0.130117	0.950236	0
FEZ2	26	13	1	0	12	11	0.130117	0.950236	0.583143
FSTL3	26	13	7	4	2	1	0.130117	0.950236	1.04811
PRTFDC1	26	13	2	0	11	12	0.130117	0.950236	-0.583143
GNL3L	47	21	11	7	3	8	0.13062	0.950236	-4.19245
FAM189A1	21	11	0	0	11	8	0.131415	0.950236	1.94326
NRN1	21	11	1	2	8	3	0.131415	0.950236	4.19245
WDR74	21	11	1	0	10	5	0.131415	0.950236	3.66372
ADORA2B	9	6	0	1	5	6	0.132963	0.950236	-0.831229
APITD1	9	6	1	2	3	0	0.132963	0.950236	2.77259
B3GNTL1	9	6	2	1	3	2	0.132963	0.950236	1.03133
BANK1	9	6	0	0	6	2	0.132963	0.950236	3.7216
BTBD19	9	6	1	3	2	1	0.132963	0.950236	1.04811
C18orf34	9	6	2	1	3	3	0.132963	0.950236	0
C6orf132	9	6	2	1	3	2	0.132963	0.950236	1.03133
CCT4	9	6	0	1	5	5	0.132963	0.950236	0
CLIP3	9	6	5	1	0	0	0.132963	0.950236	0
CRIM1	9	6	0	0	6	2	0.132963	0.950236	3.7216
DDX56	9	6	0	3	3	3	0.132963	0.950236	0
FRAT1	9	6	3	3	0	0	0.132963	0.950236	0
IL27RA	9	6	1	1	4	3	0.132963	0.950236	0.96441
KIAA1109	9	6	1	0	5	2	0.132963	0.950236	2.89037
KLF13	9	6	0	1	5	8	0.132963	0.950236	-2.33341
MRPS21	9	6	3	2	1	0	0.132963	0.950236	0.693147
SLC4A5	9	6	0	0	6	5	0.132963	0.950236	0.831229
SOCS2	9	6	0	0	6	1	0.132963	0.950236	4.76971
SRRM3	9	6	0	0	6	3	0.132963	0.950236	2.69027
STOX1	9	6	0	0	6	2	0.132963	0.950236	3.7216
SYDE1	9	6	0	0	6	0	0.132963	0.950236	5.46286
TCEA1	9	6	0	0	6	4	0.132963	0.950236	1.72586
TRIM38	9	6	2	0	4	6	0.132963	0.950236	-1.72586
TYRO3	9	6	0	0	6	6	0.132963	0.950236	0
ZNF581	9	6	1	0	5	0	0.132963	0.950236	4.63163
FAM96A	34	16	1	2	13	10	0.134818	0.950236	1.75247
LOC100129716	61	26	2	5	19	11	0.137587	0.950236	4.03904
LIMCH1	171	65	2	1	62	52	0.137702	0.950236	2.02316
ARRDC3	72	30	0	2	28	28	0.137765	0.950236	0
EML2	29	14	5	1	8	10	0.139	0.950236	-1.33032
TRIM71	53	23	1	0	22	12	0.140059	0.950236	4.69216
ATF7IP	45	20	0	0	20	10	0.141616	0.950236	5.07715
ATG10	45	20	1	0	19	17	0.141616	0.950236	0.894706
GLI3	45	20	0	0	20	12	0.141616	0.950236	3.88107
ACYP2	37	17	0	2	15	14	0.14164	0.950236	0.510299
IQGAP1	37	17	0	0	17	10	0.14164	0.950236	3.75728
C7orf68	14	8	1	1	6	5	0.142164	0.950236	0.831229
DGUOK	14	8	0	0	8	4	0.142164	0.950236	3.22804
FAM117B	14	8	1	3	4	3	0.142164	0.950236	0.96441
HOXB4	14	8	3	4	1	1	0.142164	0.950236	0
IFNGR2	14	8	2	3	3	1	0.142164	0.950236	2.07944
KLHL12	14	8	0	0	8	3	0.142164	0.950236	4.19245
LDB3	14	8	0	0	8	8	0.142164	0.950236	0
MAN2C1	14	8	1	1	6	4	0.142164	0.950236	1.72586
NPVF	14	8	3	1	4	2	0.142164	0.950236	1.99574
PHF19	14	8	1	0	7	5	0.142164	0.950236	1.60669
STRN4	14	8	2	1	5	11	0.142164	0.950236	-4.27667
VPS24	14	8	0	0	8	4	0.142164	0.950236	3.22804
VWCE	14	8	1	0	7	5	0.142164	0.950236	1.60669
BAT2	24	12	0	0	12	6	0.142314	0.950236	4.02858
CYB5D2	24	12	0	3	9	6	0.142314	0.950236	2.18616
IFT74	24	12	0	0	12	6	0.142314	0.950236	4.02858
PGPEP1	24	12	5	6	1	0	0.142314	0.950236	0.693147
WWP2	24	12	0	0	12	9	0.142314	0.950236	1.84242
ADAM17	7	5	0	0	5	4	0.143125	0.950236	0.894632
AFMID	7	5	0	1	4	7	0.143125	0.950236	-2.50133
AGL	7	5	2	3	0	3	0.143125	0.950236	-2.77259
AGRP	7	5	1	3	1	2	0.143125	0.950236	-1.04811
APPL1	7	5	0	1	4	1	0.143125	0.950236	3.04385
APRT	7	5	0	1	4	1	0.143125	0.950236	3.04385
ARNT2	7	5	0	0	5	0	0.143125	0.950236	4.63163
ATF5	7	5	2	2	1	2	0.143125	0.950236	-1.04811
B9D1	7	5	0	0	5	3	0.143125	0.950236	1.85904
C12orf11	7	5	3	1	1	1	0.143125	0.950236	0
C17orf97	7	5	1	1	3	4	0.143125	0.950236	-0.96441
C2orf67	7	5	0	0	5	1	0.143125	0.950236	3.93848
CDS2	7	5	0	0	5	1	0.143125	0.950236	3.93848
CNTROB	7	5	2	3	0	1	0.143125	0.950236	-0.693147
CPXM1	7	5	1	1	3	1	0.143125	0.950236	2.07944
DCAF16	7	5	2	0	3	1	0.143125	0.950236	2.07944
DUSP2	7	5	1	2	2	1	0.143125	0.950236	1.04811
ESR2	7	5	2	0	3	0	0.143125	0.950236	2.77259
EZH2	7	5	0	0	5	3	0.143125	0.950236	1.85904
FAM5C	7	5	0	0	5	4	0.143125	0.950236	0.894632
FAM81A	7	5	0	0	5	4	0.143125	0.950236	0.894632
GIPR	7	5	1	0	4	5	0.143125	0.950236	-0.894632
INPPL1	7	5	0	1	4	2	0.143125	0.950236	1.99574
KL	7	5	0	1	4	2	0.143125	0.950236	1.99574
LMNB2	7	5	2	3	0	0	0.143125	0.950236	0
LOC202781	7	5	2	3	0	0	0.143125	0.950236	0
LOC400657	7	5	2	3	0	0	0.143125	0.950236	0
MGC2752	7	5	0	0	5	1	0.143125	0.950236	3.93848
NUP214	7	5	1	0	4	0	0.143125	0.950236	3.737
PLEKHA4	7	5	3	1	1	1	0.143125	0.950236	0
POLRMT	7	5	0	0	5	3	0.143125	0.950236	1.85904
PXK	7	5	0	1	4	2	0.143125	0.950236	1.99574
RALGDS	7	5	0	0	5	5	0.143125	0.950236	0
RAP1A	7	5	0	0	5	4	0.143125	0.950236	0.894632
RNF34	7	5	0	0	5	4	0.143125	0.950236	0.894632
SERTAD1	7	5	0	0	5	5	0.143125	0.950236	0
SLC25A43	7	5	0	1	4	3	0.143125	0.950236	0.96441
SLC34A1	7	5	1	3	1	1	0.143125	0.950236	0
TADA3	7	5	2	0	3	2	0.143125	0.950236	1.03133
TRPM8	7	5	0	1	4	3	0.143125	0.950236	0.96441
TTBK1	7	5	1	0	4	4	0.143125	0.950236	0
UBE2O	7	5	2	0	3	4	0.143125	0.950236	-0.96441
YWHAH	7	5	0	0	5	4	0.143125	0.950236	0.894632
ZNF628	7	5	1	2	2	3	0.143125	0.950236	-1.03133
ZNF846	7	5	0	1	4	0	0.143125	0.950236	3.737
FADS2	19	10	2	1	7	5	0.143935	0.950236	1.60669
FLAD1	19	10	7	2	1	2	0.143935	0.950236	-1.04811
NRM	19	10	2	3	5	10	0.143935	0.950236	-3.66372
PARP11	19	10	7	1	2	3	0.143935	0.950236	-1.03133
TDRD3	19	10	0	1	9	3	0.143935	0.950236	4.87643
BRD2	92	37	5	4	28	25	0.144167	0.950236	1.04377
SDCCAG8	81	33	0	0	33	29	0.146466	0.950236	1.25092
TBC1D23	48	21	0	0	21	17	0.146715	0.950236	1.73166
YARS	32	15	4	1	10	11	0.147007	0.950236	-0.612942
INO80C	40	18	0	1	17	19	0.147898	0.950236	-0.894706
TBX5	40	18	1	1	16	13	0.147898	0.950236	1.53283
AAMP	1	2	1	0	1	0	0.14822	0.950236	0.693147
ABCD2	1	2	0	0	2	0	0.14822	0.950236	1.74126
ACAD8	1	2	0	0	2	0	0.14822	0.950236	1.74126
ACOT12	1	2	0	0	2	0	0.14822	0.950236	1.74126
ACTR10	1	2	0	0	2	0	0.14822	0.950236	1.74126
AP1M1	1	2	0	0	2	0	0.14822	0.950236	1.74126
AP3S1	1	2	0	0	2	2	0.14822	0.950236	0
AQP10	1	2	2	0	0	0	0.14822	0.950236	0
ASB13	1	2	0	0	2	1	0.14822	0.950236	1.04811
ATG4B	1	2	0	0	2	2	0.14822	0.950236	0
ATP1B4	1	2	0	0	2	0	0.14822	0.950236	1.74126
AURKA	1	2	0	0	2	1	0.14822	0.950236	1.04811
BCL8	1	2	0	0	2	0	0.14822	0.950236	1.74126
BCL9L	1	2	2	0	0	1	0.14822	0.950236	-0.693147
BNIP3	1	2	0	0	2	0	0.14822	0.950236	1.74126
C11orf64	1	2	1	0	1	0	0.14822	0.950236	0.693147
C11orf67	1	2	0	0	2	0	0.14822	0.950236	1.74126
C12orf64	1	2	0	0	2	0	0.14822	0.950236	1.74126
C14orf179	1	2	0	0	2	1	0.14822	0.950236	1.04811
C17orf39	1	2	0	0	2	1	0.14822	0.950236	1.04811
C17orf61	1	2	0	2	0	0	0.14822	0.950236	0
C1orf74	1	2	0	0	2	1	0.14822	0.950236	1.04811
C6orf226	1	2	1	1	0	0	0.14822	0.950236	0
CACNB3	1	2	1	0	1	0	0.14822	0.950236	0.693147
CAMK2G	1	2	0	2	0	0	0.14822	0.950236	0
CCNG1	1	2	0	1	1	2	0.14822	0.950236	-1.04811
CD83	1	2	0	0	2	2	0.14822	0.950236	0
CDC20	1	2	0	0	2	0	0.14822	0.950236	1.74126
CDH19	1	2	0	0	2	3	0.14822	0.950236	-1.03133
CDK15	1	2	0	0	2	2	0.14822	0.950236	0
CDK16	1	2	0	0	2	0	0.14822	0.950236	1.74126
CIB1	1	2	1	0	1	2	0.14822	0.950236	-1.04811
COL15A1	1	2	1	1	0	0	0.14822	0.950236	0
COL23A1	1	2	0	0	2	1	0.14822	0.950236	1.04811
COMMD5	1	2	0	0	2	0	0.14822	0.950236	1.74126
CREB3	1	2	0	2	0	0	0.14822	0.950236	0
CRELD1	1	2	1	0	1	0	0.14822	0.950236	0.693147
DBI	1	2	1	1	0	0	0.14822	0.950236	0
DDX60	1	2	0	0	2	2	0.14822	0.950236	0
DHX16	1	2	0	1	1	3	0.14822	0.950236	-2.07944
DNTT	1	2	0	0	2	2	0.14822	0.950236	0
DNTTIP1	1	2	0	0	2	1	0.14822	0.950236	1.04811
DOLPP1	1	2	0	0	2	0	0.14822	0.950236	1.74126
DPH2	1	2	0	1	1	2	0.14822	0.950236	-1.04811
DUOXA2	1	2	1	1	0	0	0.14822	0.950236	0
EFCAB4A	1	2	1	0	1	0	0.14822	0.950236	0.693147
EFNA4	1	2	0	0	2	2	0.14822	0.950236	0
ELP2	1	2	0	0	2	1	0.14822	0.950236	1.04811
EMCN	1	2	0	0	2	0	0.14822	0.950236	1.74126
ETFDH	1	2	0	0	2	2	0.14822	0.950236	0
ETNK2	1	2	1	0	1	0	0.14822	0.950236	0.693147
EVI2A	1	2	1	0	1	0	0.14822	0.950236	0.693147
FAM83C	1	2	1	1	0	0	0.14822	0.950236	0
FBXO24	1	2	0	0	2	2	0.14822	0.950236	0
FLJ32063	1	2	2	0	0	0	0.14822	0.950236	0
FUBP3	1	2	0	0	2	0	0.14822	0.950236	1.74126
FZD1	1	2	1	1	0	0	0.14822	0.950236	0
GALNT12	1	2	0	0	2	0	0.14822	0.950236	1.74126
GHR	1	2	0	0	2	1	0.14822	0.950236	1.04811
GJA3	1	2	1	0	1	0	0.14822	0.950236	0.693147
GOLGA8B	1	2	0	0	2	0	0.14822	0.950236	1.74126
GPR144	1	2	0	1	1	0	0.14822	0.950236	0.693147
GPR156	1	2	0	0	2	1	0.14822	0.950236	1.04811
GRB14	1	2	0	0	2	0	0.14822	0.950236	1.74126
GRIA4	1	2	0	0	2	1	0.14822	0.950236	1.04811
HDAC10	1	2	0	1	1	1	0.14822	0.950236	0
HIST1H4D	1	2	2	0	0	0	0.14822	0.950236	0
HLX	1	2	1	0	1	2	0.14822	0.950236	-1.04811
HRC	1	2	1	0	1	1	0.14822	0.950236	0
HRK	1	2	0	0	2	0	0.14822	0.950236	1.74126
HSPB3	1	2	1	1	0	0	0.14822	0.950236	0
IARS2	1	2	0	0	2	1	0.14822	0.950236	1.04811
IDUA	1	2	0	1	1	0	0.14822	0.950236	0.693147
IGF1	1	2	0	1	1	0	0.14822	0.950236	0.693147
IL13RA1	1	2	0	0	2	1	0.14822	0.950236	1.04811
IRS2	1	2	0	0	2	0	0.14822	0.950236	1.74126
ITGB6	1	2	0	0	2	0	0.14822	0.950236	1.74126
KANK2	1	2	0	0	2	0	0.14822	0.950236	1.74126
KLF2	1	2	0	0	2	0	0.14822	0.950236	1.74126
LHFPL4	1	2	0	0	2	1	0.14822	0.950236	1.04811
LMX1A	1	2	0	1	1	0	0.14822	0.950236	0.693147
LOC100188949	1	2	0	1	1	0	0.14822	0.950236	0.693147
LOC282997	1	2	2	0	0	0	0.14822	0.950236	0
LOC644145	1	2	0	0	2	0	0.14822	0.950236	1.74126
LPPR1	1	2	0	0	2	0	0.14822	0.950236	1.74126
LSM14B	1	2	1	0	1	1	0.14822	0.950236	0
LTC4S	1	2	2	0	0	0	0.14822	0.950236	0
MAN2A2	1	2	1	0	1	0	0.14822	0.950236	0.693147
MAP1LC3B	1	2	0	0	2	2	0.14822	0.950236	0
MCOLN1	1	2	0	0	2	0	0.14822	0.950236	1.74126
MED11	1	2	0	0	2	0	0.14822	0.950236	1.74126
MED6	1	2	0	0	2	1	0.14822	0.950236	1.04811
MIR591	1	2	2	0	0	0	0.14822	0.950236	0
MLF1	1	2	0	0	2	1	0.14822	0.950236	1.04811
MMRN2	1	2	0	0	2	1	0.14822	0.950236	1.04811
MYST1	1	2	0	0	2	0	0.14822	0.950236	1.74126
NAT9	1	2	1	0	1	1	0.14822	0.950236	0
NDUFA1	1	2	0	0	2	0	0.14822	0.950236	1.74126
NUDT16	1	2	2	0	0	0	0.14822	0.950236	0
NUDT7	1	2	0	0	2	1	0.14822	0.950236	1.04811
NUPR1	1	2	0	1	1	0	0.14822	0.950236	0.693147
ODF2	1	2	0	0	2	0	0.14822	0.950236	1.74126
OLFM3	1	2	0	0	2	0	0.14822	0.950236	1.74126
OTUD3	1	2	0	0	2	1	0.14822	0.950236	1.04811
PAK6	1	2	0	0	2	1	0.14822	0.950236	1.04811
PARD6A	1	2	1	1	0	2	0.14822	0.950236	-1.74126
PIM3	1	2	0	2	0	0	0.14822	0.950236	0
PLXNA3	1	2	0	0	2	0	0.14822	0.950236	1.74126
POLB	1	2	1	0	1	0	0.14822	0.950236	0.693147
PPEF2	1	2	1	0	1	0	0.14822	0.950236	0.693147
PPIF	1	2	1	0	1	2	0.14822	0.950236	-1.04811
PPIL6	1	2	0	0	2	2	0.14822	0.950236	0
PPM1M	1	2	0	1	1	0	0.14822	0.950236	0.693147
PSMD2	1	2	0	1	1	0	0.14822	0.950236	0.693147
RAB11FIP1	1	2	0	2	0	0	0.14822	0.950236	0
RAB1B	1	2	0	0	2	1	0.14822	0.950236	1.04811
RAB38	1	2	1	0	1	0	0.14822	0.950236	0.693147
RASL11A	1	2	1	0	1	1	0.14822	0.950236	0
RASSF2	1	2	0	0	2	1	0.14822	0.950236	1.04811
RNF128	1	2	0	0	2	0	0.14822	0.950236	1.74126
RNF208	1	2	1	1	0	0	0.14822	0.950236	0
RNF216L	1	2	0	0	2	1	0.14822	0.950236	1.04811
RPS6KA3	1	2	0	0	2	1	0.14822	0.950236	1.04811
SCRT1	1	2	2	0	0	0	0.14822	0.950236	0
SDF2	1	2	0	1	1	1	0.14822	0.950236	0
SDHA	1	2	0	0	2	1	0.14822	0.950236	1.04811
SDHAF1	1	2	0	2	0	0	0.14822	0.950236	0
SEC23A	1	2	0	0	2	1	0.14822	0.950236	1.04811
SELO	1	2	0	1	1	1	0.14822	0.950236	0
SF1	1	2	1	0	1	0	0.14822	0.950236	0.693147
SFRS13B	1	2	1	1	0	1	0.14822	0.950236	-0.693147
SHCBP1	1	2	1	0	1	0	0.14822	0.950236	0.693147
SLC16A3	1	2	0	0	2	0	0.14822	0.950236	1.74126
SLC25A5	1	2	0	0	2	0	0.14822	0.950236	1.74126
SLC2A3	1	2	0	1	1	0	0.14822	0.950236	0.693147
SLC9A10	1	2	0	0	2	0	0.14822	0.950236	1.74126
SMPD4	1	2	2	0	0	0	0.14822	0.950236	0
SMTNL2	1	2	1	0	1	1	0.14822	0.950236	0
SNORD24	1	2	1	1	0	0	0.14822	0.950236	0
SNORD25	1	2	1	1	0	0	0.14822	0.950236	0
SNORD60	1	2	0	2	0	0	0.14822	0.950236	0
SPATA2	1	2	0	0	2	1	0.14822	0.950236	1.04811
STX7	1	2	0	0	2	1	0.14822	0.950236	1.04811
STYXL1	1	2	0	0	2	1	0.14822	0.950236	1.04811
SUB1	1	2	0	0	2	4	0.14822	0.950236	-1.99574
SYTL3	1	2	0	0	2	1	0.14822	0.950236	1.04811
TEKT2	1	2	1	1	0	0	0.14822	0.950236	0
TFIP11	1	2	0	0	2	0	0.14822	0.950236	1.74126
TMEM120B	1	2	0	0	2	1	0.14822	0.950236	1.04811
TMEM59L	1	2	0	0	2	1	0.14822	0.950236	1.04811
TOMM70A	1	2	0	0	2	0	0.14822	0.950236	1.74126
TRAPPC4	1	2	1	0	1	0	0.14822	0.950236	0.693147
TREX1	1	2	0	2	0	0	0.14822	0.950236	0
TSPAN31	1	2	1	0	1	0	0.14822	0.950236	0.693147
TUBB4	1	2	0	0	2	0	0.14822	0.950236	1.74126
UCHL3	1	2	1	0	1	0	0.14822	0.950236	0.693147
UPF1	1	2	0	2	0	1	0.14822	0.950236	-0.693147
ZC3H12A	1	2	0	0	2	2	0.14822	0.950236	0
ZNF221	1	2	1	0	1	1	0.14822	0.950236	0
ZNF24	1	2	0	0	2	0	0.14822	0.950236	1.74126
ZNF738	1	2	1	0	1	1	0.14822	0.950236	0
ZNF8	1	2	0	0	2	0	0.14822	0.950236	1.74126
CTBP2	27	13	1	1	11	11	0.151951	0.950236	0
FAM63A	27	13	1	2	10	10	0.151951	0.950236	0
FILIP1L	27	13	0	0	13	4	0.151951	0.950236	6.31083
KIAA1217	27	13	0	0	13	18	0.151951	0.950236	-2.45994
LTBP2	27	13	0	0	13	3	0.151951	0.950236	7.27524
MARCH3	27	13	1	0	12	12	0.151951	0.950236	0
PGBD3	27	13	3	2	8	11	0.151951	0.950236	-1.94326
PKNOX1	27	13	0	0	13	11	0.151951	0.950236	1.13953
BSG	62	26	2	5	19	17	0.152133	0.950236	0.894706
AASDHPPT	5	4	0	0	4	3	0.15252	0.950236	0.96441
ABTB2	5	4	0	0	4	1	0.15252	0.950236	3.04385
ANKRD16	5	4	1	1	2	1	0.15252	0.950236	1.04811
ANKRD27	5	4	0	0	4	2	0.15252	0.950236	1.99574
AP1M2	5	4	2	0	2	0	0.15252	0.950236	1.74126
ATP6V0E2	5	4	2	2	0	0	0.15252	0.950236	0
BOP1	5	4	0	0	4	1	0.15252	0.950236	3.04385
BTBD12	5	4	2	0	2	2	0.15252	0.950236	0
C7orf47	5	4	1	1	2	1	0.15252	0.950236	1.04811
CBY3	5	4	3	1	0	1	0.15252	0.950236	-0.693147
CRYBG3	5	4	0	1	3	2	0.15252	0.950236	1.03133
CTH	5	4	0	0	4	4	0.15252	0.950236	0
CYP4V2	5	4	1	0	3	1	0.15252	0.950236	2.07944
DHX40	5	4	1	2	1	0	0.15252	0.950236	0.693147
EEPD1	5	4	1	0	3	0	0.15252	0.950236	2.77259
EPRS	5	4	0	1	3	2	0.15252	0.950236	1.03133
FAM149B1	5	4	0	0	4	3	0.15252	0.950236	0.96441
FAM19A1	5	4	0	0	4	0	0.15252	0.950236	3.737
FKBP14	5	4	0	2	2	1	0.15252	0.950236	1.04811
GIT2	5	4	0	0	4	2	0.15252	0.950236	1.99574
GSTZ1	5	4	1	0	3	2	0.15252	0.950236	1.03133
HAUS3	5	4	0	2	2	2	0.15252	0.950236	0
IFI30	5	4	0	0	4	0	0.15252	0.950236	3.737
KIAA0892	5	4	0	1	3	1	0.15252	0.950236	2.07944
KIAA1804	5	4	1	0	3	1	0.15252	0.950236	2.07944
LMF1	5	4	0	0	4	7	0.15252	0.950236	-2.50133
MDM1	5	4	0	1	3	1	0.15252	0.950236	2.07944
MFSD3	5	4	0	3	1	0	0.15252	0.950236	0.693147
MPP2	5	4	0	0	4	1	0.15252	0.950236	3.04385
MXRA7	5	4	0	0	4	2	0.15252	0.950236	1.99574
NMI	5	4	1	0	3	1	0.15252	0.950236	2.07944
NPM3	5	4	2	0	2	1	0.15252	0.950236	1.04811
PARP4	5	4	0	0	4	0	0.15252	0.950236	3.737
PDCD6IP	5	4	0	0	4	4	0.15252	0.950236	0
PEX2	5	4	0	1	3	1	0.15252	0.950236	2.07944
PPP1CC	5	4	1	0	3	2	0.15252	0.950236	1.03133
PRKAA2	5	4	0	0	4	0	0.15252	0.950236	3.737
RALGAPB	5	4	1	0	3	3	0.15252	0.950236	0
RBM12B	5	4	1	0	3	5	0.15252	0.950236	-1.85904
RBM7	5	4	0	0	4	1	0.15252	0.950236	3.04385
RNF167	5	4	1	1	2	0	0.15252	0.950236	1.74126
RNF19A	5	4	0	0	4	1	0.15252	0.950236	3.04385
SEC61A1	5	4	1	0	3	1	0.15252	0.950236	2.07944
SFN	5	4	2	2	0	0	0.15252	0.950236	0
SS18L1	5	4	2	1	1	0	0.15252	0.950236	0.693147
STK19	5	4	0	1	3	2	0.15252	0.950236	1.03133
STK35	5	4	1	1	2	0	0.15252	0.950236	1.74126
TFG	5	4	0	1	3	0	0.15252	0.950236	2.77259
TMCO6	5	4	0	0	4	3	0.15252	0.950236	0.96441
TMEM85	5	4	1	0	3	0	0.15252	0.950236	2.77259
TPBG	5	4	2	2	0	1	0.15252	0.950236	-0.693147
TSPAN14	5	4	0	0	4	1	0.15252	0.950236	3.04385
TTC37	5	4	0	0	4	1	0.15252	0.950236	3.04385
VCAN	5	4	1	0	3	0	0.15252	0.950236	2.77259
XPC	5	4	1	1	2	4	0.15252	0.950236	-1.99574
ZIC2	5	4	2	1	1	0	0.15252	0.950236	0.693147
ARHGAP21	35	16	0	0	16	13	0.154255	0.950236	1.53283
TANC2	866	298	0	1	297	278	0.154896	0.950236	1.07672
NEGR1	127	49	0	1	48	55	0.155345	0.950236	-1.5252
C8orf58	12	7	5	2	0	1	0.155796	0.950236	-0.693147
CDC14B	12	7	0	1	6	6	0.155796	0.950236	0
CTDSP1	12	7	1	2	4	1	0.155796	0.950236	3.04385
DLL3	12	7	2	5	0	2	0.155796	0.950236	-1.74126
IGFBP2	12	7	0	0	7	9	0.155796	0.950236	-1.4107
ITPKC	12	7	2	1	4	3	0.155796	0.950236	0.96441
KIAA0664	12	7	0	0	7	5	0.155796	0.950236	1.60669
NUP210	12	7	0	1	6	5	0.155796	0.950236	0.831229
SIK2	12	7	0	1	6	3	0.155796	0.950236	2.69027
SKP2	12	7	2	2	3	9	0.155796	0.950236	-4.87643
SON	12	7	0	0	7	5	0.155796	0.950236	1.60669
SOX2	12	7	4	3	0	0	0.155796	0.950236	0
THOP1	12	7	2	0	5	2	0.155796	0.950236	2.89037
WIZ	12	7	0	0	7	8	0.155796	0.950236	-0.726712
GUCA1A	54	23	1	1	21	15	0.155885	0.950236	2.69394
DYNC2H1	22	11	0	2	9	7	0.155959	0.950236	1.4107
LRRC45	22	11	4	1	6	6	0.155959	0.950236	0
SPATS2L	22	11	1	1	9	5	0.155959	0.950236	3.01739
CDKN2C	17	9	4	4	1	2	0.158007	0.950236	-1.04811
FAM55C	17	9	2	1	6	2	0.158007	0.950236	3.7216
IP6K1	17	9	3	2	4	2	0.158007	0.950236	1.99574
KIAA1949	17	9	3	2	4	3	0.158007	0.950236	0.96441
KIF23	17	9	0	2	7	4	0.158007	0.950236	2.50133
NADK	17	9	0	0	9	3	0.158007	0.950236	4.87643
SLC35D2	17	9	1	0	8	5	0.158007	0.950236	2.33341
TGFBR2	17	9	1	0	8	5	0.158007	0.950236	2.33341
TMEM97	17	9	0	1	8	6	0.158007	0.950236	1.50218
VPS28	17	9	0	1	8	8	0.158007	0.950236	0
ABCC8	3	3	1	0	2	0	0.158198	0.950236	1.74126
ACP1	3	3	0	0	3	2	0.158198	0.950236	1.03133
ADCY3	3	3	1	1	1	1	0.158198	0.950236	0
ADO	3	3	1	2	0	0	0.158198	0.950236	0
AKR7A2	3	3	0	0	3	1	0.158198	0.950236	2.07944
ANAPC2	3	3	0	2	1	0	0.158198	0.950236	0.693147
ANKRD10	3	3	0	0	3	2	0.158198	0.950236	1.03133
BZW2	3	3	0	0	3	2	0.158198	0.950236	1.03133
C12orf48	3	3	0	0	3	6	0.158198	0.950236	-2.69027
C19orf61	3	3	0	1	2	1	0.158198	0.950236	1.04811
C1orf109	3	3	0	1	2	0	0.158198	0.950236	1.74126
C20orf186	3	3	0	0	3	3	0.158198	0.950236	0
C20orf27	3	3	0	0	3	1	0.158198	0.950236	2.07944
C9orf25	3	3	0	0	3	0	0.158198	0.950236	2.77259
CCBP2	3	3	0	0	3	0	0.158198	0.950236	2.77259
CCNB2	3	3	0	1	2	0	0.158198	0.950236	1.74126
COX4NB	3	3	1	1	1	1	0.158198	0.950236	0
CSRNP1	3	3	0	0	3	2	0.158198	0.950236	1.03133
CYP20A1	3	3	1	1	1	1	0.158198	0.950236	0
CYP26B1	3	3	0	0	3	1	0.158198	0.950236	2.07944
DCAF4	3	3	0	0	3	0	0.158198	0.950236	2.77259
DFFB	3	3	0	1	2	0	0.158198	0.950236	1.74126
DGCR2	3	3	0	0	3	1	0.158198	0.950236	2.07944
DHRS7	3	3	1	0	2	2	0.158198	0.950236	0
EID2	3	3	2	1	0	0	0.158198	0.950236	0
EMP2	3	3	0	0	3	2	0.158198	0.950236	1.03133
EPS8L2	3	3	3	0	0	0	0.158198	0.950236	0
FAM115A	3	3	0	0	3	2	0.158198	0.950236	1.03133
FITM2	3	3	1	0	2	0	0.158198	0.950236	1.74126
FNDC4	3	3	1	1	1	0	0.158198	0.950236	0.693147
FOXC1	3	3	1	2	0	0	0.158198	0.950236	0
GADD45B	3	3	0	2	1	1	0.158198	0.950236	0
GREM2	3	3	0	0	3	4	0.158198	0.950236	-0.96441
GSG2	3	3	1	2	0	0	0.158198	0.950236	0
GTF2B	3	3	0	0	3	1	0.158198	0.950236	2.07944
GUCY1A2	3	3	0	0	3	3	0.158198	0.950236	0
HEXA	3	3	0	1	2	1	0.158198	0.950236	1.04811
HIVEP3	3	3	0	0	3	4	0.158198	0.950236	-0.96441
KIAA1826	3	3	1	1	1	0	0.158198	0.950236	0.693147
KREMEN2	3	3	3	0	0	0	0.158198	0.950236	0
MAN1A1	3	3	0	0	3	2	0.158198	0.950236	1.03133
MAP2K7	3	3	0	0	3	0	0.158198	0.950236	2.77259
MPRIP	3	3	1	0	2	2	0.158198	0.950236	0
MTERFD2	3	3	0	0	3	3	0.158198	0.950236	0
MTMR11	3	3	0	2	1	1	0.158198	0.950236	0
NAGS	3	3	1	0	2	2	0.158198	0.950236	0
NUDCD1	3	3	0	2	1	3	0.158198	0.950236	-2.07944
ORC1L	3	3	0	0	3	1	0.158198	0.950236	2.07944
OST4	3	3	1	1	1	0	0.158198	0.950236	0.693147
PABPC1L	3	3	0	0	3	1	0.158198	0.950236	2.07944
PCBP4	3	3	1	0	2	4	0.158198	0.950236	-1.99574
PCDHGA10	3	3	1	0	2	0	0.158198	0.950236	1.74126
PCDHGA9	3	3	0	0	3	0	0.158198	0.950236	2.77259
PCDHGB6	3	3	0	0	3	0	0.158198	0.950236	2.77259
PCNAAS	3	3	3	0	0	0	0.158198	0.950236	0
PDXP	3	3	1	0	2	1	0.158198	0.950236	1.04811
PFDN6	3	3	1	1	1	0	0.158198	0.950236	0.693147
PGLS	3	3	0	0	3	0	0.158198	0.950236	2.77259
PLXNB1	3	3	0	1	2	1	0.158198	0.950236	1.04811
PORCN	3	3	1	1	1	0	0.158198	0.950236	0.693147
PRDM5	3	3	1	0	2	1	0.158198	0.950236	1.04811
PRIMA1	3	3	0	0	3	2	0.158198	0.950236	1.03133
PRR15	3	3	1	0	2	0	0.158198	0.950236	1.74126
PSRC1	3	3	1	1	1	0	0.158198	0.950236	0.693147
PTENP1	3	3	1	2	0	0	0.158198	0.950236	0
PTOV1	3	3	0	0	3	3	0.158198	0.950236	0
SAP30BP	3	3	0	0	3	4	0.158198	0.950236	-0.96441
SFRP2	3	3	1	0	2	0	0.158198	0.950236	1.74126
SH2B1	3	3	3	0	0	0	0.158198	0.950236	0
SLC12A9	3	3	1	1	1	0	0.158198	0.950236	0.693147
SLC17A9	3	3	0	0	3	2	0.158198	0.950236	1.03133
SLC28A1	3	3	0	1	2	1	0.158198	0.950236	1.04811
SMPDL3B	3	3	1	1	1	0	0.158198	0.950236	0.693147
SNX18	3	3	0	0	3	1	0.158198	0.950236	2.07944
SRM	3	3	1	0	2	2	0.158198	0.950236	0
SRPRB	3	3	0	0	3	0	0.158198	0.950236	2.77259
SSH3	3	3	1	0	2	2	0.158198	0.950236	0
ST3GAL6	3	3	0	0	3	3	0.158198	0.950236	0
TAS2R39	3	3	0	3	0	0	0.158198	0.950236	0
TFDP1	3	3	0	0	3	5	0.158198	0.950236	-1.85904
TXNDC16	3	3	0	1	2	3	0.158198	0.950236	-1.03133
UBE4A	3	3	0	1	2	1	0.158198	0.950236	1.04811
UFSP2	3	3	0	0	3	4	0.158198	0.950236	-0.96441
USP39	3	3	0	0	3	1	0.158198	0.950236	2.07944
VPS11	3	3	1	0	2	3	0.158198	0.950236	-1.03133
YEATS4	3	3	0	1	2	2	0.158198	0.950236	0
YRDC	3	3	0	1	2	2	0.158198	0.950236	0
ZBTB11	3	3	1	1	1	3	0.158198	0.950236	-2.07944
ZFP62	3	3	0	0	3	0	0.158198	0.950236	2.77259
ZFPM2	3	3	0	0	3	0	0.158198	0.950236	2.77259
ZMYND12	3	3	2	0	1	1	0.158198	0.950236	0
ZNF260	3	3	0	1	2	3	0.158198	0.950236	-1.03133
ZNF789	3	3	1	1	1	3	0.158198	0.950236	-2.07944
SLC38A11	57	24	0	1	23	18	0.160019	0.950236	2.06349
PPHLN1	30	14	1	1	12	8	0.160525	0.950236	2.5264
DYNC1I1	38	17	0	0	17	17	0.160842	0.950236	0
KIAA0513	38	17	0	0	17	11	0.160842	0.950236	3.14434
SREBF1	38	17	0	2	15	11	0.160842	0.950236	2.18206
MACROD2	145	55	0	1	54	50	0.163453	0.950236	0.864847
PAWR	49	21	2	0	19	16	0.163876	0.950236	1.36669
UBE2Q2	88	35	0	1	34	30	0.164495	0.950236	1.22374
NXN	128	49	1	0	48	45	0.16612	0.950236	0.703704
BFSP1	25	12	0	0	12	11	0.166409	0.950236	0.583143
C17orf91	25	12	4	0	8	4	0.166409	0.950236	3.22804
CDC14A	25	12	2	0	10	5	0.166409	0.950236	3.66372
THAP2	25	12	2	2	8	2	0.166409	0.950236	5.22378
TNFRSF19	25	12	2	5	5	1	0.166409	0.950236	3.93848
ZNRF2	259	94	3	7	84	90	0.166576	0.950236	-0.881059
UACA	154	58	3	0	55	37	0.166923	0.950236	4.28686
NXPH1	63	26	0	0	26	26	0.167517	0.950236	0
PPP3CC	94	37	2	6	29	29	0.168988	0.950236	0
CBL	10	6	1	0	5	6	0.171079	0.950236	-0.831229
CDYL	10	6	0	0	6	4	0.171079	0.950236	1.72586
CLEC2A	10	6	0	0	6	5	0.171079	0.950236	0.831229
DCAF10	10	6	0	0	6	1	0.171079	0.950236	4.76971
GMPR2	10	6	4	2	0	2	0.171079	0.950236	-1.74126
GYS1	10	6	0	0	6	4	0.171079	0.950236	1.72586
MDP1	10	6	4	1	1	3	0.171079	0.950236	-2.07944
MEX3A	10	6	3	1	2	2	0.171079	0.950236	0
MUTYH	10	6	0	1	5	4	0.171079	0.950236	0.894632
PAPLN	10	6	0	0	6	1	0.171079	0.950236	4.76971
RRP1B	10	6	0	0	6	3	0.171079	0.950236	2.69027
SH3RF1	10	6	0	0	6	2	0.171079	0.950236	3.7216
SNRPC	10	6	3	2	1	2	0.171079	0.950236	-1.04811
SPATA16	10	6	0	0	6	7	0.171079	0.950236	-0.775464
TSPAN4	10	6	0	0	6	4	0.171079	0.950236	1.72586
UQCR10	10	6	1	1	4	3	0.171079	0.950236	0.96441
WDR70	10	6	0	0	6	7	0.171079	0.950236	-0.775464
ZNF747	10	6	1	1	4	3	0.171079	0.950236	0.96441
ADRA1A	20	10	1	0	9	8	0.171306	0.950236	0.683985
CUL1	20	10	0	0	10	7	0.171306	0.950236	2.05703
CUX2	20	10	0	0	10	8	0.171306	0.950236	1.33032
DENND2A	20	10	0	0	10	6	0.171306	0.950236	2.83249
NANP	20	10	0	0	10	4	0.171306	0.950236	4.55836
PTCH1	143	54	4	2	48	39	0.172673	0.950236	2.21949
BLMH	15	8	3	2	3	1	0.173929	0.950236	2.07944
BRD9	15	8	3	3	2	3	0.173929	0.950236	-1.03133
C6orf168	15	8	0	0	8	8	0.173929	0.950236	0
CCT3	15	8	0	1	7	5	0.173929	0.950236	1.60669
DBF4B	15	8	1	1	6	7	0.173929	0.950236	-0.775464
HMGCL	15	8	0	0	8	1	0.173929	0.950236	6.27189
INTS2	15	8	3	0	5	5	0.173929	0.950236	0
MCM5	15	8	0	1	7	4	0.173929	0.950236	2.50133
MMP25	15	8	2	5	1	1	0.173929	0.950236	0
MRPS34	15	8	4	3	1	0	0.173929	0.950236	0.693147
NFKBIL1	15	8	1	1	6	3	0.173929	0.950236	2.69027
PPP1R12A	15	8	0	0	8	5	0.173929	0.950236	2.33341
RASSF4	15	8	1	0	7	7	0.173929	0.950236	0
RSU1	15	8	4	0	4	5	0.173929	0.950236	-0.894632
SLC6A3	15	8	0	0	8	2	0.173929	0.950236	5.22378
SNHG7	15	8	3	0	5	2	0.173929	0.950236	2.89037
AP3B1	36	16	1	0	15	7	0.175104	0.950236	4.85203
MAGI1	28	13	1	1	11	7	0.175568	0.950236	2.66997
MLLT11	47	20	2	3	15	14	0.177411	0.950236	0.510299
ZC3H4	167	62	1	0	61	38	0.181023	0.950236	5.21037
AMOT	39	17	2	0	15	2	0.181347	0.950236	9.3491
EXOC6	50	21	0	0	21	25	0.182068	0.950236	-1.53019
TFCP2	23	11	1	5	5	4	0.182625	0.950236	0.894632
CALCR	31	14	1	1	12	16	0.183659	0.950236	-2.08921
DGKB	31	14	0	0	14	9	0.183659	0.950236	2.93103
RPL18A	31	14	0	1	13	17	0.183659	0.950236	-2.00481
RPL18AP3	31	14	0	1	13	17	0.183659	0.950236	-2.00481
C15orf17	53	22	4	4	14	10	0.18637	0.950236	2.2847
MIR548C	42	18	0	0	18	14	0.187014	0.950236	1.92771
ARL6IP1	8	5	0	1	4	1	0.188259	0.950236	3.04385
C22orf26	8	5	0	0	5	2	0.188259	0.950236	2.89037
CAND2	8	5	1	1	3	2	0.188259	0.950236	1.03133
CCDC85B	8	5	2	3	0	0	0.188259	0.950236	0
CLK4	8	5	0	0	5	2	0.188259	0.950236	2.89037
CLN3	8	5	2	1	2	2	0.188259	0.950236	0
CNIH	8	5	0	0	5	2	0.188259	0.950236	2.89037
DCK	8	5	0	0	5	1	0.188259	0.950236	3.93848
FAM84A	8	5	0	5	0	0	0.188259	0.950236	0
HNRNPH3	8	5	0	0	5	0	0.188259	0.950236	4.63163
IGSF21	8	5	0	0	5	1	0.188259	0.950236	3.93848
ITGA2B	8	5	2	1	2	1	0.188259	0.950236	1.04811
LOC100128822	8	5	3	2	0	0	0.188259	0.950236	0
LPAR4	8	5	0	1	4	2	0.188259	0.950236	1.99574
LPXN	8	5	0	0	5	4	0.188259	0.950236	0.894632
LRRC24	8	5	1	2	2	2	0.188259	0.950236	0
METTL4	8	5	0	0	5	2	0.188259	0.950236	2.89037
MRPL38	8	5	1	1	3	1	0.188259	0.950236	2.07944
NEDD4	8	5	0	0	5	1	0.188259	0.950236	3.93848
NUPL2	8	5	1	0	4	4	0.188259	0.950236	0
OSM	8	5	2	3	0	0	0.188259	0.950236	0
PPIA	8	5	0	0	5	1	0.188259	0.950236	3.93848
PSMD8	8	5	0	1	4	2	0.188259	0.950236	1.99574
RPL37A	8	5	0	0	5	5	0.188259	0.950236	0
RTN4IP1	8	5	1	0	4	0	0.188259	0.950236	3.737
SERF2	8	5	0	2	3	1	0.188259	0.950236	2.07944
SLC44A3	8	5	0	0	5	1	0.188259	0.950236	3.93848
SMCR8	8	5	3	2	0	0	0.188259	0.950236	0
SRI	8	5	0	0	5	6	0.188259	0.950236	-0.831229
TRUB1	8	5	0	0	5	1	0.188259	0.950236	3.93848
UTP18	8	5	0	0	5	4	0.188259	0.950236	0.894632
ZNF512	8	5	0	0	5	3	0.188259	0.950236	1.85904
ZNF562	8	5	0	0	5	1	0.188259	0.950236	3.93848
ACY1	18	9	1	0	8	4	0.188678	0.950236	3.22804
CLK3	18	9	1	5	3	2	0.188678	0.950236	1.03133
LCOR	18	9	5	0	4	2	0.188678	0.950236	1.99574
RPL7L1	18	9	0	1	8	7	0.188678	0.950236	0.726712
IRF8	34	15	2	0	13	9	0.190854	0.950236	2.39881
ALKBH2	13	7	2	1	4	4	0.192097	0.950236	0
ATP1B1	13	7	0	1	6	1	0.192097	0.950236	4.76971
C15orf34	13	7	3	4	0	0	0.192097	0.950236	0
CDH13	13	7	0	0	7	9	0.192097	0.950236	-1.4107
CIC	13	7	0	1	6	2	0.192097	0.950236	3.7216
DUSP9	13	7	1	0	6	1	0.192097	0.950236	4.76971
EFCAB4B	13	7	0	0	7	3	0.192097	0.950236	3.46574
EXOSC4	13	7	1	2	4	5	0.192097	0.950236	-0.894632
FANCA	13	7	2	1	4	2	0.192097	0.950236	1.99574
GCNT1	13	7	0	0	7	9	0.192097	0.950236	-1.4107
GUCY1A3	13	7	1	1	5	2	0.192097	0.950236	2.89037
MKL2	13	7	0	0	7	5	0.192097	0.950236	1.60669
MSL1	13	7	1	3	3	4	0.192097	0.950236	-0.96441
P4HA1	13	7	0	0	7	3	0.192097	0.950236	3.46574
PSPC1	13	7	1	3	3	1	0.192097	0.950236	2.07944
RB1CC1	13	7	0	0	7	1	0.192097	0.950236	5.54518
SETD2	13	7	0	1	6	6	0.192097	0.950236	0
SFRS12	13	7	2	2	3	3	0.192097	0.950236	0
SIX5	13	7	1	5	1	1	0.192097	0.950236	0
TGFBRAP1	13	7	0	0	7	0	0.192097	0.950236	6.23832
TNFSF11	13	7	0	0	7	2	0.192097	0.950236	4.49707
USP28	13	7	0	1	6	2	0.192097	0.950236	3.7216
MYO18A	45	19	0	0	19	17	0.192181	0.950236	0.894706
ASAP2	26	12	0	2	10	6	0.192372	0.950236	2.83249
DLG1	26	12	0	1	11	7	0.192372	0.950236	2.66997
GGPS1	26	12	2	1	9	8	0.192372	0.950236	0.683985
HOXB2	26	12	6	5	1	5	0.192372	0.950236	-3.93848
PABPN1	26	12	6	2	4	4	0.192372	0.950236	0
PHF8	26	12	2	2	8	4	0.192372	0.950236	3.22804
RILPL1	26	12	0	2	10	9	0.192372	0.950236	0.646333
SLC44A1	26	12	1	0	11	7	0.192372	0.950236	2.66997
ZRANB3	26	12	1	0	11	6	0.192372	0.950236	3.44544
C20orf72	73	29	5	5	19	14	0.192789	0.950236	2.36728
KIAA1598	48	20	0	3	17	18	0.196907	0.950236	-0.45513
MSH5	48	20	4	5	11	8	0.196907	0.950236	1.94326
SLC38A5	48	20	0	1	19	12	0.196907	0.950236	3.4559
ZNF219	48	20	5	1	14	21	0.196907	0.950236	-3.20424
SLC38A9	37	16	3	4	9	7	0.197292	0.950236	1.4107
IGF2BP1	62	25	3	7	15	20	0.197492	0.950236	-2.28215
MORF4L1	99	38	0	2	36	23	0.197895	0.950236	4.23965
NMNAT2	79	31	0	0	31	29	0.197968	0.950236	0.639376
IMPACT	29	13	1	0	12	7	0.200851	0.950236	3.25312
LARS2	29	13	0	0	13	11	0.200851	0.950236	1.13953
PI4K2B	29	13	1	1	11	6	0.200851	0.950236	3.44544
SPG21	29	13	1	1	11	8	0.200851	0.950236	1.94326
EMP3	21	10	0	0	10	4	0.200914	0.950236	4.55836
LOC100133315	21	10	0	0	10	8	0.200914	0.950236	1.33032
NR1D1	21	10	1	2	7	6	0.200914	0.950236	0.775464
POLDIP3	21	10	1	0	9	7	0.200914	0.950236	1.4107
SIAH1	21	10	1	1	8	4	0.200914	0.950236	3.22804
NDE1	51	21	2	1	18	9	0.201244	0.950236	4.85874
YWHAE	51	21	0	0	21	15	0.201244	0.950236	2.69394
ASH2L	40	17	3	2	12	2	0.203083	0.950236	7.75018
BCL2L1	40	17	5	1	11	7	0.203083	0.950236	2.66997
CDH6	40	17	0	0	17	10	0.203083	0.950236	3.75728
HPS4	40	17	3	3	11	10	0.203083	0.950236	0.612942
MSH3	40	17	1	0	16	19	0.203083	0.950236	-1.36669
WWC2	40	17	1	1	15	8	0.203083	0.950236	4.12532
TBC1D16	114	43	1	7	35	23	0.205895	0.950236	3.95527
ERBB4	71	28	0	0	28	29	0.206493	0.950236	-0.331044
CHD9	91	35	2	4	29	37	0.206687	0.950236	-2.40049
CSMD3	91	35	0	1	34	24	0.206687	0.950236	3.28839
ALS2	6	4	1	1	2	1	0.207538	0.950236	1.04811
ANKRD44	6	4	0	0	4	3	0.207538	0.950236	0.96441
AP1G1	6	4	1	0	3	2	0.207538	0.950236	1.03133
ATP6AP1	6	4	1	3	0	1	0.207538	0.950236	-0.693147
BACH1	6	4	2	0	2	5	0.207538	0.950236	-2.89037
BMP4	6	4	0	2	2	2	0.207538	0.950236	0
C11orf83	6	4	2	1	1	2	0.207538	0.950236	-1.04811
C14orf33	6	4	0	2	2	3	0.207538	0.950236	-1.03133
C3orf78	6	4	1	0	3	4	0.207538	0.950236	-0.96441
CAPRIN2	6	4	1	1	2	0	0.207538	0.950236	1.74126
CCDC40	6	4	1	2	1	3	0.207538	0.950236	-2.07944
CDC37	6	4	0	0	4	7	0.207538	0.950236	-2.50133
CEBPG	6	4	1	0	3	2	0.207538	0.950236	1.03133
CERKL	6	4	0	0	4	2	0.207538	0.950236	1.99574
CTSZ	6	4	2	0	2	2	0.207538	0.950236	0
CYTH3	6	4	0	1	3	3	0.207538	0.950236	0
DAPK1	6	4	0	1	3	5	0.207538	0.950236	-1.85904
DBNDD2	6	4	0	2	2	2	0.207538	0.950236	0
DCAF4L1	6	4	1	3	0	0	0.207538	0.950236	0
DDHD2	6	4	0	1	3	2	0.207538	0.950236	1.03133
DIS3L2	6	4	0	0	4	2	0.207538	0.950236	1.99574
DNM1P35	6	4	2	2	0	0	0.207538	0.950236	0
DOCK5	6	4	0	0	4	3	0.207538	0.950236	0.96441
DUSP15	6	4	0	1	3	0	0.207538	0.950236	2.77259
ENSA	6	4	0	0	4	0	0.207538	0.950236	3.737
EPM2A	6	4	0	0	4	3	0.207538	0.950236	0.96441
FBXO21	6	4	1	0	3	1	0.207538	0.950236	2.07944
FBXO45	6	4	0	1	3	1	0.207538	0.950236	2.07944
FKBPL	6	4	4	0	0	0	0.207538	0.950236	0
FLOT2	6	4	0	0	4	1	0.207538	0.950236	3.04385
FOXRED2	6	4	1	1	2	1	0.207538	0.950236	1.04811
GCET2	6	4	0	1	3	2	0.207538	0.950236	1.03133
GUF1	6	4	0	1	3	1	0.207538	0.950236	2.07944
GUSB	6	4	0	1	3	0	0.207538	0.950236	2.77259
HEATR6	6	4	1	1	2	1	0.207538	0.950236	1.04811
HGD	6	4	0	0	4	2	0.207538	0.950236	1.99574
IKBKAP	6	4	0	2	2	1	0.207538	0.950236	1.04811
ISY1	6	4	0	0	4	2	0.207538	0.950236	1.99574
KIAA0100	6	4	1	0	3	1	0.207538	0.950236	2.07944
LMAN2L	6	4	0	0	4	4	0.207538	0.950236	0
LZIC	6	4	1	3	0	3	0.207538	0.950236	-2.77259
MARVELD1	6	4	3	1	0	0	0.207538	0.950236	0
MAT2A	6	4	0	0	4	0	0.207538	0.950236	3.737
METTL10	6	4	0	0	4	2	0.207538	0.950236	1.99574
MGAT3	6	4	0	1	3	1	0.207538	0.950236	2.07944
MUDENG	6	4	2	0	2	2	0.207538	0.950236	0
NARFL	6	4	0	1	3	0	0.207538	0.950236	2.77259
NDRG3	6	4	0	0	4	2	0.207538	0.950236	1.99574
NIPA1	6	4	0	0	4	1	0.207538	0.950236	3.04385
PCBD2	6	4	0	0	4	0	0.207538	0.950236	3.737
PELO	6	4	1	2	1	0	0.207538	0.950236	0.693147
PEX13	6	4	0	0	4	5	0.207538	0.950236	-0.894632
PLOD3	6	4	2	0	2	2	0.207538	0.950236	0
POP7	6	4	1	0	3	2	0.207538	0.950236	1.03133
PTGR1	6	4	0	0	4	4	0.207538	0.950236	0
RBM25	6	4	0	1	3	1	0.207538	0.950236	2.07944
REXO4	6	4	0	0	4	4	0.207538	0.950236	0
RHOV	6	4	0	3	1	1	0.207538	0.950236	0
RNF114	6	4	1	0	3	1	0.207538	0.950236	2.07944
RPL8	6	4	1	1	2	0	0.207538	0.950236	1.74126
RSPO3	6	4	0	0	4	1	0.207538	0.950236	3.04385
SART3	6	4	1	0	3	1	0.207538	0.950236	2.07944
SLC39A14	6	4	0	1	3	3	0.207538	0.950236	0
SPTBN4	6	4	2	2	0	4	0.207538	0.950236	-3.737
SYNM	6	4	0	1	3	1	0.207538	0.950236	2.07944
TBXAS1	6	4	0	0	4	1	0.207538	0.950236	3.04385
TFB1M	6	4	0	0	4	3	0.207538	0.950236	0.96441
TGFB2	6	4	2	0	2	0	0.207538	0.950236	1.74126
TLN2	6	4	0	1	3	3	0.207538	0.950236	0
TM7SF2	6	4	0	1	3	2	0.207538	0.950236	1.03133
TMED10	6	4	0	0	4	2	0.207538	0.950236	1.99574
TNFSF13	6	4	1	3	0	0	0.207538	0.950236	0
TTYH1	6	4	0	0	4	2	0.207538	0.950236	1.99574
VPS4B	6	4	1	0	3	2	0.207538	0.950236	1.03133
WDR59	6	4	0	0	4	3	0.207538	0.950236	0.96441
KLRB1	32	14	0	1	13	10	0.208292	0.950236	1.75247
SGK3	32	14	0	0	14	13	0.208292	0.950236	0.532228
ABCB9	16	8	2	4	2	1	0.208503	0.950236	1.04811
ASXL3	16	8	0	0	8	7	0.208503	0.950236	0.726712
ATAD2	16	8	2	2	4	2	0.208503	0.950236	1.99574
CEPT1	16	8	1	1	6	1	0.208503	0.950236	4.76971
ELF4	16	8	0	1	7	3	0.208503	0.950236	3.46574
FAM177A1	16	8	0	2	6	3	0.208503	0.950236	2.69027
FNBP1	16	8	0	0	8	3	0.208503	0.950236	4.19245
NCRNA00247	16	8	2	0	6	3	0.208503	0.950236	2.69027
PSMB10	16	8	1	3	4	3	0.208503	0.950236	0.96441
SLC41A3	16	8	0	0	8	6	0.208503	0.950236	1.50218
SVIL	16	8	0	0	8	4	0.208503	0.950236	3.22804
WDR34	16	8	0	0	8	7	0.208503	0.950236	0.726712
DKFZP686I15217	57	23	12	10	1	1	0.208922	0.950236	0
IGDCC4	57	23	0	1	22	16	0.208922	0.950236	2.60295
HOMER1	24	11	0	3	8	4	0.211229	0.950236	3.22804
PRR19	24	11	0	1	10	5	0.211229	0.950236	3.66372
SORBS2	24	11	0	1	10	5	0.211229	0.950236	3.66372
HDGF	60	24	1	3	20	20	0.212331	0.950236	0
ACADSB	11	6	0	0	6	5	0.21306	0.950236	0.831229
ALKBH5	11	6	1	3	2	1	0.21306	0.950236	1.04811
ANGEL2	11	6	0	1	5	1	0.21306	0.950236	3.93848
ARHGAP32	11	6	0	0	6	2	0.21306	0.950236	3.7216
ATP5S	11	6	1	2	3	2	0.21306	0.950236	1.03133
C19orf43	11	6	0	2	4	3	0.21306	0.950236	0.96441
C1orf86	11	6	3	0	3	3	0.21306	0.950236	0
C6orf48	11	6	2	2	2	4	0.21306	0.950236	-1.99574
CCBL2	11	6	0	0	6	1	0.21306	0.950236	4.76971
DDR2	11	6	0	0	6	2	0.21306	0.950236	3.7216
DLX1	11	6	1	1	4	4	0.21306	0.950236	0
EIF2C3	11	6	0	0	6	3	0.21306	0.950236	2.69027
FLJ45244	11	6	0	0	6	0	0.21306	0.950236	5.46286
GTF2H3	11	6	0	0	6	7	0.21306	0.950236	-0.775464
GTF2IRD1	11	6	0	1	5	6	0.21306	0.950236	-0.831229
KBTBD4	11	6	3	0	3	3	0.21306	0.950236	0
LMLN	11	6	1	1	4	7	0.21306	0.950236	-2.50133
MANSC1	11	6	0	1	5	4	0.21306	0.950236	0.894632
NCRNA00265	11	6	2	1	3	2	0.21306	0.950236	1.03133
PLEKHA9	11	6	0	1	5	3	0.21306	0.950236	1.85904
RALY	11	6	1	0	5	4	0.21306	0.950236	0.894632
RBBP6	11	6	5	1	0	0	0.21306	0.950236	0
RBMXL1	11	6	0	0	6	1	0.21306	0.950236	4.76971
RPS23	11	6	1	0	5	5	0.21306	0.950236	0
SENP8	11	6	1	0	5	4	0.21306	0.950236	0.894632
SFMBT1	11	6	0	2	4	3	0.21306	0.950236	0.96441
SNHG10	11	6	3	3	0	0	0.21306	0.950236	0
[truncated: 9,196 more rows]

## Sheet: WNT positive reg. (low str.)
	Unsorted cells	Sorted cells					Derived from columns B and C		Derived from columns F and G
	All GT insertions in genes	Inactivating GT insertions in genes	Sense GT insetions in exons	Antisense GT insetions in exons	Sense GT insetions in introns	Antisense GT insetions in introns	p-value	FDR-corrected p-value	IGTIOB score
Total for dataset:	208561	104170	9151	8870	86149	87623
Gene
LRP6	38	155	11	7	137	12	6.79181e-41	8.42796e-37	25.5341
TFAP4	79	151	12	15	124	113	1.44068e-23	8.93868e-20	1.27107
SETD1B	13	71	18	18	35	27	4.55406e-22	1.88371e-18	2.50743
AXIN2	2	44	0	2	42	6	4.66112e-19	1.446e-15	14.9464
DOT1L	31	82	3	1	78	19	1.7712e-17	4.39577e-14	14.5967
CNOT2	12	49	0	1	48	7	6.21059e-14	1.28445e-10	15.6131
DEPDC5	28	66	0	1	65	21	3.04737e-13	5.40211e-10	11.5396
TRIP12	26	61	3	3	55	11	2.62416e-12	4.0704e-09	14.4683
MECOM	250	234	2	0	232	154	6.05651e-12	8.35058e-09	6.17139
NSD1	65	90	24	23	43	15	2.40197e-10	2.98061e-07	9.56917
TSC1	13	37	0	0	37	1	4.77524e-09	5.3869e-06	18.3966
BRD9	15	38	8	6	24	1	1.27785e-08	1.3214e-05	14.2548
MALAT1	93	101	42	59	0	0	5.83496e-08	5.56969e-05	0
HNRNPD	21	42	7	6	29	14	6.5237e-08	5.78233e-05	6.10925
CTNNB1	4	22	2	2	18	3	1.01503e-07	8.39704e-05	9.73517
CREBBP	33	50	1	0	49	4	4.60989e-07	0.000357526	18.3419
ILF3	39	54	4	2	48	16	8.59245e-07	0.000627199	10.2708
ZCCHC8	32	48	3	3	42	19	9.16885e-07	0.000630514	7.46193
FBXW7	53	65	2	1	62	19	9.6541e-07	0.000630514	11.8173
MLLT10	32	47	4	6	37	16	1.66682e-06	0.00103418	7.50913
KCTD5	1	14	5	3	6	2	2.1412e-06	0.00116578	3.7216
PATZ1	29	44	21	14	9	4	2.16352e-06	0.00116578	3.91202
NEUROG2	5	20	4	14	2	4	2.24281e-06	0.00116578	-1.99574
NPRL3	35	49	5	0	44	5	2.25472e-06	0.00116578	16.274
BCL9	80	83	0	0	83	33	2.66011e-06	0.00132037	10.383
TSC2	7	22	4	3	15	7	3.37425e-06	0.00161043	4.85203
GTF2I	33	46	4	4	38	8	4.87273e-06	0.00223947	12.3984
ZFP36L2	4	17	5	12	0	0	1.01546e-05	0.0045003	0
SETDB1	21	34	4	3	27	13	1.40649e-05	0.0060183	5.97126
RAD54L2	7	20	2	0	18	5	1.75763e-05	0.00727014	7.87613
SPCS1	9	22	2	5	15	9	2.03747e-05	0.00815579	3.44133
HNRNPA1	29	40	4	1	35	14	2.28768e-05	0.00860235	7.94647
HNRPA1L-2	29	40	4	1	35	14	2.28768e-05	0.00860235	7.94647
LOC100216545	32	42	17	25	0	0	2.91968e-05	0.010656	0
CNOT3	7	19	3	3	13	3	3.94428e-05	0.0137679	7.27524
SFRS1	29	39	11	13	15	22	4.03069e-05	0.0137679	-3.09325
C16orf72	8	20	3	4	13	8	4.21612e-05	0.0137679	3.08279
HOXA11	8	20	4	7	9	1	4.21612e-05	0.0137679	6.95587
TRIM8	10	22	6	9	7	0	4.46145e-05	0.0141954	6.23832
CXXC1	3	14	3	2	9	2	4.62185e-05	0.0143381	5.90776
NONO	20	31	3	2	26	16	5.33806e-05	0.0161561	4.09068
USP14	71	69	1	0	68	48	6.7497e-05	0.0199421	4.0127
OMG	107	93	39	42	12	12	7.46785e-05	0.0215508	0
ZCCHC14	6	17	2	1	14	5	8.09644e-05	0.0220236	5.94842
RNF146	2	12	0	0	12	2	8.15583e-05	0.0220236	7.75018
ADNP	41	47	2	0	45	17	8.16413e-05	0.0220236	9.0951
LRBA	164	129	2	5	122	64	8.7339e-05	0.0230594	8.26896
FLJ37453	75	70	31	30	9	5	0.000135509	0.0350318	3.01739
GPATCH8	15	25	0	0	25	13	0.000148411	0.0375843	5.26666
NPRL2	5	15	3	0	12	2	0.000165955	0.0411868	7.75018
FRAT2	12	22	9	13	0	0	0.000177876	0.0431746	0
LOC150197	6	16	8	8	0	0	0.000181571	0.0431746	0
LOC147727	30	37	21	16	0	0	0.000184403	0.0431746	0
LAMA4	2	11	1	2	8	2	0.000211188	0.0485303	5.22378
WAC	18	27	3	3	21	8	0.000217899	0.049162	6.81926
E2F7	3	12	0	0	12	3	0.000283076	0.0627266	6.71885
GANAB	14	23	0	0	23	6	0.000305405	0.0664872	9.1084
C11orf41	52	52	21	28	3	0	0.000319996	0.0678349	2.77259
RHOA	20	28	13	5	10	4	0.000325328	0.0678349	4.55836
ARID1A	13	22	3	3	16	2	0.000328284	0.0678349	9.83939
LOC153684	4	13	6	7	0	0	0.000338928	0.0678349	0
TUSC1	4	13	6	7	0	0	0.000338928	0.0678349	0
LOC401093	10	19	11	8	0	0	0.000389274	0.0766746	0
BCMO1	7	16	2	5	9	4	0.000411528	0.0797914	3.91202
ERF	56	54	0	0	54	54	0.000444304	0.084821	0
SOX21	15	23	15	8	0	0	0.000530255	0.0986264	0
TMEM20	2	10	1	1	8	2	0.000540462	0.0986264	5.22378
ZNF318	2	10	0	1	9	4	0.000540462	0.0986264	3.91202
KEAP1	37	40	1	1	38	22	0.000566488	0.101878	5.17979
KIAA0195	19	26	1	0	25	6	0.00064598	0.112901	9.85163
SMG1	19	26	12	12	2	1	0.00064598	0.112901	1.04811
ABHD14B	10	18	7	7	4	2	0.000777634	0.133784	1.99574
ILF2	4	12	0	0	12	7	0.00078703	0.133784	3.25312
ZNF638	7	15	0	0	15	6	0.000871874	0.146204	5.62749
TICAM1	40	41	18	16	7	5	0.000959196	0.158702	1.60669
TAL1	20	26	6	8	12	11	0.00101709	0.166067	0.583143
PIK3R1	12	19	2	0	17	1	0.00129898	0.201812	11.3595
AVL9	2	9	0	2	7	5	0.00136418	0.201812	1.60669
ZC3HAV1L	2	9	4	2	3	4	0.00136418	0.201812	-0.96441
ARAP1	0	6	1	0	5	1	0.00136612	0.201812	3.93848
CEMP1	0	6	2	4	0	0	0.00136612	0.201812	0
EIF4E1B	0	6	4	1	1	0	0.00136612	0.201812	0.693147
RAB5B	0	6	0	0	6	2	0.00136612	0.201812	3.7216
TERF2IP	0	6	2	2	2	0	0.00136612	0.201812	1.74126
PAN2	26	30	17	8	5	9	0.00140825	0.205589	-3.01739
TSPAN4	10	17	1	0	16	14	0.00152708	0.220344	1.0006
MAGIX	25	29	12	13	4	5	0.00159746	0.227849	-0.894632
HSPC159	72	61	19	28	14	7	0.00176622	0.245866	4.34173
EGLN1	4	11	6	3	2	3	0.00179591	0.245866	-1.03133
CEBPG	6	13	0	0	13	3	0.00186182	0.245866	7.27524
MAP3K3	5	12	0	1	11	3	0.00186247	0.245866	6.13571
MLL	5	12	2	3	7	4	0.00186247	0.245866	2.50133
RALGAPB	5	12	2	0	10	6	0.00186247	0.245866	2.83249
UBQLN2	5	12	7	5	0	0	0.00186247	0.245866	0
SMAD4	27	30	10	3	17	11	0.00203278	0.265524	3.14434
QTRT1	13	19	5	2	12	4	0.00220324	0.284792	5.75444
KIF9	43	41	0	0	41	30	0.0023375	0.299031	3.14205
GSK3A	12	18	1	0	17	6	0.00243731	0.308618	6.58977
TOMM40L	17	22	5	3	14	9	0.00252183	0.313806	2.93103
CITED1	1	7	4	0	3	1	0.00257944	0.313806	2.07944
FZD1	1	7	4	3	0	0	0.00257944	0.313806	0
KLHL31	1	7	1	3	3	0	0.00257944	0.313806	2.77259
HDX	11	17	10	5	2	1	0.00268533	0.323517	1.04811
LRRC8B	106	81	42	26	13	20	0.00275482	0.328698	-3.32468
CAPRIN1	41	39	3	1	35	23	0.00302743	0.357785	3.95527
WDR20	170	119	1	2	116	98	0.00312651	0.366008	2.25518
C14orf128	15	20	9	11	0	0	0.00319058	0.370018	0
RNF40	2	8	5	1	2	5	0.00338738	0.373415	-2.89037
STRA13	2	8	0	0	8	3	0.00338738	0.373415	4.19245
CNOT4	19	23	1	2	20	8	0.00340043	0.373415	6.40747
GSPT1	19	23	7	13	3	6	0.00340043	0.373415	-2.69027
NCOR1	19	23	1	0	22	4	0.00340043	0.373415	10.4466
NLRC5	19	23	11	6	6	7	0.00340043	0.373415	-0.775464
AHNAK	8	14	1	0	13	8	0.00346297	0.376948	3.08279
IER2	46	42	5	3	34	22	0.00352611	0.380482	4.05278
YDJC	33	33	14	10	9	9	0.00369779	0.395568	0
C8orf39	3	9	5	4	0	0	0.00383535	0.397582	0
PSMD9	3	9	2	0	7	3	0.00383535	0.397582	3.46574
YY1	3	9	4	4	1	2	0.00383535	0.397582	-1.04811
PHLPP2	5	11	1	1	9	2	0.00401545	0.397582	5.90776
ZNF358	5	11	0	0	11	2	0.00401545	0.397582	7.16704
C7orf43	0	5	2	2	1	1	0.0041011	0.397582	0
FZD2	0	5	2	3	0	0	0.0041011	0.397582	0
IL1RAP	0	5	1	0	4	1	0.0041011	0.397582	3.04385
PDLIM7	0	5	0	1	4	2	0.0041011	0.397582	1.99574
STAT2	0	5	1	0	4	2	0.0041011	0.397582	1.99574
XIRP2	0	5	0	0	5	4	0.0041011	0.397582	0.894632
ZNF226	0	5	1	1	3	6	0.0041011	0.397582	-2.69027
CLASP1	21	24	0	1	23	16	0.00441485	0.421675	2.9906
LOC100271722	38	36	4	4	28	12	0.00447148	0.421675	6.86682
DDX5	12	17	3	3	11	6	0.0044876	0.421675	3.44544
SLC25A35	12	17	6	8	3	0	0.0044876	0.421675	2.77259
EXOC6	50	44	1	0	43	38	0.00451952	0.421675	1.29613
TMEM26	44	40	8	7	25	22	0.00455659	0.421961	1.13088
FUNDC2	11	16	0	0	16	12	0.00500401	0.452076	2.08921
SLC35C1	11	16	6	7	3	3	0.00500401	0.452076	0
HUS1B	20	23	13	10	0	0	0.00502752	0.452076	0
SUN1	20	23	8	12	3	3	0.00502752	0.452076	0
DNAJC27	46	41	14	20	7	5	0.00516891	0.461446	1.60669
PPHLN1	30	30	3	2	25	22	0.00549439	0.486999	1.13088
LHX1	15	19	7	9	3	4	0.00560379	0.4897	-0.96441
TIAM2	15	19	0	2	17	10	0.00560379	0.4897	3.75728
FAM109B	19	22	8	13	1	0	0.0057263	0.496907	0.693147
TXNDC15	36	34	8	15	11	19	0.00580812	0.500507	-4.03904
LOC100289341	26	27	13	14	0	0	0.00596958	0.510872	0
COL4A3	91	69	17	15	37	32	0.00607532	0.516361	1.45203
AHSA2	9	14	3	8	3	2	0.00615089	0.519227	1.03133
C12orf66	14	18	3	1	14	6	0.00634088	0.529896	5.1172
CTPS2	32	31	10	14	7	5	0.00648826	0.529896	1.60669
ZC3HAV1	32	31	0	0	31	18	0.00648826	0.529896	4.82092
CLK3	18	21	3	8	10	5	0.00652334	0.529896	3.66372
ATP5G2	47	41	2	2	37	13	0.006602	0.529896	9.04196
PRDXDD1P	8	13	6	7	0	0	0.00676392	0.529896	0
RBM3	8	13	3	1	9	5	0.00676392	0.529896	3.01739
DPH2	1	6	2	0	4	2	0.00683241	0.529896	1.99574
HDAC6	1	6	1	1	4	0	0.00683241	0.529896	3.737
PITPNA	1	6	3	2	1	0	0.00683241	0.529896	0.693147
PPIL6	1	6	0	1	5	1	0.00683241	0.529896	3.93848
TREX1	1	6	3	3	0	0	0.00683241	0.529896	0
ZFPL1	1	6	1	2	3	1	0.00683241	0.529896	2.07944
GRRP1	7	12	6	6	0	2	0.00737914	0.55834	-1.74126
HSPC157	7	12	3	5	4	2	0.00737914	0.55834	1.99574
LOC202781	7	12	10	2	0	0	0.00737914	0.55834	0
TMEM129	7	12	4	4	4	8	0.00737914	0.55834	-3.22804
MIB1	34	32	2	0	30	20	0.00755476	0.567619	3.64014
ACSS1	6	11	2	1	8	6	0.00796256	0.567619	1.50218
SPTBN4	6	11	1	2	8	4	0.00796256	0.567619	3.22804
C16orf91	12	16	3	2	11	6	0.00809559	0.567619	3.44544
C12orf60	2	7	0	0	7	5	0.00824627	0.567619	1.60669
GALNT11	2	7	0	0	7	1	0.00824627	0.567619	5.54518
KIAA0754	2	7	5	2	0	0	0.00824627	0.567619	0
SDF2L1	2	7	2	3	2	3	0.00824627	0.567619	-1.03133
TTC25	2	7	1	2	4	2	0.00824627	0.567619	1.99574
ZXDB	2	7	3	4	0	0	0.00824627	0.567619	0
TMUB1	20	22	8	11	3	2	0.00828476	0.567619	1.03133
EPHA5	48	41	4	3	34	18	0.00835407	0.567619	5.72862
CN5H6.4	5	10	6	4	0	0	0.00845887	0.567619	0
CRYBG3	5	10	3	0	7	3	0.00845887	0.567619	3.46574
MRI1	5	10	2	1	7	2	0.00845887	0.567619	4.49707
NPM3	5	10	1	5	4	4	0.00845887	0.567619	0
SNRK	5	10	1	1	8	2	0.00845887	0.567619	5.22378
C1orf213	56	46	26	20	0	0	0.00875018	0.567619	0
KDM5C	4	9	5	1	3	2	0.00877929	0.567619	1.03133
MCM7	4	9	0	7	2	4	0.00877929	0.567619	-1.99574
RNPEP	4	9	0	0	9	2	0.00877929	0.567619	5.90776
STRAP	4	9	0	0	9	2	0.00877929	0.567619	5.90776
BLOC1S3	3	8	2	6	0	1	0.00878256	0.567619	-0.693147
CHCHD3	3	8	0	0	8	4	0.00878256	0.567619	3.22804
NRL	3	8	1	2	5	0	0.00878256	0.567619	4.63163
NTHL1	3	8	0	0	8	3	0.00878256	0.567619	4.19245
PGBD4	3	8	4	4	0	0	0.00878256	0.567619	0
RIC8A	3	8	0	6	2	2	0.00878256	0.567619	0
ARID1B	64	51	15	10	26	25	0.00889757	0.572072	0.356847
GPR173	11	15	0	1	14	7	0.00912877	0.583912	4.34173
MAST4	61	49	4	5	40	25	0.00923085	0.587414	4.58117
HIGD2B	32	30	6	6	18	12	0.00984183	0.623098	3.01632
WDR76	35	32	8	4	20	12	0.00990638	0.624001	3.88107
PODXL2	10	14	2	3	9	10	0.0102737	0.64387	-0.646333
HYAL1	14	17	4	13	0	1	0.0110002	0.67911	-0.693147
IGF2BP3	14	17	0	0	17	12	0.0110002	0.67911	2.56119
PNMA1	14	17	11	6	0	0	0.0110002	0.67911	0
TAOK1	34	31	1	0	30	18	0.0112983	0.694061	4.50488
DLG5	9	13	0	0	13	8	0.0115319	0.697601	3.08279
C14orf181	24	24	11	13	0	0	0.0122864	0.697601	0
SLC38A1	24	24	2	3	19	9	0.0122864	0.697601	5.29832
C2orf29	0	4	0	2	2	0	0.0123116	0.697601	1.74126
CD9	0	4	0	0	4	0	0.0123116	0.697601	3.737
CHMP1B	0	4	0	4	0	0	0.0123116	0.697601	0
COL1A1	0	4	1	0	3	0	0.0123116	0.697601	2.77259
IZUMO1	0	4	0	2	2	0	0.0123116	0.697601	1.74126
KCNK13	0	4	0	0	4	0	0.0123116	0.697601	3.737
LOC389333	0	4	2	2	0	0	0.0123116	0.697601	0
MAPKSP1	0	4	0	1	3	2	0.0123116	0.697601	1.03133
PPP1R14C	0	4	0	0	4	1	0.0123116	0.697601	3.04385
RPS2P32	0	4	1	3	0	0	0.0123116	0.697601	0
SNORD42B	0	4	2	2	0	0	0.0123116	0.697601	0
TBKBP1	0	4	1	3	0	0	0.0123116	0.697601	0
TSN	0	4	0	0	4	4	0.0123116	0.697601	0
WIT1	0	4	2	0	2	1	0.0123116	0.697601	1.04811
RLIM	17	19	1	0	18	9	0.012404	0.699642	4.85874
C11orf17	13	16	5	6	5	3	0.0125362	0.700728	1.85904
CNNM4	13	16	6	5	5	4	0.0125362	0.700728	0.894632
C10orf2	8	12	5	7	0	0	0.0128982	0.708205	0
CHD8	8	12	2	0	10	1	0.0128982	0.708205	7.60221
UBE3C	8	12	0	1	11	3	0.0128982	0.708205	6.13571
ZDHHC2	8	12	0	0	12	8	0.0128982	0.708205	2.5264
ATRN	12	15	1	2	12	7	0.0142847	0.758016	3.25312
CCR10	12	15	7	6	2	3	0.0142847	0.758016	-1.03133
ITPKC	12	15	1	4	10	4	0.0142847	0.758016	4.55836
KILLIN	12	15	10	5	0	0	0.0142847	0.758016	0
RAPH1	12	15	2	0	13	8	0.0142847	0.758016	3.08279
AGRP	7	11	6	5	0	3	0.0143552	0.758016	-2.77259
LOC144486	7	11	7	4	0	0	0.0143552	0.758016	0
MIA3	7	11	0	2	9	3	0.0143552	0.758016	4.87643
SMARCAD1	7	11	6	2	3	9	0.0143552	0.758016	-4.87643
CEP250	26	25	3	4	18	7	0.0144861	0.758474	6.26944
PRTFDC1	26	25	5	3	17	11	0.0144861	0.758474	3.14434
C14orf176	29	27	10	7	10	8	0.0146825	0.7645	1.33032
HUWE1	49	40	0	0	40	22	0.0147244	0.7645	5.71205
STX16	46	38	4	3	31	18	0.0152065	0.779189	4.82092
RFWD2	43	36	4	3	29	11	0.0156567	0.779189	7.78101
PDLIM2	6	10	3	4	3	0	0.0158646	0.779189	2.77259
PITPNM3	6	10	4	3	3	1	0.0158646	0.779189	2.07944
RIMS1	6	10	0	0	10	8	0.0158646	0.779189	1.33032
VPS18	6	10	3	1	6	3	0.0158646	0.779189	2.69027
AKNAD1	11	14	0	5	9	5	0.0162724	0.779189	3.01739
CDKN2A	25	24	1	2	21	16	0.0165938	0.779189	2.20364
C15orf37	5	9	4	5	0	0	0.0173516	0.779189	0
C19orf56	5	9	1	5	3	2	0.0173516	0.779189	1.03133
C1GALT1C1	5	9	0	0	9	7	0.0173516	0.779189	1.4107
EIF3L	5	9	2	0	7	3	0.0173516	0.779189	3.46574
FKBP14	5	9	3	4	2	2	0.0173516	0.779189	0
KANK3	5	9	3	0	6	2	0.0173516	0.779189	3.7216
MSL2	5	9	4	2	3	1	0.0173516	0.779189	2.07944
RARA	5	9	0	0	9	3	0.0173516	0.779189	4.87643
SLC26A1	5	9	2	1	6	5	0.0173516	0.779189	0.831229
ACN9	18	19	4	6	9	7	0.0176517	0.779189	1.4107
HSPA1L	18	19	5	2	12	14	0.0176517	0.779189	-1.08862
ATPAF1	1	5	0	0	5	3	0.017776	0.779189	1.85904
CCDC60	1	5	0	0	5	3	0.017776	0.779189	1.85904
FLJ36031	1	5	3	2	0	0	0.017776	0.779189	0
HDAC10	1	5	1	1	3	1	0.017776	0.779189	2.07944
IPO4	1	5	1	1	3	2	0.017776	0.779189	1.03133
KATNAL2	1	5	0	0	5	2	0.017776	0.779189	2.89037
METTL5	1	5	2	1	2	2	0.017776	0.779189	0
NAT9	1	5	1	0	4	5	0.017776	0.779189	-0.894632
RAB20	1	5	0	2	3	0	0.017776	0.779189	2.77259
SESN2	1	5	1	0	4	1	0.017776	0.779189	3.04385
ZNF432	1	5	2	0	3	5	0.017776	0.779189	-1.85904
C9orf95	10	13	1	0	12	5	0.0185273	0.779189	4.85981
INPP4A	10	13	0	0	13	7	0.0185273	0.779189	3.8095
MAPKBP1	10	13	3	1	9	7	0.0185273	0.779189	1.4107
PTGES2	10	13	3	1	9	0	0.0185273	0.779189	7.64902
SIGMAR1	10	13	3	5	5	7	0.0185273	0.779189	-1.60669
SMEK2	10	13	4	3	6	4	0.0185273	0.779189	1.72586
ZNF592	10	13	1	0	12	8	0.0185273	0.779189	2.5264
CXorf42	21	21	8	5	8	4	0.0185283	0.779189	3.22804
NKX2-2	21	21	10	10	1	9	0.0185283	0.779189	-6.95587
C9orf69	14	16	2	2	12	6	0.0186704	0.779189	4.02858
CAMK1D	14	16	1	1	14	15	0.0186704	0.779189	-0.510299
C4orf49	4	8	2	5	1	2	0.018677	0.779189	-1.04811
DNAJC30	4	8	4	4	0	0	0.018677	0.779189	0
LOC25845	4	8	3	2	3	3	0.018677	0.779189	0
POLN	4	8	0	0	8	0	0.018677	0.779189	6.96504
PRCP	4	8	0	0	8	2	0.018677	0.779189	5.22378
SCN7A	4	8	3	2	3	0	0.018677	0.779189	2.77259
TBX3	4	8	4	4	0	4	0.018677	0.779189	-3.737
TENC1	4	8	0	3	5	3	0.018677	0.779189	1.85904
SPEN	78	57	2	0	55	37	0.0189306	0.779189	4.28686
COL4A6	33	29	2	1	26	25	0.0189936	0.779189	0.356847
FBXL17	33	29	0	2	27	8	0.0189936	0.779189	9.05405
MTF2	24	23	0	0	23	7	0.019021	0.779189	8.33293
ANKRD10	3	7	1	0	6	1	0.0195837	0.779189	4.76971
C17orf71	3	7	4	3	0	0	0.0195837	0.779189	0
C1orf58	3	7	0	0	7	1	0.0195837	0.779189	5.54518
CBX8	3	7	2	1	4	4	0.0195837	0.779189	0
COLEC12	3	7	1	2	4	1	0.0195837	0.779189	3.04385
CYP20A1	3	7	1	2	4	4	0.0195837	0.779189	0
EID2	3	7	2	5	0	0	0.0195837	0.779189	0
HIVEP3	3	7	0	1	6	4	0.0195837	0.779189	1.72586
MPZL3	3	7	1	0	6	2	0.0195837	0.779189	3.7216
PRICKLE3	3	7	1	0	6	5	0.0195837	0.779189	0.831229
ZFP62	3	7	0	0	7	4	0.0195837	0.779189	2.50133
C6orf162	2	6	2	0	4	0	0.0195913	0.779189	3.737
CD55	2	6	2	0	4	2	0.0195913	0.779189	1.99574
DPM3	2	6	4	1	1	1	0.0195913	0.779189	0
EIF4EBP2	2	6	1	0	5	2	0.0195913	0.779189	2.89037
LRRC23	2	6	1	4	1	0	0.0195913	0.779189	0.693147
NPEPL1	2	6	0	1	5	0	0.0195913	0.779189	4.63163
NR2C1	2	6	0	0	6	1	0.0195913	0.779189	4.76971
SLC35A2	2	6	1	1	4	3	0.0195913	0.779189	0.96441
TUG1	2	6	4	2	0	0	0.0195913	0.779189	0
LRRTM3	65	49	16	19	14	15	0.019654	0.779189	-0.510299
CCDC64	17	18	1	0	17	8	0.0202806	0.793887	5.0876
DNAJA2	17	18	5	6	7	5	0.0202806	0.793887	1.60669
LYPLAL1	17	18	0	2	16	7	0.0202806	0.793887	5.34233
NES	17	18	2	1	15	8	0.0202806	0.793887	4.12532
FAM193A	9	12	0	0	12	5	0.0210773	0.814794	4.85981
ITPRIP	9	12	0	0	12	13	0.0210773	0.814794	-0.556387
LOC100288730	9	12	5	6	1	0	0.0210773	0.814794	0.693147
TAPBP	9	12	3	1	8	7	0.0210773	0.814794	0.726712
SOX12	13	15	8	7	0	0	0.021426	0.8257	0
HIRIP3	29	26	14	10	2	3	0.0219336	0.842643	-1.03133
BST2	40	33	6	7	20	21	0.0228468	0.875018	-0.411784
E2F8	16	17	3	1	13	4	0.0233237	0.881787	6.31083
EML3	16	17	4	3	10	14	0.0233237	0.881787	-2.2847
IL17RE	16	17	8	6	3	2	0.0233237	0.881787	1.03133
ZNF80	16	17	6	11	0	0	0.0233237	0.881787	0
SLC38A9	37	31	10	15	6	8	0.0235629	0.881787	-1.50218
CCDC106	8	11	2	4	5	2	0.0239473	0.881787	2.89037
EGFLAM	8	11	0	1	10	9	0.0239473	0.881787	0.646333
MAGEF1	8	11	7	4	0	0	0.0239473	0.881787	0
PHTF2	8	11	0	0	11	7	0.0239473	0.881787	2.66997
PLIN1	8	11	5	4	2	1	0.0239473	0.881787	1.04811
RGS9BP	8	11	4	7	0	0	0.0239473	0.881787	0
SRI	8	11	1	0	10	9	0.0239473	0.881787	0.646333
ZNF346	8	11	1	0	10	2	0.0239473	0.881787	6.5541
DIS3L	124	83	8	11	64	47	0.0240745	0.883846	3.51918
NRM	19	19	5	6	8	9	0.0244667	0.895596	-0.683985
CCDC142	12	14	7	7	0	0	0.0246067	0.898071	0
ABCC1	50	39	2	0	37	17	0.0249263	0.906216	7.03716
TNKS	22	21	0	0	21	11	0.0250489	0.906216	4.876
UPRT	22	21	2	3	16	8	0.0250489	0.906216	4.61562
FAM108C1	65	48	21	11	16	22	0.0261122	0.928218	-2.60295
CENPV	36	30	6	1	23	17	0.0267828	0.928218	2.51862
ANKRD11	52	40	0	0	40	16	0.02679	0.928218	8.315
LOC285847	52	40	6	9	25	21	0.02679	0.928218	1.53019
C19orf23	15	16	7	3	6	1	0.026852	0.928218	4.76971
CALD1	15	16	0	0	16	13	0.026852	0.928218	1.53283
E2F3	15	16	5	5	6	10	0.026852	0.928218	-2.83249
GAPDHS	15	16	2	5	9	5	0.026852	0.928218	3.01739
C7orf59	7	10	1	0	9	1	0.0271531	0.928218	6.95587
CSNK2A1	7	10	1	0	9	4	0.0271531	0.928218	3.91202
DBF4	7	10	0	1	9	3	0.0271531	0.928218	4.87643
GLTSCR1	7	10	0	0	10	11	0.0271531	0.928218	-0.612942
INO80E	7	10	1	3	6	9	0.0271531	0.928218	-2.18616
INPPL1	7	10	2	1	7	6	0.0271531	0.928218	0.775464
PHC2	7	10	0	0	10	4	0.0271531	0.928218	4.55836
QRICH1	7	10	2	0	8	4	0.0271531	0.928218	3.22804
RNF125	7	10	2	0	8	4	0.0271531	0.928218	3.22804
TIPARP	7	10	3	2	5	3	0.0271531	0.928218	1.85904
TRMT11	7	10	0	1	9	2	0.0271531	0.928218	5.90776
VSIG10	7	10	3	1	6	3	0.0271531	0.928218	2.69027
PDK3	30	26	4	11	11	10	0.0282179	0.928592	0.612942
PHF7	30	26	3	3	20	8	0.0282179	0.928592	6.40747
ANKLE1	11	13	2	3	8	9	0.0282816	0.928592	-0.683985
CCT6B	11	13	1	0	12	13	0.0282816	0.928592	-0.556387
GDF3	11	13	2	2	9	7	0.0282816	0.928592	1.4107
HIST2H2BE	11	13	9	4	0	0	0.0282816	0.928592	0
NRARP	11	13	5	8	0	0	0.0282816	0.928592	0
SNHG10	11	13	6	7	0	0	0.0282816	0.928592	0
PRRT2	27	24	15	8	1	1	0.028693	0.928592	0
FKBP10	21	20	4	4	12	12	0.0287816	0.928592	0
CYB5D2	24	22	4	7	11	2	0.0289143	0.928592	7.16704
DNM1P35	6	9	6	3	0	0	0.0306907	0.928592	0
FAM118A	6	9	5	2	2	1	0.0306907	0.928592	1.04811
LOC100128164	6	9	5	4	0	0	0.0306907	0.928592	0
PLCB3	6	9	5	1	3	3	0.0306907	0.928592	0
UCK1	6	9	4	1	4	3	0.0306907	0.928592	0.96441
BDH1	14	15	5	2	8	7	0.0309508	0.928592	0.726712
SALL1	14	15	1	0	14	10	0.0309508	0.928592	2.2847
ZNF219	48	37	5	10	22	23	0.0316283	0.928592	-0.387655
JAM2	29	25	1	2	22	30	0.0322235	0.928592	-2.82904
SH3GL3	109	73	1	0	72	61	0.0322748	0.928592	1.98342
IMMP1L	17	17	0	0	17	9	0.032441	0.928592	4.40361
CEBPB	10	12	8	4	0	0	0.0325318	0.928592	0
GMPR2	10	12	5	7	0	4	0.0325318	0.928592	-3.737
RNF111	26	23	1	2	20	11	0.0328449	0.928592	4.46421
LOC100128191	20	19	7	12	0	1	0.0331018	0.928592	-0.693147
NAALADL2	60	44	1	0	43	26	0.0344094	0.928592	4.98819
ATP6V0E2	5	8	3	4	1	2	0.0345133	0.928592	-1.04811
C11orf61	5	8	1	0	7	3	0.0345133	0.928592	3.46574
C2orf16	5	8	2	6	0	0	0.0345133	0.928592	0
CTH	5	8	0	0	8	3	0.0345133	0.928592	4.19245
IMPG1	5	8	1	1	6	5	0.0345133	0.928592	0.831229
LOC100272217	5	8	3	5	0	0	0.0345133	0.928592	0
MADD	5	8	2	2	4	6	0.0345133	0.928592	-1.72586
MSN	5	8	0	0	8	2	0.0345133	0.928592	5.22378
PDE9A	5	8	0	1	7	7	0.0345133	0.928592	0
RAB3A	5	8	1	0	7	4	0.0345133	0.928592	2.50133
SHMT2	5	8	1	5	2	3	0.0345133	0.928592	-1.03133
WDR5B	5	8	6	2	0	0	0.0345133	0.928592	0
ZNF639	5	8	1	1	6	1	0.0345133	0.928592	4.76971
C14orf159	34	28	6	7	15	8	0.0346201	0.928592	4.12532
MLLT11	47	36	3	5	28	16	0.0356167	0.928592	4.7776
HNRNPA2B1	13	14	3	2	9	10	0.0357226	0.928592	-0.646333
PAPSS2	13	14	2	1	11	11	0.0357226	0.928592	0
PAX5	13	14	0	0	14	12	0.0357226	0.928592	1.08862
DKFZP686I15217	57	42	25	17	0	1	0.0363541	0.928592	-0.693147
CHIC1	28	24	10	4	10	12	0.0368137	0.928592	-1.19609
NMRAL1	28	24	6	8	10	9	0.0368137	0.928592	0.646333
AGFG1	0	3	0	1	2	2	0.03696	0.928592	0
AVPI1	0	3	1	0	2	1	0.03696	0.928592	1.04811
C1orf38	0	3	0	0	3	0	0.03696	0.928592	2.77259
C22orf9	0	3	0	0	3	1	0.03696	0.928592	2.07944
C2CD4A	0	3	2	1	0	1	0.03696	0.928592	-0.693147
CDK8	0	3	0	0	3	2	0.03696	0.928592	1.03133
CHPF	0	3	0	1	2	0	0.03696	0.928592	1.74126
DDIT4L	0	3	0	1	2	0	0.03696	0.928592	1.74126
EVL	0	3	0	0	3	0	0.03696	0.928592	2.77259
GABBR1	0	3	0	0	3	2	0.03696	0.928592	1.03133
GALNT4	0	3	1	2	0	0	0.03696	0.928592	0
HIST1H2AK	0	3	1	2	0	0	0.03696	0.928592	0
HMX2	0	3	2	1	0	0	0.03696	0.928592	0
JPH3	0	3	0	1	2	1	0.03696	0.928592	1.04811
LOC100216001	0	3	0	0	3	0	0.03696	0.928592	2.77259
LOC222699	0	3	3	0	0	0	0.03696	0.928592	0
LOC285733	0	3	0	0	3	0	0.03696	0.928592	2.77259
MAT1A	0	3	2	1	0	0	0.03696	0.928592	0
METTL7B	0	3	1	1	1	0	0.03696	0.928592	0.693147
MIR302C	0	3	1	2	0	0	0.03696	0.928592	0
MYCBP	0	3	0	0	3	1	0.03696	0.928592	2.07944
MYCN	0	3	0	0	3	2	0.03696	0.928592	1.03133
NAT6	0	3	0	1	2	1	0.03696	0.928592	1.04811
NUMBL	0	3	0	0	3	1	0.03696	0.928592	2.07944
PLAC1L	0	3	0	0	3	0	0.03696	0.928592	2.77259
PLXND1	0	3	3	0	0	0	0.03696	0.928592	0
RAB34	0	3	0	1	2	0	0.03696	0.928592	1.74126
RAPGEFL1	0	3	1	1	1	0	0.03696	0.928592	0.693147
RFX8	0	3	0	0	3	2	0.03696	0.928592	1.03133
RHBDL2	0	3	0	0	3	0	0.03696	0.928592	2.77259
RNF31	0	3	2	1	0	0	0.03696	0.928592	0
SERPINE1	0	3	1	2	0	0	0.03696	0.928592	0
SLC30A3	0	3	0	1	2	3	0.03696	0.928592	-1.03133
SLC35E1	0	3	2	1	0	0	0.03696	0.928592	0
SLC9A3R2	0	3	2	0	1	0	0.03696	0.928592	0.693147
SMARCA5	0	3	2	0	1	2	0.03696	0.928592	-1.04811
STX4	0	3	0	2	1	0	0.03696	0.928592	0.693147
TIMM17B	0	3	0	0	3	2	0.03696	0.928592	1.03133
ZNF23	0	3	1	1	1	1	0.03696	0.928592	0
ZNF606	0	3	1	0	2	2	0.03696	0.928592	0
ZNF678	0	3	1	0	2	2	0.03696	0.928592	0
ZNF772	0	3	0	2	1	0	0.03696	0.928592	0.693147
DNAL1	16	16	0	2	14	16	0.0374233	0.928592	-1.0006
ARID4B	9	11	1	2	8	3	0.0374517	0.928592	4.19245
BTBD19	9	11	4	6	1	0	0.0374517	0.928592	0.693147
C18orf34	9	11	0	2	9	7	0.0374517	0.928592	1.4107
MRPS21	9	11	6	2	3	1	0.0374517	0.928592	2.07944
RBM43	9	11	0	0	11	5	0.0374517	0.928592	4.27667
SLC37A4	9	11	2	1	8	6	0.0374517	0.928592	1.50218
TG	9	11	2	1	8	6	0.0374517	0.928592	1.50218
SLC1A5	25	22	5	9	8	7	0.0376205	0.928592	0.726712
SPHK2	36	29	0	2	27	27	0.0378558	0.928592	0
ATXN3	22	20	6	12	2	3	0.0381028	0.928592	-1.03133
FBXL15	22	20	6	8	6	8	0.0381028	0.928592	-1.50218
LOC388796	22	20	8	5	7	8	0.0381028	0.928592	-0.726712
PRRG2	22	20	10	9	1	2	0.0381028	0.928592	-1.04811
SPATS2L	22	20	5	1	14	14	0.0381028	0.928592	0
SSBP3	22	20	0	0	20	8	0.0381028	0.928592	6.40747
HMMR	19	18	0	0	18	13	0.0381099	0.928592	2.45994
C12orf5	4	7	0	0	7	2	0.0384857	0.928592	4.49707
C19orf57	4	7	0	0	7	1	0.0384857	0.928592	5.54518
DHX36	4	7	0	0	7	4	0.0384857	0.928592	2.50133
GLIPR1L2	4	7	0	0	7	0	0.0384857	0.928592	6.23832
HSD17B1	4	7	3	1	3	1	0.0384857	0.928592	2.07944
LEMD3	4	7	3	3	1	0	0.0384857	0.928592	0.693147
LOC653653	4	7	2	5	0	0	0.0384857	0.928592	0
PDIA3	4	7	1	1	5	3	0.0384857	0.928592	1.85904
PRDX4	4	7	1	1	5	4	0.0384857	0.928592	0.894632
SC65	4	7	2	2	3	7	0.0384857	0.928592	-3.46574
SELT	4	7	0	0	7	3	0.0384857	0.928592	3.46574
SLC38A10	4	7	2	1	4	3	0.0384857	0.928592	0.96441
SYNPO2	4	7	0	0	7	10	0.0384857	0.928592	-2.05703
WAPAL	4	7	0	2	5	3	0.0384857	0.928592	1.85904
ZBTB43	4	7	0	0	7	6	0.0384857	0.928592	0.775464
ZFAND1	4	7	0	0	7	2	0.0384857	0.928592	4.49707
ZKSCAN1	4	7	0	0	7	4	0.0384857	0.928592	2.50133
LPIN2	41	32	11	9	12	16	0.0392421	0.928592	-2.08921
NYX	41	32	15	12	5	1	0.0392421	0.928592	3.93848
IMMP2L	95	64	1	0	63	51	0.0396062	0.928592	2.42947
IFT172	30	25	2	4	19	14	0.0407985	0.928592	2.36728
CSDE1	12	13	1	5	7	6	0.0412916	0.928592	0.775464
FOXN2	12	13	0	1	12	11	0.0412916	0.928592	0.583143
STOX2	12	13	1	5	7	7	0.0412916	0.928592	0
KIAA1217	27	23	1	2	20	18	0.0420769	0.928592	0.864746
MAT2B	27	23	0	2	21	12	0.0420769	0.928592	4.29285
AATK	3	6	1	0	5	4	0.0422814	0.928592	0.894632
ABCA5	3	6	1	1	4	1	0.0422814	0.928592	3.04385
ARHGDIG	3	6	1	0	5	2	0.0422814	0.928592	2.89037
ARL6IP6	3	6	1	3	2	0	0.0422814	0.928592	1.74126
B3GNT2	3	6	0	0	6	0	0.0422814	0.928592	5.46286
C10orf26	3	6	0	0	6	3	0.0422814	0.928592	2.69027
CIDEA	3	6	0	0	6	5	0.0422814	0.928592	0.831229
GOLGA2B	3	6	3	2	1	1	0.0422814	0.928592	0
ICAM1	3	6	4	0	2	0	0.0422814	0.928592	1.74126
LUZP1	3	6	0	0	6	4	0.0422814	0.928592	1.72586
NBEAL2	3	6	0	0	6	1	0.0422814	0.928592	4.76971
NUP98	3	6	0	0	6	4	0.0422814	0.928592	1.72586
PACSIN3	3	6	3	1	2	2	0.0422814	0.928592	0
PAQR4	3	6	3	2	1	0	0.0422814	0.928592	0.693147
POT1	3	6	0	3	3	1	0.0422814	0.928592	2.07944
PQBP1	3	6	3	2	1	0	0.0422814	0.928592	0.693147
PRICKLE2	3	6	1	1	4	0	0.0422814	0.928592	3.737
ZFPM2	3	6	0	0	6	5	0.0422814	0.928592	0.831229
CNBP	24	21	0	0	21	11	0.0431183	0.928592	4.876
AKAP10	8	10	1	0	9	9	0.0431506	0.928592	0
BLOC1S1	8	10	0	0	10	3	0.0431506	0.928592	5.52277
C3orf71	8	10	3	7	0	0	0.0431506	0.928592	0
CHAC2	8	10	2	0	8	5	0.0431506	0.928592	2.33341
DYX1C1	8	10	2	2	6	4	0.0431506	0.928592	1.72586
FRMD4A	8	10	0	0	10	7	0.0431506	0.928592	2.05703
FUT11	8	10	4	3	3	1	0.0431506	0.928592	2.07944
HNRPDL	8	10	5	4	1	1	0.0431506	0.928592	0
LOC100288428	8	10	0	1	9	7	0.0431506	0.928592	1.4107
TNRC6A	8	10	0	0	10	3	0.0431506	0.928592	5.52277
C12orf24	15	15	2	0	13	7	0.0432312	0.928592	3.8095
FZD6	15	15	3	2	10	6	0.0432312	0.928592	2.83249
TRPC1	15	15	0	3	12	4	0.0432312	0.928592	5.75444
ANLN	18	17	0	0	17	15	0.0439258	0.928592	0.962279
COPS7A	18	17	3	9	5	7	0.0439258	0.928592	-1.60669
RAB26	18	17	7	4	6	5	0.0439258	0.928592	0.831229
TIAL1	18	17	1	1	15	5	0.0439258	0.928592	6.45872
MYO18A	45	34	0	0	34	30	0.0451343	0.928592	1.22374
ACAD9	2	5	0	2	3	3	0.045135	0.928592	0
BAG5	2	5	2	2	1	3	0.045135	0.928592	-2.07944
CCDC79	2	5	1	0	4	1	0.045135	0.928592	3.04385
CECR4	2	5	1	0	4	0	0.045135	0.928592	3.737
CYB5R2	2	5	1	1	3	0	0.045135	0.928592	2.77259
EPHB1	2	5	0	0	5	1	0.045135	0.928592	3.93848
HERC6	2	5	2	1	2	0	0.045135	0.928592	1.74126
HIST1H1D	2	5	3	2	0	0	0.045135	0.928592	0
HOXA9	2	5	3	1	1	0	0.045135	0.928592	0.693147
HSP90B1	2	5	0	1	4	1	0.045135	0.928592	3.04385
IKBKB	2	5	1	3	1	4	0.045135	0.928592	-3.04385
KCNK1	2	5	1	0	4	2	0.045135	0.928592	1.99574
KIF2A	2	5	0	1	4	5	0.045135	0.928592	-0.894632
LHX4	2	5	0	1	4	4	0.045135	0.928592	0
LOC93622	2	5	2	1	2	1	0.045135	0.928592	1.04811
MAP3K11	2	5	2	3	0	0	0.045135	0.928592	0
MRPS11	2	5	0	0	5	6	0.045135	0.928592	-0.831229
OTUD5	2	5	0	0	5	5	0.045135	0.928592	0
PLCL1	2	5	0	0	5	2	0.045135	0.928592	2.89037
PLSCR4	2	5	0	0	5	2	0.045135	0.928592	2.89037
PPM1L	2	5	0	1	4	6	0.045135	0.928592	-1.72586
PRDX1	2	5	1	1	3	1	0.045135	0.928592	2.07944
RALB	2	5	0	0	5	3	0.045135	0.928592	1.85904
SLC25A1	2	5	2	1	2	1	0.045135	0.928592	1.04811
SMOC1	2	5	0	0	5	0	0.045135	0.928592	4.63163
ZDHHC15	2	5	3	0	2	1	0.045135	0.928592	1.04811
ZXDC	2	5	1	1	3	0	0.045135	0.928592	2.77259
ANKRD45	1	4	0	0	4	0	0.0451536	0.928592	3.737
ARL4A	1	4	1	3	0	1	0.0451536	0.928592	-0.693147
ARL6	1	4	0	0	4	1	0.0451536	0.928592	3.04385
C10orf88	1	4	2	0	2	2	0.0451536	0.928592	0
C12orf42	1	4	1	1	2	0	0.0451536	0.928592	1.74126
C16orf42	1	4	3	0	1	1	0.0451536	0.928592	0
C22orf46	1	4	2	2	0	0	0.0451536	0.928592	0
CCL28	1	4	0	0	4	0	0.0451536	0.928592	3.737
CEP72	1	4	0	0	4	1	0.0451536	0.928592	3.04385
CIB1	1	4	0	1	3	1	0.0451536	0.928592	2.07944
COL27A1	1	4	0	0	4	0	0.0451536	0.928592	3.737
CRELD1	1	4	4	0	0	0	0.0451536	0.928592	0
DDX24	1	4	0	0	4	2	0.0451536	0.928592	1.99574
DHX16	1	4	1	0	3	3	0.0451536	0.928592	0
FAM40B	1	4	0	0	4	2	0.0451536	0.928592	1.99574
FAM83C	1	4	3	1	0	0	0.0451536	0.928592	0
FIBP	1	4	2	1	1	3	0.0451536	0.928592	-2.07944
FUBP3	1	4	0	0	4	3	0.0451536	0.928592	0.96441
HHLA3	1	4	0	1	3	2	0.0451536	0.928592	1.03133
HIST1H3H	1	4	3	1	0	0	0.0451536	0.928592	0
HRAS	1	4	1	1	2	1	0.0451536	0.928592	1.04811
HRASLS	1	4	1	0	3	0	0.0451536	0.928592	2.77259
IARS2	1	4	1	0	3	1	0.0451536	0.928592	2.07944
KIAA0317	1	4	0	0	4	2	0.0451536	0.928592	1.99574
KIT	1	4	0	2	2	2	0.0451536	0.928592	0
LIMK1	1	4	0	0	4	0	0.0451536	0.928592	3.737
LOC100287227	1	4	1	3	0	0	0.0451536	0.928592	0
ODF2L	1	4	0	0	4	0	0.0451536	0.928592	3.737
PAK6	1	4	0	1	3	0	0.0451536	0.928592	2.77259
PDZD7	1	4	1	1	2	1	0.0451536	0.928592	1.04811
RAB40B	1	4	0	1	3	3	0.0451536	0.928592	0
RAC3	1	4	0	1	3	1	0.0451536	0.928592	2.07944
RARRES1	1	4	0	0	4	1	0.0451536	0.928592	3.04385
RND2	1	4	1	0	3	0	0.0451536	0.928592	2.77259
RPGR	1	4	0	0	4	0	0.0451536	0.928592	3.737
RRS1	1	4	1	3	0	0	0.0451536	0.928592	0
SEC23A	1	4	0	0	4	0	0.0451536	0.928592	3.737
SGTB	1	4	0	0	4	0	0.0451536	0.928592	3.737
STYXL1	1	4	0	0	4	5	0.0451536	0.928592	-0.894632
TMC4	1	4	2	1	1	0	0.0451536	0.928592	0.693147
TMCC2	1	4	3	0	1	0	0.0451536	0.928592	0.693147
TMEM9	1	4	1	1	2	0	0.0451536	0.928592	1.74126
VCPIP1	1	4	2	2	0	0	0.0451536	0.928592	0
CYP7B1	60	43	0	0	43	48	0.0451986	0.928592	-1.19192
LOC100128675	151	95	2	1	92	77	0.0459548	0.942566	2.25572
C12orf40	11	12	0	0	12	7	0.0478095	0.975769	3.25312
CNTNAP5	11	12	0	0	12	6	0.0478095	0.975769	4.02858
FAM57A	11	12	2	0	10	10	0.0478095	0.975769	0
LOC100131691	47	35	3	4	28	25	0.0480692	0.9772	1.04377
CCDC77	26	22	0	1	21	17	0.0481158	0.9772	1.73166
FEZ2	26	22	0	1	21	24	0.0481158	0.9772	-1.1637
MPDU1	34	27	0	2	25	19	0.0487478	0.984662	2.36715
ADAM12	95	63	1	0	62	66	0.0493522	0.984662	-0.741364
ARIH2	23	20	1	0	19	12	0.049454	0.984662	3.4559
GPATCH1	23	20	6	1	13	10	0.049454	0.984662	1.75247
BCDIN3D	7	9	3	1	5	5	0.0497528	0.984662	0
F2R	7	9	0	0	9	3	0.0497528	0.984662	4.87643
FAM189B	7	9	2	4	3	2	0.0497528	0.984662	1.03133
LAMB2	7	9	2	5	2	2	0.0497528	0.984662	0
LY75	7	9	0	0	9	4	0.0497528	0.984662	3.91202
PIGS	7	9	1	1	7	3	0.0497528	0.984662	3.46574
PYCR2	7	9	0	0	9	2	0.0497528	0.984662	5.90776
SGTA	7	9	0	0	9	4	0.0497528	0.984662	3.91202
SHROOM2	7	9	0	0	9	8	0.0497528	0.984662	0.683985
SMARCC2	7	9	1	1	7	3	0.0497528	0.984662	3.46574
TRPM8	7	9	0	2	7	3	0.0497528	0.984662	3.46574
WDR47	7	9	0	0	9	4	0.0497528	0.984662	3.91202
C19orf39	14	14	4	6	4	4	0.0500192	0.985219	0
LHX9	14	14	4	2	8	5	0.0500192	0.985219	2.33341
LOC388428	14	14	5	5	4	4	0.0500192	0.985219	0
CDKN2C	17	16	2	4	10	7	0.0506936	0.992203	2.05703
LSR	17	16	9	3	4	2	0.0506936	0.992203	1.99574
TRIM65	17	16	0	2	14	10	0.0506936	0.992203	2.2847
ZNF689	17	16	4	5	7	3	0.0506936	0.992203	3.46574
HHIP	31	25	2	2	21	16	0.0509442	0.995538	2.20364
C1orf43	66	46	6	4	36	32	0.0519507	1	1.17315
NF1	236	141	2	3	136	113	0.0525816	1	2.56026
TMCC1	41	31	2	2	27	21	0.0536298	1	2.2348
HMOX2	51	37	4	5	28	13	0.0538923	1	6.31043
DSCR3	68	47	0	0	47	29	0.0541809	1	4.93121
F10	25	21	0	0	21	14	0.0550496	1	3.20424
MIP	25	21	10	11	0	1	0.0550496	1	-0.693147
RFFL	63	44	0	0	44	46	0.0552229	1	-0.480356
ACHE	10	11	7	4	0	0	0.0554635	1	0
ARFGEF2	10	11	1	0	10	5	0.0554635	1	3.66372
C9orf43	10	11	3	7	1	4	0.0554635	1	-3.04385
LYSMD1	10	11	5	4	2	1	0.0554635	1	1.04811
MEN1	10	11	2	4	5	1	0.0554635	1	3.93848
RECQL5	10	11	3	0	8	5	0.0554635	1	2.33341
RHOQ	10	11	0	0	11	6	0.0554635	1	3.44544
TNFSF12-TNFSF13	10	11	4	2	5	2	0.0554635	1	2.89037
ZNF747	10	11	6	2	3	0	0.0554635	1	2.77259
MLL5	58	41	2	1	38	23	0.0561059	1	4.79214
NCRNA00182	70	48	0	0	48	33	0.0563981	1	3.91121
HOXB3	38	29	18	9	2	3	0.0565871	1	-1.03133
ATG2B	22	19	3	1	15	9	0.0567634	1	3.44133
C10orf95	22	19	9	8	2	1	0.0567634	1	1.04811
ABHD3	43	32	0	2	30	20	0.0571329	1	3.64014
ANO5	6	8	2	1	5	4	0.0573956	1	0.894632
CA12	6	8	0	0	8	5	0.0573956	1	2.33341
CASP2	6	8	0	0	8	4	0.0573956	1	3.22804
DHRS3	6	8	0	3	5	6	0.0573956	1	-0.831229
DIS3L2	6	8	0	0	8	5	0.0573956	1	2.33341
FAHD1	6	8	5	1	2	3	0.0573956	1	-1.03133
FEM1C	6	8	1	3	4	3	0.0573956	1	0.96441
GRHL3	6	8	1	0	7	1	0.0573956	1	5.54518
IRAK1BP1	6	8	2	1	5	1	0.0573956	1	3.93848
LOC80054	6	8	3	5	0	0	0.0573956	1	0
LRRC59	6	8	0	0	8	5	0.0573956	1	2.33341
OPRL1	6	8	2	0	6	3	0.0573956	1	2.69027
PLOD3	6	8	4	2	2	3	0.0573956	1	-1.03133
RIPK2	6	8	2	0	6	0	0.0573956	1	5.46286
SNHG8	6	8	4	2	2	3	0.0573956	1	-1.03133
TBC1D10B	6	8	3	3	2	3	0.0573956	1	-1.03133
THAP4	30	24	0	0	24	12	0.057965	1	5.45656
C1orf156	13	13	5	3	5	7	0.0579764	1	-1.60669
CCDC71	13	13	0	0	13	9	0.0579764	1	2.39881
DCLRE1A	13	13	7	6	0	0	0.0579764	1	0
GCNT1	13	13	0	0	13	15	0.0579764	1	-1.04253
INCA1	13	13	6	6	1	1	0.0579764	1	0
LOC139201	13	13	3	4	6	2	0.0579764	1	3.7216
P4HA1	13	13	0	0	13	7	0.0579764	1	3.8095
SLC19A1	13	13	0	0	13	10	0.0579764	1	1.75247
CACNA1C	19	17	8	3	6	2	0.0580346	1	3.7216
DDX6	19	17	1	0	16	7	0.0580346	1	5.34233
GTF2E2	19	17	0	0	17	9	0.0580346	1	4.40361
LRRC41	19	17	1	1	15	26	0.0580346	1	-4.58098
TLE3	19	17	0	2	15	4	0.0580346	1	7.35336
TMEM138	19	17	1	0	16	11	0.0580346	1	2.67236
LRRC1	265	156	8	12	136	108	0.0582617	1	3.17028
MMP16	16	15	2	2	11	11	0.0585867	1	0
SGCZ	16	15	2	0	13	15	0.0585867	1	-1.04253
THAP6	79	53	18	25	10	9	0.0591468	1	0.646333
SRCRB4D	32	25	5	3	17	18	0.0627846	1	-0.45513
APOOL	24	20	6	6	8	6	0.0630168	1	1.50218
FADS1	24	20	1	1	18	12	0.0630168	1	3.01632
HOMER1	24	20	5	2	13	12	0.0630168	1	0.556387
PGPEP1	24	20	7	11	2	1	0.0630168	1	1.04811
DENND5B	37	28	11	10	7	4	0.0639091	1	2.50133
SLIT3	200	120	0	0	120	77	0.0639871	1	5.79775
ARHGEF19	9	10	1	2	7	3	0.0644875	1	3.46574
CARHSP1	9	10	2	5	3	4	0.0644875	1	-0.96441
CREBZF	9	10	1	9	0	0	0.0644875	1	0
IMPDH1	9	10	3	1	6	5	0.0644875	1	0.831229
KLF13	9	10	0	1	9	11	0.0644875	1	-1.25928
NT5M	9	10	0	1	9	3	0.0644875	1	4.87643
POR	9	10	0	1	9	4	0.0644875	1	3.91202
ANKFY1	21	18	2	2	14	12	0.0652061	1	1.08862
ZMYM4	21	18	1	2	15	8	0.0652061	1	4.12532
C12orf61	29	23	13	10	0	0	0.0659645	1	0
APLN	5	7	1	0	6	5	0.0662179	1	0.831229
BEST4	5	7	1	1	5	1	0.0662179	1	3.93848
C14orf149	5	7	1	0	6	1	0.0662179	1	4.76971
CHADL	5	7	1	2	4	0	0.0662179	1	3.737
CKAP4	5	7	3	0	4	1	0.0662179	1	3.04385
EPM2AIP1	5	7	4	3	0	0	0.0662179	1	0
EXO1	5	7	4	1	2	1	0.0662179	1	1.04811
FBXO11	5	7	0	0	7	2	0.0662179	1	4.49707
FLJ10038	5	7	4	3	0	0	0.0662179	1	0
FMNL2	5	7	1	0	6	7	0.0662179	1	-0.775464
GGA3	5	7	1	1	5	4	0.0662179	1	0.894632
GPX1	5	7	6	1	0	0	0.0662179	1	0
NR2F1	5	7	2	4	1	2	0.0662179	1	-1.04811
PDCD7	5	7	2	2	3	2	0.0662179	1	1.03133
PRMT6	5	7	5	2	0	0	0.0662179	1	0
RAD51AP1	5	7	0	0	7	2	0.0662179	1	4.49707
RBM12B	5	7	0	1	6	7	0.0662179	1	-0.775464
SFRS12IP1	5	7	1	1	5	5	0.0662179	1	0
TBX2	5	7	2	3	2	1	0.0662179	1	1.04811
TERT	5	7	3	1	3	0	0.0662179	1	2.77259
ZYG11B	5	7	0	0	7	3	0.0662179	1	3.46574
CNTN3	18	16	5	4	7	9	0.0669181	1	-1.4107
RP1-177G6.2	18	16	3	2	11	11	0.0669181	1	0
C20orf72	73	49	10	9	30	28	0.0670473	1	0.654388
CRLF1	12	12	3	3	6	6	0.0673373	1	0
FUT9	12	12	0	0	12	4	0.0673373	1	5.75444
NLN	12	12	1	0	11	8	0.0673373	1	1.94326
SRRD	12	12	0	1	11	4	0.0673373	1	5.1713
TPI1P2	12	12	6	6	0	0	0.0673373	1	0
USP40	12	12	1	1	10	20	0.0673373	1	-5.07715
WDR90	12	12	7	1	4	5	0.0673373	1	-0.894632
C19orf54	34	26	11	11	4	8	0.0675197	1	-3.22804
FAM96A	34	26	2	3	21	22	0.0675197	1	-0.39931
LRRC14	15	14	7	6	1	0	0.0678163	1	0.693147
TNFRSF11A	112	71	12	5	54	45	0.0685466	1	2.0201
C6orf10	26	21	0	0	21	14	0.069127	1	3.20424
PABPN1	26	21	8	8	5	8	0.069127	1	-2.33341
RILPL1	26	21	0	2	19	12	0.069127	1	3.4559
COMMD1	36	27	1	0	26	12	0.0721635	1	6.17989
IQCG	23	19	2	1	16	10	0.0721787	1	3.2853
RUNX1T1	23	19	0	0	19	13	0.0721787	1	2.89951
NCRNA00188	65	44	11	17	16	28	0.0734734	1	-4.7776
SEPT9	86	56	8	12	36	32	0.073543	1	1.17315
KLF7	53	37	2	5	30	34	0.0740268	1	-1.22374
MRPL34	20	17	12	4	1	0	0.0749706	1	0.693147
SATB1	20	17	2	2	13	6	0.0749706	1	4.58497
WNK3	20	17	4	10	3	3	0.0749706	1	0
PRR5-ARHGAP8	28	22	0	0	22	18	0.0750802	1	1.67584
UHRF1	28	22	6	6	10	7	0.0750802	1	2.05703
AGXT2L2	8	9	0	0	9	7	0.0751775	1	1.4107
ALDH16A1	8	9	0	1	8	10	0.0751775	1	-1.33032
C6orf47	8	9	5	4	0	0	0.0751775	1	0
CLEC11A	8	9	1	7	1	4	0.0751775	1	-3.04385
FANCG	8	9	1	1	7	2	0.0751775	1	4.49707
FOSL1	8	9	0	0	9	13	0.0751775	1	-2.39881
IPO7	8	9	0	1	8	2	0.0751775	1	5.22378
LPXN	8	9	1	0	8	8	0.0751775	1	0
MESDC2	8	9	2	0	7	3	0.0751775	1	3.46574
PDPK1	8	9	4	5	0	1	0.0751775	1	-0.693147
PRKAB2	8	9	0	1	8	6	0.0751775	1	1.50218
SHISA3	8	9	3	3	3	3	0.0751775	1	0
TRA2A	8	9	2	3	4	4	0.0751775	1	0
VILL	8	9	2	2	5	4	0.0751775	1	0.894632
MSH5	48	34	9	8	17	15	0.0753263	1	0.962279
MSI2	104	66	4	4	58	60	0.0756654	1	-0.393816
UBE2V1	43	31	3	4	24	18	0.076272	1	2.44023
CLDN20	4	6	0	0	6	1	0.076328	1	4.76971
COX8A	4	6	0	1	5	1	0.076328	1	3.93848
DLG4	4	6	1	2	3	3	0.076328	1	0
DNAJC5G	4	6	3	2	1	0	0.076328	1	0.693147
LENG8	4	6	0	2	4	1	0.076328	1	3.04385
LOC550112	4	6	0	0	6	4	0.076328	1	1.72586
MOGS	4	6	2	2	2	0	0.076328	1	1.74126
NBEAL1	4	6	0	1	5	3	0.076328	1	1.85904
PEX11G	4	6	0	0	6	2	0.076328	1	3.7216
PRRC1	4	6	0	2	4	2	0.076328	1	1.99574
QTRTD1	4	6	0	0	6	1	0.076328	1	4.76971
RAB39B	4	6	0	1	5	6	0.076328	1	-0.831229
RAE1	4	6	1	3	2	0	0.076328	1	1.74126
RRBP1	4	6	0	0	6	2	0.076328	1	3.7216
SFPQ	4	6	3	3	0	0	0.076328	1	0
SHE	4	6	1	5	0	0	0.076328	1	0
SLC16A14	4	6	0	1	5	3	0.076328	1	1.85904
SLC27A3	4	6	1	5	0	0	0.076328	1	0
SLC39A8	4	6	2	2	2	0	0.076328	1	1.74126
SMO	4	6	1	2	3	1	0.076328	1	2.07944
TRIM45	4	6	2	4	0	0	0.076328	1	0
TULP2	4	6	2	0	4	2	0.076328	1	1.99574
WDYHV1	4	6	0	0	6	8	0.076328	1	-1.50218
WRNIP1	4	6	1	1	4	1	0.076328	1	3.04385
BTBD1	17	15	2	3	10	10	0.0772603	1	0
C3orf63	17	15	2	1	12	10	0.0772603	1	1.19609
MYH9	17	15	0	0	15	4	0.0772603	1	7.35336
ARID4A	11	11	0	0	11	4	0.0783952	1	5.1713
ATP5S	11	11	2	1	8	2	0.0783952	1	5.22378
DCI	11	11	0	0	11	4	0.0783952	1	5.1713
DLX1	11	11	5	2	4	6	0.0783952	1	-1.72586
DYNC1LI1	11	11	1	0	10	5	0.0783952	1	3.66372
LOC113230	11	11	4	1	6	2	0.0783952	1	3.7216
LONRF2	11	11	6	3	2	0	0.0783952	1	1.74126
PCDH18	11	11	3	6	2	0	0.0783952	1	1.74126
SYNPO	11	11	4	4	3	6	0.0783952	1	-2.69027
TMEM30A	11	11	1	1	9	9	0.0783952	1	0
C8orf51	14	13	5	8	0	0	0.0786407	1	0
JMY	14	13	3	3	7	10	0.0786407	1	-2.05703
WDR66	14	13	1	2	10	9	0.0786407	1	0.646333
CDKN2BAS	25	20	0	1	19	7	0.0789356	1	6.70901
FGGY	25	20	0	0	20	11	0.0789356	1	4.46421
PRMT7	25	20	1	1	18	13	0.0789356	1	2.45994
SATB2	25	20	0	3	17	17	0.0789356	1	0
TFAP2A	25	20	2	1	17	12	0.0789356	1	2.56119
TNFRSF19	25	20	5	7	8	10	0.0789356	1	-1.33032
ACER3	45	32	3	4	25	16	0.0802402	1	3.73383
ATF7	30	23	0	1	22	18	0.0808686	1	1.67584
KATNAL1	30	23	1	0	22	17	0.0808686	1	2.13097
LRRC27	87	56	8	8	40	33	0.0826775	1	1.95543
IFT88	22	18	2	2	14	9	0.0827233	1	2.93103
NME1	22	18	5	5	8	11	0.0827233	1	-1.94326
SESTD1	47	33	3	2	28	14	0.0841294	1	5.7782
BMF	143	87	19	27	41	41	0.0843617	1	0
METTL8	27	21	0	2	19	20	0.085469	1	-0.425169
B3GNT1	19	16	7	8	1	0	0.0862799	1	0.693147
SFXN2	19	16	0	0	16	9	0.0862799	1	3.93163
SGMS1	19	16	0	0	16	9	0.0862799	1	3.93163
ZMYM3	19	16	8	4	4	5	0.0862799	1	-0.894632
STAT6	32	24	4	12	8	6	0.0864884	1	1.50218
TFDP2	32	24	1	0	23	16	0.0864884	1	2.9906
ADAMTS10	3	5	0	0	5	2	0.0877078	1	2.89037
C12orf48	3	5	1	0	4	4	0.0877078	1	0
C19orf61	3	5	1	0	4	3	0.0877078	1	0.96441
DNAH2	3	5	1	0	4	6	0.0877078	1	-1.72586
DOM3Z	3	5	2	0	3	0	0.0877078	1	2.77259
ERMAP	3	5	0	0	5	3	0.0877078	1	1.85904
GDE1	3	5	1	1	3	1	0.0877078	1	2.07944
GUCY1A2	3	5	0	0	5	3	0.0877078	1	1.85904
HEXA	3	5	2	0	3	4	0.0877078	1	-0.96441
HGSNAT	3	5	0	0	5	6	0.0877078	1	-0.831229
HM13	3	5	0	0	5	1	0.0877078	1	3.93848
IER3	3	5	1	3	1	0	0.0877078	1	0.693147
KIAA1826	3	5	2	2	1	2	0.0877078	1	-1.04811
KIF3C	3	5	1	1	3	0	0.0877078	1	2.77259
KLHL9	3	5	3	2	0	0	0.0877078	1	0
LIMD2	3	5	1	2	2	1	0.0877078	1	1.04811
LPAR6	3	5	3	2	0	1	0.0877078	1	-0.693147
MEOX2	3	5	1	1	3	0	0.0877078	1	2.77259
MOBKL1B	3	5	0	0	5	2	0.0877078	1	2.89037
MREG	3	5	1	0	4	0	0.0877078	1	3.737
NAA20	3	5	1	0	4	3	0.0877078	1	0.96441
NHLRC4	3	5	3	2	0	0	0.0877078	1	0
NUP210L	3	5	0	0	5	3	0.0877078	1	1.85904
OST4	3	5	1	1	3	0	0.0877078	1	2.77259
PDE10A	3	5	1	1	3	0	0.0877078	1	2.77259
PHF2	3	5	0	1	4	0	0.0877078	1	3.737
PIK3IP1	3	5	1	1	3	0	0.0877078	1	2.77259
PNMA2	3	5	0	0	5	4	0.0877078	1	0.894632
PRUNE2	3	5	0	0	5	1	0.0877078	1	3.93848
PSMA7	3	5	0	0	5	1	0.0877078	1	3.93848
SH2B1	3	5	3	2	0	0	0.0877078	1	0
SLC12A9	3	5	1	3	1	1	0.0877078	1	0
ST3GAL1	3	5	0	0	5	1	0.0877078	1	3.93848
TMEM41B	3	5	0	1	4	1	0.0877078	1	3.04385
TMEM67	3	5	0	1	4	5	0.0877078	1	-0.894632
TTYH3	3	5	1	0	4	1	0.0877078	1	3.04385
UCKL1AS	3	5	3	2	0	0	0.0877078	1	0
YTHDC2	3	5	0	1	4	5	0.0877078	1	-0.894632
ZNF260	3	5	0	0	5	2	0.0877078	1	2.89037
ADAM17	7	8	0	1	7	4	0.0879155	1	2.50133
ARNT2	7	8	0	0	8	1	0.0879155	1	6.27189
B4GALT2	7	8	1	1	6	6	0.0879155	1	0
C1orf84	7	8	0	0	8	7	0.0879155	1	0.726712
CIB2	7	8	1	0	7	0	0.0879155	1	6.23832
GBAS	7	8	0	0	8	3	0.0879155	1	4.19245
GPM6B	7	8	1	1	6	6	0.0879155	1	0
HSPA4	7	8	0	1	7	1	0.0879155	1	5.54518
ITFG2	7	8	0	0	8	4	0.0879155	1	3.22804
ITGB1BP1	7	8	0	0	8	5	0.0879155	1	2.33341
LIN7B	7	8	1	2	5	1	0.0879155	1	3.93848
LSM1	7	8	0	1	7	3	0.0879155	1	3.46574
MBD6	7	8	0	1	7	2	0.0879155	1	4.49707
MYEF2	7	8	3	2	3	3	0.0879155	1	0
PARP3	7	8	2	2	4	1	0.0879155	1	3.04385
RAB6A	7	8	0	0	8	6	0.0879155	1	1.50218
RBM15B	7	8	6	2	0	0	0.0879155	1	0
RNF138	7	8	3	1	4	2	0.0879155	1	1.99574
SERAC1	7	8	0	0	8	2	0.0879155	1	5.22378
SERTAD1	7	8	1	0	7	2	0.0879155	1	4.49707
SIX3	7	8	6	1	1	1	0.0879155	1	0
SLC25A12	7	8	0	0	8	6	0.0879155	1	1.50218
SPPL2B	7	8	0	0	8	3	0.0879155	1	4.19245
TMEM216	7	8	2	4	2	2	0.0879155	1	0
TRMU	7	8	1	0	7	9	0.0879155	1	-1.4107
UBE2CBP	7	8	0	0	8	1	0.0879155	1	6.27189
WDR35	7	8	2	1	5	6	0.0879155	1	-0.831229
ZNF323	7	8	1	1	6	4	0.0879155	1	1.72586
EYS	160	96	1	0	95	76	0.0885165	1	2.83436
C11orf20	16	14	8	2	4	1	0.0893282	1	3.04385
GTF2A2	16	14	1	1	12	6	0.0893282	1	4.02858
HSBP1L1	16	14	0	0	14	8	0.0893282	1	3.61502
HSPA4L	16	14	2	0	12	13	0.0893282	1	-0.556387
MPI	16	14	0	3	11	5	0.0893282	1	4.27667
PIP5K1B	16	14	0	0	14	12	0.0893282	1	1.08862
TBC1D2B	16	14	1	1	12	8	0.0893282	1	2.5264
C17orf76	13	12	5	4	3	4	0.0913795	1	-0.96441
GABPB2	13	12	3	2	7	6	0.0913795	1	0.775464
MOB2	13	12	0	0	12	11	0.0913795	1	0.583143
RAPGEF5	13	12	0	0	12	12	0.0913795	1	0
RNF214	13	12	0	1	11	10	0.0913795	1	0.612942
RFX3	79	51	0	1	50	36	0.0914523	1	3.49208
ADAR	10	10	0	0	10	10	0.0915233	1	0
ARL8B	10	10	0	0	10	2	0.0915233	1	6.5541
CD200R1	10	10	0	0	10	4	0.0915233	1	4.55836
CNST	10	10	1	2	7	9	0.0915233	1	-1.4107
LIF	10	10	0	2	8	3	0.0915233	1	4.19245
LMTK3	10	10	0	0	10	7	0.0915233	1	2.05703
MEGF8	10	10	4	3	3	4	0.0915233	1	-0.96441
MEX3A	10	10	2	5	3	5	0.0915233	1	-1.85904
MMAA	10	10	0	0	10	7	0.0915233	1	2.05703
NHLH2	10	10	0	4	6	2	0.0915233	1	3.7216
PCGF6	10	10	1	0	9	3	0.0915233	1	4.87643
TAB2	10	10	0	0	10	2	0.0915233	1	6.5541
USP7	10	10	1	0	9	7	0.0915233	1	1.4107
EML2	29	22	5	2	15	15	0.091777	1	0
PCDHAC2	58	39	0	2	37	32	0.092546	1	1.45203
KSR1	81	52	0	0	52	37	0.0938816	1	3.65173
MRM1	21	17	3	7	7	9	0.0948702	1	-1.4107
C4orf34	41	29	0	0	29	21	0.0958134	1	2.90501
NEIL1	41	29	6	9	14	17	0.0958134	1	-1.47258
OSBPL6	36	26	0	0	26	18	0.0972222	1	3.16357
SEPHS1	36	26	0	0	26	15	0.0972222	1	4.58098
C12orf47	26	20	9	8	3	9	0.0973095	1	-4.87643
PHF8	26	20	8	5	7	7	0.0973095	1	0
SH3BP2	76	49	25	20	4	9	0.0975398	1	-3.91202
CNTN5	18	15	0	0	15	9	0.0993993	1	3.44133
COLEC11	18	15	0	0	15	9	0.0993993	1	3.44133
FLJ39534	18	15	0	0	15	8	0.0993993	1	4.12532
IRAK1	18	15	5	3	7	5	0.0993993	1	1.60669
PTAR1	18	15	0	0	15	7	0.0993993	1	4.85203
SLC37A3	18	15	1	1	13	8	0.0993993	1	3.08279
ABCF2	2	4	0	1	3	1	0.0999089	1	2.07944
ACADVL	2	4	2	1	1	2	0.0999089	1	-1.04811
ADAMTSL4	2	4	2	2	0	1	0.0999089	1	-0.693147
ANAPC16	2	4	0	0	4	4	0.0999089	1	0
C14orf119	2	4	0	0	4	1	0.0999089	1	3.04385
C1orf123	2	4	0	0	4	4	0.0999089	1	0
C7orf11	2	4	1	0	3	0	0.0999089	1	2.77259
C9orf6	2	4	1	0	3	0	0.0999089	1	2.77259
CCDC3	2	4	0	0	4	1	0.0999089	1	3.04385
CEP290	2	4	1	0	3	1	0.0999089	1	2.07944
CLTB	2	4	0	0	4	2	0.0999089	1	1.99574
COL6A1	2	4	1	1	2	0	0.0999089	1	1.74126
COX19	2	4	0	1	3	1	0.0999089	1	2.07944
CYB561	2	4	1	0	3	2	0.0999089	1	1.03133
DIP2A	2	4	0	0	4	1	0.0999089	1	3.04385
DPM1	2	4	0	0	4	3	0.0999089	1	0.96441
ELL3	2	4	2	1	1	2	0.0999089	1	-1.04811
ENO2	2	4	0	0	4	1	0.0999089	1	3.04385
FLJ45983	2	4	3	1	0	0	0.0999089	1	0
FOSB	2	4	2	1	1	2	0.0999089	1	-1.04811
GHDC	2	4	2	0	2	2	0.0999089	1	0
GOT1	2	4	0	1	3	1	0.0999089	1	2.07944
HIC2	2	4	2	2	0	1	0.0999089	1	-0.693147
HTR4	2	4	1	0	3	0	0.0999089	1	2.77259
KRTCAP2	2	4	1	1	2	1	0.0999089	1	1.04811
KYNU	2	4	0	0	4	4	0.0999089	1	0
MARK1	2	4	0	0	4	3	0.0999089	1	0.96441
MARK2	2	4	1	0	3	4	0.0999089	1	-0.96441
MATN2	2	4	1	0	3	3	0.0999089	1	0
MTM1	2	4	0	0	4	0	0.0999089	1	3.737
NPW	2	4	2	2	0	0	0.0999089	1	0
OPRM1	2	4	1	0	3	1	0.0999089	1	2.07944
PBXIP1	2	4	1	0	3	0	0.0999089	1	2.77259
PIGX	2	4	0	0	4	2	0.0999089	1	1.99574
PURA	2	4	1	3	0	0	0.0999089	1	0
RAB27B	2	4	0	1	3	2	0.0999089	1	1.03133
RBM17	2	4	2	0	2	1	0.0999089	1	1.04811
RDH14	2	4	1	0	3	0	0.0999089	1	2.77259
REEP4	2	4	2	1	1	0	0.0999089	1	0.693147
RGS19	2	4	1	0	3	0	0.0999089	1	2.77259
RINL	2	4	1	3	0	0	0.0999089	1	0
RNF113A	2	4	1	3	0	0	0.0999089	1	0
RTBDN	2	4	1	0	3	2	0.0999089	1	1.03133
SAC3D1	2	4	0	1	3	0	0.0999089	1	2.77259
SCAMP2	2	4	1	1	2	4	0.0999089	1	-1.99574
SCYL1	2	4	0	3	1	0	0.0999089	1	0.693147
SLC17A5	2	4	0	0	4	1	0.0999089	1	3.04385
SMARCD1	2	4	1	0	3	1	0.0999089	1	2.07944
STAM2	2	4	0	1	3	2	0.0999089	1	1.03133
STOM	2	4	0	0	4	1	0.0999089	1	3.04385
STX2	2	4	1	0	3	3	0.0999089	1	0
STX6	2	4	3	0	1	0	0.0999089	1	0.693147
SUMF2	2	4	1	0	3	5	0.0999089	1	-1.85904
TAP1	2	4	2	2	0	0	0.0999089	1	0
TNFRSF10D	2	4	0	3	1	4	0.0999089	1	-3.04385
TROAP	2	4	2	0	2	1	0.0999089	1	1.04811
UBOX5	2	4	0	1	3	3	0.0999089	1	0
VIPR2	2	4	2	0	2	2	0.0999089	1	0
VPS26A	2	4	0	1	3	3	0.0999089	1	0
VWF	2	4	0	0	4	4	0.0999089	1	0
YIF1A	2	4	0	1	3	3	0.0999089	1	0
ZBTB3	2	4	1	2	1	0	0.0999089	1	0.693147
ZHX3	2	4	0	0	4	1	0.0999089	1	3.04385
ZNF224	2	4	0	0	4	1	0.0999089	1	3.04385
FAM122C	43	30	1	3	26	28	0.100341	1	-0.686926
SREBF1	38	27	0	2	25	8	0.102341	1	8.34945
AASS	6	7	0	0	7	3	0.103207	1	3.46574
ARMC4	6	7	0	1	6	1	0.103207	1	4.76971
ATG4A	6	7	0	0	7	5	0.103207	1	1.60669
C4orf38	6	7	3	4	0	0	0.103207	1	0
C5orf54	6	7	3	1	3	5	0.103207	1	-1.85904
C5orf62	6	7	2	3	2	0	0.103207	1	1.74126
CCDC40	6	7	3	0	4	4	0.103207	1	0
CNOT10	6	7	0	1	6	2	0.103207	1	3.7216
COMMD3	6	7	2	1	4	3	0.103207	1	0.96441
CXorf58	6	7	0	0	7	6	0.103207	1	0.775464
DAPK1	6	7	2	0	5	8	0.103207	1	-2.33341
DDX39	6	7	0	0	7	11	0.103207	1	-2.66997
DLX3	6	7	0	0	7	3	0.103207	1	3.46574
DOCK5	6	7	0	0	7	4	0.103207	1	2.50133
FBXO21	6	7	1	1	5	5	0.103207	1	0
FKBPL	6	7	3	1	3	0	0.103207	1	2.77259
GAPVD1	6	7	1	0	6	7	0.103207	1	-0.775464
HPRT1	6	7	0	0	7	4	0.103207	1	2.50133
HRSP12	6	7	0	0	7	2	0.103207	1	4.49707
ICAM3	6	7	1	4	2	0	0.103207	1	1.74126
IER5L	6	7	4	3	0	0	0.103207	1	0
KCNIP1	6	7	1	0	6	4	0.103207	1	1.72586
LOC100133669	6	7	0	0	7	4	0.103207	1	2.50133
METTL10	6	7	1	3	3	4	0.103207	1	-0.96441
METTL11A	6	7	0	0	7	5	0.103207	1	1.60669
MFI2	6	7	0	0	7	3	0.103207	1	3.46574
MFSD6	6	7	0	0	7	4	0.103207	1	2.50133
MTR	6	7	0	1	6	4	0.103207	1	1.72586
PRKRIR	6	7	0	0	7	3	0.103207	1	3.46574
PTBP1	6	7	0	0	7	2	0.103207	1	4.49707
PTPDC1	6	7	1	0	6	1	0.103207	1	4.76971
REXO4	6	7	0	0	7	8	0.103207	1	-0.726712
SRF	6	7	2	2	3	5	0.103207	1	-1.85904
TMEM5	6	7	0	0	7	3	0.103207	1	3.46574
TP73	6	7	0	0	7	3	0.103207	1	3.46574
PTPRG	138	83	1	2	80	71	0.103241	1	1.47344
BLMH	15	13	2	1	10	3	0.103446	1	5.52277
KISS1R	15	13	1	7	5	5	0.103446	1	0
LOC402377	15	13	6	4	3	5	0.103446	1	-1.85904
PRKD2	15	13	2	2	9	7	0.103446	1	1.4107
RSU1	15	13	1	7	5	8	0.103446	1	-2.33341
YEATS2	15	13	0	1	12	10	0.103446	1	1.19609
MAGI1	28	21	2	2	17	14	0.104152	1	1.47258
PLA2G6	28	21	1	2	18	25	0.104152	1	-2.80672
TSR1	52	35	20	12	3	11	0.105756	1	-6.13571
AGGF1	12	11	0	2	9	3	0.106432	1	4.87643
CAND1	12	11	2	0	9	4	0.106432	1	3.91202
CHCHD10	12	11	1	0	10	3	0.106432	1	5.52277
CRLS1	12	11	5	2	4	7	0.106432	1	-2.50133
FLNC	12	11	3	5	3	6	0.106432	1	-2.69027
MBLAC1	12	11	6	5	0	2	0.106432	1	-1.74126
SERBP1	12	11	1	0	10	9	0.106432	1	0.646333
SKP2	12	11	1	2	8	9	0.106432	1	-0.683985
TCTN1	12	11	0	1	10	6	0.106432	1	2.83249
THOP1	12	11	0	1	10	5	0.106432	1	3.66372
ZBED5	12	11	1	1	9	5	0.106432	1	3.01739
ZNF589	12	11	0	0	11	3	0.106432	1	6.13571
ABHD2	9	9	2	2	5	2	0.107204	1	2.89037
APITD1	9	9	4	3	2	5	0.107204	1	-2.89037
ARL6IP4	9	9	4	2	3	5	0.107204	1	-1.85904
C1orf56	9	9	2	5	2	0	0.107204	1	1.74126
COL13A1	9	9	0	1	8	4	0.107204	1	3.22804
CUL4A	9	9	0	2	7	6	0.107204	1	0.775464
DPP8	9	9	1	0	8	7	0.107204	1	0.726712
FAM169A	9	9	0	1	8	2	0.107204	1	5.22378
FRAT1	9	9	4	5	0	0	0.107204	1	0
LNP1	9	9	0	4	5	0	0.107204	1	4.63163
LOC400752	9	9	4	5	0	0	0.107204	1	0
MTRF1	9	9	2	2	5	3	0.107204	1	1.85904
NGFRAP1	9	9	3	4	2	1	0.107204	1	1.04811
NOTCH4	9	9	4	1	4	0	0.107204	1	3.737
PTCH2	9	9	5	3	1	1	0.107204	1	0
SEPT10	9	9	0	0	9	7	0.107204	1	1.4107
STOX1	9	9	0	0	9	3	0.107204	1	4.87643
TAF6	9	9	3	3	3	2	0.107204	1	1.03133
TIRAP	9	9	0	0	9	5	0.107204	1	3.01739
WNK2	9	9	0	0	9	5	0.107204	1	3.01739
CUL1	20	16	0	0	16	13	0.108876	1	1.53283
ATAD1	61	40	2	2	36	24	0.109155	1	3.86291
RHBDD3	35	25	5	9	11	18	0.109382	1	-3.59947
SCFD2	35	25	1	2	22	32	0.109382	1	-3.45416
C17orf91	25	19	5	4	10	9	0.110805	1	0.646333
HDDC3	25	19	6	8	5	5	0.110805	1	0
ZNF668	25	19	7	9	3	5	0.110805	1	-1.85904
ADAM15	1	3	2	0	1	0	0.110905	1	0.693147
ANKS6	1	3	1	0	2	1	0.110905	1	1.04811
ASB13	1	3	0	0	3	2	0.110905	1	1.03133
ASCC2	1	3	0	0	3	3	0.110905	1	0
ASTN1	1	3	0	0	3	1	0.110905	1	2.07944
ATG4B	1	3	0	0	3	1	0.110905	1	2.07944
ATXN7L3	1	3	0	2	1	0	0.110905	1	0.693147
BHLHE22	1	3	1	2	0	0	0.110905	1	0
C2orf55	1	3	1	0	2	0	0.110905	1	1.74126
C9orf140	1	3	0	1	2	0	0.110905	1	1.74126
CCNG1	1	3	1	2	0	2	0.110905	1	-1.74126
CDH19	1	3	0	0	3	0	0.110905	1	2.77259
CDK16	1	3	0	3	0	0	0.110905	1	0
CDK5R1	1	3	1	2	0	0	0.110905	1	0
CMAS	1	3	1	0	2	0	0.110905	1	1.74126
CPLX2	1	3	0	0	3	0	0.110905	1	2.77259
CRTC2	1	3	0	0	3	2	0.110905	1	1.03133
DAPK3	1	3	0	0	3	0	0.110905	1	2.77259
DFNB31	1	3	0	1	2	2	0.110905	1	0
EFCAB7	1	3	0	0	3	2	0.110905	1	1.03133
EIF1B	1	3	0	1	2	0	0.110905	1	1.74126
EXTL2	1	3	0	0	3	4	0.110905	1	-0.96441
FAM109A	1	3	0	0	3	1	0.110905	1	2.07944
FAM111B	1	3	0	0	3	1	0.110905	1	2.07944
FAM160B1	1	3	0	1	2	0	0.110905	1	1.74126
GNB5	1	3	0	0	3	0	0.110905	1	2.77259
GPR172B	1	3	3	0	0	0	0.110905	1	0
HAGH	1	3	0	0	3	0	0.110905	1	2.77259
HCN3	1	3	1	2	0	0	0.110905	1	0
HEATR7A	1	3	0	0	3	1	0.110905	1	2.07944
HECW2	1	3	0	0	3	1	0.110905	1	2.07944
HOXD8	1	3	0	2	1	0	0.110905	1	0.693147
IFNGR1	1	3	0	0	3	0	0.110905	1	2.77259
IL13RA1	1	3	0	0	3	2	0.110905	1	1.03133
JHDM1D	1	3	1	1	1	3	0.110905	1	-2.07944
KIAA0284	1	3	1	1	1	1	0.110905	1	0
KIAA0319	1	3	2	1	0	0	0.110905	1	0
KIF6	1	3	0	0	3	1	0.110905	1	2.07944
KLHL29	1	3	0	0	3	1	0.110905	1	2.07944
KTI12	1	3	0	3	0	0	0.110905	1	0
LLPH	1	3	0	0	3	1	0.110905	1	2.07944
LOC253039	1	3	1	1	1	0	0.110905	1	0.693147
LOC283392	1	3	2	1	0	3	0.110905	1	-2.77259
LOC283731	1	3	0	3	0	2	0.110905	1	-1.74126
LOC285692	1	3	0	0	3	1	0.110905	1	2.07944
LTC4S	1	3	1	1	1	0	0.110905	1	0.693147
MAP1LC3B	1	3	1	0	2	0	0.110905	1	1.74126
MAPK7	1	3	0	1	2	0	0.110905	1	1.74126
NUDT15	1	3	1	1	1	0	0.110905	1	0.693147
PAPSS1	1	3	0	0	3	0	0.110905	1	2.77259
PRKACA	1	3	0	0	3	0	0.110905	1	2.77259
PYROXD2	1	3	0	0	3	1	0.110905	1	2.07944
RAB11FIP1	1	3	0	2	1	1	0.110905	1	0
RAP2B	1	3	3	0	0	0	0.110905	1	0
RCE1	1	3	1	0	2	0	0.110905	1	1.74126
RHOU	1	3	0	0	3	1	0.110905	1	2.07944
SDHAF1	1	3	1	2	0	0	0.110905	1	0
SIX1	1	3	1	1	1	1	0.110905	1	0
SLC12A7	1	3	0	1	2	0	0.110905	1	1.74126
SLC19A2	1	3	0	0	3	1	0.110905	1	2.07944
SMTNL2	1	3	1	1	1	1	0.110905	1	0
SRL	1	3	0	1	2	0	0.110905	1	1.74126
STMN2	1	3	0	0	3	1	0.110905	1	2.07944
SUB1	1	3	0	0	3	2	0.110905	1	1.03133
SUCLA2	1	3	0	0	3	0	0.110905	1	2.77259
SUCLG1	1	3	0	0	3	2	0.110905	1	1.03133
SYT17	1	3	0	0	3	0	0.110905	1	2.77259
TBC1D20	1	3	1	1	1	2	0.110905	1	-1.04811
TCF7	1	3	0	0	3	2	0.110905	1	1.03133
TCOF1	1	3	0	0	3	7	0.110905	1	-3.46574
TDRD1	1	3	0	0	3	1	0.110905	1	2.07944
TEKT2	1	3	2	1	0	1	0.110905	1	-0.693147
TMEM39A	1	3	0	0	3	0	0.110905	1	2.77259
TOM1	1	3	0	0	3	0	0.110905	1	2.77259
TRIM32	1	3	0	0	3	1	0.110905	1	2.07944
TTC26	1	3	1	0	2	1	0.110905	1	1.04811
VEGFB	1	3	2	1	0	2	0.110905	1	-1.74126
VMAC	1	3	1	0	2	0	0.110905	1	1.74126
VPS33B	1	3	0	0	3	0	0.110905	1	2.77259
WBP1	1	3	0	0	3	1	0.110905	1	2.07944
WDR11	1	3	1	1	1	2	0.110905	1	-1.04811
WDR19	1	3	0	0	3	3	0.110905	1	0
ZC4H2	1	3	0	0	3	1	0.110905	1	2.07944
ZDHHC20	1	3	0	0	3	1	0.110905	1	2.07944
ZKSCAN4	1	3	1	1	1	2	0.110905	1	-1.04811
ZSCAN23	1	3	2	0	1	2	0.110905	1	-1.04811
ADCY5	0	2	0	0	2	0	0.110956	1	1.74126
AIFM3	0	2	2	0	0	0	0.110956	1	0
AKAP2	0	2	0	0	2	2	0.110956	1	0
AMMECR1L	0	2	0	1	1	0	0.110956	1	0.693147
ANKZF1	0	2	1	0	1	3	0.110956	1	-2.07944
APOC4	0	2	1	0	1	0	0.110956	1	0.693147
APOL6	0	2	1	1	0	0	0.110956	1	0
ARHGEF33	0	2	0	0	2	0	0.110956	1	1.74126
ARMCX3	0	2	0	0	2	0	0.110956	1	1.74126
ATP13A3	0	2	1	0	1	0	0.110956	1	0.693147
ATP13A4	0	2	0	0	2	0	0.110956	1	1.74126
BBOX1	0	2	0	0	2	0	0.110956	1	1.74126
BDNF	0	2	0	1	1	0	0.110956	1	0.693147
BMP2	0	2	1	1	0	1	0.110956	1	-0.693147
BMP5	0	2	0	0	2	0	0.110956	1	1.74126
BTG1	0	2	0	1	1	0	0.110956	1	0.693147
C10orf67	0	2	1	0	1	1	0.110956	1	0
C14orf79	0	2	1	1	0	0	0.110956	1	0
C17orf60	0	2	1	0	1	0	0.110956	1	0.693147
C18orf45	0	2	0	0	2	1	0.110956	1	1.04811
C19orf28	0	2	0	0	2	0	0.110956	1	1.74126
C1orf52	0	2	1	0	1	0	0.110956	1	0.693147
C1QTNF2	0	2	0	1	1	0	0.110956	1	0.693147
C22orf45	0	2	0	0	2	0	0.110956	1	1.74126
CA13	0	2	1	1	0	3	0.110956	1	-2.77259
CCDC127	0	2	0	0	2	0	0.110956	1	1.74126
CCDC150	0	2	0	0	2	0	0.110956	1	1.74126
CCDC27	0	2	0	2	0	0	0.110956	1	0
CCDC28A	0	2	0	1	1	0	0.110956	1	0.693147
CHIA	0	2	0	2	0	1	0.110956	1	-0.693147
CHPF2	0	2	1	1	0	0	0.110956	1	0
CPN1	0	2	0	0	2	0	0.110956	1	1.74126
CRHR1	0	2	0	0	2	0	0.110956	1	1.74126
CRIPT	0	2	0	0	2	0	0.110956	1	1.74126
CST8	0	2	0	0	2	1	0.110956	1	1.04811
CYB561D1	0	2	0	1	1	0	0.110956	1	0.693147
CYB5RL	0	2	0	0	2	1	0.110956	1	1.04811
CYP24A1	0	2	0	0	2	0	0.110956	1	1.74126
EME2	0	2	1	0	1	0	0.110956	1	0.693147
EMR1	0	2	0	0	2	1	0.110956	1	1.04811
EPHB6	0	2	0	0	2	0	0.110956	1	1.74126
ETV4	0	2	0	0	2	2	0.110956	1	0
FAM127B	0	2	0	2	0	0	0.110956	1	0
FAM160B2	0	2	0	0	2	2	0.110956	1	0
FH	0	2	0	0	2	2	0.110956	1	0
FSD2	0	2	0	0	2	0	0.110956	1	1.74126
FYB	0	2	0	0	2	0	0.110956	1	1.74126
GALNT9	0	2	1	1	0	1	0.110956	1	-0.693147
GIPC1	0	2	0	0	2	1	0.110956	1	1.04811
GJD3	0	2	2	0	0	0	0.110956	1	0
GNG8	0	2	1	1	0	0	0.110956	1	0
GPR137B	0	2	0	0	2	0	0.110956	1	1.74126
GPR172A	0	2	1	0	1	0	0.110956	1	0.693147
HABP2	0	2	0	0	2	1	0.110956	1	1.04811
HBZ	0	2	1	1	0	0	0.110956	1	0
HEJ1	0	2	0	0	2	0	0.110956	1	1.74126
HNF4G	0	2	1	0	1	1	0.110956	1	0
HNRNPAB	0	2	2	0	0	0	0.110956	1	0
HOXA2	0	2	1	1	0	0	0.110956	1	0
HOXB8	0	2	1	1	0	0	0.110956	1	0
HTR1E	0	2	0	0	2	0	0.110956	1	1.74126
ITGA11	0	2	1	0	1	0	0.110956	1	0.693147
KBTBD12	0	2	1	0	1	1	0.110956	1	0
KCTD12	0	2	0	2	0	0	0.110956	1	0
KIAA0141	0	2	1	0	1	0	0.110956	1	0.693147
KIAA0196	0	2	0	0	2	1	0.110956	1	1.04811
KIAA1009	0	2	0	0	2	1	0.110956	1	1.04811
KIAA1324L	0	2	0	0	2	0	0.110956	1	1.74126
LAMB4	0	2	0	0	2	1	0.110956	1	1.04811
LHFPL1	0	2	0	1	1	0	0.110956	1	0.693147
LMO1	0	2	0	2	0	0	0.110956	1	0
LOC255167	0	2	0	2	0	0	0.110956	1	0
LOC338651	0	2	0	0	2	0	0.110956	1	1.74126
LOC339524	0	2	0	0	2	0	0.110956	1	1.74126
LOC401387	0	2	1	0	1	0	0.110956	1	0.693147
LOC415056	0	2	0	0	2	0	0.110956	1	1.74126
LOC643008	0	2	1	0	1	0	0.110956	1	0.693147
LOC643763	0	2	2	0	0	0	0.110956	1	0
LOC654433	0	2	0	0	2	1	0.110956	1	1.04811
LRCH4	0	2	0	0	2	0	0.110956	1	1.74126
LRRC4B	0	2	0	0	2	1	0.110956	1	1.04811
MAPRE3	0	2	0	0	2	2	0.110956	1	0
MASP2	0	2	1	0	1	0	0.110956	1	0.693147
MATN4	0	2	2	0	0	0	0.110956	1	0
MGC15885	0	2	0	1	1	2	0.110956	1	-1.04811
MGC72080	0	2	0	1	1	1	0.110956	1	0
MS4A2	0	2	1	0	1	0	0.110956	1	0.693147
MTERF	0	2	1	0	1	1	0.110956	1	0
NCRNA00176	0	2	2	0	0	0	0.110956	1	0
NDP	0	2	0	0	2	0	0.110956	1	1.74126
NOVA2	0	2	0	1	1	0	0.110956	1	0.693147
NR4A3	0	2	0	0	2	0	0.110956	1	1.74126
NRGN	0	2	1	0	1	0	0.110956	1	0.693147
OAF	0	2	0	1	1	2	0.110956	1	-1.04811
PACRGL	0	2	1	1	0	2	0.110956	1	-1.74126
PAH	0	2	2	0	0	0	0.110956	1	0
PAIP2B	0	2	0	0	2	0	0.110956	1	1.74126
PDC	0	2	0	0	2	1	0.110956	1	1.04811
PHAX	0	2	0	1	1	1	0.110956	1	0
PIF1	0	2	0	1	1	0	0.110956	1	0.693147
PKD2L1	0	2	1	0	1	0	0.110956	1	0.693147
PNOC	0	2	0	0	2	1	0.110956	1	1.04811
PRINS	0	2	0	2	0	0	0.110956	1	0
PSCA	0	2	1	1	0	1	0.110956	1	-0.693147
PSD	0	2	0	0	2	0	0.110956	1	1.74126
RAB7A	0	2	0	0	2	2	0.110956	1	0
RANBP2	0	2	1	1	0	0	0.110956	1	0
RASGEF1C	0	2	0	0	2	1	0.110956	1	1.04811
RASSF6	0	2	0	0	2	1	0.110956	1	1.04811
RCSD1	0	2	0	0	2	0	0.110956	1	1.74126
RFNG	0	2	1	0	1	1	0.110956	1	0
RHOF	0	2	0	1	1	0	0.110956	1	0.693147
RHOJ	0	2	0	0	2	0	0.110956	1	1.74126
RIC3	0	2	0	0	2	0	0.110956	1	1.74126
RNPC3	0	2	1	0	1	2	0.110956	1	-1.04811
SERINC4	0	2	0	0	2	2	0.110956	1	0
SLC25A18	0	2	1	0	1	2	0.110956	1	-1.04811
SLC38A2	0	2	0	0	2	3	0.110956	1	-1.03133
SLC3A1	0	2	1	0	1	0	0.110956	1	0.693147
SLC46A3	0	2	1	1	0	1	0.110956	1	-0.693147
SLC7A5P2	0	2	1	1	0	0	0.110956	1	0
SLCO2A1	0	2	0	0	2	0	0.110956	1	1.74126
SMPD2	0	2	1	1	0	0	0.110956	1	0
SNORA13	0	2	1	1	0	0	0.110956	1	0
SOCS3	0	2	1	0	1	2	0.110956	1	-1.04811
SPA17	0	2	0	0	2	1	0.110956	1	1.04811
SPINK8	0	2	0	0	2	0	0.110956	1	1.74126
SPNS1	0	2	0	0	2	1	0.110956	1	1.04811
SPOCD1	0	2	0	0	2	0	0.110956	1	1.74126
STAT1	0	2	0	2	0	1	0.110956	1	-0.693147
STX1A	0	2	0	0	2	0	0.110956	1	1.74126
SUMO3	0	2	0	0	2	0	0.110956	1	1.74126
TET3	0	2	0	0	2	0	0.110956	1	1.74126
TFPI	0	2	0	0	2	0	0.110956	1	1.74126
TMED7	0	2	0	0	2	5	0.110956	1	-2.89037
TMED7-TICAM2	0	2	0	0	2	6	0.110956	1	-3.7216
TMEM205	0	2	1	0	1	0	0.110956	1	0.693147
TNFRSF10C	0	2	1	0	1	0	0.110956	1	0.693147
TNXB	0	2	0	0	2	0	0.110956	1	1.74126
TRIM52	0	2	1	1	0	1	0.110956	1	-0.693147
UBE2S	0	2	0	1	1	0	0.110956	1	0.693147
UGT1A5	0	2	0	0	2	0	0.110956	1	1.74126
VGF	0	2	1	1	0	0	0.110956	1	0
WDR88	0	2	1	0	1	2	0.110956	1	-1.04811
WDR93	0	2	0	0	2	0	0.110956	1	1.74126
WIPI2	0	2	1	0	1	0	0.110956	1	0.693147
YTHDF1	0	2	0	1	1	0	0.110956	1	0.693147
ZBED6	0	2	1	1	0	0	0.110956	1	0
ZBTB22	0	2	1	1	0	0	0.110956	1	0
ZNF319	0	2	1	1	0	0	0.110956	1	0
ZNF37A	0	2	1	0	1	0	0.110956	1	0.693147
ZNF416	0	2	2	0	0	0	0.110956	1	0
ZNF441	0	2	1	0	1	0	0.110956	1	0.693147
ZNF555	0	2	0	0	2	1	0.110956	1	1.04811
ZNF615	0	2	0	0	2	2	0.110956	1	0
ZNF654	0	2	2	0	0	0	0.110956	1	0
ZNF703	0	2	1	1	0	1	0.110956	1	-0.693147
ZNF782	0	2	0	0	2	0	0.110956	1	1.74126
ZNHIT1	0	2	0	2	0	1	0.110956	1	-0.693147
MKX	63	41	16	17	8	9	0.112428	1	-0.683985
LOC100289511	17	14	5	9	0	0	0.114645	1	0
TMEM101	17	14	2	3	9	6	0.114645	1	2.18616
VDAC1	17	14	0	0	14	9	0.114645	1	2.93103
LIMA1	37	26	8	8	10	10	0.114831	1	0
TASP1	37	26	0	0	26	13	0.114831	1	5.62351
HTR2C	65	42	8	11	23	23	0.115631	1	0
WDFY3	44	30	0	0	30	19	0.116751	1	4.06531
PTPN3	32	23	6	4	13	13	0.116985	1	0
TNRC18	32	23	2	0	21	14	0.116985	1	3.20424
UBR2	32	23	0	1	22	18	0.116985	1	1.67584
RTKN2	51	34	4	3	27	25	0.117238	1	0.704603
TIA1	51	34	1	1	32	18	0.117238	1	5.13
ALG3	22	17	5	3	9	12	0.117792	1	-1.84242
C20orf177	22	17	5	5	7	8	0.117792	1	-0.726712
EP300	22	17	2	1	14	7	0.117792	1	4.34173
MORF4L2	22	17	0	0	17	7	0.117792	1	5.81431
SPATS2	22	17	2	1	14	19	0.117792	1	-2.36728
NUAK2	27	20	2	0	18	23	0.118185	1	-2.06349
RAB12	27	20	1	0	19	16	0.118185	1	1.36669
PPP3CC	94	58	10	8	40	38	0.119302	1	0.532259
C12orf72	14	12	0	3	9	9	0.120011	1	0
CCNO	14	12	3	5	4	2	0.120011	1	1.99574
FDPS	14	12	2	3	7	9	0.120011	1	-1.4107
HOXB4	14	12	2	3	7	2	0.120011	1	4.49707
PPFIA3	14	12	3	3	6	5	0.120011	1	0.831229
SEC11A	14	12	2	4	6	11	0.120011	1	-3.44544
NDUFC1	39	27	3	3	21	16	0.120084	1	2.20364
PCDHA1	60	39	0	2	37	34	0.120256	1	0.853402
PCDHA10	60	39	0	2	37	34	0.120256	1	0.853402
PCDHA11	60	39	0	2	37	34	0.120256	1	0.853402
PCDHA12	60	39	0	2	37	34	0.120256	1	0.853402
PCDHA13	60	39	0	2	37	34	0.120256	1	0.853402
PCDHA2	60	39	0	2	37	34	0.120256	1	0.853402
PCDHA3	60	39	0	2	37	34	0.120256	1	0.853402
PCDHA4	60	39	0	2	37	34	0.120256	1	0.853402
PCDHA5	60	39	0	2	37	34	0.120256	1	0.853402
PCDHA6	60	39	0	2	37	34	0.120256	1	0.853402
PCDHA7	60	39	0	2	37	34	0.120256	1	0.853402
PCDHA8	60	39	0	2	37	34	0.120256	1	0.853402
PCDHA9	60	39	0	2	37	34	0.120256	1	0.853402
PCDHAC1	60	39	0	2	37	34	0.120256	1	0.853402
ALG9	5	6	3	1	2	4	0.121739	1	-1.99574
ANKRD16	5	6	4	0	2	2	0.121739	1	0
BIN2	5	6	0	0	6	2	0.121739	1	3.7216
C14orf153	5	6	1	0	5	4	0.121739	1	0.894632
C2orf62	5	6	1	3	2	2	0.121739	1	0
CHDH	5	6	0	0	6	4	0.121739	1	1.72586
DCAF7	5	6	0	1	5	2	0.121739	1	2.89037
DPY19L4	5	6	1	0	5	6	0.121739	1	-0.831229
FLCN	5	6	0	0	6	3	0.121739	1	2.69027
GPR128	5	6	0	0	6	6	0.121739	1	0
GSTZ1	5	6	2	0	4	2	0.121739	1	1.99574
HOXD13	5	6	2	0	4	2	0.121739	1	1.99574
KHDC1	5	6	1	1	4	2	0.121739	1	1.99574
LOC100130581	5	6	3	3	0	0	0.121739	1	0
LOC283856	5	6	2	3	1	4	0.121739	1	-3.04385
LOC401588	5	6	1	0	5	3	0.121739	1	1.85904
MAGED2	5	6	0	1	5	3	0.121739	1	1.85904
MAGI3	5	6	0	1	5	7	0.121739	1	-1.60669
METAP2	5	6	1	0	5	1	0.121739	1	3.93848
MGAT1	5	6	2	1	3	7	0.121739	1	-3.46574
NCRNA00245	5	6	0	1	5	1	0.121739	1	3.93848
NFATC1	5	6	0	0	6	3	0.121739	1	2.69027
OLIG2	5	6	1	0	5	1	0.121739	1	3.93848
PEX2	5	6	0	3	3	5	0.121739	1	-1.85904
PIGM	5	6	3	3	0	0	0.121739	1	0
PURB	5	6	2	4	0	0	0.121739	1	0
RBM7	5	6	0	0	6	2	0.121739	1	3.7216
REEP1	5	6	0	0	6	7	0.121739	1	-0.775464
S100A11	5	6	0	0	6	3	0.121739	1	2.69027
SCPEP1	5	6	0	1	5	3	0.121739	1	1.85904
STARD3	5	6	0	0	6	2	0.121739	1	3.7216
TMUB2	5	6	4	1	1	4	0.121739	1	-3.04385
TRIM14	5	6	0	0	6	2	0.121739	1	3.7216
TSPO	5	6	0	0	6	3	0.121739	1	2.69027
ZBED4	5	6	0	1	5	4	0.121739	1	0.894632
RIMS2	107	65	4	4	57	46	0.122463	1	2.40001
GATA2	34	24	0	3	21	16	0.123001	1	2.20364
AR	62	40	2	5	33	23	0.123664	1	3.36897
ALKBH4	11	10	0	0	10	3	0.124305	1	5.52277
BTBD11	11	10	0	0	10	3	0.124305	1	5.52277
CCDC137	11	10	2	2	6	7	0.124305	1	-0.775464
CFL2	11	10	2	2	6	5	0.124305	1	0.831229
COL11A1	11	10	2	1	7	4	0.124305	1	2.50133
F12	11	10	2	2	6	5	0.124305	1	0.831229
NCRNA00095	11	10	6	4	0	0	0.124305	1	0
NRD1	11	10	2	0	8	4	0.124305	1	3.22804
PAX6	11	10	0	0	10	7	0.124305	1	2.05703
PNRC1	11	10	2	0	8	4	0.124305	1	3.22804
PPEF1	11	10	0	0	10	7	0.124305	1	2.05703
PTBP2	11	10	0	0	10	7	0.124305	1	2.05703
SCMH1	11	10	0	0	10	7	0.124305	1	2.05703
ZNF174	11	10	4	6	0	0	0.124305	1	0
HOXA11AS	19	15	3	1	11	4	0.125042	1	5.1713
HTT	19	15	2	1	12	7	0.125042	1	3.25312
STAT5B	19	15	0	2	13	11	0.125042	1	1.13953
THBS3	19	15	8	2	5	5	0.125042	1	0
SLC3A2	80	50	10	6	34	39	0.125066	1	-1.39556
KHDRBS3	41	28	0	0	28	19	0.125149	1	3.41092
GPR125	29	21	0	0	21	10	0.125203	1	5.48894
MAP7D2	29	21	12	8	1	2	0.125203	1	-1.04811
ACAP3	8	8	0	0	8	3	0.126078	1	4.19245
BOC	8	8	0	1	7	7	0.126078	1	0
C9orf153	8	8	0	0	8	3	0.126078	1	4.19245
CAPNS1	8	8	0	1	7	1	0.126078	1	5.54518
CHCHD1	8	8	1	1	6	5	0.126078	1	0.831229
DALRD3	8	8	2	1	5	5	0.126078	1	0
GFPT2	8	8	0	1	7	11	0.126078	1	-2.66997
HMGB1	8	8	1	0	7	3	0.126078	1	3.46574
LDHB	8	8	1	0	7	4	0.126078	1	2.50133
LOC645676	8	8	4	4	0	0	0.126078	1	0
MAB21L1	8	8	0	8	0	0	0.126078	1	0
N4BP2L2	8	8	1	1	6	5	0.126078	1	0.831229
NR2F6	8	8	2	2	4	4	0.126078	1	0
PAK1	8	8	1	1	6	3	0.126078	1	2.69027
RABGAP1L	8	8	0	0	8	3	0.126078	1	4.19245
SBK1	8	8	6	1	1	1	0.126078	1	0
STK32B	8	8	0	0	8	5	0.126078	1	2.33341
TCF19	8	8	6	0	2	2	0.126078	1	0
ZNF512	8	8	0	3	5	3	0.126078	1	1.85904
IFT74	24	18	0	0	18	16	0.126185	1	0.927109
NECAB2	24	18	0	0	18	16	0.126185	1	0.927109
PHF14	24	18	0	5	13	7	0.126185	1	3.8095
MPPED2	215	123	2	1	120	120	0.126828	1	0
BCAT1	102	62	3	4	55	53	0.128017	1	0.420492
FERMT1	66	42	4	6	32	39	0.130237	1	-1.99419
ITSN1	95	58	2	1	55	60	0.131633	1	-1.00387
TRDMT1	31	22	0	0	22	13	0.131881	1	4.13577
ASFMR1	16	13	4	3	6	3	0.132395	1	2.69027
C10orf110	16	13	0	0	13	3	0.132395	1	7.27524
LRP4	16	13	0	0	13	6	0.132395	1	4.58497
ME1	16	13	2	0	11	10	0.132395	1	0.612942
NFE2L1	16	13	2	2	9	5	0.132395	1	3.01739
PSMB10	16	13	5	4	4	2	0.132395	1	1.99574
SPOP	16	13	0	1	12	7	0.132395	1	3.25312
SVIL	16	13	0	0	13	9	0.132395	1	2.39881
TBL1XR1	16	13	0	0	13	8	0.132395	1	3.08279
PTPRK	26	19	0	0	19	14	0.134094	1	2.36728
HDLBP	38	26	0	1	25	10	0.1343	1	7.01913
HOXC4	21	16	6	1	9	5	0.134709	1	3.01739
PRR4	21	16	1	1	14	9	0.134709	1	2.93103
PUS7L	21	16	4	3	9	4	0.134709	1	3.91202
ERCC6	45	30	3	2	25	35	0.134748	1	-3.21204
C15orf41	110	66	1	1	64	64	0.136205	1	0
NFIC	136	80	2	0	78	60	0.138224	1	3.16353
GNL3L	47	31	9	14	8	13	0.139299	1	-3.08279
SMARCD3	47	31	2	0	29	22	0.139299	1	2.5057
TNMD	47	31	3	4	24	13	0.139299	1	4.90017
NXPH1	63	40	0	0	40	33	0.139329	1	1.95543
ADAMTS3	13	11	0	0	11	11	0.139512	1	0
ALKBH2	13	11	2	3	6	5	0.139512	1	0.831229
CCDC43	13	11	1	0	10	5	0.139512	1	3.66372
EFCAB4B	13	11	0	0	11	8	0.139512	1	1.94326
FLJ39582	13	11	6	4	1	1	0.139512	1	0
GSK3B	13	11	1	1	9	7	0.139512	1	1.4107
PMM2	13	11	0	0	11	7	0.139512	1	2.66997
TUSC3	13	11	0	0	11	6	0.139512	1	3.44544
ZNF629	13	11	1	2	8	7	0.139512	1	0.726712
ARRDC3	72	45	3	6	36	32	0.139527	1	1.17315
ST5	103	62	0	1	61	47	0.140419	1	2.95326
NEDD9	127	75	1	2	72	78	0.141091	1	-0.98685
BACH2	28	20	2	0	18	17	0.141554	1	0.45513
PAWR	49	32	1	1	30	27	0.143694	1	0.993557
ANKRD17	23	17	2	1	14	7	0.143713	1	4.34173
ZBTB38	23	17	0	0	17	12	0.143713	1	2.56119
CCDC88A	18	14	1	2	11	8	0.143722	1	1.94326
EYA1	18	14	1	1	12	12	0.143722	1	0
MAP2K1	18	14	1	1	12	11	0.143722	1	0.583143
PFN2	18	14	0	1	13	14	0.143722	1	-0.532228
PLEKHB2	18	14	1	2	11	13	0.143722	1	-1.13953
SCAF1	18	14	0	0	14	23	0.143722	1	-3.9912
SLC30A4	18	14	7	4	3	6	0.143722	1	-2.69027
LOXL3	35	24	0	10	14	16	0.144301	1	-1.0006
OSBPL1A	35	24	0	0	24	16	0.144301	1	3.36734
AMACR	4	5	0	1	4	2	0.144491	1	1.99574
ANO1	4	5	0	0	5	8	0.144491	1	-2.33341
ARHGEF10L	4	5	0	0	5	5	0.144491	1	0
ARRDC2	4	5	2	0	3	3	0.144491	1	0
BRSK2	4	5	0	0	5	1	0.144491	1	3.93848
C11orf68	4	5	1	0	4	1	0.144491	1	3.04385
C11orf71	4	5	1	1	3	0	0.144491	1	2.77259
C14orf2	4	5	1	1	3	2	0.144491	1	1.03133
C4orf10	4	5	0	5	0	0	0.144491	1	0
C8orf31	4	5	1	3	1	3	0.144491	1	-2.07944
CARD9	4	5	3	2	0	1	0.144491	1	-0.693147
CCDC48	4	5	0	1	4	3	0.144491	1	0.96441
CD2BP2	4	5	2	2	1	2	0.144491	1	-1.04811
CLCN6	4	5	2	1	2	0	0.144491	1	1.74126
CSF1	4	5	0	2	3	2	0.144491	1	1.03133
CUL2	4	5	0	0	5	4	0.144491	1	0.894632
DHCR24	4	5	2	1	2	0	0.144491	1	1.74126
DMXL2	4	5	0	0	5	4	0.144491	1	0.894632
EID2B	4	5	2	3	0	0	0.144491	1	0
EPN1	4	5	1	0	4	0	0.144491	1	3.737
FAM19A2	4	5	0	0	5	8	0.144491	1	-2.33341
FKRP	4	5	0	0	5	4	0.144491	1	0.894632
GNPDA2	4	5	1	0	4	2	0.144491	1	1.99574
GOLM1	4	5	1	0	4	1	0.144491	1	3.04385
GSTP1	4	5	0	1	4	4	0.144491	1	0
HMGN1	4	5	0	0	5	2	0.144491	1	2.89037
IDH3G	4	5	1	0	4	4	0.144491	1	0
IFNAR2	4	5	0	0	5	0	0.144491	1	4.63163
IRF5	4	5	1	0	4	1	0.144491	1	3.04385
ITGB3BP	4	5	0	0	5	2	0.144491	1	2.89037
KLC4	4	5	2	2	1	1	0.144491	1	0
LOC91316	4	5	2	1	2	1	0.144491	1	1.04811
LOH12CR2	4	5	2	3	0	0	0.144491	1	0
LSMD1	4	5	2	3	0	1	0.144491	1	-0.693147
LYN	4	5	0	0	5	8	0.144491	1	-2.33341
MMP20	4	5	0	0	5	2	0.144491	1	2.89037
MTF1	4	5	1	1	3	2	0.144491	1	1.03133
MUC4	4	5	0	0	5	0	0.144491	1	4.63163
MXD1	4	5	0	0	5	2	0.144491	1	2.89037
NDUFA12	4	5	0	0	5	3	0.144491	1	1.85904
PKD2L2	4	5	1	0	4	3	0.144491	1	0.96441
PRR5	4	5	0	0	5	1	0.144491	1	3.93848
RAB3GAP1	4	5	2	0	3	1	0.144491	1	2.07944
RAB4B	4	5	1	0	4	3	0.144491	1	0.96441
RAP1B	4	5	0	0	5	1	0.144491	1	3.93848
RAP1GAP	4	5	0	0	5	2	0.144491	1	2.89037
RCN1	4	5	0	1	4	1	0.144491	1	3.04385
SCAND1	4	5	3	2	0	0	0.144491	1	0
SCUBE3	4	5	0	0	5	1	0.144491	1	3.93848
SLC22A5	4	5	1	0	4	1	0.144491	1	3.04385
SUMF1	4	5	0	0	5	4	0.144491	1	0.894632
TCN2	4	5	1	2	2	0	0.144491	1	1.74126
TEX264	4	5	0	0	5	5	0.144491	1	0
THYN1	4	5	0	3	2	1	0.144491	1	1.04811
TNFSF12	4	5	0	0	5	2	0.144491	1	2.89037
TRAPPC6B	4	5	2	1	2	0	0.144491	1	1.74126
UNC13A	4	5	1	0	4	2	0.144491	1	1.99574
VAMP4	4	5	0	0	5	1	0.144491	1	3.93848
VIM	4	5	1	4	0	1	0.144491	1	-0.693147
ZC3H7A	4	5	0	0	5	1	0.144491	1	3.93848
ZNF200	4	5	2	1	2	1	0.144491	1	1.04811
ZNF718	4	5	0	0	5	7	0.144491	1	-1.60669
PBLD	42	28	0	0	28	24	0.144706	1	1.41026
B4GALT1	10	9	1	1	7	6	0.14565	1	0.775464
BCL2L12	10	9	2	2	5	2	0.14565	1	2.89037
C5orf42	10	9	0	0	9	6	0.14565	1	2.18616
CDYL	10	9	0	0	9	6	0.14565	1	2.18616
CSNK1G2	10	9	0	0	9	7	0.14565	1	1.4107
DCAF10	10	9	0	3	6	7	0.14565	1	-0.775464
DPP7	10	9	5	2	2	1	0.14565	1	1.04811
GYS1	10	9	0	1	8	6	0.14565	1	1.50218
HBXIP	10	9	0	0	9	3	0.14565	1	4.87643
LOC100009676	10	9	4	5	0	0	0.14565	1	0
MIF4GD	10	9	0	0	9	3	0.14565	1	4.87643
PHLDB1	10	9	0	0	9	2	0.14565	1	5.90776
PRSS36	10	9	3	1	5	2	0.14565	1	2.89037
RGS20	10	9	0	1	8	5	0.14565	1	2.33341
SCAMP1	10	9	1	0	8	3	0.14565	1	4.19245
SNRPC	10	9	5	1	3	2	0.14565	1	1.03133
ZMYM2	10	9	0	1	8	3	0.14565	1	4.19245
ZNF721	10	9	1	1	7	4	0.14565	1	2.50133
GLT25D2	109	65	2	2	61	42	0.146633	1	4.1645
ALDOA	51	33	7	6	20	17	0.147941	1	1.31988
SIPA1L1	51	33	1	0	32	32	0.147941	1	0
ARFGEF1	7	7	1	0	6	5	0.149017	1	0.831229
BMI1	7	7	1	0	6	3	0.149017	1	2.69027
C17orf59	7	7	5	2	0	0	0.149017	1	0
C17orf97	7	7	0	1	6	2	0.149017	1	3.7216
C3orf34	7	7	3	2	2	5	0.149017	1	-2.89037
CASD1	7	7	0	0	7	7	0.149017	1	0
CDHR2	7	7	1	2	4	3	0.149017	1	0.96441
CNOT6	7	7	1	2	4	8	0.149017	1	-3.22804
COL18A1	7	7	0	0	7	2	0.149017	1	4.49707
COMTD1	7	7	2	2	3	2	0.149017	1	1.03133
DPYSL5	7	7	1	0	6	7	0.149017	1	-0.775464
ECH1	7	7	3	1	3	4	0.149017	1	-0.96441
ESR2	7	7	1	0	6	11	0.149017	1	-3.44544
GIPR	7	7	0	0	7	3	0.149017	1	3.46574
GPR162	7	7	4	1	2	0	0.149017	1	1.74126
HNRNPU	7	7	4	2	1	0	0.149017	1	0.693147
LMNB2	7	7	2	4	1	3	0.149017	1	-2.07944
LOC400657	7	7	2	4	1	0	0.149017	1	0.693147
LOC644538	7	7	3	4	0	0	0.149017	1	0
LRRK2	7	7	0	2	5	4	0.149017	1	0.894632
NME2	7	7	0	1	6	5	0.149017	1	0.831229
NT5DC1	7	7	0	0	7	7	0.149017	1	0
PCBP1	7	7	3	4	0	0	0.149017	1	0
PPP1R14B	7	7	0	0	7	3	0.149017	1	3.46574
PPP5C	7	7	0	1	6	6	0.149017	1	0
REEP5	7	7	0	1	6	1	0.149017	1	4.76971
RFESD	7	7	3	1	3	1	0.149017	1	2.07944
RNF34	7	7	1	0	6	8	0.149017	1	-1.50218
SLC6A6	7	7	1	2	4	4	0.149017	1	0
THBS2	7	7	3	0	4	5	0.149017	1	-0.894632
TRIB3	7	7	1	3	3	2	0.149017	1	1.03133
WDR12	7	7	3	3	1	4	0.149017	1	-3.04385
ZNF195	7	7	0	0	7	0	0.149017	1	6.23832
ZNF280C	60	38	0	2	36	20	0.149177	1	5.4384
ATN1	37	25	2	3	20	15	0.150083	1	2.28215
FOXO3	113	67	0	0	67	40	0.15061	1	5.79044
AKAP8	25	18	0	0	18	15	0.152117	1	1.41741
MKNK2	25	18	3	6	9	10	0.152117	1	-0.646333
SPEF2	25	18	0	0	18	16	0.152117	1	0.927109
TMTC2	62	39	0	0	39	26	0.152709	1	3.96062
C17orf48	15	12	2	1	9	11	0.153107	1	-1.25928
EFR3A	15	12	0	1	11	10	0.153107	1	0.612942
HES7	15	12	1	1	10	6	0.153107	1	2.83249
LOC285375	15	12	0	0	12	8	0.153107	1	2.5264
NEAT1	15	12	5	7	0	0	0.153107	1	0
PCNX	15	12	2	0	10	10	0.153107	1	0
PHC3	15	12	0	0	12	7	0.153107	1	3.25312
TMEM62	15	12	3	2	7	4	0.153107	1	2.50133
TRMT1	15	12	3	3	6	4	0.153107	1	1.72586
NCRNA00167	20	15	8	7	0	0	0.154114	1	0
SNX17	20	15	3	2	10	6	0.154114	1	2.83249
PARK2	296	164	0	1	163	163	0.154936	1	0
SGCE	32	22	1	0	21	17	0.15527	1	1.73166
C7orf44	39	26	1	2	23	20	0.155606	1	1.19875
NUDT3	39	26	2	2	22	22	0.155606	1	0
NEO1	55	35	0	0	35	20	0.156019	1	5.15402
P4HTM	48	31	7	4	20	12	0.15885	1	3.88107
FLJ13224	27	19	11	8	0	0	0.159979	1	0
NOVA1	27	19	4	0	15	7	0.159979	1	4.85203
DMXL1	41	27	0	0	27	26	0.160885	1	0.347756
C5orf41	34	23	13	8	2	3	0.161587	1	-1.03133
IFT81	34	23	6	2	15	8	0.161587	1	4.12532
LRRIQ4	34	23	0	4	19	19	0.161587	1	0
DOCK3	125	73	8	2	63	46	0.161808	1	3.56731
ATP2A1	12	10	1	1	8	10	0.162563	1	-1.33032
CDCA4	12	10	0	0	10	9	0.162563	1	0.646333
CHPT1	12	10	1	0	9	6	0.162563	1	2.18616
DNAH3	12	10	0	0	10	9	0.162563	1	0.646333
EIF2C4	12	10	2	1	7	3	0.162563	1	3.46574
GDAP2	12	10	2	0	8	10	0.162563	1	-1.33032
HMGN4	12	10	0	0	10	4	0.162563	1	4.55836
IARS	12	10	3	1	6	11	0.162563	1	-3.44544
LOXL1	12	10	1	0	9	7	0.162563	1	1.4107
NOG	12	10	2	8	0	0	0.162563	1	0
NUDT19	12	10	4	0	6	2	0.162563	1	3.7216
PC	12	10	0	0	10	9	0.162563	1	0.646333
RAB28	12	10	0	0	10	9	0.162563	1	0.646333
RNASEK	12	10	3	4	3	4	0.162563	1	-0.96441
TMEM203	12	10	5	5	0	0	0.162563	1	0
TROVE2	12	10	0	1	9	6	0.162563	1	2.18616
WDR83	12	10	3	1	6	10	0.162563	1	-2.83249
FNDC3B	22	16	0	0	16	16	0.163683	1	0
PARP9	22	16	2	2	12	5	0.163683	1	4.85981
TRPS1	90	54	5	2	47	47	0.163864	1	0
KCNK2	79	48	0	0	48	34	0.163865	1	3.61506
MATR3	79	48	0	0	48	37	0.163865	1	2.76165
PLEKHG1	223	125	0	1	124	102	0.164583	1	2.64287
MGST1	17	13	0	1	12	12	0.165329	1	0
RSBN1	17	13	5	3	5	5	0.165329	1	0
BAZ1A	29	20	0	3	17	9	0.167349	1	4.40361
FILIP1	36	24	0	0	24	14	0.16758	1	4.36794
NRP1	357	195	6	5	184	167	0.168673	1	1.43852
TRIM54	72	44	6	2	36	31	0.168952	1	1.48223
ARPC5L	9	8	0	0	8	4	0.171323	1	3.22804
CAPN8	9	8	0	0	8	6	0.171323	1	1.50218
CORO2B	9	8	0	0	8	10	0.171323	1	-1.33032
DDRGK1	9	8	1	0	7	10	0.171323	1	-2.05703
DENND1B	9	8	0	0	8	12	0.171323	1	-2.5264
EDEM2	9	8	2	2	4	0	0.171323	1	3.737
EEA1	9	8	0	0	8	2	0.171323	1	5.22378
EIF4ENIF1	9	8	0	3	5	5	0.171323	1	0
FAH	9	8	0	0	8	4	0.171323	1	3.22804
FLJ35776	9	8	2	1	5	6	0.171323	1	-0.831229
H2AFY	9	8	1	2	5	4	0.171323	1	0.894632
JAGN1	9	8	0	1	7	6	0.171323	1	0.775464
KBTBD3	9	8	1	0	7	2	0.171323	1	4.49707
KIAA1109	9	8	2	0	6	4	0.171323	1	1.72586
KLF3	9	8	2	0	6	1	0.171323	1	4.76971
LHX2	9	8	0	1	7	7	0.171323	1	0
LIFR	9	8	0	0	8	8	0.171323	1	0
LOC286135	9	8	0	0	8	6	0.171323	1	1.50218
LPP	9	8	2	2	4	4	0.171323	1	0
LRRN3	9	8	0	1	7	8	0.171323	1	-0.726712
MUS81	9	8	1	3	4	6	0.171323	1	-1.72586
NEURL2	9	8	4	3	1	1	0.171323	1	0
NFKBIZ	9	8	0	1	7	7	0.171323	1	0
PGM2L1	9	8	0	2	6	6	0.171323	1	0
PTPN6	9	8	3	2	3	2	0.171323	1	1.03133
SOCS2	9	8	1	2	5	6	0.171323	1	-0.831229
STT3B	9	8	1	2	5	4	0.171323	1	0.894632
TACR1	9	8	0	0	8	4	0.171323	1	3.22804
THUMPD2	9	8	0	0	8	4	0.171323	1	3.22804
TRAF4	9	8	1	1	6	4	0.171323	1	1.72586
XRN2	9	8	0	0	8	6	0.171323	1	1.50218
GUCA1A	54	34	0	1	33	22	0.171484	1	3.75663
ZNF516	109	64	2	1	61	64	0.171513	1	-0.565927
SORBS2	24	17	2	1	14	10	0.172523	1	2.2847
ADH5	3	4	0	0	4	4	0.172941	1	0
AKAP7	3	4	0	0	4	2	0.172941	1	1.99574
ARSK	3	4	0	0	4	1	0.172941	1	3.04385
ATHL1	3	4	1	1	2	0	0.172941	1	1.74126
ATP6V1B1	3	4	0	0	4	2	0.172941	1	1.99574
B4GALT4	3	4	0	0	4	2	0.172941	1	1.99574
C11orf52	3	4	3	1	0	1	0.172941	1	-0.693147
C15orf29	3	4	0	0	4	1	0.172941	1	3.04385
C19orf20	3	4	1	0	3	0	0.172941	1	2.77259
C1orf159	3	4	0	1	3	0	0.172941	1	2.77259
C1orf183	3	4	0	0	4	4	0.172941	1	0
C21orf63	3	4	1	1	2	3	0.172941	1	-1.03133
C2orf43	3	4	0	0	4	2	0.172941	1	1.99574
C6orf64	3	4	1	0	3	1	0.172941	1	2.07944
CASP3	3	4	0	1	3	1	0.172941	1	2.07944
CBR3	3	4	0	0	4	2	0.172941	1	1.99574
CCDC76	3	4	1	2	1	5	0.172941	1	-3.93848
COX11	3	4	0	1	3	2	0.172941	1	1.03133
CRISPLD2	3	4	0	0	4	1	0.172941	1	3.04385
DAZAP2	3	4	1	1	2	1	0.172941	1	1.04811
DFFB	3	4	1	1	2	0	0.172941	1	1.74126
DHRS7	3	4	0	0	4	0	0.172941	1	3.737
DPM2	3	4	0	1	3	5	0.172941	1	-1.85904
DYNC1LI2	3	4	0	0	4	1	0.172941	1	3.04385
EXTL1	3	4	1	2	1	2	0.172941	1	-1.04811
FAM115A	3	4	0	0	4	1	0.172941	1	3.04385
FAM163A	3	4	3	1	0	0	0.172941	1	0
FBXO33	3	4	0	0	4	1	0.172941	1	3.04385
FBXO8	3	4	1	1	2	1	0.172941	1	1.04811
FKBP7	3	4	0	0	4	2	0.172941	1	1.99574
GLRX2	3	4	1	0	3	0	0.172941	1	2.77259
GPR64	3	4	0	0	4	2	0.172941	1	1.99574
HDHD1A	3	4	0	0	4	3	0.172941	1	0.96441
HSD17B8	3	4	0	1	3	2	0.172941	1	1.03133
HUS1	3	4	0	3	1	2	0.172941	1	-1.04811
IDH3B	3	4	0	1	3	0	0.172941	1	2.77259
IFIT1	3	4	0	0	4	0	0.172941	1	3.737
IGF2R	3	4	0	0	4	2	0.172941	1	1.99574
ILVBL	3	4	0	0	4	3	0.172941	1	0.96441
KREMEN2	3	4	1	3	0	0	0.172941	1	0
LYSMD3	3	4	0	0	4	2	0.172941	1	1.99574
MAP4K2	3	4	1	0	3	0	0.172941	1	2.77259
MARCH4	3	4	0	0	4	5	0.172941	1	-0.894632
MLF2	3	4	2	0	2	3	0.172941	1	-1.03133
NAB1	3	4	1	1	2	2	0.172941	1	0
NXPH2	3	4	0	0	4	1	0.172941	1	3.04385
OSBPL5	3	4	1	0	3	1	0.172941	1	2.07944
PABPC4L	3	4	0	4	0	0	0.172941	1	0
PALM2-AKAP2	3	4	0	0	4	4	0.172941	1	0
PDCL	3	4	0	1	3	2	0.172941	1	1.03133
PHPT1	3	4	2	1	1	0	0.172941	1	0.693147
PLD3	3	4	0	0	4	3	0.172941	1	0.96441
POU2F2	3	4	1	0	3	4	0.172941	1	-0.96441
PRKG2	3	4	0	0	4	1	0.172941	1	3.04385
PSRC1	3	4	0	1	3	0	0.172941	1	2.77259
R3HCC1	3	4	1	0	3	1	0.172941	1	2.07944
RBL2	3	4	1	0	3	1	0.172941	1	2.07944
RGMB	3	4	0	0	4	3	0.172941	1	0.96441
RYK	3	4	0	0	4	3	0.172941	1	0.96441
SEPT1	3	4	2	1	1	1	0.172941	1	0
SH2B2	3	4	0	0	4	0	0.172941	1	3.737
SLC17A9	3	4	0	0	4	8	0.172941	1	-3.22804
SLC7A2	3	4	0	0	4	2	0.172941	1	1.99574
SNX27	3	4	1	0	3	3	0.172941	1	0
SSH3	3	4	0	0	4	4	0.172941	1	0
STARD10	3	4	3	0	1	1	0.172941	1	0
SYNGR1	3	4	0	0	4	3	0.172941	1	0.96441
TELO2	3	4	0	1	3	2	0.172941	1	1.03133
TEP1	3	4	0	0	4	3	0.172941	1	0.96441
TIGD1	3	4	3	1	0	0	0.172941	1	0
TLR5	3	4	0	0	4	2	0.172941	1	1.99574
TMEM156	3	4	0	0	4	0	0.172941	1	3.737
TWF1	3	4	0	0	4	0	0.172941	1	3.737
U2AF1	3	4	0	0	4	5	0.172941	1	-0.894632
UBE2J2	3	4	0	1	3	3	0.172941	1	0
WDR53	3	4	0	0	4	3	0.172941	1	0.96441
WNT2B	3	4	0	1	3	2	0.172941	1	1.03133
ZNF19	3	4	0	0	4	1	0.172941	1	3.04385
ZNF426	3	4	0	0	4	3	0.172941	1	0.96441
ZNF551	3	4	1	0	3	0	0.172941	1	2.77259
ZNF620	3	4	0	0	4	2	0.172941	1	1.99574
ZSWIM4	3	4	0	0	4	4	0.172941	1	0
KNTC1	38	25	1	3	21	19	0.173276	1	0.836953
RPL27A	38	25	6	16	3	16	0.173276	1	-8.80807
IQCJ	31	21	0	0	21	22	0.174273	1	-0.39931
ZNF580	31	21	4	14	3	9	0.174273	1	-4.87643
CBARA1	47	30	1	0	29	29	0.175417	1	0
TACC1	100	59	1	1	57	61	0.17548	1	-0.78777
CADPS2	19	14	0	0	14	8	0.17638	1	3.61502
CALR3	19	14	3	2	9	4	0.17638	1	3.91202
FLAD1	19	14	5	4	5	3	0.17638	1	1.85904
GLRB	19	14	0	0	14	16	0.17638	1	-1.0006
GPATCH3	19	14	6	5	3	1	0.17638	1	2.07944
HIPK2	19	14	0	1	13	3	0.17638	1	7.27524
HOXA10	19	14	7	3	4	1	0.17638	1	3.04385
LAMC1	19	14	0	0	14	7	0.17638	1	4.34173
ABCA11P	6	6	1	1	4	2	0.17726	1	1.99574
ALDH3B1	6	6	0	1	5	2	0.17726	1	2.89037
ANKRD26	6	6	1	3	2	1	0.17726	1	1.04811
ARL5B	6	6	0	0	6	4	0.17726	1	1.72586
C11orf63	6	6	0	0	6	3	0.17726	1	2.69027
C13orf38	6	6	2	1	3	5	0.17726	1	-1.85904
C3orf78	6	6	0	0	6	2	0.17726	1	3.7216
CNIH4	6	6	0	1	5	6	0.17726	1	-0.831229
CNNM1	6	6	2	3	1	1	0.17726	1	0
DDHD2	6	6	0	1	5	1	0.17726	1	3.93848
DENND4B	6	6	0	0	6	6	0.17726	1	0
FAM113A	6	6	1	1	4	2	0.17726	1	1.99574
FRRS1	6	6	0	0	6	1	0.17726	1	4.76971
GTF2A1L	6	6	0	0	6	1	0.17726	1	4.76971
KIF1C	6	6	2	1	3	2	0.17726	1	1.03133
KLC2	6	6	3	2	1	1	0.17726	1	0
LZIC	6	6	2	2	2	0	0.17726	1	1.74126
NDRG3	6	6	0	0	6	3	0.17726	1	2.69027
NIPA1	6	6	0	1	5	5	0.17726	1	0
OCLN	6	6	1	1	4	3	0.17726	1	0.96441
PEF1	6	6	2	0	4	2	0.17726	1	1.99574
PERP	6	6	0	0	6	1	0.17726	1	4.76971
PIGF	6	6	0	0	6	1	0.17726	1	4.76971
PRKCSH	6	6	2	1	3	1	0.17726	1	2.07944
RANBP6	6	6	2	4	0	0	0.17726	1	0
SFRS5	6	6	2	1	3	0	0.17726	1	2.77259
SLC25A42	6	6	1	1	4	1	0.17726	1	3.04385
SLC39A14	6	6	2	0	4	3	0.17726	1	0.96441
SNX15	6	6	2	1	3	7	0.17726	1	-3.46574
THRAP3	6	6	1	0	5	6	0.17726	1	-0.831229
TNFSF13	6	6	4	2	0	0	0.17726	1	0
XRRA1	6	6	1	0	5	2	0.17726	1	2.89037
ZNHIT2	6	6	2	4	0	0	0.17726	1	0
AIFM2	14	11	0	1	10	8	0.177331	1	1.33032
ASXL1	14	11	3	0	8	6	0.177331	1	1.50218
C7orf68	14	11	2	0	9	6	0.177331	1	2.18616
CTAGE5	14	11	4	0	7	9	0.177331	1	-1.4107
DICER1	14	11	0	1	10	9	0.177331	1	0.646333
ITGA2	14	11	0	0	11	1	0.177331	1	8.21515
JUB	14	11	1	3	7	6	0.177331	1	0.775464
NCRNA00271	14	11	0	0	11	7	0.177331	1	2.66997
TATDN2	14	11	3	1	7	6	0.177331	1	0.775464
TRPV2	14	11	1	3	7	6	0.177331	1	0.775464
CHD9	91	54	3	6	45	49	0.179386	1	-0.931157
GPR158	69	42	0	0	42	57	0.180567	1	-3.37673
EHMT1	26	18	0	0	18	10	0.180718	1	4.21241
FSTL3	26	18	12	3	3	2	0.180718	1	1.03133
HOXB2	26	18	7	5	6	5	0.180718	1	0.831229
CAPZA1	33	22	0	8	14	14	0.180793	1	0
DKFZp686O24166	33	22	1	1	20	11	0.180793	1	4.46421
VRK2	42	27	1	2	24	25	0.183858	1	-0.36649
C21orf33	21	15	1	2	12	7	0.186427	1	3.25312
FBXO22	21	15	4	2	9	9	0.186427	1	0
GAB1	21	15	0	1	14	6	0.186427	1	5.1172
HOXC5	21	15	6	1	8	5	0.186427	1	2.33341
HOXC6	21	15	6	1	8	5	0.186427	1	2.33341
PRH1	21	15	1	1	13	9	0.186427	1	2.39881
RECK	21	15	0	0	15	7	0.186427	1	4.85203
ARHGAP24	35	23	0	0	23	14	0.186943	1	3.9912
GPC4	35	23	2	0	21	20	0.186943	1	0.411784
C16orf45	28	19	0	0	19	19	0.188339	1	0
NAV2	28	19	0	0	19	23	0.188339	1	-1.62392
BFAR	64	39	0	2	37	42	0.189801	1	-1.31948
AES	11	9	3	3	3	6	0.189935	1	-2.69027
AK4	11	9	0	0	9	3	0.189935	1	4.87643
ALK	11	9	0	0	9	7	0.189935	1	1.4107
CACNA2D4	11	9	0	1	8	4	0.189935	1	3.22804
CAPN1	11	9	1	0	8	4	0.189935	1	3.22804
CP	11	9	1	3	5	3	0.189935	1	1.85904
DLX5	11	9	0	1	8	4	0.189935	1	3.22804
IL12RB2	11	9	4	0	5	5	0.189935	1	0
KCTD8	11	9	0	0	9	4	0.189935	1	3.91202
NCRNA00265	11	9	2	1	6	2	0.189935	1	3.7216
NMNAT3	11	9	1	2	6	13	0.189935	1	-4.58497
SND1	11	9	0	0	9	10	0.189935	1	-0.646333
TMED3	11	9	2	1	6	2	0.189935	1	3.7216
TTBK2	11	9	0	0	9	6	0.189935	1	2.18616
TYSND1	11	9	2	4	3	4	0.189935	1	-0.96441
NRSN2	16	12	0	1	11	6	0.190352	1	3.44544
PRKCE	16	12	2	1	9	9	0.190352	1	0
RPL27	16	12	3	0	9	2	0.190352	1	5.90776
RTDR1	16	12	0	0	12	7	0.190352	1	3.25312
BAZ1B	55	34	2	0	32	26	0.192224	1	1.96643
FGF13	55	34	1	2	31	23	0.192224	1	2.75742
CRISPLD1	37	24	4	3	17	12	0.192756	1	2.56119
SOHLH2	37	24	1	1	22	15	0.192756	1	3.09325
LHFP	66	40	0	1	39	35	0.193114	1	1.10543
CDKAL1	341	185	0	0	185	170	0.194898	1	1.25763
MIAT	30	20	8	2	10	8	0.195446	1	1.33032
GOLPH3	23	16	3	4	9	9	0.195607	1	0
MYO19	23	16	5	1	10	14	0.195607	1	-2.2847
SNX2	23	16	0	1	15	9	0.195607	1	3.44133
YPEL3	23	16	6	4	6	4	0.195607	1	1.72586
MYO9A	48	30	1	1	28	27	0.197992	1	0.339169
SLC2A13	48	30	1	0	29	25	0.197992	1	1.37482
CYTSB	39	25	0	0	25	22	0.19826	1	1.13088
CC2D2A	18	13	0	1	12	9	0.201934	1	1.84242
GARNL3	18	13	1	4	8	6	0.201934	1	1.50218
HEXIM1	18	13	5	8	0	0	0.201934	1	0
KIAA0114	18	13	4	5	4	3	0.201934	1	0.96441
TMEM80	18	13	0	0	13	10	0.201934	1	1.75247
ALG8	32	21	3	0	18	22	0.202093	1	-1.67584
KLRB1	32	21	1	2	18	18	0.202093	1	0
SEC14L2	32	21	7	14	0	0	0.202093	1	0
ADAMTS9	8	7	1	1	5	4	0.202482	1	0.894632
BRF1	8	7	0	3	4	1	0.202482	1	3.04385
BRP44	8	7	0	0	7	0	0.202482	1	6.23832
C17orf95	8	7	0	3	4	2	0.202482	1	1.99574
C6orf97	8	7	0	0	7	3	0.202482	1	3.46574
CCDC25	8	7	0	0	7	8	0.202482	1	-0.726712
CCDC85B	8	7	3	4	0	0	0.202482	1	0
CISD3	8	7	0	0	7	4	0.202482	1	2.50133
CLIC1	8	7	1	1	5	4	0.202482	1	0.894632
CUL9	8	7	0	0	7	2	0.202482	1	4.49707
DCUN1D1	8	7	0	0	7	2	0.202482	1	4.49707
ELAVL1	8	7	0	0	7	7	0.202482	1	0
ELOVL1	8	7	0	0	7	3	0.202482	1	3.46574
FXR1	8	7	0	0	7	2	0.202482	1	4.49707
LOC100130557	8	7	4	3	0	0	0.202482	1	0
LOC100131496	8	7	6	1	0	0	0.202482	1	0
NAIF1	8	7	3	2	2	0	0.202482	1	1.74126
OBFC2A	8	7	3	0	4	1	0.202482	1	3.04385
PARP12	8	7	2	1	4	1	0.202482	1	3.04385
PRDX2	8	7	2	3	2	2	0.202482	1	0
RNF213	8	7	0	0	7	2	0.202482	1	4.49707
RTN4IP1	8	7	1	2	4	0	0.202482	1	3.737
SFRS2	8	7	1	5	1	1	0.202482	1	0
SLC27A5	8	7	3	0	4	2	0.202482	1	1.99574
SS18	8	7	0	0	7	3	0.202482	1	3.46574
TMEM63A	8	7	0	2	5	4	0.202482	1	0.894632
UBE2W	8	7	0	0	7	5	0.202482	1	1.60669
WDFY4	8	7	0	0	7	6	0.202482	1	0.775464
YAF2	8	7	0	0	7	5	0.202482	1	1.60669
YIPF6	8	7	0	0	7	3	0.202482	1	3.46574
CNTN1	113	65	0	0	65	58	0.203061	1	1.33723
CABLES1	41	26	1	2	23	23	0.203482	1	0
RCAN3	41	26	12	10	4	8	0.203482	1	-3.22804
EIF2AK4	25	17	1	0	16	7	0.204033	1	5.34233
PPRC1	25	17	0	1	16	13	0.204033	1	1.53283
SNTB1	25	17	1	0	16	15	0.204033	1	0.490299
ABL1	13	10	1	2	7	4	0.20574	1	2.50133
ACCN5	13	10	0	0	10	10	0.20574	1	0
ACSS3	13	10	0	0	10	3	0.20574	1	5.52277
C22orf39	13	10	4	3	3	2	0.20574	1	1.03133
CCNT1	13	10	0	2	8	5	0.20574	1	2.33341
CTNND1	13	10	1	0	9	9	0.20574	1	0
CUL7	13	10	0	1	9	3	0.20574	1	4.87643
DEAF1	13	10	3	2	5	7	0.20574	1	-1.60669
ERAP2	13	10	5	2	3	5	0.20574	1	-1.85904
GLG1	13	10	0	1	9	5	0.20574	1	3.01739
GRAMD3	13	10	0	0	10	2	0.20574	1	6.5541
HDAC8	13	10	0	1	9	5	0.20574	1	3.01739
NDUFAF1	13	10	1	2	7	2	0.20574	1	4.49707
NFATC4	13	10	3	3	4	3	0.20574	1	0.96441
PMP22	13	10	0	0	10	3	0.20574	1	5.52277
RPP25	13	10	6	4	0	0	0.20574	1	0
RUVBL1	13	10	0	0	10	10	0.20574	1	0
TMOD2	13	10	0	1	9	6	0.20574	1	2.18616
ZNF652	13	10	1	1	8	7	0.20574	1	0.726712
CACHD1	63	38	0	0	38	35	0.206687	1	0.836873
A2BP1	2	3	0	0	3	0	0.209532	1	2.77259
ABCD1	2	3	1	2	0	0	0.209532	1	0
ADRBK1	2	3	0	0	3	2	0.209532	1	1.03133
ALDH18A1	2	3	0	0	3	4	0.209532	1	-0.96441
AMDHD2	2	3	2	0	1	1	0.209532	1	0
AMPD2	2	3	3	0	0	0	0.209532	1	0
AMZ2P1	2	3	1	2	0	0	0.209532	1	0
ANKRD32	2	3	0	0	3	2	0.209532	1	1.03133
AP3B2	2	3	1	0	2	0	0.209532	1	1.74126
ARF4	2	3	0	0	3	1	0.209532	1	2.07944
BCAS2	2	3	1	0	2	0	0.209532	1	1.74126
[truncated: 10,413 more rows]

## Sheet: WNT positive reg. (high str.)
	Unsorted cells	Sorted cells					Derived from columns B and C		Derived from columns F and G
	All GT insertions in genes	Inactivating GT insertions in genes	Sense GT insetions in exons	Antisense GT insetions in exons	Sense GT insetions in introns	Antisense GT insetions in introns	p-value	FDR-corrected p-value	IGTIOB score
Total for dataset:	208561	31209	2761	2894	25554	23256
Gene
LRP6	38	159	10	8	141	6	7.46249e-103	6.55505e-99	29.97
TFAP4	79	116	13	9	94	70	3.46497e-52	1.52182e-48	3.70391
AXIN2	2	35	0	0	35	1	5.2533e-29	1.53817e-25	17.8334
DOT1L	31	51	2	0	49	4	3.85803e-25	8.47224e-22	18.3419
CTNNB1	4	29	0	2	27	3	5.05259e-22	8.87639e-19	13.2465
SETD1B	13	28	8	7	13	9	4.99438e-16	7.31178e-13	2.39881
DEPDC5	28	31	2	0	29	1	4.58177e-13	5.74946e-10	15.9962
HSP90B1	2	14	2	0	12	0	3.72158e-11	4.0863e-08	9.49144
MLL	5	15	4	2	9	2	4.23427e-10	4.13265e-07	5.90776
NEUROG2	5	14	1	12	1	0	2.44662e-09	2.14911e-06	0.693147
NPRL3	35	27	5	3	19	1	3.23387e-09	2.5824e-06	12.2542
CNOT2	12	17	0	1	16	1	9.57433e-09	7.00841e-06	10.8875
SMARCA4	40	27	0	0	27	5	2.44037e-08	1.64894e-05	11.3875
SPCS1	9	14	3	2	9	6	1.02635e-07	6.43958e-05	2.18616
SETDB1	21	19	2	1	16	1	1.24787e-07	7.30753e-05	10.8875
OSTC	4	10	2	0	8	0	8.46255e-07	0.000464594	6.96504
RNF146	2	8	0	0	8	0	2.90264e-06	0.00149981	6.96504
KCTD5	1	7	4	1	2	0	4.49054e-06	0.00215832	1.74126
ZFP36L2	4	9	5	4	0	1	4.66851e-06	0.00215832	-0.693147
CXXC1	3	8	2	0	6	0	9.41537e-06	0.00413523	5.46286
CNOT3	7	10	2	3	5	3	1.12935e-05	0.00472389	1.85904
DIS3L2	6	9	0	0	9	2	2.55119e-05	0.0100936	5.90776
MALAT1	93	34	14	20	0	0	2.6429e-05	0.0100936	0
NKX2-2	21	14	4	8	2	2	6.25733e-05	0.0229018	0
ABHD14B	10	10	5	2	3	1	7.38061e-05	0.0259325	2.07944
FGGY	25	15	0	0	15	4	8.33147e-05	0.0281476	7.35336
SFRS1	29	16	0	6	10	4	0.000102564	0.0333675	4.55836
TRIP12	26	15	2	0	13	3	0.000115605	0.0343572	7.27524
GTF2I	33	17	1	0	16	6	0.000119331	0.0343572	6.11779
HDX	11	10	3	5	2	2	0.000124428	0.0343572	0
DNAJC30	4	7	2	5	0	0	0.000129074	0.0343572	0
SC65	4	7	1	3	3	0	0.000129074	0.0343572	2.77259
TBX3	4	7	1	6	0	1	0.000129074	0.0343572	-0.693147
NONO	20	13	1	0	12	0	0.00013715	0.035433	9.49144
REEP1	5	7	0	0	7	1	0.000274787	0.0689637	5.54518
TBCD	29	15	1	0	14	5	0.000285662	0.0697016	5.94842
OGFOD2	19	12	1	9	2	0	0.000299798	0.0711738	1.74126
ARID1A	13	10	3	1	6	1	0.000314905	0.0727927	4.76971
LOC81691	2	5	0	1	4	2	0.000624116	0.139957	1.99574
ZCCHC8	32	15	0	0	15	8	0.000637329	0.139957	4.12532
GCHFR	9	8	0	0	8	0	0.00066817	0.143151	6.96504
FRAT2	12	9	4	5	0	0	0.00071628	0.149805	0
TCF7L2	61	22	2	10	10	10	0.000751137	0.153442	0
C10orf95	22	12	7	4	1	0	0.000799612	0.159355	0.693147
CREBBP	33	15	0	0	15	6	0.000816369	0.159355	5.62749
RCAN3	41	17	8	8	1	2	0.000857293	0.163706	-1.04811
INPPL1	7	7	0	1	6	4	0.000937743	0.175258	1.72586
CNST	10	8	1	0	7	0	0.00106575	0.188448	6.23832
INPP4A	10	8	0	0	8	0	0.00106575	0.188448	6.96504
CDH13	13	9	0	0	9	4	0.00107268	0.188448	3.91202
CABLES2	1	4	2	1	1	0	0.00128608	0.209203	0.693147
FIBP	1	4	1	3	0	2	0.00128608	0.209203	-1.74126
NUDT7	1	4	0	0	4	0	0.00128608	0.209203	3.737
SESN2	1	4	0	0	4	1	0.00128608	0.209203	3.04385
LONRF2	11	8	5	2	1	0	0.00163163	0.255933	0.693147
NCRNA00095	11	8	2	6	0	0	0.00163163	0.255933	0
ADNP	41	16	3	0	13	6	0.00198306	0.303257	4.58497
CNRIP1	0	3	0	0	3	1	0.0022056	0.303257	2.07944
FZD2	0	3	2	1	0	0	0.0022056	0.303257	0
GABBR1	0	3	2	0	1	1	0.0022056	0.303257	0
PLXND1	0	3	3	0	0	0	0.0022056	0.303257	0
R3HDM2	0	3	0	0	3	0	0.0022056	0.303257	2.77259
SERINC4	0	3	1	0	2	0	0.0022056	0.303257	1.74126
SOX21	15	9	6	3	0	0	0.00220952	0.303257	0
AHSA2	9	7	5	2	0	0	0.0024646	0.333062	0
C1orf213	56	19	11	8	0	0	0.00292374	0.37971	0
CPA6	65	21	0	0	21	20	0.00294153	0.37971	0.411784
MAN1A2	4	5	2	1	2	2	0.00298269	0.37971	0
PDIA3	4	5	1	0	4	0	0.00298269	0.37971	3.737
MLLT6	16	9	2	2	5	1	0.0030572	0.383635	3.93848
TSC1	13	8	0	0	8	1	0.00345385	0.38692	6.27189
HOXA9	2	4	4	0	0	0	0.00345838	0.38692	0
KCNK1	2	4	0	0	4	2	0.00345838	0.38692	1.99574
TUG1	2	4	1	3	0	0	0.00345838	0.38692	0
MECOM	250	57	0	0	57	26	0.00365074	0.38692	8.11466
GPR162	7	6	2	2	2	0	0.0036736	0.38692	1.74126
LOC400657	7	6	1	5	0	1	0.0036736	0.38692	-0.693147
PCBP1	7	6	1	5	0	0	0.0036736	0.38692	0
TSC2	7	6	1	0	5	3	0.0036736	0.38692	1.85904
CLU	10	7	0	1	6	6	0.0037221	0.38692	0
GMPR2	10	7	5	2	0	0	0.0037221	0.38692	0
MEN1	10	7	1	5	1	3	0.0037221	0.38692	-2.07944
TRIM8	10	7	3	3	1	2	0.0037221	0.38692	-1.04811
UBL3	10	7	1	1	5	5	0.0037221	0.38692	0
PGPEP1	24	11	5	5	1	1	0.0037441	0.38692	0
ODZ1	41	15	1	1	13	5	0.00441018	0.450453	5.4162
MAGIX	25	11	6	3	2	1	0.0047661	0.464734	1.04811
SATB2	25	11	1	3	7	8	0.0047661	0.464734	-0.726712
HNRNPA1	29	12	1	1	10	6	0.00481415	0.464734	2.83249
HNRPA1L-2	29	12	1	1	10	6	0.00481415	0.464734	2.83249
GANAB	14	8	0	0	8	1	0.00481452	0.464734	6.27189
ZFHX3	260	58	0	0	58	30	0.00501832	0.47914	6.97405
C16orf5	5	5	0	0	5	2	0.00532755	0.487471	2.89037
FMNL2	5	5	0	1	4	0	0.00532755	0.487471	3.737
GGA3	5	5	1	1	3	0	0.00532755	0.487471	2.77259
RBM7	5	5	0	1	4	0	0.00532755	0.487471	3.737
GPR108	11	7	1	2	4	4	0.0054125	0.488336	0
PDXK	18	9	0	1	8	6	0.00550378	0.488336	1.50218
RP1-177G6.2	18	9	1	2	6	0	0.00550378	0.488336	5.46286
MAB21L1	8	6	4	2	0	0	0.0057255	0.502928	0
LOC388796	22	10	1	2	7	2	0.00586999	0.510515	4.49707
BCL9	80	23	0	0	23	5	0.00630726	0.543167	9.93963
BRD9	15	8	2	2	4	3	0.00655036	0.555	0.96441
TBC1D23	48	16	0	0	16	6	0.00689642	0.555	6.11779
FLAD1	19	9	7	2	0	1	0.00718765	0.555	-0.693147
SMG1	19	9	2	5	2	1	0.00718765	0.555	1.04811
THBS3	19	9	3	2	4	3	0.00718765	0.555	0.96441
APBA3	3	4	0	0	4	2	0.00723741	0.555	1.99574
ARHGEF10	3	4	0	0	4	1	0.00723741	0.555	3.04385
BZW2	3	4	0	1	3	1	0.00723741	0.555	2.07944
C19orf61	3	4	0	0	4	1	0.00723741	0.555	3.04385
CBX8	3	4	1	1	2	1	0.00723741	0.555	1.04811
LYRM5	3	4	0	0	4	0	0.00723741	0.555	3.737
ARL15	12	7	0	0	7	4	0.00761801	0.555	2.50133
MBLAC1	12	7	3	4	0	1	0.00761801	0.555	-0.693147
PIK3R1	12	7	0	0	7	0	0.00761801	0.555	6.23832
CITED1	1	3	0	1	2	0	0.00796106	0.555	1.74126
EFCAB7	1	3	0	0	3	0	0.00796106	0.555	2.77259
GPR144	1	3	1	2	0	0	0.00796106	0.555	0
IL7R	1	3	0	0	3	1	0.00796106	0.555	2.07944
PRKACA	1	3	2	0	1	0	0.00796106	0.555	0.693147
SYT17	1	3	1	0	2	1	0.00796106	0.555	1.04811
TBC1D20	1	3	1	1	1	1	0.00796106	0.555	0
TCF7	1	3	0	2	1	1	0.00796106	0.555	0
TREX1	1	3	1	2	0	0	0.00796106	0.555	0
VPS33B	1	3	0	0	3	1	0.00796106	0.555	2.07944
BTBD19	9	6	3	2	1	0	0.00850181	0.555486	0.693147
FLJ35776	9	6	3	1	2	0	0.00850181	0.555486	1.74126
IL17RE	16	8	3	5	0	0	0.00872078	0.555486	0
ACD	6	5	3	1	1	0	0.00872689	0.555486	0.693147
C1orf190	6	5	0	1	4	3	0.00872689	0.555486	0.96441
DHRS3	6	5	3	1	1	1	0.00872689	0.555486	0
FKBPL	6	5	3	2	0	0	0.00872689	0.555486	0
LOC150197	6	5	3	2	0	0	0.00872689	0.555486	0
RANBP6	6	5	3	2	0	0	0.00872689	0.555486	0
RIMS1	6	5	0	0	5	1	0.00872689	0.555486	3.93848
TFR2	6	5	1	1	3	1	0.00872689	0.555486	2.07944
TMED10	6	5	0	0	5	0	0.00872689	0.555486	4.63163
LOC100216545	32	12	6	6	0	0	0.00886808	0.556409	0
NUAK1	32	12	0	0	12	5	0.00886808	0.556409	4.85981
NAV2	28	11	0	0	11	4	0.00919594	0.572888	5.1713
MTF2	24	10	0	0	10	4	0.00935137	0.578468	4.55836
DENND5B	37	13	5	5	3	1	0.0100675	0.614115	2.07944
KEAP1	37	13	1	2	10	3	0.0100675	0.614115	5.52277
ANK1	13	7	0	0	7	2	0.0104218	0.631346	4.49707
COMT	70	20	0	0	20	11	0.0109323	0.657734	4.46421
MCEE	17	8	0	0	8	2	0.011386	0.658741	5.22378
MKNK2	25	10	4	1	5	6	0.0115943	0.658741	-0.831229
CLASP1	21	9	0	0	9	5	0.0117011	0.658741	3.01739
FKBP10	21	9	3	2	4	7	0.0117011	0.658741	-2.50133
SEMA3C	21	9	0	0	9	2	0.0117011	0.658741	5.90776
FERMT1	66	19	2	0	17	13	0.0121184	0.658741	2.00481
RNF43	10	6	1	5	0	3	0.0121241	0.658741	-2.77259
SCAMP1	10	6	0	0	6	2	0.0121241	0.658741	3.7216
ARL2BP	4	4	0	0	4	1	0.0129898	0.658741	3.04385
C4orf49	4	4	2	1	1	0	0.0129898	0.658741	0.693147
CCDC66	4	4	0	0	4	1	0.0129898	0.658741	3.04385
CDNF	4	4	0	0	4	1	0.0129898	0.658741	3.04385
COX6B1	4	4	0	0	4	0	0.0129898	0.658741	3.737
OTUD4	4	4	0	1	3	2	0.0129898	0.658741	1.03133
SPRY1	4	4	0	0	4	1	0.0129898	0.658741	3.04385
TUSC1	4	4	1	3	0	0	0.0129898	0.658741	0
UCP2	4	4	0	0	4	0	0.0129898	0.658741	3.737
CNTN6	57	17	1	1	15	7	0.0130468	0.658741	4.85203
PLXDC2	154	36	1	1	34	17	0.0130647	0.658741	6.18375
CASD1	7	5	0	0	5	2	0.0133733	0.658741	2.89037
CES2	7	5	2	2	1	0	0.0133733	0.658741	0.693147
GGT7	7	5	1	1	3	1	0.0133733	0.658741	2.07944
SLC25A43	7	5	1	0	4	1	0.0133733	0.658741	3.04385
SLC6A6	7	5	0	2	3	1	0.0133733	0.658741	2.07944
FAM59A	30	11	0	0	11	1	0.0135713	0.658741	8.21515
CCBL1	14	7	1	0	6	3	0.0139058	0.658741	2.69027
PNMA1	14	7	4	3	0	0	0.0139058	0.658741	0
FBXW7	53	16	0	1	15	3	0.0143982	0.658741	8.31777
SYNE1	31	11	0	0	11	5	0.0162741	0.658741	4.27667
TPM4	40	13	0	0	13	10	0.0164646	0.658741	1.75247
SCMH1	11	6	0	0	6	4	0.0167071	0.658741	1.72586
SYP	11	6	1	1	4	3	0.0167071	0.658741	0.96441
ANKRD52	0	2	0	0	2	1	0.0169436	0.658741	1.04811
ARAP1	0	2	1	0	1	2	0.0169436	0.658741	-1.04811
C2orf29	0	2	1	0	1	0	0.0169436	0.658741	0.693147
CDHR5	0	2	1	1	0	0	0.0169436	0.658741	0
COPA	0	2	0	0	2	1	0.0169436	0.658741	1.04811
CYP4F3	0	2	1	0	1	0	0.0169436	0.658741	0.693147
ETV4	0	2	0	0	2	1	0.0169436	0.658741	1.04811
FSCB	0	2	1	1	0	0	0.0169436	0.658741	0
GPR88	0	2	0	0	2	0	0.0169436	0.658741	1.74126
GPX4	0	2	1	0	1	0	0.0169436	0.658741	0.693147
GRM3	0	2	0	0	2	0	0.0169436	0.658741	1.74126
HIST1H2AK	0	2	1	1	0	0	0.0169436	0.658741	0
ISG20L2	0	2	0	2	0	0	0.0169436	0.658741	0
MAPRE3	0	2	0	0	2	0	0.0169436	0.658741	1.74126
PFKFB2	0	2	1	0	1	0	0.0169436	0.658741	0.693147
RASGEF1C	0	2	0	0	2	1	0.0169436	0.658741	1.04811
RFNG	0	2	0	0	2	0	0.0169436	0.658741	1.74126
SBF1	0	2	0	0	2	0	0.0169436	0.658741	1.74126
SCN2B	0	2	2	0	0	0	0.0169436	0.658741	0
SLC38A2	0	2	0	1	1	0	0.0169436	0.658741	0.693147
SLC4A3	0	2	1	1	0	0	0.0169436	0.658741	0
TBXA2R	0	2	0	0	2	0	0.0169436	0.658741	1.74126
TIMM17B	0	2	1	0	1	1	0.0169436	0.658741	0
TRPM5	0	2	0	0	2	0	0.0169436	0.658741	1.74126
VGF	0	2	1	1	0	0	0.0169436	0.658741	0
ZDHHC4	0	2	1	0	1	2	0.0169436	0.658741	-1.04811
ZFP41	0	2	0	0	2	0	0.0169436	0.658741	1.74126
CLN6	27	10	1	0	9	5	0.0172663	0.658741	3.01739
FLJ13224	27	10	8	2	0	0	0.0172663	0.658741	0
NUAK2	27	10	1	2	7	8	0.0172663	0.658741	-0.726712
ACAD9	2	3	1	0	2	2	0.0179735	0.658741	0
ADAMTS18	2	3	0	0	3	0	0.0179735	0.658741	2.77259
C11orf9	2	3	1	0	2	0	0.0179735	0.658741	1.74126
C2orf47	2	3	0	1	2	0	0.0179735	0.658741	1.74126
CTSB	2	3	0	0	3	2	0.0179735	0.658741	1.03133
ERICH1	2	3	0	0	3	2	0.0179735	0.658741	1.03133
FKBP4	2	3	0	1	2	0	0.0179735	0.658741	1.74126
FLJ45983	2	3	1	2	0	0	0.0179735	0.658741	0
IKBKB	2	3	0	1	2	2	0.0179735	0.658741	0
JUND	2	3	2	1	0	0	0.0179735	0.658741	0
KBTBD10	2	3	0	0	3	1	0.0179735	0.658741	2.07944
KRBA1	2	3	0	0	3	0	0.0179735	0.658741	2.77259
KYNU	2	3	0	0	3	0	0.0179735	0.658741	2.77259
LAMA4	2	3	1	0	2	1	0.0179735	0.658741	1.04811
LGALS1	2	3	0	0	3	0	0.0179735	0.658741	2.77259
LIPG	2	3	0	1	2	0	0.0179735	0.658741	1.74126
MOCOS	2	3	0	0	3	1	0.0179735	0.658741	2.07944
MTL5	2	3	0	0	3	0	0.0179735	0.658741	2.77259
NR2C1	2	3	0	0	3	0	0.0179735	0.658741	2.77259
PPM1L	2	3	1	1	1	0	0.0179735	0.658741	0.693147
PRDX1	2	3	1	1	1	1	0.0179735	0.658741	0
RHBDF1	2	3	0	0	3	0	0.0179735	0.658741	2.77259
RINL	2	3	1	1	1	0	0.0179735	0.658741	0.693147
SCARF1	2	3	0	1	2	0	0.0179735	0.658741	1.74126
SIN3B	2	3	0	1	2	1	0.0179735	0.658741	1.04811
STAM2	2	3	1	2	0	1	0.0179735	0.658741	-0.693147
ZNF296	2	3	0	1	2	0	0.0179735	0.658741	1.74126
ZNF593	2	3	1	1	1	0	0.0179735	0.658741	0.693147
GSS	23	9	0	0	9	1	0.0180474	0.658741	6.95587
MYO19	23	9	0	3	6	3	0.0180474	0.658741	2.69027
PLEKHG4	23	9	5	4	0	0	0.0180474	0.658741	0
E2F3	15	7	2	4	1	1	0.0181484	0.658741	0
FAT1	15	7	0	0	7	1	0.0181484	0.658741	5.54518
TMCO4	15	7	0	0	7	2	0.0181484	0.658741	4.49707
DDX6	19	8	1	0	7	0	0.0184382	0.663775	6.23832
KIAA0195	19	8	0	0	8	3	0.0184382	0.663775	4.19245
NSD1	65	18	8	3	7	3	0.0193426	0.67747	3.46574
INO80D	8	5	1	0	4	1	0.0194356	0.67747	3.04385
LOC100128822	8	5	2	3	0	0	0.0194356	0.67747	0
OTUB1	8	5	2	2	1	0	0.0194356	0.67747	0.693147
PHTF2	8	5	0	1	4	0	0.0194356	0.67747	3.737
PRDXDD1P	8	5	2	3	0	0	0.0194356	0.67747	0
RBM3	8	5	0	0	5	2	0.0194356	0.67747	2.89037
TNRC6A	8	5	1	0	4	3	0.0194356	0.67747	0.96441
ZNF292	46	14	0	0	14	4	0.0201172	0.68815	6.84306
GRIN2D	28	10	0	0	10	3	0.020767	0.68815	5.52277
UHRF1	28	10	1	3	6	3	0.020767	0.68815	2.69027
PANK2	37	12	2	1	9	2	0.0209754	0.68815	5.90776
A4GALT	5	4	0	0	4	2	0.0209955	0.68815	1.99574
C16orf71	5	4	0	0	4	0	0.0209955	0.68815	3.737
CACYBP	5	4	0	0	4	2	0.0209955	0.68815	1.99574
EIF3L	5	4	0	0	4	1	0.0209955	0.68815	3.04385
GPR128	5	4	0	0	4	1	0.0209955	0.68815	3.04385
GPX1	5	4	1	3	0	0	0.0209955	0.68815	0
ISLR2	5	4	1	3	0	0	0.0209955	0.68815	0
LOC100130581	5	4	1	1	2	0	0.0209955	0.68815	1.74126
MEPCE	5	4	4	0	0	0	0.0209955	0.68815	0
PHLPP2	5	4	0	0	4	1	0.0209955	0.68815	3.04385
TAF3	5	4	0	0	4	2	0.0209955	0.68815	1.99574
ZNF598	5	4	0	0	4	1	0.0209955	0.68815	3.04385
KRT10	24	9	0	1	8	0	0.0220195	0.716644	6.96504
C12orf73	12	6	2	0	4	0	0.0223543	0.716644	3.737
CAGE1	12	6	0	2	4	0	0.0223543	0.716644	3.737
IARS	12	6	2	0	4	5	0.0223543	0.716644	-0.894632
PC	12	6	0	0	6	3	0.0223543	0.716644	2.69027
WDR90	12	6	3	2	1	1	0.0223543	0.716644	0
HMGA2	33	11	0	0	11	3	0.0228569	0.718262	6.13571
ABI1	20	8	0	0	8	5	0.0229384	0.718262	2.33341
FAM171A1	20	8	0	0	8	5	0.0229384	0.718262	2.33341
MPG	20	8	1	2	5	1	0.0229384	0.718262	3.93848
PFKFB3	20	8	0	0	8	4	0.0229384	0.718262	3.22804
RHOA	20	8	4	1	3	0	0.0229384	0.718262	2.77259
ABCB9	16	7	5	1	1	1	0.0232225	0.718262	0
CLEC6A	16	7	0	0	7	11	0.0232225	0.718262	-2.66997
MMP16	16	7	1	0	6	4	0.0232225	0.718262	1.72586
SLC7A5	16	7	0	0	7	3	0.0232225	0.718262	3.46574
MAP4	77	20	0	0	20	7	0.024011	0.740045	7.13418
HSPC159	72	19	4	9	6	4	0.0241955	0.743125	1.72586
C14orf176	29	10	2	2	6	3	0.0247571	0.752478	2.69027
HIRIP3	29	10	5	5	0	1	0.0247571	0.752478	-0.693147
KIAA0101	29	10	4	3	3	6	0.0247571	0.752478	-2.69027
KIF9	43	13	0	1	12	8	0.0255508	0.759904	2.5264
PRMT7	25	9	0	0	9	5	0.02658	0.759904	3.01739
CDC7	9	5	1	1	3	1	0.0270524	0.759904	2.07944
EEA1	9	5	0	1	4	3	0.0270524	0.759904	0.96441
LPPR4	9	5	0	0	5	1	0.0270524	0.759904	3.93848
MAPK1	9	5	0	0	5	1	0.0270524	0.759904	3.93848
SLC26A9	9	5	0	1	4	2	0.0270524	0.759904	1.99574
STT3A	9	5	0	1	4	1	0.0270524	0.759904	3.04385
TAPBP	9	5	1	2	2	1	0.0270524	0.759904	1.04811
HNRNPD	21	8	0	0	8	2	0.0281576	0.759904	5.22378
LOC100131193	21	8	1	2	5	2	0.0281576	0.759904	2.89037
ALKBH2	13	6	1	2	3	1	0.0291557	0.759904	2.07944
FLJ39582	13	6	3	3	0	0	0.0291557	0.759904	0
SOX12	13	6	5	1	0	0	0.0291557	0.759904	0
ZCCHC3	13	6	1	5	0	0	0.0291557	0.759904	0
ZCCHC6	13	6	1	4	1	0	0.0291557	0.759904	0.693147
BAT4	17	7	3	4	0	1	0.0291938	0.759904	-0.693147
CCDC111	17	7	0	0	7	4	0.0291938	0.759904	2.50133
IMP3	30	10	7	3	0	0	0.0292688	0.759904	0
NME1-NME2	30	10	0	0	10	4	0.0292688	0.759904	4.55836
THAP4	30	10	0	1	9	3	0.0292688	0.759904	4.87643
SUGT1P1	54	15	0	0	15	10	0.0302729	0.759904	2.795
BAG1	6	4	0	0	4	1	0.0314407	0.759904	3.04385
C12orf52	6	4	0	3	1	0	0.0314407	0.759904	0.693147
C17orf82	6	4	1	3	0	0	0.0314407	0.759904	0
CAPRIN2	6	4	1	2	1	0	0.0314407	0.759904	0.693147
CCDC86	6	4	2	1	1	0	0.0314407	0.759904	0.693147
FA2H	6	4	0	0	4	0	0.0314407	0.759904	3.737
GAS6	6	4	0	0	4	1	0.0314407	0.759904	3.04385
HSPH1	6	4	0	1	3	0	0.0314407	0.759904	2.77259
LRSAM1	6	4	2	1	1	1	0.0314407	0.759904	0
PDLIM2	6	4	1	2	1	0	0.0314407	0.759904	0.693147
PSMB7	6	4	0	0	4	0	0.0314407	0.759904	3.737
RNF160	6	4	0	0	4	1	0.0314407	0.759904	3.04385
SPTBN4	6	4	1	1	2	0	0.0314407	0.759904	1.74126
TFB1M	6	4	0	0	4	3	0.0314407	0.759904	0.96441
TRPV3	6	4	2	1	1	1	0.0314407	0.759904	0
ZFP91	6	4	0	0	4	2	0.0314407	0.759904	1.99574
ZFP91-CNTF	6	4	0	0	4	2	0.0314407	0.759904	1.99574
ABCA3	26	9	0	0	9	3	0.0317674	0.759904	4.87643
COPZ1	26	9	0	0	9	4	0.0317674	0.759904	3.91202
HOXB2	26	9	2	5	2	2	0.0317674	0.759904	0
PAN2	26	9	3	3	3	1	0.0317674	0.759904	2.07944
ZRANB3	26	9	0	0	9	5	0.0317674	0.759904	3.01739
AGRN	3	3	1	0	2	3	0.0324887	0.759904	-1.03133
C12orf48	3	3	0	0	3	3	0.0324887	0.759904	0
C21orf63	3	3	1	0	2	1	0.0324887	0.759904	1.04811
C6orf124	3	3	1	1	1	0	0.0324887	0.759904	0.693147
C8orf39	3	3	2	1	0	0	0.0324887	0.759904	0
DMWD	3	3	0	1	2	1	0.0324887	0.759904	1.04811
FAIM	3	3	1	1	1	2	0.0324887	0.759904	-1.04811
GALK1	3	3	1	0	2	0	0.0324887	0.759904	1.74126
GALNS	3	3	0	0	3	0	0.0324887	0.759904	2.77259
GNPDA1	3	3	0	0	3	1	0.0324887	0.759904	2.07944
HSD17B8	3	3	1	1	1	0	0.0324887	0.759904	0.693147
LRFN4	3	3	0	3	0	0	0.0324887	0.759904	0
MAP2K7	3	3	0	1	2	1	0.0324887	0.759904	1.04811
MPZL3	3	3	0	1	2	0	0.0324887	0.759904	1.74126
NCEH1	3	3	0	0	3	0	0.0324887	0.759904	2.77259
NTHL1	3	3	0	0	3	0	0.0324887	0.759904	2.77259
NUDCD3	3	3	0	1	2	0	0.0324887	0.759904	1.74126
PABPC4L	3	3	0	3	0	1	0.0324887	0.759904	-0.693147
PQBP1	3	3	1	1	1	1	0.0324887	0.759904	0
PXMP4	3	3	0	1	2	1	0.0324887	0.759904	1.04811
SLC7A2	3	3	0	1	2	1	0.0324887	0.759904	1.04811
SNX8	3	3	0	0	3	0	0.0324887	0.759904	2.77259
TWF1	3	3	0	0	3	0	0.0324887	0.759904	2.77259
ZMAT5	3	3	0	1	2	0	0.0324887	0.759904	1.74126
ZNF326	3	3	0	0	3	0	0.0324887	0.759904	2.77259
TICAM1	40	12	5	5	2	1	0.0325213	0.759904	1.04811
ANK3	75	19	2	2	15	8	0.0329146	0.759904	4.12532
MUM1	65	17	2	1	14	7	0.0337664	0.759904	4.34173
FZD3	22	8	0	0	8	1	0.0341417	0.759904	6.27189
NME1	22	8	1	1	6	2	0.0341417	0.759904	3.7216
PIR	22	8	0	0	8	1	0.0341417	0.759904	6.27189
PROCA1	22	8	0	0	8	1	0.0341417	0.759904	6.27189
SPAG16	22	8	0	0	8	5	0.0341417	0.759904	2.33341
SPATS2	22	8	2	0	6	6	0.0341417	0.759904	0
CALCR	31	10	0	0	10	9	0.0343325	0.759904	0.646333
PARP16	31	10	1	0	9	5	0.0343325	0.759904	3.01739
CLK3	18	7	2	5	0	1	0.036119	0.759904	-0.693147
KDM6A	18	7	0	0	7	1	0.036119	0.759904	5.54518
SETD3	18	7	0	1	6	2	0.036119	0.759904	3.7216
TMEM80	18	7	0	0	7	4	0.036119	0.759904	2.50133
XKR3	18	7	0	0	7	4	0.036119	0.759904	2.50133
C9orf43	10	5	0	4	1	0	0.0363276	0.759904	0.693147
FAM120A	10	5	1	1	3	3	0.0363276	0.759904	0
FZD7	10	5	2	3	0	0	0.0363276	0.759904	0
KCNG3	10	5	2	1	2	1	0.0363276	0.759904	1.04811
MDM4	10	5	1	0	4	2	0.0363276	0.759904	1.99574
PDE3A	10	5	0	0	5	2	0.0363276	0.759904	2.89037
RNF38	10	5	1	1	3	2	0.0363276	0.759904	1.03133
SLC25A10	10	5	1	0	4	2	0.0363276	0.759904	1.99574
ZNF592	10	5	0	0	5	0	0.0363276	0.759904	4.63163
C12orf66	14	6	1	0	5	4	0.0371846	0.759904	0.894632
DNASE1L1	14	6	1	1	4	3	0.0371846	0.759904	0.96441
FAM120AOS	14	6	2	3	1	1	0.0371846	0.759904	0
FOXO1	14	6	0	0	6	4	0.0371846	0.759904	1.72586
NTRK2	14	6	0	0	6	2	0.0371846	0.759904	3.7216
SPIN4	14	6	3	3	0	0	0.0371846	0.759904	0
STRN4	14	6	0	0	6	5	0.0371846	0.759904	0.831229
TET2	14	6	2	2	2	1	0.0371846	0.759904	1.04811
SAPS3	41	12	0	0	12	2	0.0372208	0.759904	7.75018
KIAA1217	27	9	0	0	9	7	0.0376163	0.759904	1.4107
SEMA3A	27	9	0	0	9	5	0.0376163	0.759904	3.01739
LRRC27	87	21	2	5	14	7	0.0380354	0.759904	4.34173
C9orf86	56	15	0	2	13	11	0.0381331	0.759904	1.13953
TRIM22	32	10	1	0	9	7	0.0399758	0.759904	1.4107
WDR20	170	36	0	1	35	19	0.0401318	0.759904	5.57918
C19orf2	72	18	4	1	13	15	0.0407377	0.759904	-1.04253
EFCAB5	23	8	0	0	8	6	0.040931	0.759904	1.50218
PRKCB	23	8	0	0	8	6	0.040931	0.759904	1.50218
RUNX1T1	23	8	0	0	8	1	0.040931	0.759904	6.27189
LIMA1	37	11	3	5	3	3	0.041495	0.759904	0
IGF2BP1	62	16	4	4	8	6	0.0421086	0.759904	1.50218
TMTC2	62	16	0	0	16	14	0.0421086	0.759904	1.0006
CDC42EP1	47	13	0	0	13	11	0.042781	0.759904	1.13953
SCAND2	47	13	5	2	6	5	0.042781	0.759904	0.831229
BMF	143	31	9	9	13	7	0.0428555	0.759904	3.8095
CNOT4	19	7	0	0	7	4	0.044045	0.759904	2.50133
GLRB	19	7	1	1	5	1	0.044045	0.759904	3.93848
HAGHL	19	7	1	2	4	1	0.044045	0.759904	3.04385
LAMC1	19	7	1	1	5	4	0.044045	0.759904	0.894632
ZBTB45	19	7	1	2	4	5	0.044045	0.759904	-0.894632
ITPKB	28	9	2	1	6	4	0.0441574	0.759904	1.72586
MAGI1	28	9	0	3	6	3	0.0441574	0.759904	2.69027
AGPAT4	7	4	0	0	4	0	0.0444201	0.759904	3.737
BAX	7	4	0	0	4	1	0.0444201	0.759904	3.04385
BMI1	7	4	1	0	3	2	0.0444201	0.759904	1.03133
CCM2	7	4	0	0	4	2	0.0444201	0.759904	1.99574
CFTR	7	4	0	0	4	1	0.0444201	0.759904	3.04385
COL18A1	7	4	0	0	4	1	0.0444201	0.759904	3.04385
CSNK2A1	7	4	0	0	4	0	0.0444201	0.759904	3.737
DPYSL5	7	4	0	0	4	4	0.0444201	0.759904	0
ESR2	7	4	3	0	1	0	0.0444201	0.759904	0.693147
IMPDH2	7	4	0	0	4	1	0.0444201	0.759904	3.04385
LMAN1	7	4	1	0	3	2	0.0444201	0.759904	1.03133
LRRK2	7	4	0	2	2	0	0.0444201	0.759904	1.74126
NDST4	7	4	0	0	4	2	0.0444201	0.759904	1.99574
NUP214	7	4	0	0	4	3	0.0444201	0.759904	0.96441
PIGS	7	4	0	2	2	1	0.0444201	0.759904	1.04811
SIRT5	7	4	0	3	1	2	0.0444201	0.759904	-1.04811
USHBP1	7	4	0	0	4	2	0.0444201	0.759904	1.99574
YWHAH	7	4	0	0	4	2	0.0444201	0.759904	1.99574
ZNF638	7	4	0	0	4	0	0.0444201	0.759904	3.737
FBXL17	33	10	0	1	9	4	0.0462231	0.759904	3.91202
R3HDM1	33	10	0	0	10	8	0.0462231	0.759904	1.33032
ADAM32	1	2	0	0	2	0	0.0464197	0.759904	1.74126
AKR1B1	1	2	0	0	2	0	0.0464197	0.759904	1.74126
ASB8	1	2	0	0	2	1	0.0464197	0.759904	1.04811
BHLHE22	1	2	0	2	0	0	0.0464197	0.759904	0
BNIPL	1	2	0	2	0	0	0.0464197	0.759904	0
C12orf29	1	2	0	0	2	0	0.0464197	0.759904	1.74126
C21orf90	1	2	0	2	0	0	0.0464197	0.759904	0
C4orf3	1	2	0	0	2	0	0.0464197	0.759904	1.74126
C6orf145	1	2	1	1	0	0	0.0464197	0.759904	0
CCDC102A	1	2	0	0	2	0	0.0464197	0.759904	1.74126
CCDC125	1	2	0	0	2	0	0.0464197	0.759904	1.74126
CDK16	1	2	0	0	2	1	0.0464197	0.759904	1.04811
CHST9	1	2	0	0	2	0	0.0464197	0.759904	1.74126
CLN5	1	2	0	1	1	1	0.0464197	0.759904	0
CMAS	1	2	0	1	1	0	0.0464197	0.759904	0.693147
COX6B2	1	2	1	1	0	0	0.0464197	0.759904	0
DDX60	1	2	0	0	2	0	0.0464197	0.759904	1.74126
DEM1	1	2	0	0	2	1	0.0464197	0.759904	1.04811
DMRTA2	1	2	0	2	0	1	0.0464197	0.759904	-0.693147
DTX3L	1	2	0	1	1	0	0.0464197	0.759904	0.693147
EIF1B	1	2	1	0	1	0	0.0464197	0.759904	0.693147
ELP2	1	2	0	0	2	0	0.0464197	0.759904	1.74126
FBXL18	1	2	0	0	2	2	0.0464197	0.759904	0
FBXW12	1	2	1	0	1	0	0.0464197	0.759904	0.693147
FGFR1OP	1	2	0	1	1	0	0.0464197	0.759904	0.693147
GLB1L3	1	2	1	0	1	0	0.0464197	0.759904	0.693147
GP5	1	2	1	1	0	0	0.0464197	0.759904	0
IL13RA1	1	2	0	0	2	0	0.0464197	0.759904	1.74126
IMPA1	1	2	0	0	2	0	0.0464197	0.759904	1.74126
ING5	1	2	0	0	2	0	0.0464197	0.759904	1.74126
INSM1	1	2	2	0	0	0	0.0464197	0.759904	0
KIAA0317	1	2	0	0	2	1	0.0464197	0.759904	1.04811
KLHL29	1	2	0	0	2	1	0.0464197	0.759904	1.04811
KTI12	1	2	0	2	0	0	0.0464197	0.759904	0
LAG3	1	2	1	1	0	0	0.0464197	0.759904	0
LEMD1	1	2	0	0	2	0	0.0464197	0.759904	1.74126
LOC100286938	1	2	1	1	0	0	0.0464197	0.759904	0
LOC253039	1	2	1	1	0	0	0.0464197	0.759904	0
PAQR8	1	2	0	0	2	0	0.0464197	0.759904	1.74126
PIM2	1	2	0	2	0	0	0.0464197	0.759904	0
PJA1	1	2	0	0	2	0	0.0464197	0.759904	1.74126
PLXNA4	1	2	0	0	2	0	0.0464197	0.759904	1.74126
PPIF	1	2	0	1	1	1	0.0464197	0.759904	0
PPP1R15A	1	2	2	0	0	0	0.0464197	0.759904	0
PPP2R1B	1	2	0	0	2	0	0.0464197	0.759904	1.74126
RNF128	1	2	1	0	1	0	0.0464197	0.759904	0.693147
RPGR	1	2	0	0	2	0	0.0464197	0.759904	1.74126
RPS6KA4	1	2	0	1	1	0	0.0464197	0.759904	0.693147
RRS1	1	2	0	2	0	0	0.0464197	0.759904	0
S100A13	1	2	1	1	0	1	0.0464197	0.759904	-0.693147
SLC12A5	1	2	0	1	1	1	0.0464197	0.759904	0
SNORD60	1	2	0	2	0	0	0.0464197	0.759904	0
SPTLC3	1	2	0	0	2	0	0.0464197	0.759904	1.74126
TMEM120B	1	2	0	0	2	1	0.0464197	0.759904	1.04811
TP53I13	1	2	0	1	1	0	0.0464197	0.759904	0.693147
TRIM32	1	2	0	0	2	0	0.0464197	0.759904	1.74126
TRIM68	1	2	0	0	2	0	0.0464197	0.759904	1.74126
UTP3	1	2	2	0	0	0	0.0464197	0.759904	0
XPNPEP1	1	2	0	0	2	0	0.0464197	0.759904	1.74126
ZFPL1	1	2	0	1	1	0	0.0464197	0.759904	0.693147
ZNF432	1	2	0	0	2	1	0.0464197	0.759904	1.04811
ZNF653	1	2	0	1	1	0	0.0464197	0.759904	0.693147
ATL3	15	6	2	0	4	1	0.0464961	0.759904	3.04385
CHRNB3	15	6	0	3	3	1	0.0464961	0.759904	2.07944
GPATCH8	15	6	0	0	6	4	0.0464961	0.759904	1.72586
LOC402377	15	6	3	2	1	1	0.0464961	0.759904	0
LRRC14	15	6	4	2	0	0	0.0464961	0.759904	0
PCNX	15	6	0	0	6	6	0.0464961	0.759904	0
RSU1	15	6	0	4	2	3	0.0464961	0.759904	-1.03133
SLC7A14	15	6	0	1	5	4	0.0464961	0.759904	0.894632
LRRC1	265	52	2	2	48	35	0.0471667	0.759904	3.32492
AES	11	5	2	1	2	3	0.0473292	0.759904	-1.03133
CTNNA2	11	5	0	0	5	3	0.0473292	0.759904	1.85904
FAM119A	11	5	0	2	3	3	0.0473292	0.759904	0
MYPOP	11	5	0	1	4	2	0.0473292	0.759904	1.99574
ODF3B	11	5	3	1	1	1	0.0473292	0.759904	0
PCDH18	11	5	2	2	1	1	0.0473292	0.759904	0
PLB1	11	5	0	1	4	3	0.0473292	0.759904	0.96441
PLP2	11	5	2	2	1	1	0.0473292	0.759904	0
SLC35C1	11	5	2	1	2	0	0.0473292	0.759904	1.74126
SLC5A8	11	5	2	0	3	2	0.0473292	0.759904	1.03133
SMARCE1	11	5	0	0	5	1	0.0473292	0.759904	3.93848
PTPLA	38	11	0	0	11	9	0.0474349	0.759904	1.25928
ZNF81	43	12	0	0	12	4	0.0480136	0.759904	5.75444
LRRC8B	106	24	7	8	9	3	0.048158	0.759904	4.87643
ABLIM1	24	8	0	0	8	1	0.0485589	0.759904	6.27189
FADS1	24	8	1	0	7	2	0.0485589	0.759904	4.49707
SORBS2	24	8	0	3	5	3	0.0485589	0.759904	1.85904
ANP32B	29	9	2	0	7	7	0.0514165	0.759904	0
CADPS	29	9	3	0	6	4	0.0514165	0.759904	1.72586
NUP93	29	9	1	2	6	7	0.0514165	0.759904	-0.775464
ACAT2	4	3	0	0	3	1	0.0514271	0.759904	2.07944
ACOT8	4	3	0	1	2	0	0.0514271	0.759904	1.74126
AFAP1L1	4	3	0	0	3	0	0.0514271	0.759904	2.77259
ATRIP	4	3	0	1	2	0	0.0514271	0.759904	1.74126
C4orf29	4	3	0	0	3	2	0.0514271	0.759904	1.03133
C9orf30	4	3	0	0	3	0	0.0514271	0.759904	2.77259
CHRNB1	4	3	1	1	1	0	0.0514271	0.759904	0.693147
CNBD1	4	3	0	0	3	2	0.0514271	0.759904	1.03133
DMXL2	4	3	0	0	3	0	0.0514271	0.759904	2.77259
DONSON	4	3	0	2	1	2	0.0514271	0.759904	-1.04811
EPN1	4	3	1	1	1	0	0.0514271	0.759904	0.693147
FAM19A2	4	3	0	0	3	2	0.0514271	0.759904	1.03133
FAM46B	4	3	0	0	3	1	0.0514271	0.759904	2.07944
FGFBP3	4	3	1	2	0	0	0.0514271	0.759904	0
GOLM1	4	3	0	0	3	2	0.0514271	0.759904	1.03133
GSDMD	4	3	2	1	0	0	0.0514271	0.759904	0
HIVEP2	4	3	0	0	3	1	0.0514271	0.759904	2.07944
HYAL3	4	3	1	2	0	0	0.0514271	0.759904	0
JMJD6	4	3	1	2	0	0	0.0514271	0.759904	0
KATNB1	4	3	0	0	3	3	0.0514271	0.759904	0
KIAA1279	4	3	1	1	1	0	0.0514271	0.759904	0.693147
LOC344595	4	3	0	0	3	0	0.0514271	0.759904	2.77259
MRFAP1L1	4	3	0	3	0	0	0.0514271	0.759904	0
NCRNA00235	4	3	3	0	0	0	0.0514271	0.759904	0
NFKBIA	4	3	1	0	2	0	0.0514271	0.759904	1.74126
NSUN5	4	3	1	0	2	0	0.0514271	0.759904	1.74126
NUDT8	4	3	1	0	2	2	0.0514271	0.759904	0
OAZ2	4	3	0	0	3	0	0.0514271	0.759904	2.77259
PABPC1	4	3	1	0	2	0	0.0514271	0.759904	1.74126
PAFAH1B2	4	3	0	0	3	1	0.0514271	0.759904	2.07944
PKP2	4	3	0	0	3	0	0.0514271	0.759904	2.77259
PRCP	4	3	0	0	3	0	0.0514271	0.759904	2.77259
PRDX4	4	3	1	0	2	1	0.0514271	0.759904	1.04811
RARRES3	4	3	1	0	2	0	0.0514271	0.759904	1.74126
RIOK3	4	3	0	2	1	0	0.0514271	0.759904	0.693147
SLC39A8	4	3	1	1	1	0	0.0514271	0.759904	0.693147
ST6GALNAC4	4	3	0	0	3	1	0.0514271	0.759904	2.07944
SURF4	4	3	0	0	3	1	0.0514271	0.759904	2.07944
THAP11	4	3	2	1	0	0	0.0514271	0.759904	0
TMEM8A	4	3	2	0	1	1	0.0514271	0.759904	0
UHMK1	4	3	1	0	2	4	0.0514271	0.759904	-1.99574
WDR27	4	3	0	0	3	2	0.0514271	0.759904	1.03133
ZNF655	4	3	1	0	2	1	0.0514271	0.759904	1.04811
ZNF775	4	3	0	0	3	0	0.0514271	0.759904	2.77259
OMG	107	24	7	16	1	4	0.051937	0.759904	-3.04385
LASS3	20	7	0	0	7	3	0.0530073	0.759904	3.46574
SNX17	20	7	0	1	6	4	0.0530073	0.759904	1.72586
SUN1	20	7	3	3	1	1	0.0530073	0.759904	0
TMUB1	20	7	4	2	1	1	0.0530073	0.759904	0
LOC100129387	54	14	9	5	0	0	0.05333	0.759904	0
PPM1H	49	13	0	0	13	5	0.0539013	0.759904	5.4162
ILF3	39	11	0	1	10	2	0.0539263	0.759904	6.5541
SLC35B4	39	11	0	1	10	1	0.0539263	0.759904	7.60221
WDR52	39	11	1	3	7	9	0.0539263	0.759904	-1.4107
FRMPD4	44	12	0	0	12	7	0.0541399	0.759904	3.25312
CDKN2A	25	8	0	0	8	5	0.0570515	0.759904	2.33341
CECR1	16	6	0	0	6	7	0.0571265	0.759904	-0.775464
DNAL1	16	6	0	0	6	2	0.0571265	0.759904	3.7216
EML3	16	6	1	4	1	1	0.0571265	0.759904	0
FAM65B	16	6	0	0	6	3	0.0571265	0.759904	2.69027
LRFN5	16	6	0	1	5	2	0.0571265	0.759904	2.89037
PIP5K1B	16	6	0	0	6	6	0.0571265	0.759904	0
BAZ1B	55	14	1	1	12	9	0.0591991	0.759904	1.84242
CRTAP	30	9	0	0	9	3	0.0594143	0.759904	4.87643
LOC147727	30	9	5	4	0	0	0.0594143	0.759904	0
TTC35	30	9	0	0	9	6	0.0594143	0.759904	2.18616
AGXT2L2	8	4	0	0	4	2	0.0599434	0.759904	1.99574
AKAP9	8	4	1	2	1	0	0.0599434	0.759904	0.693147
ALDH16A1	8	4	0	0	4	0	0.0599434	0.759904	3.737
ATP8B2	8	4	0	0	4	1	0.0599434	0.759904	3.04385
CHAC2	8	4	2	0	2	1	0.0599434	0.759904	1.04811
DYX1C1	8	4	3	1	0	1	0.0599434	0.759904	-0.693147
FUT11	8	4	1	3	0	0	0.0599434	0.759904	0
HOXA11	8	4	2	1	1	0	0.0599434	0.759904	0.693147
PTPRR	8	4	0	0	4	1	0.0599434	0.759904	3.04385
RPH3AL	8	4	1	0	3	4	0.0599434	0.759904	-0.96441
SFRS2B	8	4	0	4	0	0	0.0599434	0.759904	0
TRA2A	8	4	2	1	1	0	0.0599434	0.759904	0.693147
UBE2W	8	4	0	0	4	2	0.0599434	0.759904	1.99574
YARS2	8	4	1	2	1	1	0.0599434	0.759904	0
ZADH2	8	4	0	0	4	1	0.0599434	0.759904	3.04385
ZDHHC2	8	4	0	0	4	5	0.0599434	0.759904	-0.894632
ZNF529	8	4	0	0	4	0	0.0599434	0.759904	3.737
ATF1	12	5	0	1	4	0	0.0600885	0.759904	3.737
CSDE1	12	5	1	0	4	6	0.0600885	0.759904	-1.72586
GAA	12	5	1	2	2	2	0.0600885	0.759904	0
ID3	12	5	2	3	0	2	0.0600885	0.759904	-1.74126
KIF20B	12	5	0	0	5	2	0.0600885	0.759904	2.89037
KILLIN	12	5	2	3	0	0	0.0600885	0.759904	0
NIPAL2	12	5	0	0	5	1	0.0600885	0.759904	3.93848
SEP15	12	5	1	0	4	3	0.0600885	0.759904	0.96441
TARS2	12	5	1	3	1	2	0.0600885	0.759904	-1.04811
ZBED5	12	5	0	0	5	1	0.0600885	0.759904	3.93848
VGLL4	50	13	2	5	6	6	0.0601367	0.759904	0
NRN1	21	7	3	0	4	0	0.0630303	0.759904	3.737
SMAD3	56	14	3	0	11	15	0.0654892	0.759904	-2.18206
ATP5A1	72	17	0	0	17	17	0.0661504	0.759904	0
PHF8	26	8	3	3	2	3	0.0664274	0.759904	-1.03133
SNX25	26	8	0	0	8	5	0.0664274	0.759904	2.33341
PPP3CC	94	21	4	6	11	11	0.0674672	0.759904	0
NBR1	31	9	1	6	2	0	0.0681662	0.759904	1.74126
SLC29A2	31	9	1	0	8	4	0.0681662	0.759904	3.22804
TMCC1	41	11	2	1	8	6	0.0686205	0.759904	1.50218
C4orf37	36	10	0	0	10	1	0.0687812	0.759904	7.60221
C20orf132	17	6	0	0	6	2	0.0690926	0.759904	3.7216
DCUN1D2	17	6	0	0	6	5	0.0690926	0.759904	0.831229
GALNTL4	17	6	0	4	2	1	0.0690926	0.759904	1.04811
KIAA0226	17	6	2	0	4	5	0.0690926	0.759904	-0.894632
PPP3CB	17	6	0	0	6	3	0.0690926	0.759904	2.69027
RLIM	17	6	0	0	6	2	0.0690926	0.759904	3.7216
TADA2A	17	6	2	2	2	1	0.0690926	0.759904	1.04811
TNPO1	17	6	0	0	6	3	0.0690926	0.759904	2.69027
CNTNAP2	89	20	1	0	19	8	0.0700764	0.759904	5.9823
TSR1	52	13	6	5	2	4	0.074009	0.759904	-1.99574
C11orf73	22	7	0	0	7	4	0.0741262	0.759904	2.50133
IQGAP2	22	7	0	1	6	3	0.0741262	0.759904	2.69027
SPATS2L	22	7	0	1	6	5	0.0741262	0.759904	0.831229
GPC6	129	27	2	3	22	16	0.0742764	0.759904	2.60295
AHDC1	5	3	0	1	2	1	0.0744895	0.759904	1.04811
BIVM	5	3	0	0	3	3	0.0744895	0.759904	0
C11orf57	5	3	1	1	1	2	0.0744895	0.759904	-1.04811
C1GALT1C1	5	3	0	0	3	2	0.0744895	0.759904	1.03133
C9orf37	5	3	0	2	1	0	0.0744895	0.759904	0.693147
CBX4	5	3	0	1	2	0	0.0744895	0.759904	1.74126
GGT1	5	3	0	0	3	0	0.0744895	0.759904	2.77259
GIT2	5	3	0	0	3	1	0.0744895	0.759904	2.07944
GPR176	5	3	0	0	3	0	0.0744895	0.759904	2.77259
IFIT5	5	3	0	1	2	1	0.0744895	0.759904	1.04811
KIAA0802	5	3	0	0	3	2	0.0744895	0.759904	1.03133
KIAA1529	5	3	0	0	3	1	0.0744895	0.759904	2.07944
LMF1	5	3	0	0	3	2	0.0744895	0.759904	1.03133
MBP	5	3	0	0	3	1	0.0744895	0.759904	2.07944
MESP1	5	3	2	1	0	0	0.0744895	0.759904	0
MRI1	5	3	1	2	0	0	0.0744895	0.759904	0
MSL2	5	3	1	2	0	0	0.0744895	0.759904	0
MTMR9L	5	3	1	0	2	0	0.0744895	0.759904	1.74126
NDUFAB1	5	3	0	0	3	0	0.0744895	0.759904	2.77259
NFATC2	5	3	0	0	3	2	0.0744895	0.759904	1.03133
NPM3	5	3	1	1	1	2	0.0744895	0.759904	-1.04811
PARP4	5	3	0	0	3	2	0.0744895	0.759904	1.03133
PCOLCE	5	3	0	1	2	0	0.0744895	0.759904	1.74126
PEX5	5	3	0	3	0	0	0.0744895	0.759904	0
PLEKHH3	5	3	0	1	2	0	0.0744895	0.759904	1.74126
POLG	5	3	2	1	0	0	0.0744895	0.759904	0
PRNP	5	3	0	1	2	0	0.0744895	0.759904	1.74126
PSENEN	5	3	0	1	2	0	0.0744895	0.759904	1.74126
RALGAPB	5	3	0	0	3	1	0.0744895	0.759904	2.07944
SDHD	5	3	0	0	3	2	0.0744895	0.759904	1.03133
SEC23IP	5	3	0	0	3	2	0.0744895	0.759904	1.03133
SLC26A1	5	3	0	0	3	1	0.0744895	0.759904	2.07944
TMUB2	5	3	2	1	0	0	0.0744895	0.759904	0
TRAF7	5	3	0	0	3	1	0.0744895	0.759904	2.07944
TXNDC11	5	3	0	0	3	1	0.0744895	0.759904	2.07944
UBQLN2	5	3	2	1	0	0	0.0744895	0.759904	0
UGGT1	5	3	0	1	2	2	0.0744895	0.759904	0
VPRBP	5	3	1	0	2	0	0.0744895	0.759904	1.74126
ZIC2	5	3	0	1	2	1	0.0744895	0.759904	1.04811
ZNF358	5	3	0	0	3	1	0.0744895	0.759904	2.07944
ZNF764	5	3	1	0	2	1	0.0744895	0.759904	1.04811
ANKRD34A	13	5	1	4	0	2	0.0746016	0.759904	-1.74126
C10orf46	13	5	0	0	5	1	0.0746016	0.759904	3.93848
HTR7	13	5	0	0	5	2	0.0746016	0.759904	2.89037
INCA1	13	5	4	1	0	0	0.0746016	0.759904	0
LOC219347	13	5	0	1	4	0	0.0746016	0.759904	3.737
MTIF2	13	5	2	0	3	0	0.0746016	0.759904	2.77259
RUVBL1	13	5	0	0	5	3	0.0746016	0.759904	1.85904
SEMA4A	13	5	0	1	4	2	0.0746016	0.759904	1.99574
THAP7	13	5	0	1	4	2	0.0746016	0.759904	1.99574
TLX1	13	5	1	0	4	1	0.0746016	0.759904	3.04385
TOX2	13	5	0	1	4	0	0.0746016	0.759904	3.737
TRMT2A	13	5	1	2	2	1	0.0746016	0.759904	1.04811
TMEM143	27	8	1	2	5	2	0.076697	0.759904	2.89037
INTU	32	9	0	1	8	7	0.0776819	0.759904	0.726712
APITD1	9	4	1	3	0	0	0.0779469	0.759904	0
BAP1	9	4	1	1	2	4	0.0779469	0.759904	-1.99574
CCDC138	9	4	0	0	4	2	0.0779469	0.759904	1.99574
CLK1	9	4	2	0	2	0	0.0779469	0.759904	1.74126
DDX56	9	4	1	0	3	0	0.0779469	0.759904	2.77259
DENND1B	9	4	0	0	4	4	0.0779469	0.759904	0
HCG18	9	4	1	0	3	2	0.0779469	0.759904	1.03133
LIFR	9	4	0	0	4	1	0.0779469	0.759904	3.04385
LPP	9	4	1	0	3	4	0.0779469	0.759904	-0.96441
LRP8	9	4	0	1	3	3	0.0779469	0.759904	0
LRRC8A	9	4	1	2	1	0	0.0779469	0.759904	0.693147
NFKBIZ	9	4	0	0	4	3	0.0779469	0.759904	0.96441
NOTCH4	9	4	2	1	1	1	0.0779469	0.759904	0
QKI	9	4	1	0	3	1	0.0779469	0.759904	2.07944
SLC35F2	9	4	0	0	4	1	0.0779469	0.759904	3.04385
STT3B	9	4	0	2	2	1	0.0779469	0.759904	1.04811
TACO1	9	4	1	2	1	0	0.0779469	0.759904	0.693147
THUMPD2	9	4	0	0	4	2	0.0779469	0.759904	1.99574
TMED4	9	4	1	1	2	2	0.0779469	0.759904	0
TXLNA	9	4	1	2	1	2	0.0779469	0.759904	-1.04811
TXNIP	9	4	4	0	0	0	0.0779469	0.759904	0
APBB2	96	21	0	0	21	21	0.0781559	0.759904	0
C15orf17	53	13	1	3	9	2	0.0816603	0.759904	5.90776
FHOD3	53	13	0	0	13	12	0.0816603	0.759904	0.556387
NELL2	53	13	0	0	13	9	0.0816603	0.759904	2.39881
CBS	18	6	0	1	5	3	0.0823921	0.759904	1.85904
COPS7A	18	6	2	4	0	1	0.0823921	0.759904	-0.693147
CS	18	6	0	0	6	1	0.0823921	0.759904	4.76971
KIAA0182	18	6	0	0	6	3	0.0823921	0.759904	2.69027
MC1R	18	6	2	4	0	0	0.0823921	0.759904	0
POMGNT1	18	6	1	0	5	5	0.0823921	0.759904	0
SLC9A7	18	6	0	0	6	2	0.0823921	0.759904	3.7216
TIAL1	18	6	0	0	6	0	0.0823921	0.759904	5.46286
ADRBK1	2	2	0	0	2	3	0.0848783	0.759904	-1.03133
AMDHD2	2	2	0	1	1	0	0.0848783	0.759904	0.693147
AMZ2P1	2	2	1	1	0	0	0.0848783	0.759904	0
APC2	2	2	0	2	0	0	0.0848783	0.759904	0
ATG4D	2	2	1	1	0	0	0.0848783	0.759904	0
ATG9B	2	2	2	0	0	0	0.0848783	0.759904	0
B3GAT2	2	2	0	0	2	0	0.0848783	0.759904	1.74126
BAT3	2	2	2	0	0	0	0.0848783	0.759904	0
BCAM	2	2	0	0	2	0	0.0848783	0.759904	1.74126
C14orf119	2	2	0	1	1	0	0.0848783	0.759904	0.693147
C1orf123	2	2	0	0	2	1	0.0848783	0.759904	1.04811
C7orf30	2	2	0	0	2	0	0.0848783	0.759904	1.74126
CCBE1	2	2	0	0	2	0	0.0848783	0.759904	1.74126
CCDC90B	2	2	0	0	2	0	0.0848783	0.759904	1.74126
CD47	2	2	0	0	2	2	0.0848783	0.759904	0
CD99L2	2	2	1	0	1	0	0.0848783	0.759904	0.693147
CENPB	2	2	2	0	0	0	0.0848783	0.759904	0
CEP97	2	2	0	0	2	2	0.0848783	0.759904	0
CIAO1	2	2	0	1	1	0	0.0848783	0.759904	0.693147
COL9A2	2	2	0	0	2	0	0.0848783	0.759904	1.74126
DCAF13	2	2	1	0	1	0	0.0848783	0.759904	0.693147
DIP2A	2	2	0	0	2	1	0.0848783	0.759904	1.04811
DPM1	2	2	0	0	2	1	0.0848783	0.759904	1.04811
DPM3	2	2	2	0	0	0	0.0848783	0.759904	0
DRAM1	2	2	0	1	1	1	0.0848783	0.759904	0
EAF2	2	2	0	0	2	3	0.0848783	0.759904	-1.03133
FAM193B	2	2	0	2	0	0	0.0848783	0.759904	0
FAM3A	2	2	2	0	0	0	0.0848783	0.759904	0
FASTKD5	2	2	0	0	2	0	0.0848783	0.759904	1.74126
FGF7	2	2	0	1	1	0	0.0848783	0.759904	0.693147
FLJ35220	2	2	2	0	0	0	0.0848783	0.759904	0
FOXD3	2	2	0	2	0	0	0.0848783	0.759904	0
FRS2	2	2	0	0	2	0	0.0848783	0.759904	1.74126
GABRA5	2	2	1	0	1	0	0.0848783	0.759904	0.693147
GLB1	2	2	0	1	1	2	0.0848783	0.759904	-1.04811
GPR137C	2	2	0	0	2	1	0.0848783	0.759904	1.04811
HIST1H1D	2	2	0	2	0	0	0.0848783	0.759904	0
IFT80	2	2	0	0	2	0	0.0848783	0.759904	1.74126
KBTBD8	2	2	0	0	2	0	0.0848783	0.759904	1.74126
KCNC2	2	2	0	0	2	0	0.0848783	0.759904	1.74126
KIF2A	2	2	0	0	2	0	0.0848783	0.759904	1.74126
LHFPL3	2	2	0	0	2	1	0.0848783	0.759904	1.04811
LIMS1	2	2	0	0	2	1	0.0848783	0.759904	1.04811
LOC100128292	2	2	2	0	0	0	0.0848783	0.759904	0
LOC100134713	2	2	1	1	0	0	0.0848783	0.759904	0
LOC100303728	2	2	1	1	0	0	0.0848783	0.759904	0
LOC728276	2	2	0	0	2	1	0.0848783	0.759904	1.04811
LOC84989	2	2	0	2	0	0	0.0848783	0.759904	0
MAP3K11	2	2	2	0	0	0	0.0848783	0.759904	0
MEAF6	2	2	0	0	2	0	0.0848783	0.759904	1.74126
MTCH1	2	2	0	0	2	1	0.0848783	0.759904	1.04811
NPW	2	2	1	1	0	0	0.0848783	0.759904	0
NRBP2	2	2	0	1	1	0	0.0848783	0.759904	0.693147
OCIAD2	2	2	0	2	0	0	0.0848783	0.759904	0
ORAI3	2	2	0	0	2	0	0.0848783	0.759904	1.74126
PAPOLG	2	2	1	0	1	0	0.0848783	0.759904	0.693147
PAPPA2	2	2	0	0	2	0	0.0848783	0.759904	1.74126
PCDHGA11	2	2	0	0	2	1	0.0848783	0.759904	1.04811
PCDHGA12	2	2	0	0	2	1	0.0848783	0.759904	1.04811
PCDHGB7	2	2	0	0	2	1	0.0848783	0.759904	1.04811
PGD	2	2	0	0	2	2	0.0848783	0.759904	0
PIGX	2	2	0	0	2	1	0.0848783	0.759904	1.04811
PKN1	2	2	0	0	2	2	0.0848783	0.759904	0
PTTG1	2	2	0	0	2	0	0.0848783	0.759904	1.74126
RAB27B	2	2	0	0	2	1	0.0848783	0.759904	1.04811
RFTN1	2	2	0	0	2	0	0.0848783	0.759904	1.74126
RG9MTD3	2	2	0	0	2	0	0.0848783	0.759904	1.74126
RGAG4	2	2	2	0	0	1	0.0848783	0.759904	-0.693147
RNF115	2	2	1	0	1	0	0.0848783	0.759904	0.693147
RNF187	2	2	0	0	2	1	0.0848783	0.759904	1.04811
RNF6	2	2	0	0	2	0	0.0848783	0.759904	1.74126
SCARF2	2	2	0	1	1	1	0.0848783	0.759904	0
SEMA4F	2	2	1	0	1	1	0.0848783	0.759904	0
SLC25A1	2	2	0	1	1	0	0.0848783	0.759904	0.693147
SLC31A1	2	2	0	0	2	1	0.0848783	0.759904	1.04811
SLC38A7	2	2	1	0	1	0	0.0848783	0.759904	0.693147
SP110	2	2	0	0	2	0	0.0848783	0.759904	1.74126
SRGAP3	2	2	0	0	2	1	0.0848783	0.759904	1.04811
STAG3L4	2	2	0	0	2	1	0.0848783	0.759904	1.04811
STOM	2	2	0	0	2	1	0.0848783	0.759904	1.04811
STX6	2	2	1	0	1	1	0.0848783	0.759904	0
TBX6	2	2	0	0	2	2	0.0848783	0.759904	0
TIGD5	2	2	1	1	0	0	0.0848783	0.759904	0
TRIM5	2	2	0	0	2	0	0.0848783	0.759904	1.74126
TROAP	2	2	1	0	1	1	0.0848783	0.759904	0
TTC39B	2	2	0	0	2	0	0.0848783	0.759904	1.74126
TUSC2	2	2	2	0	0	0	0.0848783	0.759904	0
UBOX5	2	2	0	0	2	1	0.0848783	0.759904	1.04811
USP21	2	2	2	0	0	1	0.0848783	0.759904	-0.693147
USP51	2	2	1	1	0	1	0.0848783	0.759904	-0.693147
UTP23	2	2	0	0	2	0	0.0848783	0.759904	1.74126
VWF	2	2	0	0	2	2	0.0848783	0.759904	0
WDR41	2	2	1	0	1	0	0.0848783	0.759904	0.693147
ZCCHC17	2	2	0	0	2	0	0.0848783	0.759904	1.74126
ZDHHC15	2	2	0	1	1	0	0.0848783	0.759904	0.693147
ZNF552	2	2	0	0	2	0	0.0848783	0.759904	1.74126
ZNF643	2	2	1	1	0	0	0.0848783	0.759904	0
ZNF853	2	2	1	0	1	0	0.0848783	0.759904	0.693147
F11R	23	7	0	0	7	3	0.0862953	0.759904	3.46574
MGC3771	23	7	1	0	6	4	0.0862953	0.759904	1.72586
SNTB2	23	7	1	0	6	5	0.0862953	0.759904	0.831229
ATRX	28	8	1	2	5	4	0.0878629	0.759904	0.894632
EFCAB2	28	8	2	0	6	1	0.0878629	0.759904	4.76971
FSIP1	28	8	0	0	8	8	0.0878629	0.759904	0
LOC100302652	28	8	0	0	8	6	0.0878629	0.759904	1.50218
FBXL22	33	9	2	3	4	5	0.0879654	0.759904	-0.894632
ACTR1B	14	5	1	0	4	0	0.0908322	0.759904	3.737
C7orf68	14	5	0	0	5	2	0.0908322	0.759904	2.89037
CHST12	14	5	0	0	5	3	0.0908322	0.759904	1.85904
DYSFIP1	14	5	0	1	4	2	0.0908322	0.759904	1.99574
MDH2	14	5	0	0	5	3	0.0908322	0.759904	1.85904
PEMT	14	5	0	0	5	2	0.0908322	0.759904	2.89037
MPPED2	215	41	0	0	41	37	0.0938891	0.759904	1.06491
LDB2	257	48	0	0	48	33	0.0946754	0.759904	3.91121
PICALM	44	11	0	0	11	10	0.0950727	0.759904	0.612942
CCND3	71	16	0	0	16	9	0.0956428	0.759904	3.93163
ERBB4	71	16	0	0	16	16	0.0956428	0.759904	0
C18orf56	19	6	0	0	6	3	0.0970047	0.759904	2.69027
FAM109B	19	6	4	2	0	0	0.0970047	0.759904	0
HOXA11AS	19	6	0	2	4	0	0.0970047	0.759904	3.737
NRM	19	6	0	3	3	1	0.0970047	0.759904	2.07944
PARP11	19	6	1	4	1	0	0.0970047	0.759904	0.693147
USP18	19	6	0	1	5	4	0.0970047	0.759904	0.894632
USP22	19	6	2	0	4	5	0.0970047	0.759904	-0.894632
ZMYM3	19	6	4	0	2	0	0.0970047	0.759904	1.74126
AXIN1	39	10	0	0	10	11	0.0972991	0.759904	-0.612942
LETMD1	39	10	1	2	7	2	0.0972991	0.759904	4.49707
LOC100128675	151	30	1	0	29	22	0.0976123	0.759904	2.5057
ADARB2	10	4	0	0	4	4	0.0983047	0.759904	0
ARFGEF2	10	4	0	0	4	3	0.0983047	0.759904	0.96441
ARMC6	10	4	0	0	4	4	0.0983047	0.759904	0
C5orf39	10	4	0	4	0	0	0.0983047	0.759904	0
CEBPB	10	4	3	1	0	0	0.0983047	0.759904	0
CPNE7	10	4	0	2	2	2	0.0983047	0.759904	0
EDC3	10	4	0	1	3	2	0.0983047	0.759904	1.03133
HOXA7	10	4	2	1	1	1	0.0983047	0.759904	0
LGTN	10	4	0	1	3	2	0.0983047	0.759904	1.03133
LIF	10	4	2	0	2	0	0.0983047	0.759904	1.74126
LYSMD1	10	4	2	1	1	1	0.0983047	0.759904	0
MEX3A	10	4	0	2	2	2	0.0983047	0.759904	0
MKRN1	10	4	1	0	3	2	0.0983047	0.759904	1.03133
MRPL4	10	4	0	0	4	1	0.0983047	0.759904	3.04385
PRKAA1	10	4	1	0	3	4	0.0983047	0.759904	-0.96441
RBCK1	10	4	0	0	4	0	0.0983047	0.759904	3.737
TNFSF12-TNFSF13	10	4	1	2	1	1	0.0983047	0.759904	0
USP7	10	4	0	0	4	1	0.0983047	0.759904	3.04385
CTTNBP2	55	13	1	0	12	6	0.0984133	0.759904	4.02858
PION	55	13	0	0	13	8	0.0984133	0.759904	3.08279
TP53	34	9	0	0	9	9	0.0990148	0.759904	0
FANCI	24	7	0	0	7	4	0.0995266	0.759904	2.50133
KCNMB2	24	7	0	1	6	1	0.0995266	0.759904	4.76971
KIAA1671	24	7	0	0	7	6	0.0995266	0.759904	0.775464
MAPK6	24	7	0	0	7	6	0.0995266	0.759904	0.775464
PROM1	24	7	0	0	7	9	0.0995266	0.759904	-1.4107
SHOX2	24	7	1	0	6	2	0.0995266	0.759904	3.7216
SLC38A1	24	7	0	1	6	8	0.0995266	0.759904	-1.50218
C12orf61	29	8	4	4	0	0	0.0999196	0.759904	0
EML2	29	8	1	2	5	4	0.0999196	0.759904	0.894632
MAZ	29	8	3	5	0	2	0.0999196	0.759904	-1.74126
SLC22A23	29	8	0	0	8	3	0.0999196	0.759904	4.19245
DNAI1	94	20	0	0	20	18	0.100536	0.759904	0.864746
ACACB	6	3	0	0	3	1	0.101237	0.759904	2.07944
ARHGAP39	6	3	1	1	1	0	0.101237	0.759904	0.693147
AUH	6	3	0	0	3	0	0.101237	0.759904	2.77259
BACH1	6	3	0	0	3	2	0.101237	0.759904	1.03133
BCAP29	6	3	1	0	2	0	0.101237	0.759904	1.74126
C3orf38	6	3	0	1	2	0	0.101237	0.759904	1.74126
C4orf38	6	3	0	3	0	0	0.101237	0.759904	0
C6orf141	6	3	2	1	0	0	0.101237	0.759904	0
C9orf66	6	3	1	2	0	0	0.101237	0.759904	0
CASP8	6	3	2	0	1	1	0.101237	0.759904	0
CEBPG	6	3	0	2	1	0	0.101237	0.759904	0.693147
CNNM1	6	3	1	1	1	0	0.101237	0.759904	0.693147
DHRS11	6	3	2	0	1	0	0.101237	0.759904	0.693147
DNM1P35	6	3	1	2	0	0	0.101237	0.759904	0
FLOT2	6	3	0	0	3	0	0.101237	0.759904	2.77259
HDAC11	6	3	0	0	3	1	0.101237	0.759904	2.07944
IL28RA	6	3	1	1	1	0	0.101237	0.759904	0.693147
KPNA1	6	3	0	1	2	1	0.101237	0.759904	1.04811
LOC100133669	6	3	0	0	3	0	0.101237	0.759904	2.77259
LOC256880	6	3	0	3	0	0	0.101237	0.759904	0
LONRF3	6	3	0	1	2	0	0.101237	0.759904	1.74126
LZIC	6	3	2	1	0	1	0.101237	0.759904	-0.693147
MYST3	6	3	0	0	3	0	0.101237	0.759904	2.77259
NCRNA00183	6	3	0	0	3	1	0.101237	0.759904	2.07944
NOL6	6	3	0	0	3	1	0.101237	0.759904	2.07944
NTNG2	6	3	1	1	1	0	0.101237	0.759904	0.693147
OAZ1	6	3	0	1	2	2	0.101237	0.759904	0
PCK2	6	3	0	0	3	2	0.101237	0.759904	1.03133
PITPNM3	6	3	2	1	0	1	0.101237	0.759904	-0.693147
PRODH	6	3	0	0	3	0	0.101237	0.759904	2.77259
RNF126	6	3	0	0	3	1	0.101237	0.759904	2.07944
ROBLD3	6	3	2	0	1	0	0.101237	0.759904	0.693147
SEC24B	6	3	1	0	2	2	0.101237	0.759904	0
SLC10A3	6	3	1	1	1	0	0.101237	0.759904	0.693147
SLC25A32	6	3	0	1	2	1	0.101237	0.759904	1.04811
SPHK1	6	3	1	2	0	0	0.101237	0.759904	0
SRF	6	3	1	1	1	0	0.101237	0.759904	0.693147
TMEM5	6	3	0	0	3	1	0.101237	0.759904	2.07944
TNFSF13	6	3	1	2	0	1	0.101237	0.759904	-0.693147
TRNAU1AP	6	3	1	0	2	0	0.101237	0.759904	1.74126
WNT7A	6	3	0	0	3	1	0.101237	0.759904	2.07944
ZCCHC14	6	3	0	1	2	2	0.101237	0.759904	0
ZCCHC4	6	3	1	0	2	3	0.101237	0.759904	-1.03133
ZNF205	6	3	0	0	3	3	0.101237	0.759904	0
ZNF276	6	3	0	1	2	1	0.101237	0.759904	1.04811
EXOC6	50	12	0	0	12	13	0.101799	0.759904	-0.556387
ATF7IP	45	11	0	0	11	5	0.105078	0.759904	4.27667
RAI1	45	11	0	0	11	8	0.105078	0.759904	1.94326
ASH2L	40	10	3	2	5	5	0.108142	0.759904	0
WWC2	40	10	0	2	8	9	0.108142	0.759904	-0.683985
ARHGAP17	15	5	0	0	5	0	0.108715	0.759904	4.63163
BCL6	15	5	0	1	4	4	0.108715	0.759904	0
CAPN2	15	5	0	0	5	1	0.108715	0.759904	3.93848
CMTM7	15	5	0	0	5	3	0.108715	0.759904	1.85904
COX5A	15	5	0	0	5	2	0.108715	0.759904	2.89037
CYFIP1	15	5	0	0	5	1	0.108715	0.759904	3.93848
DUSP28	15	5	1	4	0	0	0.108715	0.759904	0
GLCCI1	15	5	0	0	5	0	0.108715	0.759904	4.63163
GPRIN3	15	5	1	0	4	2	0.108715	0.759904	1.99574
KISS1R	15	5	0	2	3	6	0.108715	0.759904	-2.69027
LAPTM4B	15	5	0	0	5	0	0.108715	0.759904	4.63163
LHX1	15	5	3	2	0	1	0.108715	0.759904	-0.693147
LMNA	15	5	0	0	5	4	0.108715	0.759904	0.894632
MRPS34	15	5	2	1	2	0	0.108715	0.759904	1.74126
NAPEPLD	15	5	2	0	3	0	0.108715	0.759904	2.77259
TIAM2	15	5	0	0	5	4	0.108715	0.759904	0.894632
SHROOM3	165	32	2	2	28	18	0.109698	0.759904	3.8505
GABRB3	35	9	0	0	9	3	0.110823	0.759904	4.87643
LZTS2	35	9	0	0	9	3	0.110823	0.759904	4.87643
PLD6	35	9	1	1	7	3	0.110823	0.759904	3.46574
RSBN1L	35	9	2	1	6	1	0.110823	0.759904	4.76971
AS3MT	30	8	2	0	6	1	0.112854	0.759904	4.76971
IFT172	30	8	1	2	5	7	0.112854	0.759904	-1.60669
COL4A5	20	6	0	0	6	2	0.112893	0.759904	3.7216
MAPK1IP1L	20	6	0	0	6	3	0.112893	0.759904	2.69027
MRPL34	20	6	4	2	0	0	0.112893	0.759904	0
NT5C3	20	6	0	1	5	2	0.112893	0.759904	2.89037
SEH1L	20	6	1	0	5	5	0.112893	0.759904	0
AKAP8	25	7	0	0	7	4	0.113798	0.759904	2.50133
ASB3	25	7	0	0	7	5	0.113798	0.759904	1.60669
CDKN2BAS	25	7	0	0	7	3	0.113798	0.759904	3.46574
MIP	25	7	6	1	0	0	0.113798	0.759904	0
UTP14A	25	7	0	1	6	4	0.113798	0.759904	1.72586
ZNF497	25	7	0	0	7	2	0.113798	0.759904	4.49707
DNAJC27	46	11	7	4	0	3	0.115674	0.759904	-2.77259
NKIRAS2	46	11	0	0	11	4	0.115674	0.759904	5.1713
FGFR2	85	18	1	1	16	9	0.117709	0.759904	3.93163
LOC150381	137	27	7	4	16	12	0.117882	0.759904	2.08921
NYX	41	10	5	4	1	1	0.119644	0.759904	0
TBC1D14	41	10	0	0	10	11	0.119644	0.759904	-0.612942
MICALCL	74	16	1	1	14	11	0.120159	0.759904	1.67176
ALK	11	4	0	0	4	2	0.120842	0.759904	1.99574
BPHL	11	4	0	0	4	1	0.120842	0.759904	3.04385
EIF2C3	11	4	0	1	3	0	0.120842	0.759904	2.77259
FAM59B	11	4	0	0	4	1	0.120842	0.759904	3.04385
FARS2	11	4	0	0	4	6	0.120842	0.759904	-1.72586
FSCN1	11	4	0	0	4	1	0.120842	0.759904	3.04385
GDF3	11	4	1	0	3	0	0.120842	0.759904	2.77259
GPNMB	11	4	0	1	3	2	0.120842	0.759904	1.03133
IL1RAPL2	11	4	0	0	4	2	0.120842	0.759904	1.99574
NRD1	11	4	0	1	3	1	0.120842	0.759904	2.07944
ORAI1	11	4	0	0	4	1	0.120842	0.759904	3.04385
RBM16	11	4	0	2	2	3	0.120842	0.759904	-1.03133
SDCCAG3	11	4	1	1	2	2	0.120842	0.759904	0
SENP8	11	4	0	1	3	1	0.120842	0.759904	2.07944
SNHG10	11	4	2	2	0	0	0.120842	0.759904	0
TAPT1	11	4	0	0	4	2	0.120842	0.759904	1.99574
TMEM164	11	4	1	0	3	4	0.120842	0.759904	-0.96441
TTBK2	11	4	0	0	4	0	0.120842	0.759904	3.737
TTLL11	11	4	0	0	4	1	0.120842	0.759904	3.04385
EPB41L4B	63	14	0	0	14	11	0.121758	0.759904	1.67176
SLC7A11	63	14	0	1	13	4	0.121758	0.759904	6.31083
CENPV	36	9	2	0	7	7	0.123376	0.759904	0
OSBPL6	36	9	1	0	8	4	0.123376	0.759904	3.22804
SPHK2	36	9	0	2	7	5	0.123376	0.759904	1.60669
ZSWIM6	69	15	0	0	15	10	0.125714	0.759904	2.795
HHAT	31	8	1	1	6	3	0.126645	0.759904	2.69027
LARP1	31	8	0	0	8	2	0.126645	0.759904	5.22378
SEMA3D	47	11	7	3	1	4	0.12685	0.759904	-3.04385
FAM184B	58	13	0	0	13	5	0.127164	0.759904	5.4162
ACCN1	16	5	0	0	5	5	0.128158	0.759904	0
ASXL3	16	5	0	0	5	6	0.128158	0.759904	-0.831229
BTG2	16	5	2	1	2	2	0.128158	0.759904	0
C11orf20	16	5	3	1	1	2	0.128158	0.759904	-1.04811
CDC42EP3	16	5	0	0	5	0	0.128158	0.759904	4.63163
E2F8	16	5	0	1	4	2	0.128158	0.759904	1.99574
LOC646851	16	5	0	0	5	0	0.128158	0.759904	4.63163
MAGEC3	16	5	0	0	5	4	0.128158	0.759904	0.894632
PREP	16	5	0	0	5	3	0.128158	0.759904	1.85904
PRKCE	16	5	1	0	4	5	0.128158	0.759904	-0.894632
CDC123	26	7	0	2	5	2	0.129075	0.759904	2.89037
CTTNBP2NL	26	7	1	0	6	4	0.129075	0.759904	1.72586
FSTL3	26	7	2	3	2	0	0.129075	0.759904	1.74126
LOC100289341	26	7	6	1	0	0	0.129075	0.759904	0
PRTFDC1	26	7	0	1	6	8	0.129075	0.759904	-1.50218
VARS	26	7	0	3	4	2	0.129075	0.759904	1.99574
FLJ37453	75	16	9	5	2	3	0.129082	0.759904	-1.03133
ACTN2	3	2	0	1	1	0	0.129481	0.759904	0.693147
ADAMTS10	3	2	0	0	2	0	0.129481	0.759904	1.74126
AOAH	3	2	0	0	2	1	0.129481	0.759904	1.04811
ARAF	3	2	0	0	2	1	0.129481	0.759904	1.04811
ARAP3	3	2	0	0	2	0	0.129481	0.759904	1.74126
ARL6IP6	3	2	1	1	0	1	0.129481	0.759904	-0.693147
ATHL1	3	2	0	1	1	0	0.129481	0.759904	0.693147
B4GALNT3	3	2	0	0	2	0	0.129481	0.759904	1.74126
B4GALT4	3	2	0	0	2	0	0.129481	0.759904	1.74126
BLOC1S3	3	2	2	0	0	0	0.129481	0.759904	0
C15orf29	3	2	0	0	2	0	0.129481	0.759904	1.74126
C16orf75	3	2	0	0	2	0	0.129481	0.759904	1.74126
CACNG8	3	2	0	0	2	0	0.129481	0.759904	1.74126
CASP3	3	2	1	0	1	0	0.129481	0.759904	0.693147
CIDEA	3	2	0	0	2	0	0.129481	0.759904	1.74126
CNP	3	2	0	0	2	1	0.129481	0.759904	1.04811
COG6	3	2	0	0	2	0	0.129481	0.759904	1.74126
CSGALNACT2	3	2	0	0	2	1	0.129481	0.759904	1.04811
CYP26B1	3	2	0	0	2	3	0.129481	0.759904	-1.03133
DCAF4	3	2	0	0	2	1	0.129481	0.759904	1.04811
DCLRE1C	3	2	0	0	2	0	0.129481	0.759904	1.74126
DGCR6L	3	2	1	0	1	1	0.129481	0.759904	0
DOC2A	3	2	0	0	2	0	0.129481	0.759904	1.74126
DOLK	3	2	2	0	0	0	0.129481	0.759904	0
DOM3Z	3	2	1	1	0	0	0.129481	0.759904	0
DVL3	3	2	0	1	1	0	0.129481	0.759904	0.693147
DYNC1LI2	3	2	1	1	0	0	0.129481	0.759904	0
EIF5	3	2	1	0	1	1	0.129481	0.759904	0
EMB	3	2	0	0	2	0	0.129481	0.759904	1.74126
EMP2	3	2	0	0	2	0	0.129481	0.759904	1.74126
EPS8L2	3	2	0	0	2	0	0.129481	0.759904	1.74126
EXD1	3	2	2	0	0	0	0.129481	0.759904	0
FBXL6	3	2	2	0	0	0	0.129481	0.759904	0
GDE1	3	2	0	0	2	0	0.129481	0.759904	1.74126
GDF15	3	2	1	1	0	0	0.129481	0.759904	0
GEFT	3	2	0	0	2	2	0.129481	0.759904	0
GNA12	3	2	0	0	2	1	0.129481	0.759904	1.04811
GOLGA2B	3	2	0	1	1	0	0.129481	0.759904	0.693147
GSG2	3	2	0	2	0	0	0.129481	0.759904	0
KDELR1	3	2	1	0	1	1	0.129481	0.759904	0
KIAA0556	3	2	0	0	2	4	0.129481	0.759904	-1.99574
KIAA1191	3	2	0	0	2	0	0.129481	0.759904	1.74126
KIF3C	3	2	0	1	1	1	0.129481	0.759904	0
KLHL9	3	2	1	1	0	0	0.129481	0.759904	0
LOC646471	3	2	1	1	0	0	0.129481	0.759904	0
LRP12	3	2	0	0	2	1	0.129481	0.759904	1.04811
LRP3	3	2	1	0	1	0	0.129481	0.759904	0.693147
MEA1	3	2	0	1	1	0	0.129481	0.759904	0.693147
MS4A13	3	2	0	0	2	0	0.129481	0.759904	1.74126
MSRB2	3	2	0	0	2	1	0.129481	0.759904	1.04811
NAB1	3	2	0	0	2	0	0.129481	0.759904	1.74126
NICN1	3	2	0	0	2	2	0.129481	0.759904	0
NMD3	3	2	1	0	1	1	0.129481	0.759904	0
NTN1	3	2	0	0	2	0	0.129481	0.759904	1.74126
PACSIN3	3	2	1	0	1	0	0.129481	0.759904	0.693147
PCDHGA1	3	2	0	0	2	1	0.129481	0.759904	1.04811
PCDHGA10	3	2	0	0	2	1	0.129481	0.759904	1.04811
PCDHGA2	3	2	0	0	2	1	0.129481	0.759904	1.04811
PCDHGA3	3	2	0	0	2	1	0.129481	0.759904	1.04811
PCDHGA4	3	2	0	0	2	1	0.129481	0.759904	1.04811
PCDHGA5	3	2	0	0	2	1	0.129481	0.759904	1.04811
PCDHGA6	3	2	0	0	2	1	0.129481	0.759904	1.04811
PCDHGA7	3	2	0	0	2	1	0.129481	0.759904	1.04811
PCDHGA8	3	2	0	0	2	1	0.129481	0.759904	1.04811
PCDHGA9	3	2	0	0	2	1	0.129481	0.759904	1.04811
PCDHGB1	3	2	0	0	2	1	0.129481	0.759904	1.04811
PCDHGB2	3	2	0	0	2	1	0.129481	0.759904	1.04811
PCDHGB3	3	2	0	0	2	1	0.129481	0.759904	1.04811
PCDHGB4	3	2	0	0	2	1	0.129481	0.759904	1.04811
PCDHGB5	3	2	0	0	2	1	0.129481	0.759904	1.04811
PCDHGB6	3	2	0	0	2	1	0.129481	0.759904	1.04811
PDE10A	3	2	0	0	2	0	0.129481	0.759904	1.74126
PDHA1	3	2	0	0	2	1	0.129481	0.759904	1.04811
PFDN6	3	2	0	1	1	1	0.129481	0.759904	0
PIK3IP1	3	2	1	0	1	0	0.129481	0.759904	0.693147
PLA2G4C	3	2	0	1	1	1	0.129481	0.759904	0
PLEKHA8	3	2	0	0	2	0	0.129481	0.759904	1.74126
PLIN3	3	2	0	0	2	0	0.129481	0.759904	1.74126
PORCN	3	2	0	1	1	0	0.129481	0.759904	0.693147
PRPF4B	3	2	1	0	1	0	0.129481	0.759904	0.693147
PSMB4	3	2	0	2	0	0	0.129481	0.759904	0
RNF5	3	2	0	0	2	0	0.129481	0.759904	1.74126
RNF5P1	3	2	0	0	2	0	0.129481	0.759904	1.74126
SARM1	3	2	0	0	2	0	0.129481	0.759904	1.74126
SEC13	3	2	0	0	2	2	0.129481	0.759904	0
SERINC1	3	2	0	0	2	0	0.129481	0.759904	1.74126
SH2B1	3	2	2	0	0	0	0.129481	0.759904	0
SH2D5	3	2	1	0	1	0	0.129481	0.759904	0.693147
SLC12A9	3	2	1	1	0	0	0.129481	0.759904	0
SLC17A9	3	2	0	0	2	0	0.129481	0.759904	1.74126
SMPDL3B	3	2	0	1	1	0	0.129481	0.759904	0.693147
SNHG5	3	2	1	0	1	1	0.129481	0.759904	0
SORBS1	3	2	0	0	2	1	0.129481	0.759904	1.04811
SPC24	3	2	1	0	1	0	0.129481	0.759904	0.693147
SPCS3	3	2	1	0	1	0	0.129481	0.759904	0.693147
SRM	3	2	0	1	1	0	0.129481	0.759904	0.693147
ST3GAL6	3	2	0	1	1	2	0.129481	0.759904	-1.04811
STARD10	3	2	1	1	0	0	0.129481	0.759904	0
STK32C	3	2	0	0	2	0	0.129481	0.759904	1.74126
TLR5	3	2	1	0	1	1	0.129481	0.759904	0
TMEM147	3	2	0	0	2	0	0.129481	0.759904	1.74126
TMEM54	3	2	0	0	2	0	0.129481	0.759904	1.74126
TNFAIP1	3	2	0	0	2	1	0.129481	0.759904	1.04811
UCHL1	3	2	0	0	2	1	0.129481	0.759904	1.04811
WDR24	3	2	1	1	0	0	0.129481	0.759904	0
ZFC3H1	3	2	1	1	0	0	0.129481	0.759904	0
ZNF131	3	2	0	1	1	3	0.129481	0.759904	-2.07944
ZNF2	3	2	0	2	0	0	0.129481	0.759904	0
ZNF248	3	2	0	1	1	0	0.129481	0.759904	0.693147
ZNF260	3	2	0	0	2	0	0.129481	0.759904	1.74126
ZNF365	3	2	0	0	2	1	0.129481	0.759904	1.04811
ZNF438	3	2	0	0	2	0	0.129481	0.759904	1.74126
ZNF551	3	2	1	1	0	0	0.129481	0.759904	0
ZNF620	3	2	0	0	2	1	0.129481	0.759904	1.04811
DOHH	21	6	0	0	6	4	0.130003	0.759904	1.72586
IQSEC1	21	6	0	0	6	2	0.130003	0.759904	3.7216
MED24	21	6	0	0	6	3	0.130003	0.759904	2.69027
NR1D1	21	6	1	1	4	2	0.130003	0.759904	1.99574
PRDM2	21	6	1	1	4	0	0.130003	0.759904	3.737
PUS7L	21	6	2	0	4	3	0.130003	0.759904	0.96441
AAAS	0	1	1	0	0	0	0.130166	0.759904	0
ABCA4	0	1	0	0	1	0	0.130166	0.759904	0.693147
ABCC11	0	1	1	0	0	0	0.130166	0.759904	0
ABCF1	0	1	0	0	1	0	0.130166	0.759904	0.693147
ACAA1	0	1	0	0	1	0	0.130166	0.759904	0.693147
ACER2	0	1	0	0	1	0	0.130166	0.759904	0.693147
ADAM29	0	1	0	0	1	0	0.130166	0.759904	0.693147
ADM	0	1	0	0	1	1	0.130166	0.759904	0
AKR1C1	0	1	0	0	1	1	0.130166	0.759904	0
ALOX12P2	0	1	0	0	1	0	0.130166	0.759904	0.693147
ALS2CR8	0	1	0	0	1	0	0.130166	0.759904	0.693147
ANKRD23	0	1	1	0	0	0	0.130166	0.759904	0
ANKS4B	0	1	0	0	1	0	0.130166	0.759904	0.693147
AOC3	0	1	0	1	0	0	0.130166	0.759904	0
APLF	0	1	0	0	1	3	0.130166	0.759904	-2.07944
APOA1	0	1	1	0	0	0	0.130166	0.759904	0
APOBEC3F	0	1	0	0	1	0	0.130166	0.759904	0.693147
APOE	0	1	0	0	1	0	0.130166	0.759904	0.693147
ARC	0	1	1	0	0	0	0.130166	0.759904	0
ARHGAP11A	0	1	0	0	1	0	0.130166	0.759904	0.693147
ARL1	0	1	0	0	1	0	0.130166	0.759904	0.693147
ATP13A3	0	1	0	0	1	0	0.130166	0.759904	0.693147
ATP13A4	0	1	0	0	1	1	0.130166	0.759904	0
AVPI1	0	1	1	0	0	0	0.130166	0.759904	0
B3GALT1	0	1	0	0	1	1	0.130166	0.759904	0
B3GNT8	0	1	0	0	1	0	0.130166	0.759904	0.693147
BAHD1	0	1	0	0	1	1	0.130166	0.759904	0
BCL10	0	1	0	0	1	0	0.130166	0.759904	0.693147
BIRC3	0	1	0	0	1	0	0.130166	0.759904	0.693147
BLID	0	1	1	0	0	0	0.130166	0.759904	0
BLNK	0	1	0	0	1	0	0.130166	0.759904	0.693147
BMP2	0	1	0	1	0	0	0.130166	0.759904	0
BRD4	0	1	0	0	1	0	0.130166	0.759904	0.693147
BZRAP1	0	1	0	0	1	0	0.130166	0.759904	0.693147
C10orf93	0	1	1	0	0	0	0.130166	0.759904	0
C12orf26	0	1	0	0	1	2	0.130166	0.759904	-1.04811
C14orf148	0	1	0	0	1	0	0.130166	0.759904	0.693147
C14orf165	0	1	0	0	1	0	0.130166	0.759904	0.693147
C14orf183	0	1	0	0	1	0	0.130166	0.759904	0.693147
C15orf28	0	1	1	0	0	0	0.130166	0.759904	0
C17orf105	0	1	0	0	1	0	0.130166	0.759904	0.693147
C17orf56	0	1	0	0	1	0	0.130166	0.759904	0.693147
C17orf57	0	1	0	0	1	0	0.130166	0.759904	0.693147
C18orf45	0	1	0	0	1	0	0.130166	0.759904	0.693147
C19orf51	0	1	0	1	0	0	0.130166	0.759904	0
C1orf103	0	1	0	0	1	0	0.130166	0.759904	0.693147
C1orf204	0	1	0	0	1	0	0.130166	0.759904	0.693147
C1orf220	0	1	0	0	1	0	0.130166	0.759904	0.693147
C1orf52	0	1	0	0	1	1	0.130166	0.759904	0
C1orf61	0	1	0	0	1	0	0.130166	0.759904	0.693147
C1QTNF8	0	1	0	0	1	0	0.130166	0.759904	0.693147
C21orf122	0	1	1	0	0	0	0.130166	0.759904	0
C22orf45	0	1	0	0	1	0	0.130166	0.759904	0.693147
C5AR1	0	1	0	0	1	0	0.130166	0.759904	0.693147
C6orf154	0	1	0	1	0	1	0.130166	0.759904	-0.693147
C6orf176	0	1	0	0	1	0	0.130166	0.759904	0.693147
C6orf201	0	1	0	0	1	0	0.130166	0.759904	0.693147
C9orf119	0	1	0	0	1	0	0.130166	0.759904	0.693147
C9orf21	0	1	1	0	0	0	0.130166	0.759904	0
CABP7	0	1	1	0	0	0	0.130166	0.759904	0
CALCOCO2	0	1	0	0	1	0	0.130166	0.759904	0.693147
CARD6	0	1	0	0	1	0	0.130166	0.759904	0.693147
CCDC140	0	1	0	0	1	0	0.130166	0.759904	0.693147
CCDC27	0	1	1	0	0	0	0.130166	0.759904	0
CCDC96	0	1	0	1	0	0	0.130166	0.759904	0
CD244	0	1	0	0	1	0	0.130166	0.759904	0.693147
CD300LF	0	1	1	0	0	0	0.130166	0.759904	0
CD40	0	1	0	0	1	0	0.130166	0.759904	0.693147
CD46	0	1	0	0	1	1	0.130166	0.759904	0
CD9	0	1	0	0	1	0	0.130166	0.759904	0.693147
CHPF2	0	1	1	0	0	0	0.130166	0.759904	0
CHST2	0	1	0	1	0	0	0.130166	0.759904	0
CHTF18	0	1	0	0	1	0	0.130166	0.759904	0.693147
CLCNKB	0	1	0	0	1	0	0.130166	0.759904	0.693147
CMTM1	0	1	0	0	1	0	0.130166	0.759904	0.693147
CNR2	0	1	0	0	1	0	0.130166	0.759904	0.693147
COG2	0	1	0	0	1	0	0.130166	0.759904	0.693147
COL1A1	0	1	0	0	1	0	0.130166	0.759904	0.693147
CORO6	0	1	0	0	1	0	0.130166	0.759904	0.693147
COX5B	0	1	0	0	1	2	0.130166	0.759904	-1.04811
CUEDC1	0	1	0	0	1	0	0.130166	0.759904	0.693147
CUZD1	0	1	0	0	1	0	0.130166	0.759904	0.693147
CYB561D1	0	1	0	0	1	0	0.130166	0.759904	0.693147
CYP1A1	0	1	0	0	1	0	0.130166	0.759904	0.693147
DDX25	0	1	0	0	1	0	0.130166	0.759904	0.693147
DLC1	0	1	0	0	1	0	0.130166	0.759904	0.693147
DNAH9	0	1	0	0	1	0	0.130166	0.759904	0.693147
DNLZ	0	1	0	0	1	0	0.130166	0.759904	0.693147
DPYSL4	0	1	0	0	1	0	0.130166	0.759904	0.693147
DTX3	0	1	1	0	0	0	0.130166	0.759904	0
DUSP5	0	1	0	1	0	0	0.130166	0.759904	0
ECHDC1	0	1	0	0	1	0	0.130166	0.759904	0.693147
EFCAB6	0	1	0	0	1	0	0.130166	0.759904	0.693147
EIF4E1B	0	1	0	1	0	0	0.130166	0.759904	0
EME2	0	1	1	0	0	0	0.130166	0.759904	0
EMR1	0	1	0	0	1	0	0.130166	0.759904	0.693147
EMX2OS	0	1	0	0	1	0	0.130166	0.759904	0.693147
ENDOU	0	1	0	0	1	0	0.130166	0.759904	0.693147
EXD2	0	1	0	0	1	0	0.130166	0.759904	0.693147
F3	0	1	0	0	1	0	0.130166	0.759904	0.693147
FAAH2	0	1	0	0	1	0	0.130166	0.759904	0.693147
FABP3	0	1	0	1	0	0	0.130166	0.759904	0
FADS3	0	1	0	0	1	0	0.130166	0.759904	0.693147
FAM101B	0	1	0	1	0	0	0.130166	0.759904	0
FAM160A2	0	1	0	0	1	0	0.130166	0.759904	0.693147
FAM166A	0	1	0	1	0	0	0.130166	0.759904	0
FAM173A	0	1	1	0	0	0	0.130166	0.759904	0
FAM182B	0	1	0	0	1	0	0.130166	0.759904	0.693147
FAM66A	0	1	0	0	1	0	0.130166	0.759904	0.693147
FAM9A	0	1	0	0	1	0	0.130166	0.759904	0.693147
FCGRT	0	1	0	0	1	0	0.130166	0.759904	0.693147
FGF5	0	1	0	0	1	0	0.130166	0.759904	0.693147
FGFR4	0	1	0	0	1	0	0.130166	0.759904	0.693147
FOLR2	0	1	1	0	0	0	0.130166	0.759904	0
FOXO3B	0	1	1	0	0	0	0.130166	0.759904	0
FREM3	0	1	0	0	1	0	0.130166	0.759904	0.693147
FRMD1	0	1	0	0	1	0	0.130166	0.759904	0.693147
GABRB2	0	1	0	0	1	0	0.130166	0.759904	0.693147
GAD2	0	1	0	0	1	0	0.130166	0.759904	0.693147
GAL3ST4	0	1	1	0	0	0	0.130166	0.759904	0
GBX1	0	1	0	0	1	0	0.130166	0.759904	0.693147
GIPC1	0	1	0	0	1	1	0.130166	0.759904	0
GJD3	0	1	0	1	0	0	0.130166	0.759904	0
GLP1R	0	1	0	0	1	0	0.130166	0.759904	0.693147
GNB3	0	1	0	0	1	0	0.130166	0.759904	0.693147
GPER	0	1	1	0	0	0	0.130166	0.759904	0
GPN2	0	1	1	0	0	0	0.130166	0.759904	0
GPRASP1	0	1	1	0	0	0	0.130166	0.759904	0
GPT	0	1	1	0	0	0	0.130166	0.759904	0
GRIP2	0	1	0	0	1	0	0.130166	0.759904	0.693147
HAMP	0	1	0	1	0	0	0.130166	0.759904	0
HEPHL1	0	1	0	1	0	0	0.130166	0.759904	0
HES6	0	1	1	0	0	0	0.130166	0.759904	0
HIST1H1E	0	1	0	1	0	0	0.130166	0.759904	0
HIST1H4A	0	1	0	1	0	0	0.130166	0.759904	0
HIST1H4B	0	1	1	0	0	0	0.130166	0.759904	0
HIST4H4	0	1	0	1	0	0	0.130166	0.759904	0
HNF4G	0	1	0	0	1	0	0.130166	0.759904	0.693147
HOXB8	0	1	0	0	1	0	0.130166	0.759904	0.693147
HR	0	1	1	0	0	0	0.130166	0.759904	0
HRH4	0	1	0	0	1	0	0.130166	0.759904	0.693147
HSPB7	0	1	0	1	0	0	0.130166	0.759904	0
IER5	0	1	0	1	0	0	0.130166	0.759904	0
IGSF1	0	1	0	1	0	0	0.130166	0.759904	0
IL1B	0	1	0	1	0	0	0.130166	0.759904	0
IQGAP3	0	1	0	0	1	1	0.130166	0.759904	0
IRAK3	0	1	0	0	1	0	0.130166	0.759904	0.693147
IRAK4	0	1	0	0	1	0	0.130166	0.759904	0.693147
ISCU	0	1	0	0	1	0	0.130166	0.759904	0.693147
ITGA10	0	1	0	1	0	0	0.130166	0.759904	0
IZUMO1	0	1	1	0	0	2	0.130166	0.759904	-1.74126
JAKMIP1	0	1	0	0	1	1	0.130166	0.759904	0
JPH3	0	1	0	0	1	0	0.130166	0.759904	0.693147
KBTBD12	0	1	0	0	1	0	0.130166	0.759904	0.693147
KCNJ12	0	1	0	0	1	0	0.130166	0.759904	0.693147
KCNK10	0	1	0	0	1	0	0.130166	0.759904	0.693147
KCNK13	0	1	0	0	1	0	0.130166	0.759904	0.693147
KCNRG	0	1	1	0	0	0	0.130166	0.759904	0
KHDRBS2	0	1	0	0	1	0	0.130166	0.759904	0.693147
LGI3	0	1	0	0	1	0	0.130166	0.759904	0.693147
LGMN	0	1	0	0	1	0	0.130166	0.759904	0.693147
LHX5	0	1	0	0	1	0	0.130166	0.759904	0.693147
LOC100125556	0	1	0	0	1	1	0.130166	0.759904	0
LOC151174	0	1	0	1	0	0	0.130166	0.759904	0
LOC254559	0	1	0	0	1	0	0.130166	0.759904	0.693147
LOC285074	0	1	0	0	1	0	0.130166	0.759904	0.693147
LOC285733	0	1	0	1	0	2	0.130166	0.759904	-1.74126
LOC338758	0	1	0	1	0	0	0.130166	0.759904	0
LOC340357	0	1	0	0	1	0	0.130166	0.759904	0.693147
LOC389333	0	1	0	1	0	0	0.130166	0.759904	0
LOC643677	0	1	1	0	0	0	0.130166	0.759904	0
LOC647979	0	1	1	0	0	0	0.130166	0.759904	0
LOC723809	0	1	0	0	1	1	0.130166	0.759904	0
LOC729668	0	1	1	0	0	0	0.130166	0.759904	0
LRRC16B	0	1	0	0	1	0	0.130166	0.759904	0.693147
LRTM2	0	1	0	0	1	0	0.130166	0.759904	0.693147
LYPD5	0	1	0	0	1	0	0.130166	0.759904	0.693147
MATN4	0	1	1	0	0	0	0.130166	0.759904	0
MCAT	0	1	0	0	1	0	0.130166	0.759904	0.693147
MDGA2	0	1	0	0	1	0	0.130166	0.759904	0.693147
MDH1B	0	1	0	0	1	0	0.130166	0.759904	0.693147
MEF2D	0	1	0	1	0	1	0.130166	0.759904	-0.693147
MEOX1	0	1	0	0	1	0	0.130166	0.759904	0.693147
METTL14	0	1	0	0	1	0	0.130166	0.759904	0.693147
METTL7B	0	1	1	0	0	0	0.130166	0.759904	0
MFAP2	0	1	0	0	1	0	0.130166	0.759904	0.693147
MFAP5	0	1	0	0	1	0	0.130166	0.759904	0.693147
MGC15885	0	1	0	1	0	0	0.130166	0.759904	0
MGC21881	0	1	0	1	0	0	0.130166	0.759904	0
MIR611	0	1	0	1	0	0	0.130166	0.759904	0
MLH3	0	1	0	0	1	0	0.130166	0.759904	0.693147
MMP14	0	1	1	0	0	0	0.130166	0.759904	0
MPZ	0	1	0	0	1	1	0.130166	0.759904	0
MS4A2	0	1	1	0	0	0	0.130166	0.759904	0
MTMR14	0	1	0	1	0	0	0.130166	0.759904	0
MYCN	0	1	0	1	0	0	0.130166	0.759904	0
NAT6	0	1	0	1	0	0	0.130166	0.759904	0
NCRNA00094	0	1	0	1	0	0	0.130166	0.759904	0
NCRNA00159	0	1	0	0	1	0	0.130166	0.759904	0.693147
NDUFB7	0	1	0	0	1	0	0.130166	0.759904	0.693147
NEUROD2	0	1	1	0	0	0	0.130166	0.759904	0
NPY1R	0	1	0	1	0	0	0.130166	0.759904	0
NRGN	0	1	0	0	1	0	0.130166	0.759904	0.693147
NTN5	0	1	0	1	0	0	0.130166	0.759904	0
NUMBL	0	1	0	0	1	1	0.130166	0.759904	0
OMD	0	1	0	1	0	0	0.130166	0.759904	0
OR2L13	0	1	0	0	1	1	0.130166	0.759904	0
OR4F6	0	1	1	0	0	0	0.130166	0.759904	0
PCDHGC3	0	1	0	1	0	0	0.130166	0.759904	0
PDCL2	0	1	1	0	0	0	0.130166	0.759904	0
PEA15	0	1	0	0	1	0	0.130166	0.759904	0.693147
PIRT	0	1	0	0	1	0	0.130166	0.759904	0.693147
PLCD4	0	1	0	0	1	0	0.130166	0.759904	0.693147
PMPCB	0	1	0	0	1	1	0.130166	0.759904	0
POLR2G	0	1	0	0	1	0	0.130166	0.759904	0.693147
POLR3F	0	1	0	0	1	1	0.130166	0.759904	0
POU3F3	0	1	1	0	0	0	0.130166	0.759904	0
PPIEL	0	1	0	0	1	0	0.130166	0.759904	0.693147
PPP1R14C	0	1	0	1	0	2	0.130166	0.759904	-1.74126
PPP2R2D	0	1	0	0	1	0	0.130166	0.759904	0.693147
PRO0611	0	1	1	0	0	0	0.130166	0.759904	0
PSMB1	0	1	0	0	1	1	0.130166	0.759904	0
PSMC4	0	1	0	0	1	0	0.130166	0.759904	0.693147
PTGIS	0	1	0	0	1	0	0.130166	0.759904	0.693147
PTPN5	0	1	0	1	0	0	0.130166	0.759904	0
R3HDML	0	1	0	0	1	0	0.130166	0.759904	0.693147
RAB5B	0	1	0	0	1	1	0.130166	0.759904	0
RAB7A	0	1	0	0	1	1	0.130166	0.759904	0
RABL2B	0	1	0	0	1	0	0.130166	0.759904	0.693147
RASSF6	0	1	0	0	1	0	0.130166	0.759904	0.693147
RPL23AP82	0	1	0	1	0	0	0.130166	0.759904	0
RPS2P32	0	1	0	1	0	0	0.130166	0.759904	0
RRN3P2	0	1	0	0	1	0	0.130166	0.759904	0.693147
RWDD2A	0	1	0	0	1	0	0.130166	0.759904	0.693147
S100B	0	1	0	0	1	0	0.130166	0.759904	0.693147
SDHAP3	0	1	0	0	1	0	0.130166	0.759904	0.693147
SEC61G	0	1	0	0	1	1	0.130166	0.759904	0
SEMA3B	0	1	0	0	1	0	0.130166	0.759904	0.693147
SEPT4	0	1	1	0	0	0	0.130166	0.759904	0
SERPINE1	0	1	0	1	0	0	0.130166	0.759904	0
SERPINE3	0	1	0	1	0	0	0.130166	0.759904	0
SEZ6	0	1	0	0	1	0	0.130166	0.759904	0.693147
SFTPC	0	1	0	1	0	0	0.130166	0.759904	0
SLC35C2	0	1	1	0	0	0	0.130166	0.759904	0
SLC6A11	0	1	0	0	1	0	0.130166	0.759904	0.693147
SLC9A3R2	0	1	0	0	1	0	0.130166	0.759904	0.693147
SLC9A4	0	1	0	0	1	1	0.130166	0.759904	0
SMPD2	0	1	0	1	0	1	0.130166	0.759904	-0.693147
SNORA68	0	1	1	0	0	0	0.130166	0.759904	0
SNORA76	0	1	0	1	0	0	0.130166	0.759904	0
SNORD18A	0	1	0	1	0	0	0.130166	0.759904	0
SNORD42B	0	1	1	0	0	0	0.130166	0.759904	0
SNORD4B	0	1	0	1	0	0	0.130166	0.759904	0
SOX8	0	1	0	1	0	0	0.130166	0.759904	0
SPA17	0	1	0	0	1	0	0.130166	0.759904	0.693147
SRPX2	0	1	1	0	0	0	0.130166	0.759904	0
ST8SIA5	0	1	0	0	1	0	0.130166	0.759904	0.693147
STAT2	0	1	0	0	1	1	0.130166	0.759904	0
STS	0	1	0	0	1	0	0.130166	0.759904	0.693147
STX4	0	1	0	0	1	0	0.130166	0.759904	0.693147
SYF2	0	1	0	0	1	0	0.130166	0.759904	0.693147
SYNGR2	0	1	0	0	1	0	0.130166	0.759904	0.693147
SYNPR	0	1	0	0	1	0	0.130166	0.759904	0.693147
TAC4	0	1	0	0	1	0	0.130166	0.759904	0.693147
TBKBP1	0	1	1	0	0	0	0.130166	0.759904	0
TCTEX1D1	0	1	0	0	1	0	0.130166	0.759904	0.693147
TECRL	0	1	0	0	1	0	0.130166	0.759904	0.693147
TERF2IP	0	1	1	0	0	1	0.130166	0.759904	-0.693147
TFAMP1	0	1	0	1	0	0	0.130166	0.759904	0
THSD1	0	1	0	0	1	0	0.130166	0.759904	0.693147
THY1	0	1	0	0	1	0	0.130166	0.759904	0.693147
TIMM23	0	1	0	0	1	0	0.130166	0.759904	0.693147
TMEM169	0	1	0	0	1	0	0.130166	0.759904	0.693147
TMEM200A	0	1	0	1	0	0	0.130166	0.759904	0
TRIM28	0	1	0	0	1	0	0.130166	0.759904	0.693147
TRIM39	0	1	0	1	0	0	0.130166	0.759904	0
TRIM58	0	1	0	0	1	0	0.130166	0.759904	0.693147
TSN	0	1	0	0	1	0	0.130166	0.759904	0.693147
TSPAN7	0	1	0	0	1	0	0.130166	0.759904	0.693147
TUBB2B	0	1	0	0	1	0	0.130166	0.759904	0.693147
TUBB2C	0	1	1	0	0	0	0.130166	0.759904	0
TUSC5	0	1	1	0	0	0	0.130166	0.759904	0
UBE2S	0	1	0	1	0	1	0.130166	0.759904	-0.693147
UGT3A1	0	1	0	0	1	0	0.130166	0.759904	0.693147
VAMP3	0	1	0	0	1	0	0.130166	0.759904	0.693147
VRK3	0	1	0	0	1	1	0.130166	0.759904	0
WDR1	0	1	1	0	0	1	0.130166	0.759904	-0.693147
WDR75	0	1	0	0	1	0	0.130166	0.759904	0.693147
WDR88	0	1	0	0	1	0	0.130166	0.759904	0.693147
WIPI2	0	1	0	0	1	0	0.130166	0.759904	0.693147
WWC1	0	1	0	1	0	0	0.130166	0.759904	0
YPEL4	0	1	1	0	0	0	0.130166	0.759904	0
ZBTB22	0	1	1	0	0	0	0.130166	0.759904	0
ZFP112	0	1	0	1	0	0	0.130166	0.759904	0
ZFP28	0	1	0	1	0	0	0.130166	0.759904	0
ZNF155	0	1	0	0	1	1	0.130166	0.759904	0
ZNF226	0	1	0	1	0	0	0.130166	0.759904	0
ZNF23	0	1	1	0	0	0	0.130166	0.759904	0
ZNF286B	0	1	0	0	1	0	0.130166	0.759904	0.693147
ZNF319	0	1	0	1	0	0	0.130166	0.759904	0
ZNF329	0	1	0	0	1	0	0.130166	0.759904	0.693147
ZNF34	0	1	0	0	1	0	0.130166	0.759904	0.693147
ZNF470	0	1	1	0	0	0	0.130166	0.759904	0
ZNF503	0	1	0	0	1	0	0.130166	0.759904	0.693147
ZNF554	0	1	0	0	1	1	0.130166	0.759904	0
ZNF569	0	1	1	0	0	0	0.130166	0.759904	0
ZNF570	0	1	0	1	0	0	0.130166	0.759904	0
ZNF625	0	1	0	0	1	0	0.130166	0.759904	0.693147
ZNF649	0	1	0	0	1	0	0.130166	0.759904	0.693147
ZNF736	0	1	0	1	0	0	0.130166	0.759904	0
ZNF772	0	1	0	0	1	1	0.130166	0.759904	0
ZNF831	0	1	0	0	1	1	0.130166	0.759904	0
ZYX	0	1	0	1	0	0	0.130166	0.759904	0
AFMID	7	3	0	0	3	5	0.131149	0.759904	-1.85904
AGL	7	3	0	1	2	2	0.131149	0.759904	0
AGRP	7	3	1	0	2	0	0.131149	0.759904	1.74126
B4GALT2	7	3	1	0	2	2	0.131149	0.759904	0
BCMO1	7	3	2	0	1	2	0.131149	0.759904	-1.04811
C17orf59	7	3	3	0	0	0	0.131149	0.759904	0
C19orf60	7	3	1	0	2	0	0.131149	0.759904	1.74126
CCDC88C	7	3	0	0	3	1	0.131149	0.759904	2.07944
CLCN7	7	3	0	0	3	1	0.131149	0.759904	2.07944
CNTROB	7	3	2	1	0	0	0.131149	0.759904	0
COMTD1	7	3	1	1	1	0	0.131149	0.759904	0.693147
CPXM1	7	3	0	0	3	0	0.131149	0.759904	2.77259
DCUN1D5	7	3	0	0	3	2	0.131149	0.759904	1.03133
DPF2	7	3	0	0	3	2	0.131149	0.759904	1.03133
ECH1	7	3	1	2	0	5	0.131149	0.759904	-4.63163
ETAA1	7	3	1	0	2	1	0.131149	0.759904	1.04811
EXOSC5	7	3	1	0	2	1	0.131149	0.759904	1.04811
FAM189B	7	3	1	1	1	1	0.131149	0.759904	0
FAM36A	7	3	1	0	2	1	0.131149	0.759904	1.04811
FAM76A	7	3	0	0	3	0	0.131149	0.759904	2.77259
FUZ	7	3	1	1	1	0	0.131149	0.759904	0.693147
GPM6B	7	3	0	0	3	0	0.131149	0.759904	2.77259
HNRNPU	7	3	2	1	0	0	0.131149	0.759904	0
INO80E	7	3	0	0	3	3	0.131149	0.759904	0
ITFG2	7	3	0	0	3	1	0.131149	0.759904	2.07944
KLHL32	7	3	0	0	3	0	0.131149	0.759904	2.77259
LAMB2	7	3	2	0	1	0	0.131149	0.759904	0.693147
LPCAT1	7	3	1	0	2	0	0.131149	0.759904	1.74126
LRRC8C	7	3	1	0	2	0	0.131149	0.759904	1.74126
NME2	7	3	2	0	1	1	0.131149	0.759904	0
NSUN3	7	3	0	0	3	1	0.131149	0.759904	2.07944
PAK1IP1	7	3	0	0	3	2	0.131149	0.759904	1.03133
PHC2	7	3	0	0	3	0	0.131149	0.759904	2.77259
PICK1	7	3	1	0	2	0	0.131149	0.759904	1.74126
POLD1	7	3	0	0	3	1	0.131149	0.759904	2.07944
PPP1R14B	7	3	0	0	3	5	0.131149	0.759904	-1.85904
PVRL1	7	3	0	0	3	1	0.131149	0.759904	2.07944
RAB13	7	3	1	0	2	0	0.131149	0.759904	1.74126
RAP1A	7	3	0	0	3	1	0.131149	0.759904	2.07944
REEP5	7	3	1	0	2	0	0.131149	0.759904	1.74126
REXO1	7	3	1	0	2	0	0.131149	0.759904	1.74126
RNF165	7	3	0	0	3	2	0.131149	0.759904	1.03133
RPS6KA6	7	3	0	0	3	1	0.131149	0.759904	2.07944
SEPT7	7	3	0	0	3	0	0.131149	0.759904	2.77259
SIX3	7	3	2	1	0	3	0.131149	0.759904	-2.77259
SMARCAD1	7	3	0	1	2	2	0.131149	0.759904	0
SSH1	7	3	0	0	3	1	0.131149	0.759904	2.07944
TMEM129	7	3	0	0	3	0	0.131149	0.759904	2.77259
TMEM161B	7	3	0	0	3	1	0.131149	0.759904	2.07944
TUBGCP5	7	3	0	3	0	2	0.131149	0.759904	-1.74126
ZDHHC21	7	3	1	1	1	1	0.131149	0.759904	0
ZNF815	7	3	0	2	1	0	0.131149	0.759904	0.693147
SLC9A8	42	10	0	0	10	7	0.131793	0.76274	2.05703
RPGRIP1	104	21	2	1	18	14	0.131812	0.76274	1.92771
DNAJC15	37	9	0	0	9	5	0.136655	0.789206	3.01739
HLCS	37	9	1	1	7	1	0.136655	0.789206	5.54518
SOHLH2	37	9	0	1	8	9	0.136655	0.789206	-0.683985
CTPS2	32	8	2	5	1	2	0.141264	0.811553	-1.04811
ENOX2	32	8	0	0	8	2	0.141264	0.811553	5.22378
HIGD2B	32	8	2	0	6	7	0.141264	0.811553	-0.775464
KLHDC8A	32	8	0	1	7	4	0.141264	0.811553	2.50133
MLLT10	32	8	1	0	7	10	0.141264	0.811553	-2.05703
SEC14L2	32	8	5	3	0	0	0.141264	0.811553	0
SPERT	32	8	0	0	8	4	0.141264	0.811553	3.22804
ZC3HAV1	32	8	0	1	7	4	0.141264	0.811553	2.50133
RBL1	65	14	0	0	14	16	0.141783	0.814003	-1.0006
C11orf80	43	10	1	0	9	9	0.144571	0.815452	0
C8orf86	43	10	4	1	5	3	0.144571	0.815452	1.85904
CLEC16A	27	7	0	1	6	3	0.145317	0.815452	2.69027
CTBP2	27	7	0	0	7	12	0.145317	0.815452	-3.25312
RAB12	27	7	0	0	7	6	0.145317	0.815452	0.775464
RARB	27	7	0	1	6	8	0.145317	0.815452	-1.50218
RASIP1	27	7	0	2	5	4	0.145317	0.815452	0.894632
REPS1	27	7	1	1	5	3	0.145317	0.815452	1.85904
SEMA5A	27	7	0	0	7	5	0.145317	0.815452	1.60669
TOE1	27	7	0	2	5	2	0.145317	0.815452	2.89037
UBAP2L	27	7	2	1	4	2	0.145317	0.815452	1.99574
ACO2	12	4	0	0	4	1	0.145346	0.815452	3.04385
ASXL2	12	4	1	0	3	0	0.145346	0.815452	2.77259
CDC42SE1	12	4	0	1	3	1	0.145346	0.815452	2.07944
CRLF1	12	4	0	2	2	2	0.145346	0.815452	0
CTDSP1	12	4	2	0	2	1	0.145346	0.815452	1.04811
GPATCH4	12	4	0	0	4	1	0.145346	0.815452	3.04385
HEG1	12	4	0	1	3	1	0.145346	0.815452	2.07944
IDI1	12	4	0	0	4	0	0.145346	0.815452	3.737
IGFBP2	12	4	0	0	4	1	0.145346	0.815452	3.04385
LIMK2	12	4	0	0	4	1	0.145346	0.815452	3.04385
LOC283314	12	4	1	1	2	0	0.145346	0.815452	1.74126
NOG	12	4	1	3	0	0	0.145346	0.815452	0
NUDT19	12	4	1	2	1	1	0.145346	0.815452	0
PCDH15	12	4	0	0	4	3	0.145346	0.815452	0.96441
PIH1D1	12	4	1	1	2	0	0.145346	0.815452	1.74126
PLEC	12	4	0	0	4	4	0.145346	0.815452	0
PRSS30P	12	4	2	2	0	0	0.145346	0.815452	0
RNF10	12	4	2	0	2	1	0.145346	0.815452	1.04811
STK11	12	4	2	0	2	1	0.145346	0.815452	1.04811
STOX2	12	4	1	1	2	1	0.145346	0.815452	1.04811
TMED8	12	4	0	0	4	1	0.145346	0.815452	3.04385
TRIM37	12	4	0	2	2	3	0.145346	0.815452	-1.03133
WIZ	12	4	0	0	4	2	0.145346	0.815452	1.99574
ZNF397	12	4	0	0	4	3	0.145346	0.815452	0.96441
UBE2G1	165	31	1	0	30	20	0.145378	0.815452	3.64014
ADAM9	22	6	0	1	5	4	0.148268	0.823948	0.894632
APOLD1	22	6	0	2	4	1	0.148268	0.823948	3.04385
EIF2C1	22	6	1	2	3	2	0.148268	0.823948	1.03133
IFT88	22	6	1	1	4	2	0.148268	0.823948	1.99574
LOC100302640	22	6	0	0	6	2	0.148268	0.823948	3.7216
SAFB	22	6	0	0	6	2	0.148268	0.823948	3.7216
SGK223	22	6	0	0	6	0	0.148268	0.823948	5.46286
TNKS	22	6	0	0	6	7	0.148268	0.823948	-0.775464
USP11	22	6	0	0	6	5	0.148268	0.823948	0.831229
NAALADL2	60	13	0	0	13	7	0.14869	0.823948	3.8095
ACTN4	17	5	1	0	4	1	0.14905	0.823948	3.04385
BAT1	17	5	1	0	4	2	0.14905	0.823948	1.99574
BTBD1	17	5	0	1	4	3	0.14905	0.823948	0.96441
CCDC64	17	5	0	0	5	0	0.14905	0.823948	4.63163
FAM200B	17	5	0	0	5	1	0.14905	0.823948	3.93848
GAS2	17	5	0	0	5	2	0.14905	0.823948	2.89037
KCTD20	17	5	0	0	5	5	0.14905	0.823948	0
KIAA1949	17	5	4	1	0	0	0.14905	0.823948	0
MEIG1	17	5	0	0	5	3	0.14905	0.823948	1.85904
STXBP5	17	5	0	1	4	3	0.14905	0.823948	0.96441
XKR6	17	5	0	0	5	2	0.14905	0.823948	2.89037
ZMAT3	17	5	0	0	5	4	0.14905	0.823948	0.894632
ZNF689	17	5	3	0	2	2	0.14905	0.823948	0
LOC100271722	38	9	2	2	5	1	0.150638	0.831682	3.93848
TNFRSF1A	38	9	1	0	8	4	0.150638	0.831682	3.22804
WRAP53	49	11	0	0	11	11	0.150901	0.832609	0
CAMTA1	142	27	0	0	27	26	0.151856	0.837352	0.347756
C1orf43	66	14	2	0	12	14	0.152431	0.83947	-1.08862
DCST1	66	14	2	1	11	10	0.152431	0.83947	0.612942
DCAKD	107	21	1	0	20	24	0.156445	0.853121	-1.57549
C3orf26	33	8	0	0	8	2	0.156678	0.853121	5.22378
CAPZA1	33	8	0	1	7	3	0.156678	0.853121	3.46574
TMEM26	44	10	3	3	4	5	0.15796	0.853121	-0.894632
SPEN	78	16	0	1	15	15	0.158052	0.853121	0
C16orf45	28	7	0	0	7	8	0.162472	0.853121	-0.726712
CHIC1	28	7	1	3	3	3	0.162472	0.853121	0
HMGA1	28	7	1	0	6	5	0.162472	0.853121	0.831229
UBR1	28	7	1	0	6	3	0.162472	0.853121	2.69027
ADAMTS9	8	3	1	0	2	0	0.163673	0.853121	1.74126
AGA	8	3	0	0	3	1	0.163673	0.853121	2.07944
AGAP1	8	3	0	0	3	3	0.163673	0.853121	0
AHNAK	8	3	0	0	3	6	0.163673	0.853121	-2.69027
ARL6IP1	8	3	1	0	2	3	0.163673	0.853121	-1.03133
ATP11B	8	3	0	1	2	0	0.163673	0.853121	1.74126
C10orf2	8	3	2	1	0	0	0.163673	0.853121	0
C10orf25	8	3	2	1	0	0	0.163673	0.853121	0
C3orf71	8	3	2	1	0	0	0.163673	0.853121	0
C6orf97	8	3	0	0	3	0	0.163673	0.853121	2.77259
DNAJB12	8	3	0	2	1	0	0.163673	0.853121	0.693147
FBXW5	8	3	3	0	0	0	0.163673	0.853121	0
FOSL1	8	3	0	0	3	2	0.163673	0.853121	1.03133
FTSJ3	8	3	1	2	0	1	0.163673	0.853121	-0.693147
GBA2	8	3	0	1	2	0	0.163673	0.853121	1.74126
GDI2	8	3	1	0	2	1	0.163673	0.853121	1.04811
GFPT2	8	3	0	0	3	2	0.163673	0.853121	1.03133
GK5	8	3	0	0	3	0	0.163673	0.853121	2.77259
GTF2F1	8	3	1	0	2	2	0.163673	0.853121	0
HNRNPH3	8	3	0	1	2	1	0.163673	0.853121	1.04811
ITGA2B	8	3	2	1	0	0	0.163673	0.853121	0
KAT2A	8	3	1	1	1	1	0.163673	0.853121	0
KIAA0020	8	3	0	0	3	1	0.163673	0.853121	2.07944
LOC100130557	8	3	2	1	0	0	0.163673	0.853121	0
LOC645676	8	3	2	1	0	0	0.163673	0.853121	0
MAGEF1	8	3	1	2	0	0	0.163673	0.853121	0
MESDC2	8	3	0	0	3	3	0.163673	0.853121	0
MPPE1	8	3	0	0	3	1	0.163673	0.853121	2.07944
MPV17	8	3	0	0	3	0	0.163673	0.853121	2.77259
N4BP2L2	8	3	0	1	2	2	0.163673	0.853121	0
NAIF1	8	3	0	3	0	1	0.163673	0.853121	-0.693147
NMB	8	3	1	1	1	1	0.163673	0.853121	0
NUDT6	8	3	0	0	3	0	0.163673	0.853121	2.77259
PDE4B	8	3	0	0	3	4	0.163673	0.853121	-0.96441
PDPK1	8	3	0	3	0	0	0.163673	0.853121	0
PGRMC1	8	3	0	0	3	2	0.163673	0.853121	1.03133
PRDX5	8	3	0	1	2	0	0.163673	0.853121	1.74126
PRPSAP1	8	3	2	0	1	0	0.163673	0.853121	0.693147
RBP2	8	3	0	0	3	1	0.163673	0.853121	2.07944
RGS9BP	8	3	2	1	0	0	0.163673	0.853121	0
SHISA3	8	3	0	2	1	1	0.163673	0.853121	0
SLK	8	3	0	1	2	0	0.163673	0.853121	1.74126
SRR	8	3	0	0	3	0	0.163673	0.853121	2.77259
STK32B	8	3	0	0	3	6	0.163673	0.853121	-2.69027
TAOK2	8	3	1	0	2	0	0.163673	0.853121	1.74126
TIMM50	8	3	0	1	2	0	0.163673	0.853121	1.74126
TMBIM4	8	3	1	0	2	3	0.163673	0.853121	-1.03133
WDFY4	8	3	0	0	3	2	0.163673	0.853121	1.03133
WSB1	8	3	0	0	3	1	0.163673	0.853121	2.07944
RNF207	50	11	2	2	7	7	0.163743	0.853121	0
BCAT1	102	20	3	0	17	12	0.164321	0.853121	2.56119
WDR81	73	15	0	3	12	10	0.166214	0.853121	1.19609
CSRP3	23	6	0	0	6	2	0.167609	0.853121	3.7216
GJC1	23	6	0	2	4	1	0.167609	0.853121	3.04385
GPATCH1	23	6	0	0	6	2	0.167609	0.853121	3.7216
SEPT6	23	6	2	1	3	1	0.167609	0.853121	2.07944
USP6NL	23	6	0	1	5	5	0.167609	0.853121	0
PLCB4	79	16	0	0	16	11	0.168419	0.853121	2.67236
ANAPC13	18	5	4	0	1	1	0.17126	0.853121	0
CC2D2A	18	5	0	0	5	3	0.17126	0.853121	1.85904
CLIP2	18	5	0	0	5	4	0.17126	0.853121	0.894632
COLEC11	18	5	1	0	4	8	0.17126	0.853121	-3.22804
CREB3L4	18	5	0	2	3	1	0.17126	0.853121	2.07944
FLJ39534	18	5	0	0	5	2	0.17126	0.853121	2.89037
GARNL3	18	5	0	1	4	4	0.17126	0.853121	0
HEXIM1	18	5	3	2	0	0	0.17126	0.853121	0
IRAK1	18	5	1	0	4	0	0.17126	0.853121	3.737
KIAA0114	18	5	1	3	1	1	0.17126	0.853121	0
LARP7	18	5	0	1	4	5	0.17126	0.853121	-0.894632
MARS	18	5	0	0	5	1	0.17126	0.853121	3.93848
PTAR1	18	5	0	0	5	4	0.17126	0.853121	0.894632
RPL7L1	18	5	0	0	5	4	0.17126	0.853121	0.894632
RSL1D1	18	5	0	2	3	3	0.17126	0.853121	0
ZHX2	18	5	1	0	4	4	0.17126	0.853121	0
ANXA4	13	4	1	0	3	3	0.171579	0.853121	0
ARX	13	4	0	1	3	0	0.171579	0.853121	2.77259
ATL2	13	4	1	0	3	0	0.171579	0.853121	2.77259
C15orf34	13	4	0	4	0	0	0.171579	0.853121	0
CCDC43	13	4	0	0	4	1	0.171579	0.853121	3.04385
CCNT1	13	4	1	0	3	1	0.171579	0.853121	2.07944
CLPP	13	4	0	0	4	0	0.171579	0.853121	3.737
CRYZL1	13	4	1	0	3	4	0.171579	0.853121	-0.96441
EIF2B5	13	4	1	2	1	1	0.171579	0.853121	0
FAM35A	13	4	0	0	4	3	0.171579	0.853121	0.96441
GSK3B	13	4	0	0	4	4	0.171579	0.853121	0
HNRNPA2B1	13	4	2	0	2	4	0.171579	0.853121	-1.99574
KCTD3	13	4	0	0	4	2	0.171579	0.853121	1.99574
KIAA1984	13	4	1	2	1	1	0.171579	0.853121	0
LIPT1	13	4	0	1	3	0	0.171579	0.853121	2.77259
LOC139201	13	4	3	1	0	0	0.171579	0.853121	0
OIP5	13	4	0	0	4	2	0.171579	0.853121	1.99574
PGAP3	13	4	1	0	3	1	0.171579	0.853121	2.07944
PHGDH	13	4	0	0	4	1	0.171579	0.853121	3.04385
PIK3CD	13	4	0	1	3	4	0.171579	0.853121	-0.96441
PLAUR	13	4	0	1	3	4	0.171579	0.853121	-0.96441
PMM2	13	4	0	1	3	1	0.171579	0.853121	2.07944
RNF214	13	4	1	1	2	3	0.171579	0.853121	-1.03133
SLC19A1	13	4	0	0	4	3	0.171579	0.853121	0.96441
SSRP1	13	4	0	1	3	1	0.171579	0.853121	2.07944
STC2	13	4	3	1	0	0	0.171579	0.853121	0
TMEM57	13	4	1	1	2	1	0.171579	0.853121	1.04811
UBA1	13	4	0	0	4	0	0.171579	0.853121	3.737
WHSC2	13	4	0	0	4	0	0.171579	0.853121	3.737
ZNF343	13	4	0	0	4	4	0.171579	0.853121	0
ZNF629	13	4	1	0	3	1	0.171579	0.853121	2.07944
DHRS13	34	8	1	1	6	3	0.172846	0.853121	2.69027
DTNB	34	8	1	0	7	2	0.172846	0.853121	4.49707
SH3GL3	109	21	0	0	21	27	0.174182	0.853121	-2.2348
ATXN7L1	51	11	0	0	11	5	0.177103	0.853121	4.27667
ACVR2B	4	2	0	0	2	1	0.177978	0.853121	1.04811
ANKRD19	4	2	0	0	2	1	0.177978	0.853121	1.04811
ANO1	4	2	0	0	2	2	0.177978	0.853121	0
APOA1BP	4	2	2	0	0	1	0.177978	0.853121	-0.693147
ARHGEF10L	4	2	0	0	2	0	0.177978	0.853121	1.74126
BCAP31	4	2	1	1	0	1	0.177978	0.853121	-0.693147
BEND7	4	2	0	0	2	0	0.177978	0.853121	1.74126
BOD1	4	2	1	0	1	0	0.177978	0.853121	0.693147
BTG4	4	2	0	0	2	1	0.177978	0.853121	1.04811
C18orf8	4	2	0	0	2	0	0.177978	0.853121	1.74126
C1QTNF1	4	2	1	1	0	1	0.177978	0.853121	-0.693147
C2orf65	4	2	0	0	2	1	0.177978	0.853121	1.04811
C5orf55	4	2	1	1	0	0	0.177978	0.853121	0
C9orf142	4	2	0	0	2	0	0.177978	0.853121	1.74126
CAPN9	4	2	0	0	2	0	0.177978	0.853121	1.74126
CBY1	4	2	0	0	2	4	0.177978	0.853121	-1.99574
CCDC163P	4	2	0	1	1	0	0.177978	0.853121	0.693147
CCT6P1	4	2	1	0	1	0	0.177978	0.853121	0.693147
CHCHD2	4	2	0	0	2	1	0.177978	0.853121	1.04811
CLDN20	4	2	0	0	2	4	0.177978	0.853121	-1.99574
COX8A	4	2	0	0	2	0	0.177978	0.853121	1.74126
CSF1	4	2	0	1	1	1	0.177978	0.853121	0
DLG4	4	2	1	1	0	2	0.177978	0.853121	-1.74126
DPEP1	4	2	0	0	2	2	0.177978	0.853121	0
EGLN1	4	2	1	1	0	0	0.177978	0.853121	0
ERCC1	4	2	1	1	0	1	0.177978	0.853121	-0.693147
FBXL16	4	2	1	1	0	0	0.177978	0.853121	0
FBXO28	4	2	0	1	1	1	0.177978	0.853121	0
FLJ40852	4	2	0	1	1	0	0.177978	0.853121	0.693147
FSD1	4	2	0	0	2	1	0.177978	0.853121	1.04811
GLI2	4	2	0	0	2	4	0.177978	0.853121	-1.99574
GMPPA	4	2	1	0	1	0	0.177978	0.853121	0.693147
GSTP1	4	2	0	1	1	1	0.177978	0.853121	0
HNRNPUL2	4	2	0	1	1	2	0.177978	0.853121	-1.04811
KDM5C	4	2	0	1	1	1	0.177978	0.853121	0
LENG8	4	2	1	0	1	0	0.177978	0.853121	0.693147
LOC153684	4	2	1	1	0	0	0.177978	0.853121	0
LOC25845	4	2	1	1	0	2	0.177978	0.853121	-1.74126
LOC646982	4	2	0	0	2	0	0.177978	0.853121	1.74126
LOC653653	4	2	1	1	0	0	0.177978	0.853121	0
MAFG	4	2	0	1	1	4	0.177978	0.853121	-3.04385
MAP7D3	4	2	0	1	1	1	0.177978	0.853121	0
MAPK12	4	2	0	0	2	0	0.177978	0.853121	1.74126
MBOAT1	4	2	1	0	1	0	0.177978	0.853121	0.693147
MCL1	4	2	0	2	0	1	0.177978	0.853121	-0.693147
MIF	4	2	1	1	0	0	0.177978	0.853121	0
MPP6	4	2	0	0	2	2	0.177978	0.853121	0
MSR1	4	2	0	0	2	0	0.177978	0.853121	1.74126
NBEAL1	4	2	0	0	2	0	0.177978	0.853121	1.74126
NCAM2	4	2	0	0	2	1	0.177978	0.853121	1.04811
NCS1	4	2	0	0	2	1	0.177978	0.853121	1.04811
NDUFV1	4	2	0	0	2	1	0.177978	0.853121	1.04811
NEIL2	4	2	0	0	2	0	0.177978	0.853121	1.74126
NKX3-2	4	2	0	0	2	0	0.177978	0.853121	1.74126
NT5C	4	2	1	1	0	0	0.177978	0.853121	0
NT5DC3	4	2	0	0	2	0	0.177978	0.853121	1.74126
OBSL1	4	2	1	1	0	0	0.177978	0.853121	0
PCYT2	4	2	1	0	1	0	0.177978	0.853121	0.693147
PIWIL2	4	2	0	1	1	1	0.177978	0.853121	0
POLR3G	4	2	0	0	2	0	0.177978	0.853121	1.74126
POMT1	4	2	0	2	0	1	0.177978	0.853121	-0.693147
PPP2R5A	4	2	0	1	1	0	0.177978	0.853121	0.693147
PQLC2	4	2	1	0	1	0	0.177978	0.853121	0.693147
PRND	4	2	0	2	0	0	0.177978	0.853121	0
PSEN2	4	2	1	0	1	0	0.177978	0.853121	0.693147
RAB11FIP3	4	2	1	0	1	0	0.177978	0.853121	0.693147
RAB35	4	2	0	0	2	0	0.177978	0.853121	1.74126
RAC1	4	2	0	0	2	1	0.177978	0.853121	1.04811
RBM15	4	2	2	0	0	0	0.177978	0.853121	0
REEP3	4	2	1	0	1	4	0.177978	0.853121	-3.04385
RFXAP	4	2	0	0	2	0	0.177978	0.853121	1.74126
RGL2	4	2	1	1	0	1	0.177978	0.853121	-0.693147
RNPEP	4	2	1	0	1	0	0.177978	0.853121	0.693147
RRBP1	4	2	0	0	2	1	0.177978	0.853121	1.04811
SELT	4	2	0	0	2	0	0.177978	0.853121	1.74126
SEPT8	4	2	1	1	0	3	0.177978	0.853121	-2.77259
SFRS6	4	2	0	1	1	1	0.177978	0.853121	0
SHE	4	2	1	1	0	0	0.177978	0.853121	0
SLC16A14	4	2	0	0	2	3	0.177978	0.853121	-1.03133
SLC26A2	4	2	0	0	2	0	0.177978	0.853121	1.74126
SLC38A10	4	2	0	0	2	0	0.177978	0.853121	1.74126
SLC6A9	4	2	0	0	2	1	0.177978	0.853121	1.04811
SLCO3A1	4	2	1	0	1	0	0.177978	0.853121	0.693147
SMARCB1	4	2	0	0	2	0	0.177978	0.853121	1.74126
SMO	4	2	0	1	1	1	0.177978	0.853121	0
SNHG9	4	2	1	0	1	0	0.177978	0.853121	0.693147
SOCS6	4	2	0	0	2	0	0.177978	0.853121	1.74126
STRADB	4	2	0	0	2	0	0.177978	0.853121	1.74126
STRAP	4	2	0	1	1	1	0.177978	0.853121	0
SYNPO2	4	2	0	0	2	0	0.177978	0.853121	1.74126
TAS1R1	4	2	0	0	2	1	0.177978	0.853121	1.04811
TBP	4	2	0	0	2	1	0.177978	0.853121	1.04811
TENC1	4	2	0	0	2	3	0.177978	0.853121	-1.03133
TEX264	4	2	0	0	2	1	0.177978	0.853121	1.04811
TRIB1	4	2	0	0	2	0	0.177978	0.853121	1.74126
TRIM45	4	2	0	1	1	1	0.177978	0.853121	0
TSHZ1	4	2	0	1	1	3	0.177978	0.853121	-2.07944
TSPAN13	4	2	0	0	2	0	0.177978	0.853121	1.74126
UFSP1	4	2	2	0	0	0	0.177978	0.853121	0
UNC5CL	4	2	1	0	1	1	0.177978	0.853121	0
VANGL1	4	2	1	0	1	0	0.177978	0.853121	0.693147
VSX2	4	2	0	0	2	0	0.177978	0.853121	1.74126
ZC3H18	4	2	0	0	2	0	0.177978	0.853121	1.74126
ZNF200	4	2	0	2	0	1	0.177978	0.853121	-0.693147
ZNF302	4	2	1	0	1	0	0.177978	0.853121	0.693147
ZNF408	4	2	1	1	0	1	0.177978	0.853121	-0.693147
ZNF696	4	2	0	0	2	0	0.177978	0.853121	1.74126
COL2A1	29	7	0	1	6	4	0.180482	0.853121	1.72586
JAM2	29	7	0	0	7	7	0.180482	0.853121	0
KIAA0427	29	7	0	0	7	4	0.180482	0.853121	2.50133
NBAS	29	7	0	0	7	6	0.180482	0.853121	0.775464
ZNF114	29	7	0	1	6	1	0.180482	0.853121	4.76971
BCL2L1	40	9	1	3	5	7	0.180595	0.853121	-1.60669
BST2	40	9	1	3	5	5	0.180595	0.853121	0
MSH3	40	9	0	0	9	10	0.180595	0.853121	-0.646333
PCYT1B	128	24	1	3	20	19	0.18357	0.853121	0.425169
IER2	46	10	1	3	6	10	0.186469	0.853121	-2.83249
CNBP	24	6	0	0	6	4	0.187938	0.853121	1.72586
JUNB	24	6	4	2	0	0	0.187938	0.853121	0
RAD9B	24	6	0	0	6	1	0.187938	0.853121	4.76971
RFTN2	24	6	0	0	6	5	0.187938	0.853121	0.831229
ZMYND11	24	6	1	1	4	2	0.187938	0.853121	1.99574
PRICKLE1	35	8	0	2	6	2	0.189721	0.853121	3.7216
SLC35F1	35	8	0	0	8	9	0.189721	0.853121	-0.683985
ANKRD11	52	11	0	0	11	9	0.190959	0.853121	1.25928
C11orf41	52	11	6	5	0	1	0.190959	0.853121	-0.693147
MIR548F3	52	11	0	0	11	4	0.190959	0.853121	5.1713
CNKSR3	58	12	1	1	10	5	0.194399	0.853121	3.66372
MLL5	58	12	0	1	11	6	0.194399	0.853121	3.44544
B3GNT1	19	5	1	4	0	0	0.194646	0.853121	0
COQ9	19	5	0	0	5	3	0.194646	0.853121	1.85904
HIPK2	19	5	0	0	5	0	0.194646	0.853121	4.63163
HTT	19	5	0	0	5	1	0.194646	0.853121	3.93848
KANK1	19	5	0	0	5	4	0.194646	0.853121	0.894632
LOC253724	19	5	0	1	4	1	0.194646	0.853121	3.04385
MRRF	19	5	0	0	5	4	0.194646	0.853121	0.894632
NCOR1	19	5	0	0	5	7	0.194646	0.853121	-1.60669
RALGPS1	19	5	0	0	5	3	0.194646	0.853121	1.85904
SEC22B	19	5	0	0	5	2	0.194646	0.853121	2.89037
SLC11A2	19	5	0	0	5	3	0.194646	0.853121	1.85904
SLC43A1	19	5	0	0	5	2	0.194646	0.853121	2.89037
SLMAP	19	5	0	0	5	1	0.194646	0.853121	3.93848
TDRD3	19	5	0	0	5	1	0.194646	0.853121	3.93848
WDR45	19	5	0	0	5	0	0.194646	0.853121	4.63163
ZC3H7B	19	5	0	2	3	2	0.194646	0.853121	1.03133
CAPRIN1	41	9	0	0	9	13	0.196499	0.853121	-2.39881
ABHD2	9	3	0	1	2	2	0.198249	0.853121	0
ANGPTL5	9	3	1	1	1	2	0.198249	0.853121	-1.04811
AQP11	9	3	0	0	3	1	0.198249	0.853121	2.07944
ARMC1	9	3	0	0	3	0	0.198249	0.853121	2.77259
ARPP19	9	3	0	0	3	1	0.198249	0.853121	2.07944
ASS1	9	3	0	0	3	3	0.198249	0.853121	0
BEND3	9	3	0	3	0	2	0.198249	0.853121	-1.74126
CNTNAP1	9	3	0	3	0	0	0.198249	0.853121	0
CORO2B	9	3	0	0	3	4	0.198249	0.853121	-0.96441
CPEB2	9	3	0	2	1	2	0.198249	0.853121	-1.04811
CSPP1	9	3	0	0	3	1	0.198249	0.853121	2.07944
CYBASC3	9	3	1	1	1	2	0.198249	0.853121	-1.04811
DRAM2	9	3	0	0	3	0	0.198249	0.853121	2.77259
EDEM2	9	3	0	1	2	1	0.198249	0.853121	1.04811
EEF2K	9	3	0	1	2	0	0.198249	0.853121	1.74126
EPS8	9	3	0	1	2	0	0.198249	0.853121	1.74126
FAM176A	9	3	0	0	3	1	0.198249	0.853121	2.07944
GLT8D1	9	3	0	1	2	2	0.198249	0.853121	0
GPSM1	9	3	0	0	3	4	0.198249	0.853121	-0.96441
H2AFY	9	3	0	1	2	0	0.198249	0.853121	1.74126
KIAA1109	9	3	0	0	3	0	0.198249	0.853121	2.77259
KLHL21	9	3	0	1	2	1	0.198249	0.853121	1.04811
LEPREL2	9	3	0	2	1	1	0.198249	0.853121	0
LOC100288730	9	3	1	2	0	0	0.198249	0.853121	0
LRRC58	9	3	1	0	2	0	0.198249	0.853121	1.74126
MNAT1	9	3	0	0	3	2	0.198249	0.853121	1.03133
NAT10	9	3	0	0	3	0	0.198249	0.853121	2.77259
NOC3L	9	3	1	0	2	0	0.198249	0.853121	1.74126
NUDT1	9	3	0	0	3	1	0.198249	0.853121	2.07944
NUDT9	9	3	1	0	2	2	0.198249	0.853121	0
PCCA	9	3	0	0	3	1	0.198249	0.853121	2.07944
PTCH2	9	3	1	1	1	0	0.198249	0.853121	0.693147
PWWP2B	9	3	0	0	3	1	0.198249	0.853121	2.07944
RDH10	9	3	1	1	1	0	0.198249	0.853121	0.693147
RETSAT	9	3	0	0	3	0	0.198249	0.853121	2.77259
RHOT1	9	3	0	0	3	1	0.198249	0.853121	2.07944
RUSC1	9	3	1	2	0	0	0.198249	0.853121	0
SAFB2	9	3	0	1	2	1	0.198249	0.853121	1.04811
SEPW1	9	3	0	0	3	2	0.198249	0.853121	1.03133
SLC37A4	9	3	0	1	2	2	0.198249	0.853121	0
SLC38A6	9	3	1	1	1	2	0.198249	0.853121	-1.04811
TCEAL1	9	3	3	0	0	1	0.198249	0.853121	-0.693147
TG	9	3	0	0	3	0	0.198249	0.853121	2.77259
TMED2	9	3	1	0	2	1	0.198249	0.853121	1.04811
TNFRSF10A	9	3	0	0	3	1	0.198249	0.853121	2.07944
TPRG1	9	3	0	0	3	0	0.198249	0.853121	2.77259
TRAF4	9	3	0	0	3	3	0.198249	0.853121	0
TRIM38	9	3	2	0	1	0	0.198249	0.853121	0.693147
TRIM62	9	3	0	0	3	1	0.198249	0.853121	2.07944
TRIM7	9	3	0	3	0	1	0.198249	0.853121	-0.693147
TSC22D3	9	3	0	0	3	4	0.198249	0.853121	-0.96441
ULK4	9	3	0	0	3	2	0.198249	0.853121	1.03133
ZNF3	9	3	0	0	3	1	0.198249	0.853121	2.07944
ZNF512B	9	3	1	0	2	1	0.198249	0.853121	1.04811
ZNF616	9	3	0	0	3	2	0.198249	0.853121	1.03133
AP2B1	30	7	0	0	7	5	0.19928	0.853121	1.60669
C4orf45	30	7	0	1	6	8	0.19928	0.853121	-1.50218
LAMB1	30	7	0	1	6	4	0.19928	0.853121	1.72586
LRTOMT	30	7	0	0	7	6	0.19928	0.853121	0.775464
NAT15	30	7	0	1	6	5	0.19928	0.853121	0.831229
NCRNA00263	30	7	2	1	4	2	0.19928	0.853121	1.99574
PDK3	30	7	0	1	6	4	0.19928	0.853121	1.72586
RAP1GAP2	30	7	0	0	7	5	0.19928	0.853121	1.60669
SBNO2	30	7	0	0	7	3	0.19928	0.853121	3.46574
TAOK3	30	7	1	0	6	3	0.19928	0.853121	2.69027
TIPIN	30	7	0	0	7	8	0.19928	0.853121	-0.726712
AP4M1	14	4	0	1	3	1	0.199287	0.853121	2.07944
ASXL1	14	4	0	1	3	2	0.199287	0.853121	1.03133
BDH1	14	4	0	3	1	3	0.199287	0.853121	-2.07944
C19orf39	14	4	2	2	0	1	0.199287	0.853121	-0.693147
CAMK1D	14	4	0	0	4	2	0.199287	0.853121	1.99574
DDX3X	14	4	1	2	1	2	0.199287	0.853121	-1.04811
DUSP5P	14	4	0	0	4	2	0.199287	0.853121	1.99574
FAM117B	14	4	0	1	3	1	0.199287	0.853121	2.07944
GSTA4	14	4	0	0	4	4	0.199287	0.853121	0
HMHA1	14	4	0	2	2	1	0.199287	0.853121	1.04811
IGF2BP3	14	4	0	0	4	2	0.199287	0.853121	1.99574
JUB	14	4	1	0	3	3	0.199287	0.853121	0
MASTL	14	4	3	1	0	1	0.199287	0.853121	-0.693147
PPP2R3C	14	4	2	1	1	0	0.199287	0.853121	0.693147
PRR3	14	4	0	3	1	0	0.199287	0.853121	0.693147
SALL1	14	4	1	0	3	1	0.199287	0.853121	2.07944
SEC11A	14	4	0	2	2	4	0.199287	0.853121	-1.99574
SERPINF1	14	4	0	0	4	2	0.199287	0.853121	1.99574
SPTAN1	14	4	0	1	3	0	0.199287	0.853121	2.77259
TRAPPC9	14	4	1	0	3	3	0.199287	0.853121	0
TRIP4	14	4	0	0	4	0	0.199287	0.853121	3.737
LOC100131691	47	10	0	0	10	5	0.201532	0.853121	3.66372
RYR2	94	18	5	1	12	13	0.202659	0.853121	-0.556387
PARD3B	53	11	0	0	11	5	0.205285	0.853121	4.27667
PFKM	53	11	0	0	11	4	0.205285	0.853121	5.1713
PRMT3	53	11	0	1	10	6	0.205285	0.853121	2.83249
CDH9	36	8	0	1	7	5	0.207255	0.853121	1.60669
FBXW4	36	8	0	1	7	3	0.207255	0.853121	3.46574
MARCH10	36	8	2	0	6	3	0.207255	0.853121	2.69027
TMEM91	36	8	0	0	8	5	0.207255	0.853121	2.33341
TXNDC15	36	8	2	2	4	2	0.207255	0.853121	1.99574
PTPRA	59	12	0	1	11	12	0.208073	0.853121	-0.583143
BFSP1	25	6	0	1	5	5	0.209156	0.853121	0
KDM6B	25	6	1	2	3	4	0.209156	0.853121	-0.96441
MAP3K8	25	6	0	2	4	6	0.209156	0.853121	-1.72586
SACM1L	25	6	1	0	5	4	0.209156	0.853121	0.894632
SLC9A11	25	6	1	1	4	4	0.209156	0.853121	0
TFAP2A	25	6	1	1	4	3	0.209156	0.853121	0.96441
MYRIP	95	18	0	1	17	22	0.213565	0.853121	-2.13097
PBX1	48	10	1	0	9	6	0.217091	0.853121	2.18616
C15orf44	31	7	1	0	6	2	0.218795	0.853121	3.7216
DGKB	31	7	0	0	7	6	0.218795	0.853121	0.775464
HHIP	31	7	0	0	7	5	0.218795	0.853121	1.60669
IQCJ	31	7	0	1	6	6	0.218795	0.853121	0
KIF13B	31	7	0	0	7	2	0.218795	0.853121	4.49707
SCHIP1	31	7	0	0	7	8	0.218795	0.853121	-0.726712
TRDMT1	31	7	0	1	6	9	0.218795	0.853121	-2.18616
PTPRG	138	25	0	0	25	18	0.218833	0.853121	2.80672
C20orf26	20	5	0	0	5	1	0.219057	0.853121	3.93848
CHRM5	20	5	0	0	5	4	0.219057	0.853121	0.894632
CHST7	20	5	0	0	5	4	0.219057	0.853121	0.894632
COL24A1	20	5	1	1	3	1	0.219057	0.853121	2.07944
INADL	20	5	0	0	5	4	0.219057	0.853121	0.894632
RBBP8	20	5	0	3	2	5	0.219057	0.853121	-2.89037
TNK2	20	5	0	1	4	2	0.219057	0.853121	1.99574
WNK3	20	5	4	0	1	2	0.219057	0.853121	-1.04811
ZNF341	20	5	0	0	5	3	0.219057	0.853121	1.85904
SLC39A1	54	11	0	2	9	6	0.220054	0.853121	2.18616
PDCD1LG2	60	12	1	3	8	13	0.222149	0.853121	-3.08279
LHFP	66	13	0	1	12	12	0.223577	0.853121	0
ATP9A	37	8	2	1	5	5	0.225391	0.853121	0
ATXN7	37	8	0	0	8	3	0.225391	0.853121	4.19245
MAP2	37	8	0	0	8	7	0.225391	0.853121	0.726712
C12orf24	15	4	1	2	1	3	0.228208	0.853121	-2.07944
C18orf22	15	4	0	0	4	1	0.228208	0.853121	3.04385
C19orf23	15	4	1	2	1	1	0.228208	0.853121	0
CCDC57	15	4	0	0	4	1	0.228208	0.853121	3.04385
CPNE1	15	4	0	1	3	0	0.228208	0.853121	2.77259
FCHO2	15	4	0	0	4	1	0.228208	0.853121	3.04385
KCTD15	15	4	1	0	3	2	0.228208	0.853121	1.03133
KIAA0232	15	4	0	0	4	2	0.228208	0.853121	1.99574
[truncated: 6,788 more rows]

## Sheet: Low WNT + RSPO positive reg.
	Unsorted cells	Sorted cells					Derived from columns B and C		Derived from columns F and G
	All GT insertions in genes	Inactivating GT insertions in genes	Sense GT insetions in exons	Antisense GT insetions in exons	Sense GT insetions in introns	Antisense GT insetions in introns	p-value	FDR-corrected p-value	IGTIOB score
Total for dataset:	208561	23932	2346	2401	19185	16299
Gene
LGR4	167	163	9	7	147	24	2.31796e-71	1.7744e-67	21.0792
CNOT2	12	75	1	0	74	1	4.76473e-61	1.8237e-57	26.1997
LRP6	38	89	6	11	72	6	8.89503e-58	1.89271e-54	21.0943
AXIN2	2	61	1	0	60	15	9.89007e-58	1.89271e-54	13.2902
DOT1L	31	65	2	1	62	2	3.75624e-41	5.7508e-38	23.0234
CNOT3	7	40	5	3	32	8	9.82895e-33	1.25401e-29	10.6727
TFAP4	79	74	7	9	58	42	1.33348e-32	1.45825e-29	3.57743
CTNNB1	4	30	0	2	28	3	7.38679e-26	7.06823e-23	13.5857
PIGL	29	44	3	2	39	3	3.24432e-25	2.75947e-22	16.8594
PIGP	49	51	10	7	34	3	2.46169e-24	1.88442e-21	15.4638
WDR20	170	86	1	2	83	18	7.8612e-24	5.47068e-21	15.8154
KEAP1	37	37	0	1	36	5	1.0513e-17	6.70644e-15	14.1793
RHOA	20	30	13	1	16	0	1.40121e-17	8.251e-15	11.5807
PIGS	7	23	4	1	18	1	1.93409e-17	1.05753e-14	11.8146
MLL	5	20	4	0	16	2	5.70194e-16	2.90989e-13	9.83939
SFRS1	29	30	6	8	16	3	6.85055e-15	3.27756e-12	8.80807
SETD1B	13	22	4	6	12	9	7.3265e-14	3.29908e-11	1.84242
FZD5	8	19	4	15	0	5	1.70147e-13	7.23597e-11	-4.63163
ERF	56	35	0	0	35	30	1.42671e-12	5.74815e-10	1.51388
GPAA1	1	13	4	3	6	3	1.85077e-12	7.08381e-10	2.69027
PIGU	17	20	0	0	20	3	4.96166e-11	1.80864e-08	10.5999
DPM3	2	12	3	8	1	2	1.0578e-10	3.68067e-08	-1.04811
PIGX	2	10	0	0	10	1	7.25759e-09	2.41552e-06	7.60221
HNRNPD	21	17	2	1	14	10	5.56408e-08	1.77471e-05	2.2847
RNF146	2	9	0	0	9	0	5.88554e-08	1.80215e-05	7.64902
PIGB	10	13	2	2	9	2	6.13675e-08	1.8068e-05	5.90776
GPC4	35	21	1	3	17	6	6.77118e-08	1.91975e-05	6.58977
PIGT	4	10	2	2	6	1	9.04695e-08	2.47337e-05	4.76971
MPDU1	34	20	0	1	19	3	1.75535e-07	4.63352e-05	10.1748
NEUROG2	5	10	1	9	0	0	2.4609e-07	6.27939e-05	0
MALAT1	93	33	11	22	0	0	3.67435e-07	9.07326e-05	0
CREBBP	33	19	0	0	19	2	4.53253e-07	0.000108427	11.2061
BCL9	80	30	0	0	30	10	4.77135e-07	0.000110409	8.71729
TRIP12	26	17	3	0	14	7	4.90386e-07	0.000110409	4.34173
NPRL3	35	19	2	0	17	3	8.89256e-07	0.000194493	9.28004
BRD9	15	13	3	3	7	2	1.2195e-06	0.000259312	4.49707
CSDE1	12	11	1	1	9	0	5.69978e-06	0.00117924	7.64902
SPEN	78	27	1	0	26	11	5.86953e-06	0.0011824	6.76304
B3GAT3	19	13	1	0	12	4	7.60002e-06	0.00149175	5.75444
RIC8A	3	7	1	4	2	0	1.10869e-05	0.00212176	1.74126
ALG8	32	16	2	1	13	6	1.40939e-05	0.00263143	4.58497
F12	11	10	5	4	1	2	1.6094e-05	0.00293333	-1.04811
PIGQ	6	8	0	1	7	3	2.13503e-05	0.00380085	3.46574
RAD54L	2	6	3	3	0	1	2.7717e-05	0.00482213	-0.693147
NONO	20	12	0	0	12	2	4.4061e-05	0.00749527	7.75018
B4GALT7	5	7	0	0	7	1	6.06499e-05	0.0100929	5.54518
PIGK	8	8	0	1	7	0	7.56483e-05	0.0120953	6.23832
DVL3	3	6	1	0	5	2	7.58426e-05	0.0120953	2.89037
KIAA0195	19	11	0	0	11	4	0.000116053	0.0175652	5.1713
TICAM1	40	16	8	5	3	2	0.000116755	0.0175652	1.03133
OMG	107	29	11	17	1	1	0.000117025	0.0175652	0
UHRF1	28	13	7	1	5	7	0.000158157	0.0232825	-1.60669
DPM1	2	5	1	3	1	0	0.000203002	0.0287775	0.693147
SLC25A1	2	5	2	1	2	1	0.000203002	0.0287775	1.04811
SNUPN	29	13	3	4	6	4	0.000207546	0.0288867	1.72586
PIGW	40	15	2	2	11	3	0.00033091	0.0452342	6.13571
C1orf213	56	18	8	10	0	0	0.00041644	0.0559272	0
HDAC7	3	5	0	0	5	0	0.000495145	0.0642429	4.63163
SLC35B2	3	5	0	2	3	1	0.000495145	0.0642429	2.07944
FRAT2	12	8	2	6	0	0	0.000506965	0.0646688	0
PIGH	1	4	0	0	4	0	0.000515323	0.0646688	3.737
ANP32A	119	29	1	0	28	17	0.000525695	0.0649064	4.30563
AHSA2	9	7	3	4	0	0	0.000603058	0.0732763	0
AXIN1	39	14	3	1	10	8	0.000734162	0.0877647	1.33032
SOLH	13	8	0	0	8	2	0.000745226	0.0877647	5.22378
MECOM	250	49	2	0	47	25	0.000785666	0.0911254	6.30603
HDGF	60	18	1	2	15	10	0.000816114	0.0932441	2.795
RHBDD3	35	13	4	5	4	7	0.000869895	0.0979271	-2.50133
KLF5	26	11	1	0	10	2	0.000919746	0.100581	6.5541
LOC100289341	26	11	1	10	0	0	0.000919746	0.100581	0
MEN1	10	7	5	1	1	0	0.000934231	0.100726	0.693147
HSPC159	72	20	9	10	1	2	0.000967229	0.102835	-1.04811
SC65	4	5	1	3	1	2	0.00101927	0.105712	-1.04811
DYSFIP1	14	8	1	6	1	1	0.00106582	0.105712	0
TXNDC15	36	13	4	5	4	2	0.00107348	0.105712	1.99574
DVL1	7	6	1	0	5	1	0.00107455	0.105712	3.93848
EIF4E1B	0	3	1	2	0	0	0.00109095	0.105712	0
JPH3	0	3	1	0	2	0	0.00109095	0.105712	1.74126
PTPRN	0	3	0	0	3	0	0.00109095	0.105712	2.77259
BAG5	2	4	3	0	1	0	0.00141911	0.134115	0.693147
HSP90B1	2	4	0	0	4	0	0.00141911	0.134115	3.737
FOSL1	8	6	0	0	6	1	0.00171697	0.158354	4.76971
HOXA11	8	6	1	1	4	0	0.00171697	0.158354	3.737
MRI1	5	5	0	2	3	1	0.00186557	0.170011	2.07944
STK11	12	7	4	1	2	1	0.00201111	0.180827	1.04811
HSBP1L1	16	8	0	0	8	2	0.0020315	0.180827	5.22378
CENPT	103	24	0	0	24	7	0.00250359	0.220287	8.70967
PIGO	9	6	2	2	2	0	0.00261341	0.227337	1.74126
PRKACB	13	7	0	0	7	1	0.00282104	0.241653	5.54518
NBR1	31	11	5	4	2	1	0.00284112	0.241653	1.04811
ADAMTS10	3	4	0	0	4	0	0.00304059	0.245008	3.737
BPGM	3	4	0	0	4	0	0.00304059	0.245008	3.737
CXXC1	3	4	1	0	3	1	0.00304059	0.245008	2.07944
MTMR11	3	4	2	2	0	0	0.00304059	0.245008	0
SNX27	3	4	1	0	3	2	0.00304059	0.245008	1.03133
SPATS2	22	9	1	1	7	6	0.00316843	0.25265	0.775464
ZCCHC8	32	11	1	2	8	3	0.00346746	0.273643	4.19245
FAM53C	10	6	0	0	6	2	0.00381962	0.290807	3.7216
INPP4A	10	6	0	0	6	1	0.00381962	0.290807	4.76971
BHLHE22	1	3	1	2	0	0	0.00402686	0.290807	0
DPH2	1	3	2	1	0	0	0.00402686	0.290807	0
LOC253039	1	3	3	0	0	0	0.00402686	0.290807	0
STYXL1	1	3	1	0	2	0	0.00402686	0.290807	1.74126
TMEM120B	1	3	0	0	3	3	0.00402686	0.290807	0
VCPIP1	1	3	1	1	1	0	0.00402686	0.290807	0.693147
VPS33B	1	3	0	0	3	0	0.00402686	0.290807	2.77259
DEPDC5	28	10	0	2	8	0	0.0041933	0.297663	6.96504
YDJC	33	11	4	2	5	1	0.00419956	0.297663	3.93848
CNOT4	19	8	1	0	7	2	0.00463182	0.318813	4.49707
THBS3	19	8	4	3	1	1	0.00463182	0.318813	0
B4GALT2	7	5	1	0	4	2	0.00491442	0.318813	1.99574
BAX	7	5	0	1	4	1	0.00491442	0.318813	3.04385
C17orf65	7	5	0	1	4	0	0.00491442	0.318813	3.737
ECH1	7	5	1	3	1	1	0.00491442	0.318813	0
FUT4	7	5	3	2	0	0	0.00491442	0.318813	0
RAD54L2	7	5	0	0	5	2	0.00491442	0.318813	2.89037
RRP8	7	5	0	0	5	0	0.00491442	0.318813	4.63163
SHROOM2	7	5	0	1	4	1	0.00491442	0.318813	3.04385
MMP25	15	7	1	5	1	0	0.00516241	0.323948	0.693147
ATP5S	11	6	1	2	3	2	0.00539346	0.323948	1.03133
FUNDC2	11	6	0	0	6	2	0.00539346	0.323948	3.7216
MOBKL2A	11	6	0	0	6	1	0.00539346	0.323948	4.76971
ANKRD13B	4	4	0	0	4	2	0.00558604	0.323948	1.99574
C4orf49	4	4	2	0	2	0	0.00558604	0.323948	1.74126
EGLN1	4	4	2	2	0	1	0.00558604	0.323948	-0.693147
HSD17B1	4	4	0	3	1	0	0.00558604	0.323948	0.693147
KIAA1383	4	4	2	2	0	0	0.00558604	0.323948	0
MAN1A2	4	4	0	1	3	1	0.00558604	0.323948	2.07944
PASK	4	4	0	0	4	0	0.00558604	0.323948	3.737
RAP1GAP	4	4	0	0	4	1	0.00558604	0.323948	3.04385
UNC5CL	4	4	1	2	1	1	0.00558604	0.323948	0
ZFP36L2	4	4	1	3	0	0	0.00558604	0.323948	0
MRPL34	20	8	4	4	0	0	0.00590748	0.337476	0
VPS33A	20	8	0	1	7	5	0.00590748	0.337476	1.60669
LOC100128675	151	30	0	0	30	20	0.00617796	0.347305	3.64014
CDKN2A	25	9	1	0	8	3	0.00621072	0.347305	4.19245
THAP4	30	10	0	0	10	4	0.00621566	0.347305	4.55836
METTL12	16	7	3	3	1	2	0.00677014	0.36949	-1.04811
SLC20A1	16	7	4	1	2	0	0.00677014	0.36949	1.74126
BBC3	58	15	1	0	14	8	0.00685184	0.36949	3.61502
AHNAK	8	5	0	0	5	1	0.00731434	0.36949	3.93848
C10orf2	8	5	4	1	0	0	0.00731434	0.36949	0
DNAJB12	8	5	2	3	0	0	0.00731434	0.36949	0
PRDXDD1P	8	5	2	3	0	0	0.00731434	0.36949	0
PSMG3	8	5	2	3	0	0	0.00731434	0.36949	0
SFRS2	8	5	2	3	0	0	0.00731434	0.36949	0
ZNF384	8	5	1	2	2	1	0.00731434	0.36949	1.04811
PIK3R1	12	6	0	1	5	0	0.00739352	0.36949	4.63163
PRSS30P	12	6	3	3	0	0	0.00739352	0.36949	0
SGK269	12	6	0	0	6	1	0.00739352	0.36949	4.76971
SKP2	12	6	2	0	4	1	0.00739352	0.36949	3.04385
FKBP10	21	8	3	2	3	4	0.00743324	0.36949	-0.96441
SETDB1	21	8	0	0	8	2	0.00743324	0.36949	5.22378
TRIP6	21	8	4	0	4	3	0.00743324	0.36949	0.96441
EXT1	26	9	3	3	3	2	0.00760988	0.375559	1.03133
UNK	122	25	0	0	25	26	0.00845403	0.375559	-0.356847
ZNF436	17	7	4	2	1	3	0.00872134	0.375559	-2.07944
ZNF689	17	7	3	2	2	2	0.00872134	0.375559	0
SEC14L2	32	10	2	8	0	1	0.00892417	0.375559	-0.693147
ATP5D	5	4	0	0	4	0	0.00923945	0.375559	3.737
BHLHE40	5	4	1	0	3	1	0.00923945	0.375559	2.07944
C1GALT1C1	5	4	0	0	4	0	0.00923945	0.375559	3.737
CBR4	5	4	0	0	4	0	0.00923945	0.375559	3.737
IFIT5	5	4	1	0	3	1	0.00923945	0.375559	2.07944
PIGM	5	4	2	2	0	0	0.00923945	0.375559	0
RAD23B	5	4	2	1	1	0	0.00923945	0.375559	0.693147
RANBP10	5	4	0	0	4	0	0.00923945	0.375559	3.737
ALDH18A1	2	3	0	0	3	0	0.00929415	0.375559	2.77259
CEBPD	2	3	1	2	0	0	0.00929415	0.375559	0
CHMP5	2	3	0	0	3	0	0.00929415	0.375559	2.77259
FGF8	2	3	1	2	0	0	0.00929415	0.375559	0
FJX1	2	3	3	0	0	0	0.00929415	0.375559	0
MTRR	2	3	0	0	3	1	0.00929415	0.375559	2.07944
NPEPL1	2	3	0	0	3	0	0.00929415	0.375559	2.77259
OTUD5	2	3	0	0	3	1	0.00929415	0.375559	2.07944
PLD4	2	3	1	2	0	1	0.00929415	0.375559	-0.693147
SCARF2	2	3	0	0	3	0	0.00929415	0.375559	2.77259
SDF2L1	2	3	2	1	0	0	0.00929415	0.375559	0
SLC35A2	2	3	0	0	3	1	0.00929415	0.375559	2.07944
STK36	2	3	0	1	2	0	0.00929415	0.375559	1.74126
CBX5	49	13	1	1	11	2	0.00958002	0.375559	7.16704
ARID1A	13	6	1	3	2	1	0.00987771	0.375559	1.04811
DCLRE1A	13	6	4	2	0	0	0.00987771	0.375559	0
PGAP3	13	6	0	0	6	1	0.00987771	0.375559	4.76971
QTRT1	13	6	2	0	4	0	0.00987771	0.375559	3.737
LOC100129716	61	15	1	0	14	10	0.0099818	0.375559	2.2847
BAP1	9	5	0	0	5	2	0.010424	0.375559	2.89037
SENP1	9	5	2	2	1	1	0.010424	0.375559	0
STT3A	9	5	1	0	4	0	0.010424	0.375559	3.737
TPX2	9	5	0	0	5	1	0.010424	0.375559	3.93848
TRIM7	9	5	1	2	2	0	0.010424	0.375559	1.74126
C18orf45	0	2	0	0	2	1	0.0105971	0.375559	1.04811
C2CD4A	0	2	2	0	0	0	0.0105971	0.375559	0
C6orf176	0	2	0	0	2	0	0.0105971	0.375559	1.74126
C9orf116	0	2	0	1	1	0	0.0105971	0.375559	0.693147
CDKN1A	0	2	0	0	2	0	0.0105971	0.375559	1.74126
CST8	0	2	0	0	2	0	0.0105971	0.375559	1.74126
ESYT1	0	2	0	1	1	0	0.0105971	0.375559	0.693147
FAM105A	0	2	0	0	2	0	0.0105971	0.375559	1.74126
IL1RAP	0	2	0	0	2	0	0.0105971	0.375559	1.74126
LOC389333	0	2	2	0	0	0	0.0105971	0.375559	0
MRGPRE	0	2	1	1	0	0	0.0105971	0.375559	0
MTERF	0	2	0	0	2	0	0.0105971	0.375559	1.74126
MUC20	0	2	0	2	0	0	0.0105971	0.375559	0
NTRK1	0	2	0	0	2	1	0.0105971	0.375559	1.04811
PPP1R3D	0	2	1	1	0	0	0.0105971	0.375559	0
RAB21	0	2	0	0	2	0	0.0105971	0.375559	1.74126
RAB7A	0	2	0	0	2	0	0.0105971	0.375559	1.74126
RFX8	0	2	0	0	2	0	0.0105971	0.375559	1.74126
SLC35E1	0	2	1	0	1	0	0.0105971	0.375559	0.693147
STAT4	0	2	0	0	2	1	0.0105971	0.375559	1.04811
TEX261	0	2	0	0	2	0	0.0105971	0.375559	1.74126
TMED7	0	2	0	1	1	1	0.0105971	0.375559	0
TMED7-TICAM2	0	2	0	1	1	1	0.0105971	0.375559	0
TUBG2	0	2	0	0	2	0	0.0105971	0.375559	1.74126
VTRNA1-1	0	2	2	0	0	0	0.0105971	0.375559	0
MICALCL	74	17	0	0	17	6	0.0110432	0.386423	6.58977
CBS	18	7	1	0	6	2	0.0110551	0.386423	3.7216
TMEM80	18	7	0	0	7	2	0.0110551	0.386423	4.49707
GNAL	28	9	0	0	9	4	0.0111133	0.386693	3.91202
NFIB	75	17	0	0	17	1	0.0122784	0.425299	11.3595
C19orf54	34	10	2	5	3	2	0.0124537	0.427501	1.03133
TP53	34	10	1	1	8	8	0.0124537	0.427501	0
TRPV2	14	6	0	3	3	3	0.012902	0.440914	0
LOC338799	168	31	2	10	19	17	0.0130975	0.445605	0.894706
C12orf61	29	9	3	6	0	0	0.0132609	0.449169	0
SMARCA4	40	11	0	0	11	4	0.0133519	0.450259	5.1713
JUNB	24	8	3	5	0	0	0.0137942	0.455148	0
PGPEP1	24	8	3	5	0	1	0.0137942	0.455148	-0.693147
FLAD1	19	7	3	1	3	0	0.0138096	0.455148	2.77259
TLE3	19	7	2	2	3	2	0.0138096	0.455148	1.03133
HAUS2	6	4	0	2	2	0	0.0141554	0.455148	1.74126
MTTP	6	4	0	1	3	2	0.0141554	0.455148	1.03133
TFR2	6	4	1	0	3	1	0.0141554	0.455148	2.07944
TNFSF13	6	4	1	3	0	0	0.0141554	0.455148	0
TP73	6	4	0	0	4	1	0.0141554	0.455148	3.04385
LOC285847	52	13	1	3	9	7	0.0141732	0.455148	1.4107
CEBPB	10	5	3	2	0	0	0.0143293	0.455148	0
DUS1L	10	5	1	0	4	0	0.0143293	0.455148	3.737
MDP1	10	5	2	1	2	0	0.0143293	0.455148	1.74126
PRSS36	10	5	2	1	2	2	0.0143293	0.455148	0
NEIL1	41	11	4	2	5	4	0.0153974	0.486779	0.894632
IFT172	30	9	1	4	4	4	0.0157011	0.486779	0
LOC147727	30	9	7	2	0	0	0.0157011	0.486779	0
COX5A	15	6	0	0	6	3	0.0165192	0.486779	2.69027
KISS1R	15	6	0	1	5	3	0.0165192	0.486779	1.85904
LRRC31	15	6	0	5	1	0	0.0165192	0.486779	0.693147
SRA1	15	6	3	2	1	0	0.0165192	0.486779	0.693147
ZNF668	25	8	6	1	1	5	0.0166026	0.486779	-3.93848
HUS1B	20	7	1	6	0	0	0.0170219	0.486779	0
TMUB1	20	7	4	1	2	0	0.0170219	0.486779	1.74126
ARRDC3	72	16	1	2	13	14	0.0171542	0.486779	-0.532228
ARAP3	3	3	0	0	3	1	0.0171692	0.486779	2.07944
ARHGDIG	3	3	0	0	3	1	0.0171692	0.486779	2.07944
BAT5	3	3	1	1	1	0	0.0171692	0.486779	0.693147
DAGLB	3	3	0	1	2	2	0.0171692	0.486779	0
LATS2	3	3	1	0	2	0	0.0171692	0.486779	1.74126
MGC45800	3	3	3	0	0	0	0.0171692	0.486779	0
MPZL3	3	3	0	1	2	0	0.0171692	0.486779	1.74126
NICN1	3	3	0	0	3	0	0.0171692	0.486779	2.77259
NTN1	3	3	0	0	3	0	0.0171692	0.486779	2.77259
PAQR4	3	3	2	0	1	0	0.0171692	0.486779	0.693147
PFKFB4	3	3	0	0	3	0	0.0171692	0.486779	2.77259
PLXNB1	3	3	1	0	2	0	0.0171692	0.486779	1.74126
PTENP1	3	3	0	3	0	0	0.0171692	0.486779	0
RCL1	3	3	0	1	2	1	0.0171692	0.486779	1.04811
SNHG5	3	3	0	0	3	0	0.0171692	0.486779	2.77259
ST7OT4	3	3	1	0	2	0	0.0171692	0.486779	1.74126
TSPAN18	3	3	0	0	3	0	0.0171692	0.486779	2.77259
WDR53	3	3	0	0	3	1	0.0171692	0.486779	2.07944
LOC100129387	54	13	6	7	0	0	0.0180633	0.510239	0
GATAD2A	31	9	0	0	9	2	0.0184549	0.519384	5.90776
NRARP	11	5	4	1	0	0	0.0191064	0.533794	0
P2RX5	11	5	3	0	2	2	0.0191064	0.533794	0
OGT	26	8	1	2	5	4	0.0198001	0.534416	0.894632
TOM1L1	26	8	0	0	8	4	0.0198001	0.534416	3.22804
KAZALD1	55	13	5	4	4	3	0.0202865	0.534416	0.96441
AGL	7	4	1	1	2	4	0.0204551	0.534416	-1.99574
ATF5	7	4	1	0	3	2	0.0204551	0.534416	1.03133
B3GALT6	7	4	3	1	0	0	0.0204551	0.534416	0
C17orf59	7	4	1	3	0	0	0.0204551	0.534416	0
F2R	7	4	0	0	4	0	0.0204551	0.534416	3.737
INO80E	7	4	0	1	3	3	0.0204551	0.534416	0
KIAA0240	7	4	0	0	4	0	0.0204551	0.534416	3.737
LSM1	7	4	1	0	3	2	0.0204551	0.534416	1.03133
NPAS2	7	4	1	0	3	0	0.0204551	0.534416	2.77259
SFRS3	7	4	0	0	4	2	0.0204551	0.534416	1.99574
TFPT	7	4	0	1	3	0	0.0204551	0.534416	2.77259
TMEM165	7	4	0	0	4	0	0.0204551	0.534416	3.737
TSC2	7	4	1	0	3	3	0.0204551	0.534416	0
YWHAH	7	4	0	0	4	0	0.0204551	0.534416	3.737
ZC3H14	7	4	0	0	4	0	0.0204551	0.534416	3.737
ZNF638	7	4	0	0	4	1	0.0204551	0.534416	3.04385
CLOCK	16	6	0	0	6	0	0.020778	0.539172	5.46286
NUDT5	16	6	0	0	6	1	0.020778	0.539172	4.76971
BSG	62	14	4	3	7	5	0.0222422	0.575217	1.60669
FLJ37453	75	16	6	6	4	1	0.0230388	0.579296	3.04385
NUAK2	27	8	1	2	5	4	0.023412	0.579296	0.894632
C16orf91	12	5	0	1	4	6	0.0248201	0.579296	-1.72586
CCR10	12	5	2	3	0	0	0.0248201	0.579296	0
FOXN2	12	5	0	0	5	1	0.0248201	0.579296	3.93848
SDCCAG1	12	5	1	0	4	1	0.0248201	0.579296	3.04385
ATXN3	22	7	3	4	0	2	0.0249564	0.579296	-1.74126
SH3BP2	76	16	4	9	3	3	0.0253041	0.579296	0
IGDCC4	57	13	1	0	12	13	0.0253376	0.579296	-0.556387
C9orf23	17	6	2	1	3	0	0.025722	0.579296	2.77259
DCTPP1	17	6	2	1	3	1	0.025722	0.579296	2.07944
FAM49B	17	6	0	0	6	4	0.025722	0.579296	1.72586
FHAD1	17	6	0	0	6	1	0.025722	0.579296	4.76971
TADA2A	17	6	1	1	4	2	0.025722	0.579296	1.99574
TOMM40L	17	6	2	1	3	1	0.025722	0.579296	2.07944
PIGV	45	11	0	0	11	3	0.0259778	0.579296	6.13571
ADAMTSL1	201	34	0	0	34	13	0.0270502	0.579296	8.18856
EPB41L3	28	8	0	1	7	2	0.0274621	0.579296	4.49707
PLA2G6	28	8	1	1	6	6	0.0274621	0.579296	0
PCDH11X	77	16	0	0	16	6	0.0277321	0.579296	6.11779
ARHGAP4	4	3	0	0	3	1	0.0277657	0.579296	2.07944
ARL4C	4	3	1	2	0	0	0.0277657	0.579296	0
CFD	4	3	0	1	2	0	0.0277657	0.579296	1.74126
DLG4	4	3	0	1	2	1	0.0277657	0.579296	1.04811
HOXA3	4	3	0	0	3	0	0.0277657	0.579296	2.77259
KDM5C	4	3	2	0	1	0	0.0277657	0.579296	0.693147
MED29	4	3	1	2	0	1	0.0277657	0.579296	-0.693147
MICALL1	4	3	0	1	2	0	0.0277657	0.579296	1.74126
MOBKL1A	4	3	0	1	2	1	0.0277657	0.579296	1.04811
MPP7	4	3	0	1	2	1	0.0277657	0.579296	1.04811
MTSS1L	4	3	0	0	3	1	0.0277657	0.579296	2.07944
NCRNA00235	4	3	2	1	0	0	0.0277657	0.579296	0
NCSTN	4	3	0	0	3	2	0.0277657	0.579296	1.03133
OAZ2	4	3	0	1	2	1	0.0277657	0.579296	1.04811
PID1	4	3	0	0	3	0	0.0277657	0.579296	2.77259
RAB11FIP3	4	3	0	0	3	0	0.0277657	0.579296	2.77259
REPIN1	4	3	2	0	1	0	0.0277657	0.579296	0.693147
SCAND1	4	3	3	0	0	0	0.0277657	0.579296	0
SEMA5B	4	3	0	0	3	0	0.0277657	0.579296	2.77259
SMO	4	3	0	1	2	1	0.0277657	0.579296	1.04811
STK25	4	3	0	0	3	1	0.0277657	0.579296	2.07944
SYNPO2	4	3	0	0	3	3	0.0277657	0.579296	0
TAS1R1	4	3	0	1	2	1	0.0277657	0.579296	1.04811
USP8	4	3	0	1	2	0	0.0277657	0.579296	1.74126
WAPAL	4	3	0	0	3	0	0.0277657	0.579296	2.77259
XYLT2	4	3	0	1	2	0	0.0277657	0.579296	1.74126
ZNF322A	4	3	0	0	3	0	0.0277657	0.579296	2.77259
ACLY	8	4	1	0	3	2	0.0282255	0.579296	1.03133
AKAP10	8	4	0	0	4	3	0.0282255	0.579296	0.96441
C6orf47	8	4	2	2	0	0	0.0282255	0.579296	0
CCDC106	8	4	0	1	3	0	0.0282255	0.579296	2.77259
DALRD3	8	4	0	0	4	2	0.0282255	0.579296	1.99574
MESDC2	8	4	1	1	2	2	0.0282255	0.579296	0
MPV17	8	4	1	1	2	2	0.0282255	0.579296	0
PDCD2L	8	4	1	1	2	1	0.0282255	0.579296	1.04811
RBM3	8	4	2	0	2	3	0.0282255	0.579296	-1.03133
SP2	8	4	0	0	4	3	0.0282255	0.579296	0.96441
TBCCD1	8	4	0	0	4	1	0.0282255	0.579296	3.04385
IER2	46	11	0	0	11	8	0.0292886	0.579296	1.94326
ARL4A	1	2	0	1	1	0	0.0296094	0.579296	0.693147
ASTE1	1	2	0	0	2	0	0.0296094	0.579296	1.74126
AURKA	1	2	0	0	2	2	0.0296094	0.579296	0
CCL28	1	2	0	0	2	0	0.0296094	0.579296	1.74126
CDK16	1	2	0	1	1	1	0.0296094	0.579296	0
CXCL12	1	2	1	1	0	0	0.0296094	0.579296	0
DUSP1	1	2	0	2	0	0	0.0296094	0.579296	0
FIBP	1	2	1	1	0	1	0.0296094	0.579296	-0.693147
GIPC2	1	2	0	0	2	0	0.0296094	0.579296	1.74126
HEXDC	1	2	0	0	2	0	0.0296094	0.579296	1.74126
HSD17B4	1	2	0	1	1	0	0.0296094	0.579296	0.693147
KCTD5	1	2	2	0	0	0	0.0296094	0.579296	0
LOC283392	1	2	0	1	1	0	0.0296094	0.579296	0.693147
LTK	1	2	0	0	2	0	0.0296094	0.579296	1.74126
MRPL37	1	2	1	0	1	0	0.0296094	0.579296	0.693147
MXD4	1	2	0	0	2	0	0.0296094	0.579296	1.74126
NAGPA	1	2	1	0	1	1	0.0296094	0.579296	0
NRTN	1	2	0	0	2	0	0.0296094	0.579296	1.74126
NUPR1	1	2	0	0	2	0	0.0296094	0.579296	1.74126
PDIA6	1	2	0	0	2	0	0.0296094	0.579296	1.74126
PIGA	1	2	0	0	2	0	0.0296094	0.579296	1.74126
SLC25A31	1	2	0	0	2	0	0.0296094	0.579296	1.74126
SNORD58B	1	2	1	1	0	0	0.0296094	0.579296	0
STUB1	1	2	1	1	0	0	0.0296094	0.579296	0
SUCLG1	1	2	0	0	2	0	0.0296094	0.579296	1.74126
SUZ12	1	2	2	0	0	0	0.0296094	0.579296	0
SYT17	1	2	1	0	1	2	0.0296094	0.579296	-1.04811
TBC1D20	1	2	1	0	1	0	0.0296094	0.579296	0.693147
TP53I13	1	2	0	0	2	2	0.0296094	0.579296	0
TRPT1	1	2	1	0	1	0	0.0296094	0.579296	0.693147
TSPAN17	1	2	1	0	1	0	0.0296094	0.579296	0.693147
ZNF26	1	2	1	0	1	0	0.0296094	0.579296	0.693147
ZNF559	1	2	0	1	1	0	0.0296094	0.579296	0.693147
ZNF767	1	2	1	0	1	0	0.0296094	0.579296	0.693147
ZNF780A	1	2	1	0	1	0	0.0296094	0.579296	0.693147
KLHL18	23	7	1	1	5	1	0.0297405	0.579296	3.93848
MYO19	23	7	0	5	2	2	0.0297405	0.579296	0
PGAP2	23	7	0	1	6	2	0.0297405	0.579296	3.7216
MC1R	18	6	3	3	0	0	0.0313889	0.597292	0
RPS19	18	6	1	0	5	1	0.0313889	0.597292	3.93848
UBE2D2	18	6	0	1	5	6	0.0313889	0.597292	-0.831229
ANKRD34A	13	5	5	0	0	0	0.0315227	0.597292	0
CTNND1	13	5	0	0	5	3	0.0315227	0.597292	1.85904
EFCAB4B	13	5	0	0	5	0	0.0315227	0.597292	4.63163
FLJ39582	13	5	1	3	1	0	0.0315227	0.597292	0.693147
PMM2	13	5	0	0	5	2	0.0315227	0.597292	2.89037
SFRS11	13	5	0	0	5	0	0.0315227	0.597292	4.63163
TSC1	13	5	0	0	5	0	0.0315227	0.597292	4.63163
ZDHHC24	13	5	0	0	5	2	0.0315227	0.597292	2.89037
COL2A1	29	8	0	0	8	2	0.0319721	0.604312	5.22378
TNS3	92	18	0	0	18	11	0.0323057	0.609114	3.59947
SET	35	9	1	1	7	7	0.0330005	0.620685	0
ODZ3	86	17	3	1	13	10	0.03415	0.640731	1.75247
C9orf3	80	16	0	0	16	8	0.036053	0.674782	4.61562
IMP3	30	8	3	5	0	0	0.0369618	0.677836	0
NME1-NME2	30	8	0	0	8	2	0.0369618	0.677836	5.22378
ANAPC5	42	10	0	0	10	3	0.0374617	0.677836	5.52277
APITD1	9	4	2	1	1	0	0.0375193	0.677836	0.693147
C18orf34	9	4	0	2	2	3	0.0375193	0.677836	-1.03133
DHX33	9	4	0	0	4	1	0.0375193	0.677836	3.04385
FKBP11	9	4	3	0	1	2	0.0375193	0.677836	-1.04811
IBTK	9	4	0	0	4	0	0.0375193	0.677836	3.737
POR	9	4	0	1	3	0	0.0375193	0.677836	2.77259
RETSAT	9	4	0	0	4	1	0.0375193	0.677836	3.04385
C5orf24	19	6	1	1	4	1	0.0378101	0.677836	3.04385
CADPS2	19	6	0	0	6	2	0.0378101	0.677836	3.7216
FADS2	19	6	0	2	4	4	0.0378101	0.677836	0
FOXK2	19	6	1	0	5	1	0.0378101	0.677836	3.93848
HAGHL	19	6	3	2	1	1	0.0378101	0.677836	0
HOXA11AS	19	6	2	2	2	1	0.0378101	0.677836	1.04811
MRRF	19	6	0	0	6	2	0.0378101	0.677836	3.7216
SLC43A1	19	6	0	2	4	1	0.0378101	0.677836	3.04385
XPO6	129	23	0	0	23	13	0.0390962	0.687602	4.52343
C3orf23	14	5	0	3	2	0	0.039253	0.687602	1.74126
C7orf68	14	5	1	0	4	5	0.039253	0.687602	-0.894632
C8orf51	14	5	4	1	0	0	0.039253	0.687602	0
C9orf69	14	5	0	1	4	2	0.039253	0.687602	1.99574
CACNA2D2	14	5	0	0	5	2	0.039253	0.687602	2.89037
KIAA1908	14	5	3	0	2	1	0.039253	0.687602	1.04811
KLRAQ1	14	5	0	0	5	2	0.039253	0.687602	2.89037
MDH2	14	5	1	0	4	2	0.039253	0.687602	1.99574
SERPINF1	14	5	0	0	5	1	0.039253	0.687602	3.93848
LITAF	25	7	1	1	5	3	0.0410718	0.688002	1.85904
MIP	25	7	4	3	0	0	0.0410718	0.688002	0
PRMT7	25	7	0	0	7	5	0.0410718	0.688002	1.60669
SNTB1	25	7	0	1	6	2	0.0410718	0.688002	3.7216
CTH	5	3	0	0	3	1	0.0410734	0.688002	2.07944
DIMT1L	5	3	1	0	2	0	0.0410734	0.688002	1.74126
FLJ10038	5	3	1	2	0	0	0.0410734	0.688002	0
GGA3	5	3	1	0	2	0	0.0410734	0.688002	1.74126
HMCN1	5	3	0	0	3	0	0.0410734	0.688002	2.77259
IL6ST	5	3	0	0	3	1	0.0410734	0.688002	2.07944
LMF1	5	3	0	0	3	3	0.0410734	0.688002	0
MEPCE	5	3	3	0	0	0	0.0410734	0.688002	0
MSMB	5	3	1	0	2	0	0.0410734	0.688002	1.74126
PREPL	5	3	2	0	1	1	0.0410734	0.688002	0
RELA	5	3	1	1	1	0	0.0410734	0.688002	0.693147
ROCK2	5	3	0	0	3	2	0.0410734	0.688002	1.03133
TAF3	5	3	0	0	3	0	0.0410734	0.688002	2.77259
TPPP	5	3	0	0	3	0	0.0410734	0.688002	2.77259
UBTD1	5	3	2	1	0	1	0.0410734	0.688002	-0.693147
YTHDC1	5	3	0	0	3	0	0.0410734	0.688002	2.77259
DCUN1D3	31	8	0	0	8	4	0.0424484	0.709481	3.22804
ATN1	37	9	0	2	7	2	0.0426354	0.711055	4.49707
STRN3	20	6	1	0	5	1	0.0450102	0.745514	3.93848
SLMO1	83	16	0	1	15	5	0.0460505	0.745514	6.45872
TFAP2C	44	10	0	2	8	8	0.0470382	0.745514	0
AHCY	26	7	0	0	7	8	0.0476597	0.745514	-0.726712
PAN2	26	7	1	2	4	1	0.0476597	0.745514	3.04385
C19orf23	15	5	3	2	0	1	0.0480367	0.745514	-0.693147
CPNE1	15	5	0	0	5	2	0.0480367	0.745514	2.89037
RBM12	15	5	0	0	5	2	0.0480367	0.745514	2.89037
ABCA2	10	4	0	0	4	0	0.0483574	0.745514	3.737
ABHD14B	10	4	2	1	1	1	0.0483574	0.745514	0
ANKH	10	4	1	1	2	2	0.0483574	0.745514	0
BCYRN1	10	4	0	0	4	1	0.0483574	0.745514	3.04385
CBL	10	4	0	0	4	1	0.0483574	0.745514	3.04385
CLU	10	4	0	0	4	1	0.0483574	0.745514	3.04385
CPNE7	10	4	1	0	3	4	0.0483574	0.745514	-0.96441
CSNK1G2	10	4	0	0	4	2	0.0483574	0.745514	1.99574
FOXK1	10	4	1	0	3	1	0.0483574	0.745514	2.07944
GNA13	10	4	0	0	4	1	0.0483574	0.745514	3.04385
HBXIP	10	4	0	0	4	1	0.0483574	0.745514	3.04385
KIAA0652	10	4	1	0	3	1	0.0483574	0.745514	2.07944
KLHL17	10	4	2	2	0	1	0.0483574	0.745514	-0.693147
LAMC2	10	4	0	0	4	0	0.0483574	0.745514	3.737
LOC401093	10	4	3	1	0	0	0.0483574	0.745514	0
MGST2	10	4	1	0	3	3	0.0483574	0.745514	0
PDZD4	10	4	0	0	4	0	0.0483574	0.745514	3.737
TIMM13	10	4	2	2	0	0	0.0483574	0.745514	0
TNFSF12-TNFSF13	10	4	1	3	0	1	0.0483574	0.745514	-0.693147
TRIM8	10	4	2	2	0	2	0.0483574	0.745514	-1.74126
TSPAN4	10	4	0	0	4	3	0.0483574	0.745514	0.96441
VPS8	10	4	0	0	4	1	0.0483574	0.745514	3.04385
ZNF747	10	4	2	1	1	3	0.0483574	0.745514	-2.07944
LOC100216545	32	8	4	4	0	0	0.0484468	0.745514	0
TIA1	51	11	0	1	10	7	0.0504205	0.745514	2.05703
HP1BP3	58	12	0	0	12	5	0.0529871	0.745514	4.85981
ASTN2	39	9	1	0	8	4	0.0539957	0.745514	3.22804
CTBP2	27	7	1	0	6	3	0.0548825	0.745514	2.69027
AMZ2P1	2	2	1	1	0	0	0.0551919	0.745514	0
ANAPC11	2	2	0	0	2	0	0.0551919	0.745514	1.74126
ARFGAP1	2	2	0	0	2	0	0.0551919	0.745514	1.74126
C10orf125	2	2	0	1	1	0	0.0551919	0.745514	0.693147
C17orf80	2	2	0	1	1	0	0.0551919	0.745514	0.693147
C1orf123	2	2	0	0	2	3	0.0551919	0.745514	-1.03133
C2orf47	2	2	1	0	1	1	0.0551919	0.745514	0
C6orf150	2	2	0	1	1	0	0.0551919	0.745514	0.693147
CEBPA	2	2	1	1	0	0	0.0551919	0.745514	0
CHKA	2	2	0	0	2	0	0.0551919	0.745514	1.74126
CYB561	2	2	0	0	2	1	0.0551919	0.745514	1.04811
DSTYK	2	2	0	0	2	0	0.0551919	0.745514	1.74126
EFNB3	2	2	0	2	0	1	0.0551919	0.745514	-0.693147
EIF6	2	2	1	0	1	1	0.0551919	0.745514	0
ERH	2	2	0	0	2	2	0.0551919	0.745514	0
FASTKD5	2	2	0	0	2	0	0.0551919	0.745514	1.74126
FGFR3	2	2	1	0	1	0	0.0551919	0.745514	0.693147
FOXD3	2	2	1	1	0	0	0.0551919	0.745514	0
HCFC2	2	2	1	0	1	0	0.0551919	0.745514	0.693147
HOXA9	2	2	1	0	1	0	0.0551919	0.745514	0.693147
KAT5	2	2	1	1	0	0	0.0551919	0.745514	0
KBTBD8	2	2	0	0	2	0	0.0551919	0.745514	1.74126
LHX4	2	2	1	0	1	0	0.0551919	0.745514	0.693147
LOC81691	2	2	0	0	2	2	0.0551919	0.745514	0
LOC93622	2	2	0	1	1	0	0.0551919	0.745514	0.693147
LOX	2	2	1	0	1	0	0.0551919	0.745514	0.693147
LRRC23	2	2	2	0	0	1	0.0551919	0.745514	-0.693147
MDFIC	2	2	1	1	0	0	0.0551919	0.745514	0
MGAT2	2	2	1	1	0	0	0.0551919	0.745514	0
MTP18	2	2	0	0	2	0	0.0551919	0.745514	1.74126
NRBP2	2	2	0	1	1	0	0.0551919	0.745514	0.693147
OPRM1	2	2	0	0	2	0	0.0551919	0.745514	1.74126
PEX7	2	2	0	0	2	0	0.0551919	0.745514	1.74126
PHF20L1	2	2	0	0	2	0	0.0551919	0.745514	1.74126
PKN1	2	2	0	0	2	1	0.0551919	0.745514	1.04811
PMAIP1	2	2	0	0	2	0	0.0551919	0.745514	1.74126
PPP1CA	2	2	0	2	0	1	0.0551919	0.745514	-0.693147
PSORS1C2	2	2	1	0	1	0	0.0551919	0.745514	0.693147
RBM17	2	2	0	2	0	1	0.0551919	0.745514	-0.693147
RG9MTD3	2	2	1	0	1	0	0.0551919	0.745514	0.693147
RHBDF1	2	2	0	0	2	1	0.0551919	0.745514	1.04811
RPUSD1	2	2	0	0	2	0	0.0551919	0.745514	1.74126
SATL1	2	2	0	1	1	0	0.0551919	0.745514	0.693147
SERPINB1	2	2	0	0	2	1	0.0551919	0.745514	1.04811
SIP1	2	2	0	0	2	0	0.0551919	0.745514	1.74126
SLC26A6	2	2	0	0	2	0	0.0551919	0.745514	1.74126
SLC48A1	2	2	1	0	1	0	0.0551919	0.745514	0.693147
SNAPC3	2	2	0	0	2	1	0.0551919	0.745514	1.04811
SNORD49B	2	2	0	2	0	0	0.0551919	0.745514	0
STRA13	2	2	0	0	2	1	0.0551919	0.745514	1.04811
TMEM65	2	2	0	0	2	0	0.0551919	0.745514	1.74126
TRNP1	2	2	0	0	2	0	0.0551919	0.745514	1.74126
TTLL6	2	2	0	1	1	0	0.0551919	0.745514	0.693147
UBOX5	2	2	0	0	2	0	0.0551919	0.745514	1.74126
UCKL1	2	2	0	0	2	1	0.0551919	0.745514	1.04811
VWA3A	2	2	0	1	1	0	0.0551919	0.745514	0.693147
ZC3HAV1L	2	2	1	0	1	2	0.0551919	0.745514	-1.04811
ZNF10	2	2	0	0	2	0	0.0551919	0.745514	1.74126
ZNF643	2	2	0	1	1	0	0.0551919	0.745514	0.693147
ZNF684	2	2	0	0	2	0	0.0551919	0.745514	1.74126
ZNF84	2	2	0	0	2	0	0.0551919	0.745514	1.74126
ZXDB	2	2	0	2	0	0	0.0551919	0.745514	0
C13orf38	6	3	0	0	3	1	0.0569904	0.745514	2.07944
C17orf53	6	3	0	0	3	1	0.0569904	0.745514	2.07944
C4orf38	6	3	1	2	0	0	0.0569904	0.745514	0
C6orf141	6	3	1	2	0	0	0.0569904	0.745514	0
CCDC40	6	3	1	0	2	0	0.0569904	0.745514	1.74126
CCDC86	6	3	1	1	1	0	0.0569904	0.745514	0.693147
CEBPG	6	3	0	0	3	0	0.0569904	0.745514	2.77259
CTSZ	6	3	0	0	3	3	0.0569904	0.745514	0
CYTH3	6	3	0	0	3	1	0.0569904	0.745514	2.07944
DDX39	6	3	0	0	3	2	0.0569904	0.745514	1.03133
DIS3L2	6	3	0	0	3	0	0.0569904	0.745514	2.77259
DNM1P35	6	3	1	2	0	0	0.0569904	0.745514	0
FAM101A	6	3	0	0	3	1	0.0569904	0.745514	2.07944
FAM105B	6	3	0	0	3	0	0.0569904	0.745514	2.77259
FCHO1	6	3	0	0	3	2	0.0569904	0.745514	1.03133
FKBPL	6	3	1	2	0	1	0.0569904	0.745514	-0.693147
GBE1	6	3	0	1	2	2	0.0569904	0.745514	0
LRCH3	6	3	0	1	2	0	0.0569904	0.745514	1.74126
MFI2	6	3	1	0	2	1	0.0569904	0.745514	1.04811
MYST3	6	3	0	0	3	0	0.0569904	0.745514	2.77259
PARL	6	3	0	0	3	2	0.0569904	0.745514	1.03133
PPP1R13B	6	3	0	0	3	0	0.0569904	0.745514	2.77259
RGAG1	6	3	0	0	3	0	0.0569904	0.745514	2.77259
SFRS5	6	3	1	0	2	0	0.0569904	0.745514	1.74126
TJAP1	6	3	0	0	3	1	0.0569904	0.745514	2.07944
XPA	6	3	0	0	3	1	0.0569904	0.745514	2.07944
ZCCHC14	6	3	0	0	3	0	0.0569904	0.745514	2.77259
ARHGDIA	16	5	1	1	3	1	0.0578859	0.745514	2.07944
C17orf75	16	5	0	0	5	0	0.0578859	0.745514	4.63163
DNAL1	16	5	0	0	5	4	0.0578859	0.745514	0.894632
DPH1	16	5	1	2	2	1	0.0578859	0.745514	1.04811
HECTD1	16	5	1	0	4	1	0.0578859	0.745514	3.04385
HNRNPC	16	5	0	0	5	2	0.0578859	0.745514	2.89037
ICA1L	16	5	1	0	4	2	0.0578859	0.745514	1.99574
KIAA0586	16	5	1	0	4	0	0.0578859	0.745514	3.737
SLC41A3	16	5	0	0	5	2	0.0578859	0.745514	2.89037
SULT2B1	16	5	0	0	5	2	0.0578859	0.745514	2.89037
LOC645323	114	20	1	0	19	5	0.0579564	0.745514	8.31571
ACSF2	11	4	0	0	4	1	0.0607312	0.745514	3.04385
DYNC1LI1	11	4	0	0	4	1	0.0607312	0.745514	3.04385
FSCN1	11	4	0	0	4	5	0.0607312	0.745514	-0.894632
GPR173	11	4	0	0	4	1	0.0607312	0.745514	3.04385
KHDRBS1	11	4	1	1	2	0	0.0607312	0.745514	1.74126
KIAA0430	11	4	0	0	4	2	0.0607312	0.745514	1.99574
LOC113230	11	4	2	1	1	1	0.0607312	0.745514	0
NEURL4	11	4	3	0	1	0	0.0607312	0.745514	0.693147
SORT1	11	4	1	0	3	0	0.0607312	0.745514	2.77259
VWA3B	73	14	0	0	14	4	0.0609858	0.745514	6.84306
ADAM9	22	6	1	1	4	0	0.0618105	0.745514	3.737
IFT88	22	6	1	1	4	0	0.0618105	0.745514	3.737
NME1	22	6	2	0	4	2	0.0618105	0.745514	1.99574
PIR	22	6	0	0	6	0	0.0618105	0.745514	5.46286
PTPN4	47	10	1	0	9	4	0.0642716	0.745514	3.91202
BMP7	81	15	0	1	14	10	0.0665391	0.745514	2.2847
GUCA1A	54	11	1	4	6	3	0.0670886	0.745514	2.69027
C4orf34	41	9	0	0	9	4	0.0671586	0.745514	3.91202
C3orf63	17	5	0	1	4	2	0.0688	0.745514	1.99574
CCDC111	17	5	1	0	4	0	0.0688	0.745514	3.737
LYPLAL1	17	5	0	0	5	1	0.0688	0.745514	3.93848
SMYD4	17	5	0	0	5	4	0.0688	0.745514	0.894632
C11orf48	35	8	1	0	7	9	0.0696188	0.745514	-1.4107
LOXL3	35	8	1	2	5	1	0.0696188	0.745514	3.93848
PRICKLE1	35	8	0	0	8	0	0.0696188	0.745514	6.96504
SLCO5A1	35	8	0	1	7	2	0.0696188	0.745514	4.49707
DSCR3	68	13	1	0	12	11	0.0703649	0.745514	0.583143
GPHN	75	14	0	3	11	6	0.0711572	0.745514	3.44544
ANP32B	29	7	0	0	7	7	0.071268	0.745514	0
GPR125	29	7	0	0	7	3	0.071268	0.745514	3.46574
PATZ1	29	7	4	2	1	3	0.071268	0.745514	-2.07944
ARIH2	23	6	1	0	5	1	0.0714246	0.745514	3.93848
COG8	23	6	1	2	3	1	0.0714246	0.745514	2.07944
GPATCH1	23	6	0	2	4	3	0.0714246	0.745514	0.96441
PLEKHG4	23	6	2	4	0	0	0.0714246	0.745514	0
YPEL3	23	6	2	2	2	1	0.0714246	0.745514	1.04811
UST	55	11	0	0	11	9	0.0733488	0.745514	1.25928
CRLF1	12	4	0	2	2	0	0.0746062	0.745514	1.74126
CTDSP1	12	4	3	1	0	1	0.0746062	0.745514	-0.693147
DNAH3	12	4	0	0	4	3	0.0746062	0.745514	0.96441
GFER	12	4	0	0	4	2	0.0746062	0.745514	1.99574
GNAZ	12	4	0	0	4	2	0.0746062	0.745514	1.99574
GPCPD1	12	4	0	1	3	0	0.0746062	0.745514	2.77259
ITPKC	12	4	2	0	2	3	0.0746062	0.745514	-1.03133
LOXL1	12	4	1	0	3	0	0.0746062	0.745514	2.77259
MBLAC1	12	4	3	1	0	0	0.0746062	0.745514	0
NOG	12	4	2	2	0	0	0.0746062	0.745514	0
PCDH15	12	4	0	0	4	2	0.0746062	0.745514	1.99574
RXRB	12	4	2	0	2	0	0.0746062	0.745514	1.74126
SEP15	12	4	0	0	4	2	0.0746062	0.745514	1.99574
SP4	12	4	0	1	3	2	0.0746062	0.745514	1.03133
ST7	12	4	0	1	3	0	0.0746062	0.745514	2.77259
STOML2	12	4	0	2	2	1	0.0746062	0.745514	1.04811
ADAT1	7	3	0	0	3	0	0.0753483	0.745514	2.77259
AFMID	7	3	0	0	3	3	0.0753483	0.745514	0
ANKRD39	7	3	0	0	3	3	0.0753483	0.745514	0
BCMO1	7	3	1	0	2	0	0.0753483	0.745514	1.74126
C1orf84	7	3	0	0	3	1	0.0753483	0.745514	2.07944
C5orf56	7	3	0	1	2	3	0.0753483	0.745514	-1.03133
COMTD1	7	3	2	1	0	0	0.0753483	0.745514	0
CSNK1D	7	3	1	0	2	4	0.0753483	0.745514	-1.99574
CSNK2A1	7	3	0	0	3	4	0.0753483	0.745514	-0.96441
ESR2	7	3	0	0	3	0	0.0753483	0.745514	2.77259
FAM168B	7	3	0	0	3	2	0.0753483	0.745514	1.03133
FBXW2	7	3	0	1	2	0	0.0753483	0.745514	1.74126
GLTSCR1	7	3	0	0	3	3	0.0753483	0.745514	0
HCG11	7	3	2	1	0	0	0.0753483	0.745514	0
HSPA4	7	3	1	1	1	0	0.0753483	0.745514	0.693147
HSPC157	7	3	2	1	0	0	0.0753483	0.745514	0
INPPL1	7	3	0	0	3	2	0.0753483	0.745514	1.03133
LMNB2	7	3	1	0	2	0	0.0753483	0.745514	1.74126
LY75	7	3	0	0	3	1	0.0753483	0.745514	2.07944
PARP3	7	3	1	1	1	0	0.0753483	0.745514	0.693147
PNPLA6	7	3	0	0	3	0	0.0753483	0.745514	2.77259
QRICH1	7	3	1	0	2	1	0.0753483	0.745514	1.04811
RAB13	7	3	0	0	3	2	0.0753483	0.745514	1.03133
RBPMS2	7	3	0	2	1	1	0.0753483	0.745514	0
SCN8A	7	3	0	0	3	1	0.0753483	0.745514	2.07944
SMARCAD1	7	3	0	1	2	2	0.0753483	0.745514	0
SSH1	7	3	0	1	2	0	0.0753483	0.745514	1.74126
STARD7	7	3	2	0	1	2	0.0753483	0.745514	-1.04811
TMEM129	7	3	0	2	1	0	0.0753483	0.745514	0.693147
TMEM216	7	3	0	2	1	1	0.0753483	0.745514	0
UBE2O	7	3	0	0	3	1	0.0753483	0.745514	2.07944
VSIG10	7	3	0	0	3	3	0.0753483	0.745514	0
ZNF846	7	3	0	0	3	0	0.0753483	0.745514	2.77259
CENPV	36	8	2	0	6	7	0.0777562	0.745514	-0.775464
DEPDC6	36	8	0	0	8	3	0.0777562	0.745514	4.19245
ST3GAL2	36	8	2	3	3	2	0.0777562	0.745514	1.03133
PPHLN1	30	7	1	0	6	2	0.080437	0.745514	3.7216
COLEC11	18	5	1	0	4	6	0.0807661	0.745514	-1.72586
ITGB1	18	5	0	0	5	1	0.0807661	0.745514	3.93848
MRPL23	18	5	0	0	5	2	0.0807661	0.745514	2.89037
MYLPF	18	5	0	2	3	2	0.0807661	0.745514	1.03133
POMGNT1	18	5	0	1	4	0	0.0807661	0.745514	3.737
PSMA4	18	5	0	0	5	2	0.0807661	0.745514	2.89037
RAB26	18	5	0	2	3	1	0.0807661	0.745514	2.07944
ABCC4	24	6	1	0	5	0	0.0818457	0.745514	4.63163
CYB5D2	24	6	1	3	2	2	0.0818457	0.745514	0
FADS1	24	6	0	0	6	4	0.0818457	0.745514	1.72586
INTS6	24	6	0	2	4	2	0.0818457	0.745514	1.99574
MTF2	24	6	0	0	6	4	0.0818457	0.745514	1.72586
MYH10	24	6	0	0	6	6	0.0818457	0.745514	0
SMARCC1	50	10	0	0	10	4	0.0850991	0.745514	4.55836
AATK	3	2	1	0	1	1	0.0857905	0.745514	0
ASB1	3	2	0	0	2	0	0.0857905	0.745514	1.74126
ATHL1	3	2	0	0	2	0	0.0857905	0.745514	1.74126
B4GALNT3	3	2	0	0	2	0	0.0857905	0.745514	1.74126
C11orf52	3	2	0	2	0	0	0.0857905	0.745514	0
C11orf70	3	2	0	0	2	0	0.0857905	0.745514	1.74126
C19orf61	3	2	0	1	1	0	0.0857905	0.745514	0.693147
C1orf58	3	2	0	0	2	0	0.0857905	0.745514	1.74126
CATSPER1	3	2	0	0	2	1	0.0857905	0.745514	1.04811
CCNE2	3	2	0	0	2	0	0.0857905	0.745514	1.74126
DBNDD1	3	2	0	0	2	0	0.0857905	0.745514	1.74126
DHX57	3	2	0	1	1	0	0.0857905	0.745514	0.693147
DLX4	3	2	0	1	1	0	0.0857905	0.745514	0.693147
DMWD	3	2	0	0	2	0	0.0857905	0.745514	1.74126
DOLK	3	2	1	1	0	0	0.0857905	0.745514	0
GLRX2	3	2	1	1	0	0	0.0857905	0.745514	0
HES2	3	2	1	1	0	0	0.0857905	0.745514	0
HIVEP3	3	2	1	0	1	0	0.0857905	0.745514	0.693147
HOXA1	3	2	0	2	0	0	0.0857905	0.745514	0
HTR7P1	3	2	1	1	0	0	0.0857905	0.745514	0
ICAM1	3	2	0	1	1	0	0.0857905	0.745514	0.693147
IER3	3	2	2	0	0	0	0.0857905	0.745514	0
INF2	3	2	0	0	2	0	0.0857905	0.745514	1.74126
KIAA0494	3	2	1	1	0	0	0.0857905	0.745514	0
KIAA0556	3	2	0	0	2	3	0.0857905	0.745514	-1.03133
KIF3C	3	2	1	0	1	0	0.0857905	0.745514	0.693147
KLHL9	3	2	1	1	0	0	0.0857905	0.745514	0
MPZL1	3	2	0	0	2	2	0.0857905	0.745514	0
MTAP	3	2	0	1	1	1	0.0857905	0.745514	0
NHLRC4	3	2	2	0	0	0	0.0857905	0.745514	0
NKRF	3	2	0	0	2	0	0.0857905	0.745514	1.74126
NRL	3	2	1	1	0	0	0.0857905	0.745514	0
NTHL1	3	2	0	0	2	3	0.0857905	0.745514	-1.03133
PARP10	3	2	0	1	1	0	0.0857905	0.745514	0.693147
PLA2G4C	3	2	1	0	1	0	0.0857905	0.745514	0.693147
PLD3	3	2	0	0	2	0	0.0857905	0.745514	1.74126
PLS1	3	2	0	0	2	0	0.0857905	0.745514	1.74126
PRIMA1	3	2	0	0	2	1	0.0857905	0.745514	1.04811
PRPF4B	3	2	0	0	2	0	0.0857905	0.745514	1.74126
RNF141	3	2	0	0	2	0	0.0857905	0.745514	1.74126
RNF5	3	2	1	0	1	0	0.0857905	0.745514	0.693147
RNF5P1	3	2	1	0	1	0	0.0857905	0.745514	0.693147
SC5DL	3	2	0	0	2	1	0.0857905	0.745514	1.04811
SIRT3	3	2	0	0	2	0	0.0857905	0.745514	1.74126
SLC12A9	3	2	1	0	1	1	0.0857905	0.745514	0
SLCO4A1	3	2	0	0	2	1	0.0857905	0.745514	1.04811
SOX4	3	2	1	1	0	0	0.0857905	0.745514	0
SSR4	3	2	0	0	2	1	0.0857905	0.745514	1.04811
TOP2B	3	2	2	0	0	0	0.0857905	0.745514	0
TRMT5	3	2	0	0	2	2	0.0857905	0.745514	0
TRPC6	3	2	0	0	2	0	0.0857905	0.745514	1.74126
TSHR	3	2	0	0	2	0	0.0857905	0.745514	1.74126
TSSK6	3	2	2	0	0	0	0.0857905	0.745514	0
UBE2J2	3	2	0	0	2	0	0.0857905	0.745514	1.74126
UCKL1AS	3	2	0	2	0	0	0.0857905	0.745514	0
UGT8	3	2	0	0	2	0	0.0857905	0.745514	1.74126
VPS4A	3	2	1	0	1	0	0.0857905	0.745514	0.693147
WDR24	3	2	0	1	1	0	0.0857905	0.745514	0.693147
ZC3H3	3	2	0	0	2	0	0.0857905	0.745514	1.74126
ZFPM2	3	2	0	0	2	1	0.0857905	0.745514	1.04811
ZNF250	3	2	1	0	1	1	0.0857905	0.745514	0
ZNF543	3	2	0	0	2	0	0.0857905	0.745514	1.74126
ZNF704	3	2	0	0	2	0	0.0857905	0.745514	1.74126
ZNF768	3	2	1	1	0	0	0.0857905	0.745514	0
PHLDB2	37	8	0	1	7	2	0.0864368	0.745514	4.49707
SOHLH2	37	8	1	0	7	5	0.0864368	0.745514	1.60669
ARID1B	64	12	4	2	6	2	0.0879872	0.745514	3.7216
PIAS2	71	13	0	1	12	2	0.0884217	0.745514	7.75018
ACSS3	13	4	0	0	4	3	0.089925	0.745514	0.96441
AKAP8L	13	4	0	1	3	0	0.089925	0.745514	2.77259
C1orf156	13	4	1	0	3	1	0.089925	0.745514	2.07944
C1orf216	13	4	0	3	1	1	0.089925	0.745514	0
CNNM4	13	4	0	1	3	2	0.089925	0.745514	1.03133
CRKL	13	4	2	0	2	2	0.089925	0.745514	0
GABPB2	13	4	1	0	3	2	0.089925	0.745514	1.03133
MOB2	13	4	0	0	4	1	0.089925	0.745514	3.04385
OVCA2	13	4	1	2	1	0	0.089925	0.745514	0.693147
P4HA1	13	4	0	0	4	2	0.089925	0.745514	1.99574
RPP25	13	4	1	3	0	0	0.089925	0.745514	0
SIX5	13	4	1	3	0	0	0.089925	0.745514	0
SLC19A1	13	4	0	0	4	1	0.089925	0.745514	3.04385
TLX1	13	4	0	0	4	2	0.089925	0.745514	1.99574
C6orf89	31	7	0	0	7	0	0.090254	0.745514	6.23832
TMEM26	44	9	1	3	5	6	0.0903726	0.745514	-0.831229
KDM2B	144	23	4	3	16	20	0.0919533	0.745514	-1.79185
AGPAT3	25	6	0	0	6	4	0.0930635	0.745514	1.72586
CDKN2BAS	25	6	0	0	6	5	0.0930635	0.745514	0.831229
MAGIX	25	6	3	2	1	0	0.0930635	0.745514	0.693147
MKNK2	25	6	1	1	4	3	0.0930635	0.745514	0.96441
SLC1A5	25	6	3	2	1	3	0.0930635	0.745514	-2.07944
C1QBP	19	5	0	0	5	1	0.0937601	0.745514	3.93848
CACNA1C	19	5	2	3	0	0	0.0937601	0.745514	0
LAMC1	19	5	0	0	5	2	0.0937601	0.745514	2.89037
SFXN2	19	5	0	1	4	3	0.0937601	0.745514	0.96441
ZC3H10	19	5	0	1	4	1	0.0937601	0.745514	3.04385
ITFG1	58	11	0	1	10	3	0.0942851	0.745514	5.52277
ABCB5	8	3	0	0	3	0	0.0959332	0.745514	2.77259
ANKHD1	8	3	0	0	3	0	0.0959332	0.745514	2.77259
ANKHD1-EIF4EBP3	8	3	0	0	3	0	0.0959332	0.745514	2.77259
BLOC1S1	8	3	0	2	1	3	0.0959332	0.745514	-2.07944
CHD1	8	3	0	0	3	2	0.0959332	0.745514	1.03133
DZIP3	8	3	0	0	3	2	0.0959332	0.745514	1.03133
EFHA2	8	3	0	0	3	0	0.0959332	0.745514	2.77259
FBRSL1	8	3	0	0	3	0	0.0959332	0.745514	2.77259
FRMD4A	8	3	0	0	3	3	0.0959332	0.745514	0
FUT11	8	3	0	3	0	1	0.0959332	0.745514	-0.693147
HMGB1	8	3	0	0	3	0	0.0959332	0.745514	2.77259
IFFO1	8	3	0	0	3	0	0.0959332	0.745514	2.77259
INO80D	8	3	0	0	3	1	0.0959332	0.745514	2.07944
MAGEF1	8	3	1	2	0	0	0.0959332	0.745514	0
MPPE1	8	3	0	0	3	1	0.0959332	0.745514	2.07944
NEDD4	8	3	0	0	3	0	0.0959332	0.745514	2.77259
NOS2	8	3	0	0	3	0	0.0959332	0.745514	2.77259
NR2F6	8	3	0	1	2	3	0.0959332	0.745514	-1.03133
OSM	8	3	1	2	0	0	0.0959332	0.745514	0
PFDN1	8	3	0	0	3	1	0.0959332	0.745514	2.07944
PGRMC2	8	3	1	1	1	0	0.0959332	0.745514	0.693147
PHTF2	8	3	1	0	2	2	0.0959332	0.745514	0
PRDX2	8	3	0	0	3	0	0.0959332	0.745514	2.77259
RNF7	8	3	0	1	2	0	0.0959332	0.745514	1.74126
SHISA3	8	3	0	3	0	2	0.0959332	0.745514	-1.74126
SLC27A5	8	3	2	1	0	3	0.0959332	0.745514	-2.77259
ST8SIA2	8	3	0	0	3	0	0.0959332	0.745514	2.77259
TMEM149	8	3	1	0	2	2	0.0959332	0.745514	0
TNRC6A	8	3	0	1	2	1	0.0959332	0.745514	1.04811
UTP18	8	3	0	0	3	1	0.0959332	0.745514	2.07944
ZNF346	8	3	1	1	1	3	0.0959332	0.745514	-2.07944
ZNF445	8	3	0	0	3	0	0.0959332	0.745514	2.77259
BBS4	32	7	0	0	7	6	0.100711	0.745514	0.775464
YARS	32	7	1	1	5	4	0.100711	0.745514	0.894632
C11orf41	52	10	5	5	0	1	0.101014	0.745514	-0.693147
SLC3A2	80	14	1	3	10	8	0.101223	0.745514	1.33032
XIAP	59	11	0	0	11	2	0.101985	0.745514	7.16704
A2ML1	0	1	0	0	1	0	0.10294	0.745514	0.693147
ABCB4	0	1	0	0	1	0	0.10294	0.745514	0.693147
ABO	0	1	0	0	1	0	0.10294	0.745514	0.693147
ACAA1	0	1	0	0	1	0	0.10294	0.745514	0.693147
ADAD2	0	1	0	0	1	0	0.10294	0.745514	0.693147
AGXT2	0	1	0	0	1	0	0.10294	0.745514	0.693147
ALDH3B2	0	1	0	0	1	0	0.10294	0.745514	0.693147
ALDOC	0	1	0	0	1	0	0.10294	0.745514	0.693147
AMIGO3	0	1	1	0	0	0	0.10294	0.745514	0
APOA5	0	1	0	1	0	0	0.10294	0.745514	0
APOBEC3F	0	1	0	0	1	0	0.10294	0.745514	0.693147
APOC4	0	1	0	0	1	0	0.10294	0.745514	0.693147
ARHGAP33	0	1	0	0	1	0	0.10294	0.745514	0.693147
ARMCX4	0	1	0	0	1	0	0.10294	0.745514	0.693147
ASB18	0	1	0	0	1	0	0.10294	0.745514	0.693147
BAHD1	0	1	0	0	1	0	0.10294	0.745514	0.693147
BCAR4	0	1	0	0	1	0	0.10294	0.745514	0.693147
BLNK	0	1	0	0	1	0	0.10294	0.745514	0.693147
BMP5	0	1	0	0	1	0	0.10294	0.745514	0.693147
BTG1	0	1	1	0	0	0	0.10294	0.745514	0
BZRAP1	0	1	0	0	1	0	0.10294	0.745514	0.693147
C14orf79	0	1	1	0	0	0	0.10294	0.745514	0
C15orf55	0	1	0	0	1	0	0.10294	0.745514	0.693147
C17orf105	0	1	0	1	0	0	0.10294	0.745514	0
C17orf69	0	1	1	0	0	0	0.10294	0.745514	0
C1orf204	0	1	1	0	0	0	0.10294	0.745514	0
C1orf220	0	1	0	0	1	0	0.10294	0.745514	0.693147
C21orf125	0	1	0	1	0	0	0.10294	0.745514	0
C22orf9	0	1	0	0	1	0	0.10294	0.745514	0.693147
C2orf29	0	1	0	0	1	1	0.10294	0.745514	0
C6orf127	0	1	0	0	1	0	0.10294	0.745514	0.693147
C7orf51	0	1	0	0	1	0	0.10294	0.745514	0.693147
C7orf57	0	1	0	0	1	0	0.10294	0.745514	0.693147
C9orf119	0	1	0	0	1	0	0.10294	0.745514	0.693147
C9orf4	0	1	0	0	1	0	0.10294	0.745514	0.693147
C9orf84	0	1	0	0	1	0	0.10294	0.745514	0.693147
CAPN13	0	1	0	0	1	0	0.10294	0.745514	0.693147
CCDC64B	0	1	1	0	0	0	0.10294	0.745514	0
CCL25	0	1	0	0	1	0	0.10294	0.745514	0.693147
CDH20	0	1	0	0	1	0	0.10294	0.745514	0.693147
CEMP1	0	1	0	1	0	0	0.10294	0.745514	0
CEND1	0	1	0	0	1	0	0.10294	0.745514	0.693147
CHIA	0	1	0	0	1	0	0.10294	0.745514	0.693147
CHPF2	0	1	0	1	0	0	0.10294	0.745514	0
CIB3	0	1	0	1	0	0	0.10294	0.745514	0
CLEC4E	0	1	0	1	0	0	0.10294	0.745514	0
CMTM2	0	1	0	0	1	0	0.10294	0.745514	0.693147
CMTM6	0	1	0	0	1	0	0.10294	0.745514	0.693147
CNRIP1	0	1	0	0	1	1	0.10294	0.745514	0
CNTN2	0	1	0	0	1	0	0.10294	0.745514	0.693147
CORO6	0	1	0	0	1	1	0.10294	0.745514	0
CORT	0	1	1	0	0	0	0.10294	0.745514	0
CPN1	0	1	0	0	1	0	0.10294	0.745514	0.693147
CRHBP	0	1	1	0	0	0	0.10294	0.745514	0
CRYBB1	0	1	0	0	1	0	0.10294	0.745514	0.693147
CYP1A1	0	1	0	0	1	0	0.10294	0.745514	0.693147
DAPP1	0	1	0	0	1	0	0.10294	0.745514	0.693147
DENND2D	0	1	0	0	1	0	0.10294	0.745514	0.693147
DHDPSL	0	1	0	0	1	0	0.10294	0.745514	0.693147
DPPA3	0	1	0	0	1	0	0.10294	0.745514	0.693147
DRD2	0	1	0	0	1	0	0.10294	0.745514	0.693147
DSG3	0	1	1	0	0	0	0.10294	0.745514	0
DUSP5	0	1	0	1	0	0	0.10294	0.745514	0
EGFR	0	1	0	0	1	0	0.10294	0.745514	0.693147
ELF1	0	1	0	0	1	0	0.10294	0.745514	0.693147
EVPL	0	1	1	0	0	0	0.10294	0.745514	0
F3	0	1	1	0	0	0	0.10294	0.745514	0
F7	0	1	0	0	1	0	0.10294	0.745514	0.693147
FAM128B	0	1	0	0	1	0	0.10294	0.745514	0.693147
FAM131C	0	1	0	0	1	0	0.10294	0.745514	0.693147
FAM167B	0	1	0	0	1	0	0.10294	0.745514	0.693147
FAM26F	0	1	0	1	0	0	0.10294	0.745514	0
FAM71F1	0	1	0	0	1	0	0.10294	0.745514	0.693147
FGF19	0	1	0	1	0	0	0.10294	0.745514	0
FGF4	0	1	0	1	0	0	0.10294	0.745514	0
FLJ42289	0	1	1	0	0	0	0.10294	0.745514	0
FOXA3	0	1	1	0	0	0	0.10294	0.745514	0
FREM3	0	1	0	0	1	0	0.10294	0.745514	0.693147
FUT3	0	1	0	0	1	0	0.10294	0.745514	0.693147
FYB	0	1	0	0	1	2	0.10294	0.745514	-1.04811
FZD2	0	1	0	1	0	0	0.10294	0.745514	0
FZD4	0	1	1	0	0	0	0.10294	0.745514	0
GALNT9	0	1	0	1	0	0	0.10294	0.745514	0
GJA9	0	1	0	1	0	0	0.10294	0.745514	0
GJD3	0	1	1	0	0	0	0.10294	0.745514	0
GLRA2	0	1	1	0	0	0	0.10294	0.745514	0
GLT6D1	0	1	0	0	1	0	0.10294	0.745514	0.693147
GOLGA2	0	1	0	0	1	0	0.10294	0.745514	0.693147
GOLGA6L5	0	1	1	0	0	0	0.10294	0.745514	0
GPR34	0	1	0	0	1	0	0.10294	0.745514	0.693147
GPR88	0	1	1	0	0	0	0.10294	0.745514	0
GPX4	0	1	0	1	0	0	0.10294	0.745514	0
GRM3	0	1	0	0	1	0	0.10294	0.745514	0.693147
GSC2	0	1	1	0	0	0	0.10294	0.745514	0
GTSE1	0	1	0	0	1	0	0.10294	0.745514	0.693147
HAR1A	0	1	1	0	0	0	0.10294	0.745514	0
HES3	0	1	0	0	1	0	0.10294	0.745514	0.693147
HSPA5	0	1	0	1	0	0	0.10294	0.745514	0
IDI2	0	1	0	0	1	0	0.10294	0.745514	0.693147
IER5	0	1	1	0	0	0	0.10294	0.745514	0
IRAK4	0	1	0	0	1	0	0.10294	0.745514	0.693147
IRX4	0	1	1	0	0	0	0.10294	0.745514	0
ISM2	0	1	0	1	0	0	0.10294	0.745514	0
ITK	0	1	0	0	1	0	0.10294	0.745514	0.693147
JAK3	0	1	0	0	1	1	0.10294	0.745514	0
JUN	0	1	0	1	0	0	0.10294	0.745514	0
KCNH3	0	1	0	0	1	1	0.10294	0.745514	0
KCNT1	0	1	0	0	1	0	0.10294	0.745514	0.693147
KIAA0141	0	1	0	0	1	0	0.10294	0.745514	0.693147
KIAA1257	0	1	0	1	0	0	0.10294	0.745514	0
KIAA1704	0	1	1	0	0	0	0.10294	0.745514	0
KIF5A	0	1	0	0	1	0	0.10294	0.745514	0.693147
KLHDC7A	0	1	1	0	0	0	0.10294	0.745514	0
KRT78	0	1	1	0	0	0	0.10294	0.745514	0
L3MBTL4	0	1	0	0	1	0	0.10294	0.745514	0.693147
LMO1	0	1	0	0	1	0	0.10294	0.745514	0.693147
LOC100125556	0	1	0	0	1	0	0.10294	0.745514	0.693147
LOC285548	0	1	0	1	0	0	0.10294	0.745514	0
LOC285733	0	1	0	0	1	0	0.10294	0.745514	0.693147
LOC339524	0	1	0	0	1	0	0.10294	0.745514	0.693147
LOC400931	0	1	0	0	1	0	0.10294	0.745514	0.693147
LOC441869	0	1	0	0	1	0	0.10294	0.745514	0.693147
LOC729668	0	1	0	0	1	0	0.10294	0.745514	0.693147
LRRC4C	0	1	0	0	1	0	0.10294	0.745514	0.693147
LRRC66	0	1	1	0	0	0	0.10294	0.745514	0
LYL1	0	1	0	0	1	0	0.10294	0.745514	0.693147
MAP3K10	0	1	0	0	1	1	0.10294	0.745514	0
MAPKSP1	0	1	0	0	1	1	0.10294	0.745514	0
MCAT	0	1	0	1	0	0	0.10294	0.745514	0
MFAP2	0	1	0	0	1	1	0.10294	0.745514	0
MIA	0	1	1	0	0	0	0.10294	0.745514	0
MIR219-1	0	1	1	0	0	0	0.10294	0.745514	0
MIR302A	0	1	1	0	0	0	0.10294	0.745514	0
MKNK1	0	1	1	0	0	0	0.10294	0.745514	0
MPV17L	0	1	0	0	1	0	0.10294	0.745514	0.693147
MSLNL	0	1	0	0	1	0	0.10294	0.745514	0.693147
MYCN	0	1	1	0	0	0	0.10294	0.745514	0
MYCNOS	0	1	0	1	0	0	0.10294	0.745514	0
MYH6	0	1	0	0	1	0	0.10294	0.745514	0.693147
NACAD	0	1	0	0	1	0	0.10294	0.745514	0.693147
NCRNA00176	0	1	0	1	0	0	0.10294	0.745514	0
NDUFAF4	0	1	0	0	1	0	0.10294	0.745514	0.693147
NEUROD2	0	1	0	1	0	0	0.10294	0.745514	0
NOS1	0	1	0	0	1	0	0.10294	0.745514	0.693147
ORMDL3	0	1	0	0	1	0	0.10294	0.745514	0.693147
OTOP2	0	1	0	1	0	0	0.10294	0.745514	0
PACRGL	0	1	0	0	1	1	0.10294	0.745514	0
PART1	0	1	0	0	1	0	0.10294	0.745514	0.693147
PAX7	0	1	0	0	1	0	0.10294	0.745514	0.693147
PDCL2	0	1	0	0	1	0	0.10294	0.745514	0.693147
PDCL3	0	1	0	1	0	0	0.10294	0.745514	0
PDE1C	0	1	0	0	1	0	0.10294	0.745514	0.693147
PDGFA	0	1	0	0	1	0	0.10294	0.745514	0.693147
PDXDC2	0	1	0	0	1	0	0.10294	0.745514	0.693147
PITPNM1	0	1	0	0	1	0	0.10294	0.745514	0.693147
PLA2G2D	0	1	0	0	1	0	0.10294	0.745514	0.693147
PLXND1	0	1	0	1	0	0	0.10294	0.745514	0
PPP1R11	0	1	0	0	1	0	0.10294	0.745514	0.693147
PTPN5	0	1	1	0	0	0	0.10294	0.745514	0
PYGM	0	1	0	0	1	1	0.10294	0.745514	0
RDH13	0	1	0	0	1	0	0.10294	0.745514	0.693147
RFNG	0	1	0	0	1	1	0.10294	0.745514	0
RHBDD1	0	1	0	0	1	0	0.10294	0.745514	0.693147
RIC3	0	1	0	0	1	0	0.10294	0.745514	0.693147
RICH2	0	1	0	0	1	0	0.10294	0.745514	0.693147
RPS2P32	0	1	1	0	0	0	0.10294	0.745514	0
SCAND3	0	1	0	0	1	0	0.10294	0.745514	0.693147
SCARNA17	0	1	0	1	0	0	0.10294	0.745514	0
SEMA6C	0	1	0	0	1	0	0.10294	0.745514	0.693147
SEPT4	0	1	0	0	1	0	0.10294	0.745514	0.693147
SERPINE1	0	1	0	1	0	0	0.10294	0.745514	0
SFRS16	0	1	0	0	1	1	0.10294	0.745514	0
SLA	0	1	0	0	1	0	0.10294	0.745514	0.693147
SLC2A1	0	1	0	1	0	0	0.10294	0.745514	0
SLC2A12	0	1	0	0	1	0	0.10294	0.745514	0.693147
SLC30A3	0	1	0	1	0	1	0.10294	0.745514	-0.693147
SLC35C2	0	1	0	0	1	0	0.10294	0.745514	0.693147
SLC46A3	0	1	1	0	0	0	0.10294	0.745514	0
SLC7A5P2	0	1	1	0	0	0	0.10294	0.745514	0
SLC9A3R2	0	1	0	0	1	1	0.10294	0.745514	0
SMARCA5	0	1	0	0	1	0	0.10294	0.745514	0.693147
SNORD2	0	1	0	1	0	0	0.10294	0.745514	0
SNORD42B	0	1	0	1	0	0	0.10294	0.745514	0
SOCS3	0	1	0	1	0	0	0.10294	0.745514	0
SPNS1	0	1	0	1	0	0	0.10294	0.745514	0
SPTBN2	0	1	0	0	1	0	0.10294	0.745514	0.693147
STARD8	0	1	0	0	1	0	0.10294	0.745514	0.693147
SUMO3	0	1	0	1	0	0	0.10294	0.745514	0
SYF2	0	1	1	0	0	0	0.10294	0.745514	0
TBKBP1	0	1	1	0	0	0	0.10294	0.745514	0
TCAM1P	0	1	0	1	0	0	0.10294	0.745514	0
TERF2IP	0	1	0	1	0	0	0.10294	0.745514	0
THUMPD1	0	1	1	0	0	0	0.10294	0.745514	0
TLL2	0	1	0	0	1	0	0.10294	0.745514	0.693147
TMEM158	0	1	1	0	0	0	0.10294	0.745514	0
TMEM205	0	1	1	0	0	0	0.10294	0.745514	0
TMOD4	0	1	0	0	1	0	0.10294	0.745514	0.693147
TRIM34	0	1	0	0	1	0	0.10294	0.745514	0.693147
TRIM39	0	1	1	0	0	0	0.10294	0.745514	0
TRO	0	1	0	0	1	0	0.10294	0.745514	0.693147
TSN	0	1	0	0	1	0	0.10294	0.745514	0.693147
TSPYL2	0	1	1	0	0	0	0.10294	0.745514	0
TTC24	0	1	1	0	0	0	0.10294	0.745514	0
VGF	0	1	1	0	0	0	0.10294	0.745514	0
VSIG8	0	1	0	0	1	0	0.10294	0.745514	0.693147
WFS1	0	1	0	0	1	1	0.10294	0.745514	0
WNT2	0	1	0	0	1	0	0.10294	0.745514	0.693147
WSCD2	0	1	0	0	1	0	0.10294	0.745514	0.693147
YY2	0	1	1	0	0	0	0.10294	0.745514	0
ZBTB22	0	1	1	0	0	0	0.10294	0.745514	0
ZFP112	0	1	0	0	1	0	0.10294	0.745514	0.693147
ZFP28	0	1	0	0	1	0	0.10294	0.745514	0.693147
ZIC1	0	1	0	1	0	0	0.10294	0.745514	0
ZNF14	0	1	0	0	1	0	0.10294	0.745514	0.693147
ZNF226	0	1	0	0	1	0	0.10294	0.745514	0.693147
ZNF23	0	1	0	0	1	0	0.10294	0.745514	0.693147
ZNF37A	0	1	0	1	0	0	0.10294	0.745514	0
ZNF37B	0	1	0	0	1	0	0.10294	0.745514	0.693147
ZNF654	0	1	1	0	0	0	0.10294	0.745514	0
ZNF665	0	1	0	0	1	0	0.10294	0.745514	0.693147
ZNF746	0	1	0	0	1	0	0.10294	0.745514	0.693147
ZNF784	0	1	0	0	1	0	0.10294	0.745514	0.693147
ZNF831	0	1	0	0	1	0	0.10294	0.745514	0.693147
ZNF841	0	1	0	0	1	0	0.10294	0.745514	0.693147
ZNHIT1	0	1	1	0	0	0	0.10294	0.745514	0
ABCA3	26	6	0	0	6	4	0.105062	0.754261	1.72586
PABPN1	26	6	1	4	1	1	0.105062	0.754261	0
PHF12	26	6	1	4	1	3	0.105062	0.754261	-2.07944
SNX5	39	8	1	1	6	8	0.105415	0.754261	-1.50218
BCAS4	14	4	0	0	4	0	0.106611	0.754261	3.737
BDH1	14	4	2	1	1	3	0.106611	0.754261	-2.07944
C11orf59	14	4	0	0	4	1	0.106611	0.754261	3.04385
C12orf72	14	4	0	0	4	0	0.106611	0.754261	3.737
CENPBD1	14	4	3	1	0	0	0.106611	0.754261	0
CTAGE5	14	4	0	1	3	2	0.106611	0.754261	1.03133
DDN	14	4	0	2	2	0	0.106611	0.754261	1.74126
FAM120AOS	14	4	3	0	1	2	0.106611	0.754261	-1.04811
IFNGR2	14	4	2	1	1	2	0.106611	0.754261	-1.04811
IGF2BP3	14	4	0	0	4	0	0.106611	0.754261	3.737
JMY	14	4	0	2	2	4	0.106611	0.754261	-1.99574
JUB	14	4	2	1	1	2	0.106611	0.754261	-1.04811
KCNN1	14	4	0	1	3	2	0.106611	0.754261	1.03133
MAN2C1	14	4	0	1	3	0	0.106611	0.754261	2.77259
MASTL	14	4	2	2	0	1	0.106611	0.754261	-0.693147
NPVF	14	4	1	0	3	4	0.106611	0.754261	-0.96441
PNMA1	14	4	3	1	0	0	0.106611	0.754261	0
RCCD1	14	4	1	0	3	1	0.106611	0.754261	2.07944
SALL1	14	4	1	0	3	2	0.106611	0.754261	1.03133
SYN3	14	4	0	0	4	0	0.106611	0.754261	3.737
TUBD1	14	4	0	2	2	3	0.106611	0.754261	-1.03133
ATXN7L2	20	5	0	0	5	0	0.107748	0.757399	4.63163
LOC100128191	20	5	2	3	0	0	0.107748	0.757399	0
MAPK1IP1L	20	5	0	0	5	3	0.107748	0.757399	1.85904
NCRNA00167	20	5	3	2	0	0	0.107748	0.757399	0
RPN2	20	5	0	0	5	3	0.107748	0.757399	1.85904
STRADA	20	5	0	0	5	1	0.107748	0.757399	3.93848
ZDHHC14	20	5	0	1	4	3	0.107748	0.757399	0.96441
GTF2I	33	7	2	1	4	4	0.111798	0.765507	0
PACS1	33	7	2	0	5	4	0.111798	0.765507	0.894632
PDS5B	33	7	6	0	1	1	0.111798	0.765507	0
ASH2L	40	8	1	4	3	4	0.115699	0.765507	-0.96441
SNRPA	40	8	2	0	6	3	0.115699	0.765507	2.69027
LOC100131691	47	9	2	2	5	7	0.117747	0.765507	-1.60669
FAM63A	27	6	2	1	3	3	0.117817	0.765507	0
PRRT2	27	6	4	2	0	1	0.117817	0.765507	-0.693147
SMAD4	27	6	1	1	4	1	0.117817	0.765507	3.04385
TMEM143	27	6	1	2	3	3	0.117817	0.765507	0
UBAP2L	27	6	2	0	4	2	0.117817	0.765507	1.99574
AFF4	9	3	0	0	3	2	0.118502	0.765507	1.03133
ARID4B	9	3	0	0	3	1	0.118502	0.765507	2.07944
ARL6IP4	9	3	1	1	1	1	0.118502	0.765507	0
CARHSP1	9	3	1	0	2	1	0.118502	0.765507	1.04811
CDC25B	9	3	0	0	3	1	0.118502	0.765507	2.07944
DENND1B	9	3	0	1	2	2	0.118502	0.765507	0
DNM1	9	3	0	0	3	1	0.118502	0.765507	2.07944
DR1	9	3	0	1	2	0	0.118502	0.765507	1.74126
ERGIC2	9	3	0	0	3	2	0.118502	0.765507	1.03133
ETV2	9	3	1	0	2	1	0.118502	0.765507	1.04811
GTPBP3	9	3	1	0	2	0	0.118502	0.765507	1.74126
LARS	9	3	0	0	3	1	0.118502	0.765507	2.07944
LRP8	9	3	1	0	2	1	0.118502	0.765507	1.04811
MAP2K3	9	3	0	0	3	0	0.118502	0.765507	2.77259
MAPK14	9	3	1	0	2	3	0.118502	0.765507	-1.03133
MEX3B	9	3	0	2	1	0	0.118502	0.765507	0.693147
NOB1	9	3	1	1	1	0	0.118502	0.765507	0.693147
RPS26	9	3	3	0	0	1	0.118502	0.765507	-0.693147
SEPT10	9	3	0	0	3	1	0.118502	0.765507	2.07944
SPCS1	9	3	1	0	2	0	0.118502	0.765507	1.74126
TOP1	9	3	0	1	2	1	0.118502	0.765507	1.04811
TSC22D3	9	3	0	1	2	2	0.118502	0.765507	0
TXNIP	9	3	2	1	0	1	0.118502	0.765507	-0.693147
UIMC1	9	3	0	0	3	1	0.118502	0.765507	2.07944
YWHAG	9	3	0	0	3	1	0.118502	0.765507	2.07944
ZC3H11A	9	3	0	0	3	0	0.118502	0.765507	2.77259
ZFYVE1	9	3	0	0	3	0	0.118502	0.765507	2.77259
ZNF581	9	3	0	1	2	3	0.118502	0.765507	-1.03133
SLC39A1	54	10	2	0	8	6	0.118539	0.765507	1.50218
ARSD	4	2	0	1	1	2	0.120101	0.765507	-1.04811
ATP5H	4	2	0	0	2	2	0.120101	0.765507	0
ATP5L	4	2	0	0	2	0	0.120101	0.765507	1.74126
ATPIF1	4	2	2	0	0	0	0.120101	0.765507	0
C11orf68	4	2	0	1	1	0	0.120101	0.765507	0.693147
C12orf43	4	2	0	0	2	1	0.120101	0.765507	1.04811
C15orf58	4	2	0	0	2	2	0.120101	0.765507	0
C4orf10	4	2	0	2	0	0	0.120101	0.765507	0
CBY1	4	2	0	0	2	0	0.120101	0.765507	1.74126
CCDC88B	4	2	1	0	1	0	0.120101	0.765507	0.693147
CCS	4	2	0	1	1	1	0.120101	0.765507	0
CHD1L	4	2	0	0	2	0	0.120101	0.765507	1.74126
COMP	4	2	1	0	1	0	0.120101	0.765507	0.693147
COPZ2	4	2	0	0	2	0	0.120101	0.765507	1.74126
COX8A	4	2	0	0	2	0	0.120101	0.765507	1.74126
CSF1	4	2	1	1	0	0	0.120101	0.765507	0
CYBRD1	4	2	1	1	0	1	0.120101	0.765507	-0.693147
DGKI	4	2	0	0	2	2	0.120101	0.765507	0
DNAJB6	4	2	0	0	2	0	0.120101	0.765507	1.74126
DNAJC30	4	2	1	1	0	0	0.120101	0.765507	0
EEF1E1	4	2	0	0	2	1	0.120101	0.765507	1.04811
ERO1L	4	2	0	0	2	0	0.120101	0.765507	1.74126
HNRNPA0	4	2	2	0	0	0	0.120101	0.765507	0
IRF5	4	2	0	0	2	0	0.120101	0.765507	1.74126
JMJD6	4	2	0	1	1	0	0.120101	0.765507	0.693147
KCNJ4	4	2	0	0	2	0	0.120101	0.765507	1.74126
MAPK12	4	2	0	1	1	0	0.120101	0.765507	0.693147
MCM7	4	2	0	1	1	2	0.120101	0.765507	-1.04811
MIF	4	2	1	1	0	0	0.120101	0.765507	0
MMP11	4	2	0	0	2	0	0.120101	0.765507	1.74126
MPP6	4	2	0	0	2	1	0.120101	0.765507	1.04811
MRFAP1L1	4	2	2	0	0	0	0.120101	0.765507	0
NAA30	4	2	0	0	2	1	0.120101	0.765507	1.04811
NEK1	4	2	0	0	2	2	0.120101	0.765507	0
NOL8	4	2	0	0	2	1	0.120101	0.765507	1.04811
NT5C3L	4	2	0	0	2	0	0.120101	0.765507	1.74126
[truncated: 6,490 more rows]

## Sheet: APC suppressor
	Unsorted cells	Sorted cells					Derived from columns B and C		Derived from columns F and G
[truncated: 11,025 more rows]

[truncated: 1 more sheets: CSNK1A1 suppressor]
