# Supplementary material for: Comparative genetic screens in human cells reveal new regulatory mechanisms in WNT signaling
Source: eLife journal article supplement (doi:10.7554/elife.21459), 2016-12-20
Supplement: supp [file elife_poa_e21459_Supplementary_File_2.xlsx]

## Sheet: Single mutant clones
Clone Name	Clone #	CRISPR Guide	Genomic Sequence	Mutation	Genotype	Observations	Figures
Reference		TFAP4_sgRNA_Ex6_II	CGTGCCAGCACCGCCTCCTCCTCCCTCCCACCACATCAATGTCGTCACCATGGGCCCCTCCTCGGTCATCAACTCTGTTT
TFAP4CR-1	28	TFAP4_sgRNA_Ex6_II	undetermined	large rearrangement	loss of coding sequence: no protein product	no PCR product with primers 2.5 kbp 5' and 3' of target site.	2A, 2B, 2C, 2D
TFAP4CR-2	18	TFAP4_sgRNA_Ex6_II	CGTGCCAGCACCGCCTCCTCCTCCCTCCCACCACATCAATGTCGTCAACCATGGGCCCCTCCTCGGTCATCAACTCTGTT	1 bp insertion	frameshift: truncated protein product		2A, 2C
Reference		AXIN2_sgRNA_Ex11	GCTTGACCCTGGGCCACTTTAAAGAGCAGCTCAGCAAAAAGGGAAATTATAGGTAAGAGTCCTGTGGCTTTTTTCTGCTC
WT	6	AXIN2_sgRNA_Ex11	GCTTGACCCTGGGCCACTTTAAAGAGCAGCTCAGCAAAAAGGGAAATTATAGGTAAGAGTCCTGTGGCTTTTTTCTGCTC	none	WT		3C
AXIN2ΔC	8	AXIN2_sgRNA_Ex11	GCTTGACCCTGGGCCACTTTAAAGAGCAGCTCAGCAAAAAGGGAAATATATAGGTAAGAGTCCTGTGGCTTTTTTCTGCT	1 bp insertion	frameshift: truncated protein product (802 STOP)		3C, 3D, 3E, 3-f.s.1C, 3-f.s.2C,
AXIN2ΔC	16	AXIN2_sgRNA_Ex11	GCTTGACCCTGGGCCACTTTAAAGAGCAGCTCAGCAAAAAGGGA----------AAGAGTCCTGTGGCTTTTTTCTGCTC	10 bp deletion	frameshift: truncated protein product (808 STOP)		3C
AXIN2ΔC	19	AXIN2_sgRNA_Ex11	GCTTGACCCTGGGCCACTTTAAAGAGCAGCTCAGCAAAAAGGGAAATTTATAGGTAAGAGTCCTGTGGCTTTTTTCTGCT	1 bp insertion	frameshift: truncated protein product (802 STOP)		3C, 3D, 3-f.s.1C
AXIN2ΔC	24	AXIN2_sgRNA_Ex11	GCTTGACCCTGGGCCACTTTAAAGAG----------------------[331bp]TATAGGTAAGAGTCCTGTGGCTTTT	22 bp deletion + 331 bp insertion	frameshift: truncated protein product (808 STOP)		3C
Reference		AXIN2_sgRNA_Ex10	TTCCATCTTATTTTCAGTCACAAAGAGCCAAAGAAACTGGCAGGTGTCCACGCGCTCCAGGCCAGTGAGTTGGTTGTCAC
WT	30	AXIN2_sgRNA_Ex10	TTCCATCTTATTTTCAGTCACAAAGAGCCAAAGAAACTGGCAGGTGTCCACGCGCTCCAGGCCAGTGAGTTGGTTGTCAC	none	WT		3C
AXIN2ΔDAX	5	AXIN2_sgRNA_Ex10	TTCCATCTTATTTTCAGTCACAAAGAGCCA-----------------------------------------------...	119 bp deletion	frameshift: truncated protein product (752 STOP)		3C, 3E, 3-f.s.2D
AXIN2ΔDAX	11	AXIN2_sgRNA_Ex10	...---------------------------------------------CACGCGCTCCAGGCCAGTGAGTTGGTTGTCAC	103 bp deletion	frameshift: truncated protein product (788 STOP)	PCR product visibly smaller; expected to delete intron 9/exon 10 splice junction and remove exon 10, resulting in an in-frame fusion of exon 9 and 11.	3C
AXIN2ΔDAX	29	AXIN2_sgRNA_Ex10	TTCCATCTTATTTTCAGTCACAA------------------------------------------------------...	107 bp deletion	frameshift: truncated protein product (756 STOP)		3C
Reference		AXIN2_sgRNA_Ex1	AGGTCACCAAACCCATGCCTGTCTCTTCCAACACCAGGCGGAACGAAGATGGGTTGGGGGAGCCGGAGGGGCGGGCATCT
WT	33	AXIN2_sgRNA_Ex1	AGGTCACCAAACCCATGTCTGTCTCTTCCAACACCAGGCGGAACGAAGATGGGTTGGGGGAGCCGGAGGGGCGGGCATCT	none	WT		3C
AXIN2KO	6	AXIN2_sgRNA_Ex1	AGGTCACCAAACCCATGTCTGTCTCTTCCAACACCAGGCGGAACGAA[289bp]GATGGGTTGGGGGAGCCGGAGGGGCG	289 bp insertion	frameshift	PCR product is visibly larger	3C, 3-f.s.1A, 3-f.s.1B
AXIN2KO	9	AXIN2_sgRNA_Ex1	AGGTCACCAAACCCATGTCTGTCTCTTCCAACACCAGGCGGAACGAAAGATGGGTTGGGGGAGCCGGAGGGGCGGGCATC	1 bp insertion	frameshift		3C
AXIN2KO	27	AXIN2_sgRNA_Ex1	AGGTCACCAAACCCATGTCTGTCTCTTCCAACACCAGGCGGAACGAA----------------------GGCGGGCATCT	22 bp deletion	frameshift		3C, 3-f.s.1A, 3-f.s.1B
AXIN2KO	29	AXIN2_sgRNA_Ex1	AGGTCACCAAACCCATGTCTGTCTCTTCCAACACCAGGCGGAACG--------------------------------...	107 bp deletion	frameshift		3C
Reference		AXIN1_sgRNA_Ex1_I	CAAAATGAATATCCAAGAGCAGGGTTTCCCCTTGGACCTCGGAGCAAGTTTCACCGAAGATGCTCCCCGACCCCCAGTGC
AXIN1KO	38	AXIN1_sgRNA_Ex1_I	CAAAATGAATATCCAAGAGCAGGGTTTCC----------CGGAGCAAGTTTCACCGAAGATGCTCCCCGACCCCCAGTGC	10 bp deletion	frameshift		3-f.s.1A, 3-f.s.1B
Reference		AXIN1_sgRNA_Ex1_II	CTGGATGACCAAGATGGGATAAGCCTGTTCAGGACTTTCCTGAAGCAGGAGGGCTGTGCCGACTTGCTGGACTTCTGGTT
AXIN1KO	30	AXIN1_sgRNA_Ex1_II	CTGGATGACCAAGATGGGATAAGCC-----------------------------------GACTTGCTGGACTTCTGGTT	35 bp deletion	frameshift		3-f.s.1A, 3-f.s.1B
Reference		PIGL_sgRNA_Ex3	AAAGGTGTTCAAGTTGTGCTTCTCTCTTGTAGGGATTTCCCAGATGACCCAGGCATGCAGTGGGACACAGAGCACGTGGC
WT	3	PIGL_sgRNA_Ex3	AAAGGTGTTCAAGTTGTGCTTCTCTCTTGTAGGGATTTCCCAGATGACCCAGGCATGCAGTGGGACACAGAGCACGTGGC	none	WT		4C, 4-f.s.1E
PIGLKO	1	PIGL_sgRNA_Ex3	AAAGGTGTTCAAGTTGTGCTTCTCTCTTGTAGGGATTTCCCAGATGA-----GCATGCAGTGGGACACAGAGCACGTGGC	5 bp deletion	frameshift		4C, 4-f.s.1E
PIGLKO	5	PIGL_sgRNA_Ex3	AAAGGTGTTCAAGTTGTGCTTCTCTCTTGTAGGGATTTCCC--------CAGGCATGCAGTGGGACACAGAGCACGTGGC	8 bp deletion	frameshift		4C, 4-f.s.1E
PIGLKO	14	PIGL_sgRNA_Ex3	AAAGGTGTTCAAGTTGTGCTTCTCTCTTGTAGGGATTTCCCAGATGA--CAGGCATGCAGTGGGACACAGAGCACGTGGC	2 bp deletion	frameshift		4C
Reference		GPC4_sgRNA_Ex3_II	GTGAGCAAGTATACGGAGCAGCTGAAGCCCTTCGGAGATGTCCCTCGCAAATTGAAGCTCCAGGTTACTCGTGCTTTTGT
WT	3	GPC4_sgRNA_Ex3_II	GTGAGCAAGTATACGGAGCAGCTGAAGCCCTTCGGAGATGTCCCTCGCAAATTGAAGCTCCAGGTTACTCGTGCTTTTGT	none	WT
GPC4KO	4	GPC4_sgRNA_Ex3_II	GTGAGCAAGTATACGGAGCAGCTGAA--------------------GCAAATTGAAGCTCCAGGTTACTCGTGCTTTTGT	20 bp deletion	frameshift		4C
GPC4KO	7	GPC4_sgRNA_Ex3_II	GTGAGCAAGTATACGGAGCAGCTGAAG--------------CCCTCGCAAATTGAAGCTCCAGGTTACTCGTGCTTTTGT	14 bp deletion	frameshift		4C
Reference		GPC4_sgRNA_Ex3_III	AAATTCTGAGCTATTTAAAGATCTCTTCGTAGAGTTGAAACGTTACTACGTGGTGGGAAATGTGAACCTGGAAGAAATGC
GPC4KO	14	GPC4_sgRNA_Ex3_III	AAATTCTGAGCTATTTAAAGATCTCTTCGTAGAGTTGAAACGTTACTTACGTGGTGGGAAATGTGAACCTGGAAGAAATGC	1 bp insertion	frameshift		4C
Reference		GPC6_sgRNA_Ex4_I	TCAACGTCATGAAGGGCTGCTTGGCAAATCAGGCTGACCTCGACACAGAGTGGAATCTGTTTATAGGTAAGAAGTGTTTA
WT	9	GPC6_sgRNA_Ex4_I	TCAACGTCATGAAGGGCTGCTTGGCAAATCAGGCTGACCTCGACACAGAGTGGAATCTGTTTATAGGTAAGAAGTGTTTA	none	WT
GPC6KO	1	GPC6_sgRNA_Ex4_I	TCAACGTCATGAAGGGCTGCTTGGCAAATCAGGCTGACCTCGACACAAGAGTGGAATCTGTTTATAGGTAAGAAGTGTTTA	1 bp insertion	frameshift		4C
GPC6KO	10	GPC6_sgRNA_Ex4_I	TCAACGTCATGAAGGGCTGCTTGGCAAATCAGGCTGACCTCGA-----------ATCTGTTTATAGGTAAGAAGTGTTTA	11 bp deletion	frameshift		4C
Reference		APC_sgRNA_Ex5	ATGTCCCTCCGTTCTTATGGAAGCCGGGAAGGATCTGTATCAAGCCGTTCTGGAGAGTGCAGTCCTGTTCCTATGGGTTC
APCKO-1	6	APC_sgRNA_Ex5	...---------------------------------------------TCTGGAGAGTGCAGTCCTGTTCCTATGGGTTC	155 bp deletion, 5bp insertion	frameshift		5B, 5-f.s.1A, 5-f.s.1B, 5-f.s.1C, 6I
APCKO-2	3	N/A	GGTTGCTTTTAGATAACACTGAATAAATATTTAAGATATT[gene trap]AATTCAGTGTGCAAATATTTTAAATTAAAGCAACATGGCT	GT insertion	Truncated transcript		6A, 6B, 6C, 6D
Reference		CSNK1A1_sgRNA_Ex2	GCTAGAATCTCAGAAGGCCAGGCATCCCCAGTTGCTGTACGAGAGCAAGCTCTATAAGATTCTTCAAGGTGGGGTTGGCA
CSNK1A1KO-1	8	CSNK1A1_sgRNA_Ex2	GCTAGAATCTCAGAAGGCCAGGCATCCCCA[473bp]GCTGTACGAGAGCAAGCTCTATAAGATTCTTCAAGGTGGGGTT	473 bp insertion	frameshift		5C, 5-f.s.1A, 5-f.s.1B, 5-f.s.1D, 6E, 6F, 6G, 6H
Reference		CSNK1A1_sgRNA_Ex3	CGGTGGTATGGTCAGGAAAAAGACTACAATGTACTAGTCATGGATCTTCTGGGACCTAGCCTCGAAGACCTCTTCAATTT
CSNK1A1KO-2	19	CSNK1A1_sgRNA_Ex3	CGGTGGTATGGTCAGGAAAAAGACTACAATGTACTAGTCAT------TCTGGGACCTAGCCTCGAAGACCTCTTCAATTT	6 bp deletion	2 amino acid deletion		6-f.s.1D
Reference		SERBP1_sgRNA_Ex1	TGCTGAAGGCAGCAGAGAACAAGAAAAAAGAAGCCGGCGGGGGCGGCGTTGGGGGCCCTGGGGCCAAGAGCGCAGCTCAG
WT	1	SERBP1_sgRNA_Ex1	TGCTGAAGGCAGCAGAGAACAAGAAAAAAGAAGCCGGCGGGGGCGGCGTTGGGGGCCCTGGGGCCAAGAGCGCAGCTCAG	none	WT		6-f.s.1A, 6-f.s.1B, 6-f.s.1C
WT	2	SERBP1_sgRNA_Ex1	TGCTGAAGGCAGCAGAGAACAAGAAAAAAGAAGCCGGCGGGGGCGGCGTTGGGGGCCCTGGGGCCAAGAGCGCAGCTCAG	none	WT		6-f.s.1A, 6-f.s.1B, 6-f.s.1C
SERBP1KO	28	SERBP1_sgRNA_Ex1	TGCTGAAGGCAGCAGAGAACAAGAAAAAAGAAGCCGGCGGGGGCGGCCGTTGGGGGCCCTGGGGCCAAGAGCGCAGCTCA	1 bp insertion	frameshift		6B, 6C, 6D
SERBP1KO	43	SERBP1_sgRNA_Ex1	TGCTGAAGGCAGCAGAGAACAAGAAAAAAGAAGCCGGCGGGGGCGGCCGTTGGGGGCCCTGGGGCCAAGAGCGCAGCTCA	1 bp insertion	frameshift		6-f.s.1A, 6-f.s.1B, 6-f.s.1C
SERBP1KO	48	SERBP1_sgRNA_Ex1	TGCTGAAGGCAGCAGAGAACAAGAAAAAAGAAGCCGGCGGGGGCGGCAGTTGGGGGCCCTGGGGCCAAGAGCGCAGCTCA	1 bp insertion	frameshift		6-f.s.1A, 6-f.s.1B, 6-f.s.1C
Reference		HUWE1_sgRNA_Ex1	AATTGAAATCATGAAAGTAGACAGGACTAAACTGAAGAAGACACCTACTGAGGCTGTAAGTATCCAAAAGTTTACTTTGC
WT	11	HUWE1_sgRNA_Ex1	AATTGAAATCATGAAAGTAGACAGGACTAAACTGAAGAAGACACCTACTGAGGCTGTAAGTATCCAAAAGTTTACTTTGC	none	WT		6-f.s.1E, 6-f.s.1F, 6-f.s.1G
HUWE1KO	12	HUWE1_sgRNA_Ex1	AATTGAAATCATGAAAGTAGACAGGACTAAACTGAAGAAGACACC-----------TAAGTATCCAAAAGTTTACTTTGC	11 bp deletion	frameshift		6F, 6G, 6H
Reference		HUWE1_sgRNA_Ex2	CAGAGCCTTAATAGACAAACTCAAAGTTTGTAATGATGAGCAACTTCTCTTGGAACTGCAGCAGATCAAAACATGGAACA
WT	27	HUWE1_sgRNA_Ex2	CAGAGCCTTAATAGACAAACTCAAAGTTTGTAATGATGAGCAACTTCTCTTGGAACTGCAGCAGATCAAAACATGGAACA	none	WT		6-f.s.1E, 6-f.s.1F, 6-f.s.1G
WT	30	HUWE1_sgRNA_Ex2	CAGAGCCTTAATAGACAAACTCAAAGTTTGTAATGATGAGCAACTTCTCTTGGAACTGCAGCAGATCAAAACATGGAACA	none	WT		6-f.s.1E, 6-f.s.1F, 6-f.s.1G
HUWE1KO	26	HUWE1_sgRNA_Ex2	CAGAGNCTTAATAGACAAACTCAAAGTTTGT----------------TCTTGGAACTGCAGCAGATCAAAACATGGAACA	16 bp deletion	frameshift		6-f.s.1E, 6-f.s.1F, 6-f.s.1G
HUWE1KO	28	HUWE1_sgRNA_Ex2	CAGAGNCTTAATAGACAAACTCAAAGTTTGTAATGATGAGCAACTTCTTCTTGGAACTGCAGCAGATCAAAACATGGAACA	1 bp insertion	frameshift		6-f.s.1E, 6-f.s.1F, 6-f.s.1G

## Sheet: Double or triple mutant clones
Clone Name	Clone #	CRISPR Guide 1	Genomic Sequence 1	Mutation 1	Genotype 1	Observations 1	CRISPR Guide 2	Genomic Sequence 2	Mutation 2	Genotype 2	Observations 2	Figures	CRISPR Guide 3	Genomic Sequence 3	Mutation 3	Genotype 3
Reference		AXIN2_sgRNA_Ex1	AGGTCACCAAACCCATGCCTGTCTCTTCCAACACCAGGCGGAACGAAGATGGGTTGGGGGAGCCGGAGGGGCGGGCATCT				AXIN1_sgRNA_Ex1_I	CAAAATGAATATCCAAGAGCAGGGTTTCCCCTTGGACCTCGGAGCAAGTTTCACCGAAGATGCTCCCCGACCCCCAGTGC
AXIN1KO; AXIN2KO	7	AXIN2_sgRNA_Ex1	AGGTCACCAAACCCATGTCTGTCTCTTCCAACACCAGGCGGAACGA-GATGGGTTGGGGGAGCCGGAGGGGCGGGCATCT	1 bp deletion			AXIN1_sgRNA_Ex1_I	CAAAATGAATATCCAAGAGCAGGGTTTCCCTGCT-------------------------------------------...	545 bp deletion, 4 bp insertion	frameshift	PCR product is visibly smaller	3-f.s.1A, 3-f.s.1B
Reference		AXIN2_sgRNA_Ex11	GCTTGACCCTGGGCCACTTTAAAGAGCAGCTCAGCAAAAAGGGAAATTATAGGTAAGAGTCCTGTGGCTTTTTTCTGCTC				AXIN1_sgRNA_Ex1_I	CAAAATGAATATCCAAGAGCAGGGTTTCCCCTTGGACCTCGGAGCAAGTTTCACCGAAGATGCTCCCCGACCCCCAGTGC
AXIN1KO; AXIN2ΔC	8-12	AXIN2_sgRNA_Ex11	GCTTGACCCTGGGCCACTTTAAAGAGCAGCTCAGCAAAAAGGGAAATATATAGGTAAGAGTCCTGTGGCTTTTTTCTGCT	1 bp insertion	frameshift: truncated protein product (802 STOP)		AXIN1_sgRNA_Ex1_I	CAAAATGAATATCCAAGAGCAGGGTTTCCCC-------------------------------------GACCCCCAGTGC	37 bp deletion	frameshift	PCR product is visibly smaller	3F, 3-f.s.1A, 3-f.s.2A, 3-f.s.2E
Reference		AXIN2_sgRNA_Ex11	GCTTGACCCTGGGCCACTTTAAAGAGCAGCTCAGCAAAAAGGGAAATTATAGGTAAGAGTCCTGTGGCTTTTTTCTGCTC				AXIN1_sgRNA_Ex1_II	CTGGATGACCAAGATGGGATAAGCCTGTTCAGGACTTTCCTGAAGCAGGAGGGCTGTGCCGACTTGCTGGACTTCTGGTT
AXIN1KO; AXIN2ΔC	8-45	AXIN2_sgRNA_Ex11	GCTTGACCCTGGGCCACTTTAAAGAGCAGCTCAGCAAAAAGGGAAATATATAGGTAAGAGTCCTGTGGCTTTTTTCTGCT	1 bp insertion	frameshift: truncated protein product (802 STOP)		AXIN1_sgRNA_Ex1_II	CTGGATGACCAAGATGGGATAAGCCTGT-----------------------------GCCGACTTGCTGGACTTCTGGTT	29 bp deletion	frameshift		3F, 3-f.s.1A
Reference		AXIN2_sgRNA_Ex10	TTCCATCTTATTTTCAGTCACAAAGAGCCAAAGAAACTGGCAGGTGTCCACGCGCTCCAGGCCAGTGAGTTGGTTGTCAC				AXIN1_sgRNA_Ex1_I	CAAAATGAATATCCAAGAGCAGGGTTTCCCCTTGGACCTCGGAGCAAGTTTCACCGAAGATGCTCCCCGACCCCCAGTGC
AXIN1KO; AXIN2ΔDAX	5-6	AXIN2_sgRNA_Ex10	TTCCATCTTATTTTCAGTCACAAAGAGCCA-----------------------------------------------...	119 bp deletion	frameshift: truncated protein product (752 STOP)		AXIN1_sgRNA_Ex1_I	CAAAATGAATATCCAAGAGCAGGGTTTCCCCTTGGGACCTCGGAGCAAGTTTCACCGAAGATGCTCCCCGACCCCCAGTG	1bp insertion	frameshift		3F, 3-f.s.1A, 3-f.s.2F
AXIN1KO; AXIN2ΔDAX	5-20	AXIN2_sgRNA_Ex10	TTCCATCTTATTTTCAGTCACAAAGAGCCA-----------------------------------------------...	119 bp deletion	frameshift: truncated protein product (752 STOP)		AXIN1_sgRNA_Ex1_I	CAAAATGAATATCCAAGAGCAGGGTTTCCCCTTGTGGACCTCGGAGCAAGTTTCACCGAAGATGCTCCCCGACCCCCAGT	2bp insertion	frameshift		3F, 3-f.s.1A
Reference		GPC4_sgRNA_Ex3_III + GPC4_sgRNA_Ex3_II	AAATTCTGAGCTATTTAAAGATCTCTTCGTAGAGTTGAAACGTTACTACGTGGTGGGAAATGTGAACCTGGAAGAAATGCTAAATGACTTCTGGGCTCGCCTCCTGGAGCGGATGTTCCGCCTGGTGAACTCCCAGTACCACTTTACAGATGAGTATCTGGAATGTGTGAGCAAGTATACGGAGCAGCTGAAGCCCTTCGGAGATGTCCCTCGCAAATTGAAGCTCCAGGTTACTCGTGCTTTTGT				GPC6_sgRNA_Ex4_I	TCAACGTCATGAAGGGCTGCTTGGCAAATCAGGCTGACCTCGACACAGAGTGGAATCTGTTTATAGGTAAGAAGTGTTTA
WT	1	GPC4_sgRNA_Ex3_III + GPC4_sgRNA_Ex3_II	AAATTCTGAGCTATTTAAAGATCTCTTCGTAGAGTTGAAACGTTACTACGTGGTGGGAAATGTGAACCTGGAAGAAATGCTAAATGACTTCTGGGCTCGCCTCCTGGAGCGGATGTTCCGCCTGGTGAACTCCCAGTACCACTTTACAGATGAGTATCTGGAATGTGTGAGCAAGTATACGGAGCAGCTGAAGCCCTTCGGAGATGTCCCTCGCAAATTGAAGCTCCAGGTTACTCGTGCTTTTGT	none	WT		GPC6_sgRNA_Ex4_I	TCAACGTCATGAAGGGCTGCTTGGCAAATCAGGCTGACCTCGACACAGAGTGGAATCTGTTTATAGGTAAGAAGTGTTTA	none	WT		4C, 4-f.s.1E
GPC4KO; GPC6KO	9	GPC4_sgRNA_Ex3_III + GPC4_sgRNA_Ex3_II	AAATTCTGAGCTATTTAAAGATCTCTTCGTAGAGTTGAAACGTTAC⎼ACGTGGTGGGAAATGTGAACCTGGAAGAAATGCTAAATGACTTCTGGGCTCGCCTCCTGGAGCGGATGTTCCGCCTGGTGAACTCCCAGTACCACTTTACAGATGAGTATCTGGAATGTGTGAGCAAGTATACGGAGCAGCTGAAGCCCT--------------CGCAAATTGAAGCTCCAGGTTACTCGTGCTTTTGT	1 bp deletion / 14 bp deletion	frameshift		GPC6_sgRNA_Ex4_I	TCAACGTCATGAAGGGCTGCTTGGCAAATCAGGCTGACCTCGACACAAGAGTGGAATCTGTTTATAGGTAAGAAGTGTTTA	1 bp insertion	frameshift		4C, 4-f.s.1E
GPC4KO; GPC6KO	26	GPC4_sgRNA_Ex3_III + GPC4_sgRNA_Ex3_II	AAATTCTGAGCTATTTAAAGATCTCTTCGTAGAGTTGAAACGTTACT--------------------------------------------------------------------------------------------------------------------------------------------------------GGAGATGTCCCTCGCAAATTGAAGCTCCAGGTTACTCGTGCTTTTGT	152 bp deletion	frameshift	PCR product is visibly smaller	GPC6_sgRNA_Ex4_I	TCAACGTCATGAAGGGCTGCTTGGCAAATCAGGCTGACCTCGACACA-------------TTATAGGTAAGAAGTGTTTA	13 bp deletion	frameshift		4C, 4-f.s.1E
Reference		LGR4_sgRNA_Ex1	GCGAGCAGCGCCGCGGGAGAGGCCGGCGCGGGAGGCGGCCGCAGCAATGCCGGGCCCGCTAGGGCTGCTCTGCTTCCTCG				LGR5_sgRNA_Ex16 + LGR5_sgRNA_Ex17	AAGGGTTATAGAAATGCCTTATGCTTACCAGTGCTGTGCATTTGGAGTGTGTGAGAATGCCTATAAGATTTCTAATCAAT[2125bp]TGCTTGACTTTGAGGAAGACCTGAAAGCCCTTCATTCAGTGCAGTGTTCACCTTCCCCAGGTGAGAAAGGCATCAAAAAT					LGR6_sgRNA_Ex8	GGGGGTTCCATAACAACAACATCAAGGCCATCCCAGAAAAGGCCTTCATGGGGAACCCTCTGCTACAGACGATGTGAGTA
LGR4KO; LGR5KO; LGR5KO	17	LGR4_sgRNA_Ex1	GCGAGCAGCGCCGCGGGAGAGGCCGGCGCGGGAGGCGGCCGCAGCAA---------CGCTAGGGCTGCTCTGCTTCCTCG	9 bp deletion	start codon mutated from ATG (Met) to ACG (Thr)		LGR5_sgRNA_Ex16 + LGR5_sgRNA_Ex17	AAGGGTTATAGAAATGCCTTATGCTTACCAGTG-----------------------------------------------... ---------------------------------ATTCAGTGCAGTGTTCACCTTCCCCAGGTGAGAAAGGCATCAAAAAT	2205 bp deletion	frameshift	PCR product is visibly smaller	4C, 4-f.s.1E	LGR6_sgRNA_Ex8	GGGGGTTCCATAACAACAACATCAAGGCCATCCCAGAAAAGGCCTTCCATGGGGAACCCTCTGCTACAGACGATGTGAGTA	1bp insertion	frameshift
Reference		N/A	GGTTGCTTTTAGATAACACTGAATAAATATTTAAGATATTAATTCAGTGTGCAAATATTTTAAATTAAAGCAACATGGCT				SERBP1_sgRNA_Ex1	TGCTGAAGGCAGCAGAGAACAAGAAAAAAGAAGCCGGCGGGGGCGGCGTTGGGGGCCCTGGGGCCAAGAGCGCAGCTCAG
APCKO-2	3-1	N/A	GGTTGCTTTTAGATAACACTGAATAAATATTTAAGATATT[gene trap]AATTCAGTGTGCAAATATTTTAAATTAAAGCAACATGGCT	gene trap integration	frameshift		SERBP1_sgRNA_Ex1	TGCTGAAGGCAGCAGAGAACAAGAAAAAAGAAGCCGGCGGGGGCGGCGTTGGGGGCCCTGGGGCCAAGAGCGCAGCTCAG	none	WT		6A, 6-f.s.1A, 6-f.s.1B, 6-f.s.1C
APCKO-2	3-5	N/A	GGTTGCTTTTAGATAACACTGAATAAATATTTAAGATATT[gene trap]AATTCAGTGTGCAAATATTTTAAATTAAAGCAACATGGCT	gene trap integration	frameshift		SERBP1_sgRNA_Ex1	TGCTGAAGGCAGCAGAGAACAAGAAAAAAGAAGCCGGCGGGGGCGGCGTTGGGGGCCCTGGGGCCAAGAGCGCAGCTCAG	none	WT		6A
APCKO-2	3-6	N/A	GGTTGCTTTTAGATAACACTGAATAAATATTTAAGATATT[gene trap]AATTCAGTGTGCAAATATTTTAAATTAAAGCAACATGGCT	gene trap integration	frameshift		SERBP1_sgRNA_Ex1	TGCTGAAGGCAGCAGAGAACAAGAAAAAAGAAGCCGGCGGGGGCGGCGTTGGGGGCCCTGGGGCCAAGAGCGCAGCTCAG	none	WT		6A
APCKO-2	3-9	N/A	GGTTGCTTTTAGATAACACTGAATAAATATTTAAGATATT[gene trap]AATTCAGTGTGCAAATATTTTAAATTAAAGCAACATGGCT	gene trap integration	frameshift		SERBP1_sgRNA_Ex1	TGCTGAAGGCAGCAGAGAACAAGAAAAAAGAAGCCGGCGGGGGCGGCGTTGGGGGCCCTGGGGCCAAGAGCGCAGCTCAG	none	WT		6A, 6-f.s.1A, 6-f.s.1B, 6-f.s.1C
APCKO-2	3-12	N/A	GGTTGCTTTTAGATAACACTGAATAAATATTTAAGATATT[gene trap]AATTCAGTGTGCAAATATTTTAAATTAAAGCAACATGGCT	gene trap integration	frameshift		SERBP1_sgRNA_Ex1	TGCTGAAGGCAGCAGAGAACAAGAAAAAAGAAGCCGGCGGGGGCGGCGTTGGGGGCCCTGGGGCCAAGAGCGCAGCTCAG	none	WT		6A, 6-f.s.1A, 6-f.s.1B, 6-f.s.1C
APCKO-2	3-20	N/A	GGTTGCTTTTAGATAACACTGAATAAATATTTAAGATATT[gene trap]AATTCAGTGTGCAAATATTTTAAATTAAAGCAACATGGCT	gene trap integration	frameshift		SERBP1_sgRNA_Ex1	TGCTGAAGGCAGCAGAGAACAAGAAAAAAGAAGCCGGCGGGGGCGGCGTTGGGGGCCCTGGGGCCAAGAGCGCAGCTCAG	none	WT		6A
APCKO-2	3-22	N/A	GGTTGCTTTTAGATAACACTGAATAAATATTTAAGATATT[gene trap]AATTCAGTGTGCAAATATTTTAAATTAAAGCAACATGGCT	gene trap integration	frameshift		SERBP1_sgRNA_Ex1	TGCTGAAGGCAGCAGAGAACAAGAAAAAAGAAGCCGGCGGGGGCGGCGTTGGGGGCCCTGGGGCCAAGAGCGCAGCTCAG	none	WT		6A
APCKO-2	3-26	N/A	GGTTGCTTTTAGATAACACTGAATAAATATTTAAGATATT[gene trap]AATTCAGTGTGCAAATATTTTAAATTAAAGCAACATGGCT	gene trap integration	frameshift		SERBP1_sgRNA_Ex1	TGCTGAAGGCAGCAGAGAACAAGAAAAAAGAAGCCGGCGGGGGCGGCGTTGGGGGCCCTGGGGCCAAGAGCGCAGCTCAG	none	WT		6A
APCKO-2	3-27	N/A	GGTTGCTTTTAGATAACACTGAATAAATATTTAAGATATT[gene trap]AATTCAGTGTGCAAATATTTTAAATTAAAGCAACATGGCT	gene trap integration	frameshift		SERBP1_sgRNA_Ex1	TGCTGAAGGCAGCAGAGAACAAGAAAAAAGAAGCCGGCGGGGGCGGCGTTGGGGGCCCTGGGGCCAAGAGCGCAGCTCAG	none	WT		6A
APCKO-2; SERBP1KO	3-3	N/A	GGTTGCTTTTAGATAACACTGAATAAATATTTAAGATATT[gene trap]AATTCAGTGTGCAAATATTTTAAATTAAAGCAACATGGCT	gene trap integration	frameshift		SERBP1_sgRNA_Ex1	TGCTGAAGGCAGCAGAGAACAAGAAAAAAGAAGCCGGCGGGGGCGGC--TGGGGGCCCTGGGGCCAAGAGCGCAGCTCAG	2 bp deletion	frameshift		6A, 6-f.s.1A, 6-f.s.1B, 6-f.s.1C
APCKO-2; SERBP1KO	3-8	N/A	GGTTGCTTTTAGATAACACTGAATAAATATTTAAGATATT[gene trap]AATTCAGTGTGCAAATATTTTAAATTAAAGCAACATGGCT	gene trap integration	frameshift		SERBP1_sgRNA_Ex1	The entire sequence in this range was deleted	262 bp deletion + 34 bp insertion	frameshift	PCR product is visibly smaller	6A, 6-f.s.1A, 6-f.s.1B, 6-f.s.1C
APCKO-2; SERBP1KO	3-11	N/A	GGTTGCTTTTAGATAACACTGAATAAATATTTAAGATATT[gene trap]AATTCAGTGTGCAAATATTTTAAATTAAAGCAACATGGCT	gene trap integration	frameshift		SERBP1_sgRNA_Ex1	TGCTGAAGGCAGCAGAGAACAAGAAAAAAGAAGCCGGCGGGGGCGGCTGTTGGGGGCCCTGGGGCCAAGAGCGCAGCTCA	1 bp insertion	frameshift		6A
APCKO-2; SERBP1KO	3-13	N/A	GGTTGCTTTTAGATAACACTGAATAAATATTTAAGATATT[gene trap]AATTCAGTGTGCAAATATTTTAAATTAAAGCAACATGGCT	gene trap integration	frameshift		SERBP1_sgRNA_Ex1	TGCTGAAGGCAGCAGAGAACAAGAAAAAAGAAGCCGGCGGGGGCGGC----GGGGCCCTGGGGCCAAGAGCGCAGCTCAG	4 bp deletion	frameshift		6A, 6-f.s.1A, 6-f.s.1B, 6-f.s.1C
APCKO-2; SERBP1KO	3-14	N/A	GGTTGCTTTTAGATAACACTGAATAAATATTTAAGATATT[gene trap]AATTCAGTGTGCAAATATTTTAAATTAAAGCAACATGGCT	gene trap integration	frameshift		SERBP1_sgRNA_Ex1	Partial alignment	large rearrangement	frameshift	PCR product is visibly smaller	6A
APCKO-2; SERBP1KO	3-15	N/A	GGTTGCTTTTAGATAACACTGAATAAATATTTAAGATATT[gene trap]AATTCAGTGTGCAAATATTTTAAATTAAAGCAACATGGCT	gene trap integration	frameshift		SERBP1_sgRNA_Ex1	TGCTGAAGGCAGCAGAGAACAAGAAAAAAGAAGCCGGCGGGGGCGGCCGTTGGGGGCCCTGGGGCCAAGAGCGCAGCTCA	1 bp insertion	frameshift		6A, 6B, 6C, 6D
APCKO-2; SERBP1KO	3-17	N/A	GGTTGCTTTTAGATAACACTGAATAAATATTTAAGATATT[gene trap]AATTCAGTGTGCAAATATTTTAAATTAAAGCAACATGGCT	gene trap integration	frameshift		SERBP1_sgRNA_Ex1	TGCTGAAGGCAGCAGAGAACAAGAAAAAAGAAGCCGGCGGGGGCGGC-TTGGGGGCCCTGGGGCCAAGAGCGCAGCTCAG	1 bp deletion	frameshift		6A
APCKO-2; SERBP1KO	3-21	N/A	GGTTGCTTTTAGATAACACTGAATAAATATTTAAGATATT[gene trap]AATTCAGTGTGCAAATATTTTAAATTAAAGCAACATGGCT	gene trap integration	frameshift		SERBP1_sgRNA_Ex1	TGCTGAAGGCAGCAGAGAACAAGAAAAAAGA--------------------------------------GCGCAGCTCAG	38 bp deletion	frameshift	PCR product is visibly smaller	6A, 6-f.s.1A, 6-f.s.1B, 6-f.s.1C
APCKO-2; SERBP1KO	3-23	N/A	GGTTGCTTTTAGATAACACTGAATAAATATTTAAGATATT[gene trap]AATTCAGTGTGCAAATATTTTAAATTAAAGCAACATGGCT	gene trap integration	frameshift		SERBP1_sgRNA_Ex1	Partial alignment	large rearrangement	frameshift	PCR product is visibly smaller	6A
APCKO-2; SERBP1KO	3-24	N/A	GGTTGCTTTTAGATAACACTGAATAAATATTTAAGATATT[gene trap]AATTCAGTGTGCAAATATTTTAAATTAAAGCAACATGGCT	gene trap integration	frameshift		SERBP1_sgRNA_Ex1	TGCTGAAGGCAGCAGAGAACAAGAAAAAAGAAGCCGGCGGGGG----GTTGGGGGCCCTGGGGCCAAGAGCGCAGCTCAG	4 bp deletion	frameshift		6A
Reference		CSNK1A1_sgRNA_Ex2	GCTAGAATCTCAGAAGGCCAGGCATCCCCAGTTGCTGTACGAGAGCAAGCTCTATAAGATTCTTCAAGGTGGGGTTGGCA				HUWE1_sgRNA_Ex1	AATTGAAATCATGAAAGTAGACAGGACTAAACTGAAGAAGACACCTACTGAGGCTGTAAGTATCCAAAAGTTTACTTTGC
CSNK1A1KO-1	8-8	CSNK1A1_sgRNA_Ex2	GCTAGAATCTCAGAAGGCCAGGCATCCCCA[473bp]GCTGTACGAGAGCAAGCTCTATAAGATTCTTCAAGGTGGGGTT	473 bp insertion	frameshift		HUWE1_sgRNA_Ex1	AATTGAAATCATGAAAGTAGACAGGACTAAACTGAAGAAGACACCTACTGAGGCTGTAAGTATCCAAAAGTTTACTTTGC	none	WT		6E
CSNK1A1KO-1	8-9	CSNK1A1_sgRNA_Ex2	GCTAGAATCTCAGAAGGCCAGGCATCCCCA[473bp]GCTGTACGAGAGCAAGCTCTATAAGATTCTTCAAGGTGGGGTT	473 bp insertion	frameshift		HUWE1_sgRNA_Ex1	AATTGAAATCATGAAAGTAGACAGGACTAAACTGAAGAAGACACCTACTGAGGCTGTAAGTATCCAAAAGTTTACTTTGC	none	WT		6E, 6-f.s.1E, 6-f.s.1F
CSNK1A1KO-1	8-11	CSNK1A1_sgRNA_Ex2	GCTAGAATCTCAGAAGGCCAGGCATCCCCA[473bp]GCTGTACGAGAGCAAGCTCTATAAGATTCTTCAAGGTGGGGTT	473 bp insertion	frameshift		HUWE1_sgRNA_Ex1	AATTGAAATCATGAAAGTAGACAGGACTAAACTGAAGAAGACACCTACTGAGGCTGTAAGTATCCAAAAGTTTACTTTGC	none	WT		6E
CSNK1A1KO-1	8-14	CSNK1A1_sgRNA_Ex2	GCTAGAATCTCAGAAGGCCAGGCATCCCCA[473bp]GCTGTACGAGAGCAAGCTCTATAAGATTCTTCAAGGTGGGGTT	473 bp insertion	frameshift		HUWE1_sgRNA_Ex1	AATTGAAATCATGAAAGTAGACAGGACTAAACTGAAGAAGACACCTACTGAGGCTGTAAGTATCCAAAAGTTTACTTTGC	none	WT		6E
CSNK1A1KO-1; HUWE1KO	8-2	CSNK1A1_sgRNA_Ex2	GCTAGAATCTCAGAAGGCCAGGCATCCCCA[473bp]GCTGTACGAGAGCAAGCTCTATAAGATTCTTCAAGGTGGGGTT	473 bp insertion	frameshift		HUWE1_sgRNA_Ex1	Undetermined			No PCR product	6E
CSNK1A1KO-1; HUWE1KO	8-3	CSNK1A1_sgRNA_Ex2	GCTAGAATCTCAGAAGGCCAGGCATCCCCA[473bp]GCTGTACGAGAGCAAGCTCTATAAGATTCTTCAAGGTGGGGTT	473 bp insertion	frameshift		HUWE1_sgRNA_Ex1	AATTGAAATCATGAAAGTAGACAGGACTAAACTGAAGAAG--------------CGTAAGTATCCAAAAGTTTACTTTGC	15 bp deletion + 1 bp insertion	frameshift		6E
CSNK1A1KO-1; HUWE1KO	8-4	CSNK1A1_sgRNA_Ex2	GCTAGAATCTCAGAAGGCCAGGCATCCCCA[473bp]GCTGTACGAGAGCAAGCTCTATAAGATTCTTCAAGGTGGGGTT	473 bp insertion	frameshift		HUWE1_sgRNA_Ex1	AATTGAAATCATGAAAGTAGACAGGACTAAACTGAAGAAGACACCTAACTGAGGCTGTAAGTATCCAAAAGTTTACTTTG	1 bp insertion	frameshift		6E
CSNK1A1KO-1; HUWE1KO	8-5	CSNK1A1_sgRNA_Ex2	GCTAGAATCTCAGAAGGCCAGGCATCCCCA[473bp]GCTGTACGAGAGCAAGCTCTATAAGATTCTTCAAGGTGGGGTT	473 bp insertion	frameshift		HUWE1_sgRNA_Ex1	AATTGAAATCATGAAAGTAGACAGGACTAAACTGAAGAAGACACCTAACTGAGGCTGTAAGTATCCAAAAGTTTACTTTG	1 bp insertion	frameshift		6E
CSNK1A1KO-1; HUWE1KO	8-6	CSNK1A1_sgRNA_Ex2	GCTAGAATCTCAGAAGGCCAGGCATCCCCA[473bp]GCTGTACGAGAGCAAGCTCTATAAGATTCTTCAAGGTGGGGTT	473 bp insertion	frameshift		HUWE1_sgRNA_Ex1	Partial alignment			Mixed sequence downstream of cut site	6E
CSNK1A1KO-1; HUWE1KO	8-7	CSNK1A1_sgRNA_Ex2	GCTAGAATCTCAGAAGGCCAGGCATCCCCA[473bp]GCTGTACGAGAGCAAGCTCTATAAGATTCTTCAAGGTGGGGTT	473 bp insertion	frameshift		HUWE1_sgRNA_Ex1	AATTGAAATCATGAAAGTAGACAGGACTAAACTGAAGAAGACACCTA[73bp]CTGAGGCTGTAAGTATCCAAAAGTTTA	73 bp insertion	frameshift	PCR product is visibly larger	6E, 6-f.s.1E, 6-f.s.1F
Reference		CSNK1A1_sgRNA_Ex2	GCTAGAATCTCAGAAGGCCAGGCATCCCCAGTTGCTGTACGAGAGCAAGCTCTATAAGATTCTTCAAGGTGGGGTTGGCA				HUWE1_sgRNA_Ex2	CAGAGCCTTAATAGACAAACTCAAAGTTTGTAATGATGAGCAACTTCTCTTGGAACTGCAGCAGATCAAAACATGGAACA				6E
CSNK1A1KO-1	8-24	CSNK1A1_sgRNA_Ex2	GCTAGAATCTCAGAAGGCCAGGCATCCCCA[473bp]GCTGTACGAGAGCAAGCTCTATAAGATTCTTCAAGGTGGGGTT	473 bp insertion	frameshift		HUWE1_sgRNA_Ex2	CAGAGCCTTAATAGACAAACTCAAAGTTTGTAATGATGAGCAACTTCTCTTGGAACTGCAGCAGATCAAAACATGGAACA	none	WT		6E
CSNK1A1KO-1	8-25	CSNK1A1_sgRNA_Ex2	GCTAGAATCTCAGAAGGCCAGGCATCCCCA[473bp]GCTGTACGAGAGCAAGCTCTATAAGATTCTTCAAGGTGGGGTT	473 bp insertion	frameshift		HUWE1_sgRNA_Ex2	CAGAGCCTTAATAGACAAACTCAAAGTTTGTAATGATGAGCAACTTCTCTTGGAACTGCAGCAGATCAAAACATGGAACA	none	WT		6E
CSNK1A1KO-1	8-27	CSNK1A1_sgRNA_Ex2	GCTAGAATCTCAGAAGGCCAGGCATCCCCA[473bp]GCTGTACGAGAGCAAGCTCTATAAGATTCTTCAAGGTGGGGTT	473 bp insertion	frameshift		HUWE1_sgRNA_Ex2	CAGAGCCTTAATAGACAAACTCAAAGTTTGTAATGATGAGCAACTTCTCTTGGAACTGCAGCAGATCAAAACATGGAACA	none	WT		6E, 6-f.s.1E, 6-f.s.1F
CSNK1A1KO-1	8-28	CSNK1A1_sgRNA_Ex2	GCTAGAATCTCAGAAGGCCAGGCATCCCCA[473bp]GCTGTACGAGAGCAAGCTCTATAAGATTCTTCAAGGTGGGGTT	473 bp insertion	frameshift		HUWE1_sgRNA_Ex2	CAGAGCCTTAATAGACAAACTCAAAGTTTGTAATGATGAGCAACTTCTCTTGGAACTGCAGCAGATCAAAACATGGAACA	none	WT		6E
CSNK1A1KO-1	8-30	CSNK1A1_sgRNA_Ex2	GCTAGAATCTCAGAAGGCCAGGCATCCCCA[473bp]GCTGTACGAGAGCAAGCTCTATAAGATTCTTCAAGGTGGGGTT	473 bp insertion	frameshift		HUWE1_sgRNA_Ex2	CAGAGCCTTAATAGACAAACTCAAAGTTTGTAATGATGAGCAACTTCTCTTGGAACTGCAGCAGATCAAAACATGGAACA	none	WT		6E
CSNK1A1KO-1	8-33	CSNK1A1_sgRNA_Ex2	GCTAGAATCTCAGAAGGCCAGGCATCCCCA[473bp]GCTGTACGAGAGCAAGCTCTATAAGATTCTTCAAGGTGGGGTT	473 bp insertion	frameshift		HUWE1_sgRNA_Ex2	CAGAGCCTTAATAGACAAACTCAAAGTTTGTAATGATGAGCAACTTCTCTTGGAACTGCAGCAGATCAAAACATGGAACA	none	WT		6E
CSNK1A1KO-1	8-35	CSNK1A1_sgRNA_Ex2	GCTAGAATCTCAGAAGGCCAGGCATCCCCA[473bp]GCTGTACGAGAGCAAGCTCTATAAGATTCTTCAAGGTGGGGTT	473 bp insertion	frameshift		HUWE1_sgRNA_Ex2	CAGAGCCTTAATAGACAAACTCAAAGTTTGTAATGATGAGCAACTTCTCTTGGAACTGCAGCAGATCAAAACATGGAACA	none	WT		6E
CSNK1A1KO-1	8-36	CSNK1A1_sgRNA_Ex2	GCTAGAATCTCAGAAGGCCAGGCATCCCCA[473bp]GCTGTACGAGAGCAAGCTCTATAAGATTCTTCAAGGTGGGGTT	473 bp insertion	frameshift		HUWE1_sgRNA_Ex2	CAGAGCCTTAATAGACAAACTCAAAGTTTGTAATGATGAGCAACTTCTCTTGGAACTGCAGCAGATCAAAACATGGAACA	none	WT		6E
CSNK1A1KO-1; HUWE1KO	8-15	CSNK1A1_sgRNA_Ex2	GCTAGAATCTCAGAAGGCCAGGCATCCCCA[473bp]GCTGTACGAGAGCAAGCTCTATAAGATTCTTCAAGGTGGGGTT	473 bp insertion	frameshift		HUWE1_sgRNA_Ex2	CAGAGNCTTAATAGACAAACTCAAAGTTTGTAATGATGAGCAACT--TCTTGGAACTGCAGCAGATCAAAACATGGAACA	2 bp deletion	frameshift		6E, 6-f.s.1E, 6-f.s.1F
CSNK1A1KO-1; HUWE1KO	8-16	CSNK1A1_sgRNA_Ex2	GCTAGAATCTCAGAAGGCCAGGCATCCCCA[473bp]GCTGTACGAGAGCAAGCTCTATAAGATTCTTCAAGGTGGGGTT	473 bp insertion	frameshift		HUWE1_sgRNA_Ex2	CAGAGNCTTAATAGACAAACTCAAAGTTTGTAATGATGAGCAACTTCTTCTTGGAACTGCAGCAGATCAAAACATGGAAC	1 bp insertion	frameshift		6E, 6F, 6G, 6H
CSNK1A1KO-1; HUWE1KO	8-20	CSNK1A1_sgRNA_Ex2	GCTAGAATCTCAGAAGGCCAGGCATCCCCA[473bp]GCTGTACGAGAGCAAGCTCTATAAGATTCTTCAAGGTGGGGTT	473 bp insertion	frameshift		HUWE1_sgRNA_Ex2	Undetermined			No PCR product	6E
CSNK1A1KO-1; HUWE1KO	8-21	CSNK1A1_sgRNA_Ex2	GCTAGAATCTCAGAAGGCCAGGCATCCCCA[473bp]GCTGTACGAGAGCAAGCTCTATAAGATTCTTCAAGGTGGGGTT	473 bp insertion	frameshift		HUWE1_sgRNA_Ex2	CAGAGNCTTAATAGACAAACTCAAAGTTTGTAATGATGAGCAA-----CTTGGAACTGCAGCAGATCAAAACATGGAACA	5 bp deletion	frameshift		6E
CSNK1A1KO-1; HUWE1KO	8-22	CSNK1A1_sgRNA_Ex2	GCTAGAATCTCAGAAGGCCAGGCATCCCCA[473bp]GCTGTACGAGAGCAAGCTCTATAAGATTCTTCAAGGTGGGGTT	473 bp insertion	frameshift		HUWE1_sgRNA_Ex2	CAGAGNCTTAATAGACAAACTCAAAGTTTGTAATGATGAGC------------------------------------...	213 bp deletion + 1 bp insertion	frameshift	PCR product is visibly smaller	6E
CSNK1A1KO-1; HUWE1KO	8-23	CSNK1A1_sgRNA_Ex2	GCTAGAATCTCAGAAGGCCAGGCATCCCCA[473bp]GCTGTACGAGAGCAAGCTCTATAAGATTCTTCAAGGTGGGGTT	473 bp insertion	frameshift		HUWE1_sgRNA_Ex2	CAGAGNCTTAATAGACAAACTCAAAGTTTGTAATGATGAGCAA-----CTTGGAACTGCAGCAGATCAAAACATGGAACA	5 bp deletion	frameshift		6E, 6-f.s.1E, 6-f.s.1F
Reference		CSNK1A1_sgRNA_Ex3	CGGTGGTATGGTCAGGAAAAAGACTACAATGTACTAGTCATGGATCTTCTGGGACCTAGCCTCGAAGACCTCTTCAATTT				HUWE1_sgRNA_Ex1	AATTGAAATCATGAAAGTAGACAGGACTAAACTGAAGAAGACACCTACTGAGGCTGTAAGTATCCAAAAGTTTACTTTGC
CSNK1A1KO-2	19-12	CSNK1A1_sgRNA_Ex3	CGGTGGTATGGTCAGGAAAAAGACTACAATGTACTAGTCAT------TCTGGGACCTAGCCTCGAAGACCTCTTCAATTT	6 bp deletion	2 amino acid deletion		HUWE1_sgRNA_Ex1	AATTGAAATCATGAAAGTAGACAGGACTAAACTGAAGAAGACACCTACTGAGGCTGTAAGTATCCAAAAGTTTACTTTGC	none	WT		6-f.s.1D
CSNK1A1KO-2	19-15	CSNK1A1_sgRNA_Ex3	CGGTGGTATGGTCAGGAAAAAGACTACAATGTACTAGTCAT------TCTGGGACCTAGCCTCGAAGACCTCTTCAATTT	6 bp deletion	2 amino acid deletion		HUWE1_sgRNA_Ex1	AATTGAAATCATGAAAGTAGACAGGACTAAACTGAAGAAGACACCTACTGAGGCTGTAAGTATCCAAAAGTTTACTTTGC	none	WT		6-f.s.1D
CSNK1A1KO-2	19-16	CSNK1A1_sgRNA_Ex3	CGGTGGTATGGTCAGGAAAAAGACTACAATGTACTAGTCAT------TCTGGGACCTAGCCTCGAAGACCTCTTCAATTT	6 bp deletion	2 amino acid deletion		HUWE1_sgRNA_Ex1	AATTGAAATCATGAAAGTAGACAGGACTAAACTGAAGAAGACACCTACTGAGGCTGTAAGTATCCAAAAGTTTACTTTGC	none	WT		6-f.s.1D
CSNK1A1KO-2	19-17	CSNK1A1_sgRNA_Ex3	CGGTGGTATGGTCAGGAAAAAGACTACAATGTACTAGTCAT------TCTGGGACCTAGCCTCGAAGACCTCTTCAATTT	6 bp deletion	2 amino acid deletion		HUWE1_sgRNA_Ex1	AATTGAAATCATGAAAGTAGACAGGACTAAACTGAAGAAGACACCTACTGAGGCTGTAAGTATCCAAAAGTTTACTTTGC	none	WT		6-f.s.1D
CSNK1A1KO-2	19-18	CSNK1A1_sgRNA_Ex3	CGGTGGTATGGTCAGGAAAAAGACTACAATGTACTAGTCAT------TCTGGGACCTAGCCTCGAAGACCTCTTCAATTT	6 bp deletion	2 amino acid deletion		HUWE1_sgRNA_Ex1	AATTGAAATCATGAAAGTAGACAGGACTAAACTGAAGAAGACACCTACTGAGGCTGTAAGTATCCAAAAGTTTACTTTGC	none	WT		6-f.s.1D
CSNK1A1KO-2; HUWE1KO	19-2	CSNK1A1_sgRNA_Ex3	CGGTGGTATGGTCAGGAAAAAGACTACAATGTACTAGTCAT------TCTGGGACCTAGCCTCGAAGACCTCTTCAATTT	6 bp deletion	2 amino acid deletion		HUWE1_sgRNA_Ex1	AATTGAAATCATGAAAGTAGACAGGACTAAA----------------CTGAGGCTGTAAGTATCCAAAAGTTTACTTTGC	16 bp deletion	frameshift		6-f.s.1D
CSNK1A1KO-2; HUWE1KO	19-3	CSNK1A1_sgRNA_Ex3	CGGTGGTATGGTCAGGAAAAAGACTACAATGTACTAGTCAT------TCTGGGACCTAGCCTCGAAGACCTCTTCAATTT	6 bp deletion	2 amino acid deletion		HUWE1_sgRNA_Ex1	AATTGAAATCATGAAAGTAGACAGGACTAAACTGAAGAAGACACCTA--GAGGCTGTAAGTATCCAAAAGTTTACTTTGC	2 bp deletion	frameshift		6-f.s.1D
CSNK1A1KO-2; HUWE1KO	19-4	CSNK1A1_sgRNA_Ex3	CGGTGGTATGGTCAGGAAAAAGACTACAATGTACTAGTCAT------TCTGGGACCTAGCCTCGAAGACCTCTTCAATTT	6 bp deletion	2 amino acid deletion		HUWE1_sgRNA_Ex1	AATTGAAATCATGAAAGTAGACAGGACTAAACTGAAGAAGACACA--CTGAGGCTGTAAGTATCCAAAAGTTTACTTTGC	3 bp deletion + 1 bp insertion	frameshift		6-f.s.1D
CSNK1A1KO-2; HUWE1KO	19-5	CSNK1A1_sgRNA_Ex3	CGGTGGTATGGTCAGGAAAAAGACTACAATGTACTAGTCAT------TCTGGGACCTAGCCTCGAAGACCTCTTCAATTT	6 bp deletion	2 amino acid deletion		HUWE1_sgRNA_Ex1	AATTGAAATCATGAAAGTAGACAGGACTAAACTGAA-------------GAGGCTGTAAGTATCCAAAAGTTTACTTTGC	13 bp deletion	frameshift		6-f.s.1D
CSNK1A1KO-2; HUWE1KO	19-7	CSNK1A1_sgRNA_Ex3	CGGTGGTATGGTCAGGAAAAAGACTACAATGTACTAGTCAT------TCTGGGACCTAGCCTCGAAGACCTCTTCAATTT	6 bp deletion	2 amino acid deletion		HUWE1_sgRNA_Ex1	AATTGAAATCATGAAAGTAGACAGGACTAAACTGAAGAAGACACCTA--GAGGCTGTAAGTATCCAAAAGTTTACTTTGC	2 bp deletion	frameshift		6-f.s.1D
CSNK1A1KO-2; HUWE1KO	19-10	CSNK1A1_sgRNA_Ex3	CGGTGGTATGGTCAGGAAAAAGACTACAATGTACTAGTCAT------TCTGGGACCTAGCCTCGAAGACCTCTTCAATTT	6 bp deletion	2 amino acid deletion		HUWE1_sgRNA_Ex1	AATTGAAATCATGAAAGTAGACAGGACTAAACTGAAGAAGACACCTA[43bp]CTGAGGCTGTAAGTATCCAAAAGTTTA	43 bp insertion	frameshift	PCR product is visibly larger	6-f.s.1D
CSNK1A1KO-2; HUWE1KO	19-11	CSNK1A1_sgRNA_Ex3	CGGTGGTATGGTCAGGAAAAAGACTACAATGTACTAGTCAT------TCTGGGACCTAGCCTCGAAGACCTCTTCAATTT	6 bp deletion	2 amino acid deletion		HUWE1_sgRNA_Ex1	AATTGAAATCATGAAAGTAGACAGGACTAAACTGAAGAAGACACCTAACTGAGGCTGTAAGTATCCAAAAGTTTACTTTG	1 bp insertion	frameshift		6-f.s.1D
CSNK1A1KO-2; HUWE1KO	19-13	CSNK1A1_sgRNA_Ex3	CGGTGGTATGGTCAGGAAAAAGACTACAATGTACTAGTCAT------TCTGGGACCTAGCCTCGAAGACCTCTTCAATTT	6 bp deletion	2 amino acid deletion		HUWE1_sgRNA_Ex1	AATTGAAATCATGAAAGTAGACAGGACTAAACTGAAGAAGACACCTAACTGAGGCTGTAAGTATCCAAAAGTTTACTTTG	1 bp insertion	frameshift		6-f.s.1D
Reference		CSNK1A1_sgRNA_Ex3	CGGTGGTATGGTCAGGAAAAAGACTACAATGTACTAGTCATGGATCTTCTGGGACCTAGCCTCGAAGACCTCTTCAATTT				HUWE1_sgRNA_Ex2	CAGAGCCTTAATAGACAAACTCAAAGTTTGTAATGATGAGCAACTTCTCTTGGAACTGCAGCAGATCAAAACATGGAACA
CSNK1A1KO-2	19-25	CSNK1A1_sgRNA_Ex3	CGGTGGTATGGTCAGGAAAAAGACTACAATGTACTAGTCAT------TCTGGGACCTAGCCTCGAAGACCTCTTCAATTT	6 bp deletion	2 amino acid deletion		HUWE1_sgRNA_Ex2	CAGAGCCTTAATAGACAAACTCAAAGTTTGTAATGATGAGCAACTTCTCTTGGAACTGCAGCAGATCAAAACATGGAACA	none	WT		6-f.s.1D
CSNK1A1KO-2	19-33	CSNK1A1_sgRNA_Ex3	CGGTGGTATGGTCAGGAAAAAGACTACAATGTACTAGTCAT------TCTGGGACCTAGCCTCGAAGACCTCTTCAATTT	6 bp deletion	2 amino acid deletion		HUWE1_sgRNA_Ex2	CAGAGCCTTAATAGACAAACTCAAAGTTTGTAATGATGAGCAACTTCTCTTGGAACTGCAGCAGATCAAAACATGGAACA	none	WT		6-f.s.1D
CSNK1A1KO-2	19-36	CSNK1A1_sgRNA_Ex3	CGGTGGTATGGTCAGGAAAAAGACTACAATGTACTAGTCAT------TCTGGGACCTAGCCTCGAAGACCTCTTCAATTT	6 bp deletion	2 amino acid deletion		HUWE1_sgRNA_Ex2	CAGAGCCTTAATAGACAAACTCAAAGTTTGTAATGATGAGCAACTTCTCTTGGAACTGCAGCAGATCAAAACATGGAACA	none	WT		6-f.s.1D
CSNK1A1KO-2; HUWE1KO	19-23	CSNK1A1_sgRNA_Ex3	CGGTGGTATGGTCAGGAAAAAGACTACAATGTACTAGTCAT------TCTGGGACCTAGCCTCGAAGACCTCTTCAATTT	6 bp deletion	2 amino acid deletion		HUWE1_sgRNA_Ex2	CAGAGCCTTAATAGACAAACTCAAAGTTTGTAATGATGAGCAACTTCTTCTTGGAACTGCAGCAGATCAAAACATGGAAC	1 bp insertion	frameshift		6-f.s.1D
CSNK1A1KO-2; HUWE1KO	19-24	CSNK1A1_sgRNA_Ex3	CGGTGGTATGGTCAGGAAAAAGACTACAATGTACTAGTCAT------TCTGGGACCTAGCCTCGAAGACCTCTTCAATTT	6 bp deletion	2 amino acid deletion		HUWE1_sgRNA_Ex2	CAGAGCCTTAATAGACAAACTCAAAGTTTGTAATGATGAGCAACT--TCTTGGAACTGCAGCAGATCAAAACATGGAACA	2 bp deletion	frameshift		6-f.s.1D
CSNK1A1KO-2; HUWE1KO	19-29	CSNK1A1_sgRNA_Ex3	CGGTGGTATGGTCAGGAAAAAGACTACAATGTACTAGTCAT------TCTGGGACCTAGCCTCGAAGACCTCTTCAATTT	6 bp deletion	2 amino acid deletion		HUWE1_sgRNA_Ex2	CAGAGCCTTAATAGACAAACTCAAAGTTTGTAATGATGAGCAA-----CTTGGAACTGCAGCAGATCAAAACATGGAACA	5 bp deletion	frameshift		6-f.s.1D
CSNK1A1KO-2; HUWE1KO	19-31	CSNK1A1_sgRNA_Ex3	CGGTGGTATGGTCAGGAAAAAGACTACAATGTACTAGTCAT------TCTGGGACCTAGCCTCGAAGACCTCTTCAATTT	6 bp deletion	2 amino acid deletion		HUWE1_sgRNA_Ex2	CAGAGCCTTAATAGACAAACTCAAAGTTTGTAATGATGAGCAACT--TCTTGGAACTGCAGCAGATCAAAACATGGAACA	2 bp deletion	frameshift		6-f.s.1D
CSNK1A1KO-2; HUWE1KO	19-34	CSNK1A1_sgRNA_Ex3	CGGTGGTATGGTCAGGAAAAAGACTACAATGTACTAGTCAT------TCTGGGACCTAGCCTCGAAGACCTCTTCAATTT	6 bp deletion	2 amino acid deletion		HUWE1_sgRNA_Ex2	CAGAGCCTTAATAGACAAACTCAAAGTTTGTAATGATGAGCAACTTCCTCTTGGAACTGCAGCAGATCAAAACATGGAAC	1 bp insertion	frameshift		6-f.s.1D
Reference		APC_sgRNA_Ex5	ATGTCCCTCCGTTCTTATGGAAGCCGGGAAGGATCTGTATCAAGCCGTTCTGGAGAGTGCAGTCCTGTTCCTATGGGTTC				HUWE1_sgRNA_Ex1	AATTGAAATCATGAAAGTAGACAGGACTAAACTGAAGAAGACACCTACTGAGGCTGTAAGTATCCAAAAGTTTACTTTGC
APCKO-1	6-3	APC_sgRNA_Ex5	...---------------------------------------------TCTGGAGAGTGCAGTCCTGTTCCTATGGGTTC	155 bp deletion, 5bp insertion	frameshift		HUWE1_sgRNA_Ex1	AATTGAAATCATGAAAGTAGACAGGACTAAACTGAAGAAGACACCTACTGAGGCTGTAAGTATCCAAAAGTTTACTTTGC	none	WT		6I
APCKO-1	6-4	APC_sgRNA_Ex5	...---------------------------------------------TCTGGAGAGTGCAGTCCTGTTCCTATGGGTTC	155 bp deletion, 5bp insertion	frameshift		HUWE1_sgRNA_Ex1	AATTGAAATCATGAAAGTAGACAGGACTAAACTGAAGAAGACACCTACTGAGGCTGTAAGTATCCAAAAGTTTACTTTGC	none	WT		6I
APCKO-1	6-5	APC_sgRNA_Ex5	...---------------------------------------------TCTGGAGAGTGCAGTCCTGTTCCTATGGGTTC	155 bp deletion, 5bp insertion	frameshift		HUWE1_sgRNA_Ex1	AATTGAAATCATGAAAGTAGACAGGACTAAACTGAAGAAGACACCTACTGAGGCTGTAAGTATCCAAAAGTTTACTTTGC	none	WT		6I
APCKO-1	6-6	APC_sgRNA_Ex5	...---------------------------------------------TCTGGAGAGTGCAGTCCTGTTCCTATGGGTTC	155 bp deletion, 5bp insertion	frameshift		HUWE1_sgRNA_Ex1	AATTGAAATCATGAAAGTAGACAGGACTAAACTGAAGAAGACACCTACTGAGGCTGTAAGTATCCAAAAGTTTACTTTGC	none	WT		6I
APCKO-1	6-8	APC_sgRNA_Ex5	...---------------------------------------------TCTGGAGAGTGCAGTCCTGTTCCTATGGGTTC	155 bp deletion, 5bp insertion	frameshift		HUWE1_sgRNA_Ex1	AATTGAAATCATGAAAGTAGACAGGACTAAACTGAAGAAGACACCTACTGAGGCTGTAAGTATCCAAAAGTTTACTTTGC	none	WT		6I
APCKO-1	6-9	APC_sgRNA_Ex5	...---------------------------------------------TCTGGAGAGTGCAGTCCTGTTCCTATGGGTTC	155 bp deletion, 5bp insertion	frameshift		HUWE1_sgRNA_Ex1	AATTGAAATCATGAAAGTAGACAGGACTAAACTGAAGAAGACACCTACTGAGGCTGTAAGTATCCAAAAGTTTACTTTGC	none	WT		6I
APCKO-1	6-10	APC_sgRNA_Ex5	...---------------------------------------------TCTGGAGAGTGCAGTCCTGTTCCTATGGGTTC	155 bp deletion, 5bp insertion	frameshift		HUWE1_sgRNA_Ex1	AATTGAAATCATGAAAGTAGACAGGACTAAACTGAAGAAGACACCTACTGAGGCTGTAAGTATCCAAAAGTTTACTTTGC	none	WT		6I
APCKO-1	6-11	APC_sgRNA_Ex5	...---------------------------------------------TCTGGAGAGTGCAGTCCTGTTCCTATGGGTTC	155 bp deletion, 5bp insertion	frameshift		HUWE1_sgRNA_Ex1	AATTGAAATCATGAAAGTAGACAGGACTAAACTGAAGAAGACACCTACTGAGGCTGTAAGTATCCAAAAGTTTACTTTGC	none	WT		6I
APCKO-1	6-12	APC_sgRNA_Ex5	...---------------------------------------------TCTGGAGAGTGCAGTCCTGTTCCTATGGGTTC	155 bp deletion, 5bp insertion	frameshift		HUWE1_sgRNA_Ex1	AATTGAAATCATGAAAGTAGACAGGACTAAACTGAAGAAGACACCTACTGAGGCTGTAAGTATCCAAAAGTTTACTTTGC	none	WT		6I
APCKO-1	6-14	APC_sgRNA_Ex5	...---------------------------------------------TCTGGAGAGTGCAGTCCTGTTCCTATGGGTTC	155 bp deletion, 5bp insertion	frameshift		HUWE1_sgRNA_Ex1	AATTGAAATCATGAAAGTAGACAGGACTAAACTGAAGAAGACACCTACTGAGGCTGTAAGTATCCAAAAGTTTACTTTGC	none	WT		6I
APCKO-1	6-17	APC_sgRNA_Ex5	...---------------------------------------------TCTGGAGAGTGCAGTCCTGTTCCTATGGGTTC	155 bp deletion, 5bp insertion	frameshift		HUWE1_sgRNA_Ex1	AATTGAAATCATGAAAGTAGACAGGACTAAACTGAAGAAGACACCTACTGAGGCTGTAAGTATCCAAAAGTTTACTTTGC	none	WT		6I
APCKO-1	6-19	APC_sgRNA_Ex5	...---------------------------------------------TCTGGAGAGTGCAGTCCTGTTCCTATGGGTTC	155 bp deletion, 5bp insertion	frameshift		HUWE1_sgRNA_Ex1	AATTGAAATCATGAAAGTAGACAGGACTAAACTGAAGAAGACACCTACTGAGGCTGTAAGTATCCAAAAGTTTACTTTGC	none	WT		6I
APCKO-1	6-22	APC_sgRNA_Ex5	...---------------------------------------------TCTGGAGAGTGCAGTCCTGTTCCTATGGGTTC	155 bp deletion, 5bp insertion	frameshift		HUWE1_sgRNA_Ex1	AATTGAAATCATGAAAGTAGACAGGACTAAACTGAAGAAGACACCTACTGAGGCTGTAAGTATCCAAAAGTTTACTTTGC	none	WT		6I
APCKO-1	6-23	APC_sgRNA_Ex5	...---------------------------------------------TCTGGAGAGTGCAGTCCTGTTCCTATGGGTTC	155 bp deletion, 5bp insertion	frameshift		HUWE1_sgRNA_Ex1	AATTGAAATCATGAAAGTAGACAGGACTAAACTGAAGAAGACACCTACTGAGGCTGTAAGTATCCAAAAGTTTACTTTGC	none	WT		6I
APCKO-1; HUWE1KO	6-1	APC_sgRNA_Ex5	...---------------------------------------------TCTGGAGAGTGCAGTCCTGTTCCTATGGGTTC	155 bp deletion, 5bp insertion	frameshift		HUWE1_sgRNA_Ex1	AATTGAAATCATGAAAGTAGACAGGACTAAACTGAAGAAGACACCTACACTGAGGCTGTAAGTATCCAAAAGTTTACTTT	2 bp insertion	frameshift
APCKO-1; HUWE1KO	6-2	APC_sgRNA_Ex5	...---------------------------------------------TCTGGAGAGTGCAGTCCTGTTCCTATGGGTTC	155 bp deletion, 5bp insertion	frameshift		HUWE1_sgRNA_Ex1	AATTGAAATCATGAAAGTAGACAGGACTAAACTGAAGAAGACACCTTACTGAGGCTGTAAGTATCCAAAAGTTTACTTTG	1 bp deletion + 2 bp insertion	frameshift
APCKO-1; HUWE1KO	6-13	APC_sgRNA_Ex5	...---------------------------------------------TCTGGAGAGTGCAGTCCTGTTCCTATGGGTTC	155 bp deletion, 5bp insertion	frameshift		HUWE1_sgRNA_Ex1	AATTGAAATCATGAAAGTAGACAGGACTAAACTGAAGAAGACACCTAACTGAGGCTGTAAGTATCCAAAAGTTTACTTTG	1 bp insertion	frameshift
APCKO-1; HUWE1KO	6-15	APC_sgRNA_Ex5	...---------------------------------------------TCTGGAGAGTGCAGTCCTGTTCCTATGGGTTC	155 bp deletion, 5bp insertion	frameshift		HUWE1_sgRNA_Ex1	AATTGAAATCATGAAAGTAGACAGGACTAAACTGAAGAAGACACCTA------------------------------...	143 bp deletion	frameshift	PCR product is visibly smaller
APCKO-1; HUWE1KO	6-16	APC_sgRNA_Ex5	...---------------------------------------------TCTGGAGAGTGCAGTCCTGTTCCTATGGGTTC	155 bp deletion, 5bp insertion	frameshift		HUWE1_sgRNA_Ex1	AATTGAAATCATGAAAGTAGACAGGACTAAACTGAAGAAGACACCTAACTGAGGCTGTAAGTATCCAAAAGTTTACTTTG	1 bp insertion	frameshift
APCKO-1; HUWE1KO	6-18	APC_sgRNA_Ex5	...---------------------------------------------TCTGGAGAGTGCAGTCCTGTTCCTATGGGTTC	155 bp deletion, 5bp insertion	frameshift		HUWE1_sgRNA_Ex1	AATTGAAATCATGAAAGTAGACAGGACTAAACTGAAGAAGACACCTA[164bp]CTGAGGCTGTAAGTATCCAAAAGTTT	164 bp insertion	frameshift	PCR product is visibly larger
APCKO-1; HUWE1KO	6-20	APC_sgRNA_Ex5	...---------------------------------------------TCTGGAGAGTGCAGTCCTGTTCCTATGGGTTC	155 bp deletion, 5bp insertion	frameshift		HUWE1_sgRNA_Ex1	AATTGAAATCATGAAAGTAGACAGGACTAAACTGAAGAAGACACCT-CTGAGGCTGTAAGTATCCAAAAGTTTACTTTGC	1 bp deletion	frameshift
APCKO-1; HUWE1KO	6-24	APC_sgRNA_Ex5	...---------------------------------------------TCTGGAGAGTGCAGTCCTGTTCCTATGGGTTC	155 bp deletion, 5bp insertion	frameshift		HUWE1_sgRNA_Ex1	Partial alignment	Large insertion	frameshift	PCR product is visibly larger
Reference		APC_sgRNA_Ex5	ATGTCCCTCCGTTCTTATGGAAGCCGGGAAGGATCTGTATCAAGCCGTTCTGGAGAGTGCAGTCCTGTTCCTATGGGTTC				HUWE1_sgRNA_Ex2	CAGAGCCTTAATAGACAAACTCAAAGTTTGTAATGATGAGCAACTTCTCTTGGAACTGCAGCAGATCAAAACATGGAACA
APCKO-1	6-34	APC_sgRNA_Ex5	...---------------------------------------------TCTGGAGAGTGCAGTCCTGTTCCTATGGGTTC	155 bp deletion, 5bp insertion	frameshift		HUWE1_sgRNA_Ex2	CAGAGCCTTAATAGACAAACTCAAAGTTTGTAATGATGAGCAACTTCTCTTGGAACTGCAGCAGATCAAAACATGGAACA	none	WT		6I
APCKO-1	6-36	APC_sgRNA_Ex5	...---------------------------------------------TCTGGAGAGTGCAGTCCTGTTCCTATGGGTTC	155 bp deletion, 5bp insertion	frameshift		HUWE1_sgRNA_Ex2	CAGAGCCTTAATAGACAAACTCAAAGTTTGTAATGATGAGCAACTTCTCTTGGAACTGCAGCAGATCAAAACATGGAACA	none	WT		6I
APCKO-1	6-39	APC_sgRNA_Ex5	...---------------------------------------------TCTGGAGAGTGCAGTCCTGTTCCTATGGGTTC	155 bp deletion, 5bp insertion	frameshift		HUWE1_sgRNA_Ex2	CAGAGCCTTAATAGACAAACTCAAAGTTTGTAATGATGAGCAACTTCTCTTGGAACTGCAGCAGATCAAAACATGGAACA	none	WT		6I
APCKO-1	6-41	APC_sgRNA_Ex5	...---------------------------------------------TCTGGAGAGTGCAGTCCTGTTCCTATGGGTTC	155 bp deletion, 5bp insertion	frameshift		HUWE1_sgRNA_Ex2	CAGAGCCTTAATAGACAAACTCAAAGTTTGTAATGATGAGCAACTTCTCTTGGAACTGCAGCAGATCAAAACATGGAACA	none	WT		6I
APCKO-1	6-42	APC_sgRNA_Ex5	...---------------------------------------------TCTGGAGAGTGCAGTCCTGTTCCTATGGGTTC	155 bp deletion, 5bp insertion	frameshift		HUWE1_sgRNA_Ex2	CAGAGCCTTAATAGACAAACTCAAAGTTTGTAATGATGAGCAACTTCTCTTGGAACTGCAGCAGATCAAAACATGGAACA	none	WT		6I
APCKO-1	6-45	APC_sgRNA_Ex5	...---------------------------------------------TCTGGAGAGTGCAGTCCTGTTCCTATGGGTTC	155 bp deletion, 5bp insertion	frameshift		HUWE1_sgRNA_Ex2	CAGAGCCTTAATAGACAAACTCAAAGTTTGTAATGATGAGCAACTTCTCTTGGAACTGCAGCAGATCAAAACATGGAACA	none	WT		6I
APCKO-1	6-46	APC_sgRNA_Ex5	...---------------------------------------------TCTGGAGAGTGCAGTCCTGTTCCTATGGGTTC	155 bp deletion, 5bp insertion	frameshift		HUWE1_sgRNA_Ex2	CAGAGCCTTAATAGACAAACTCAAAGTTTGTAATGATGAGCAACTTCTCTTGGAACTGCAGCAGATCAAAACATGGAACA	none	WT		6I
APCKO-1	6-47	APC_sgRNA_Ex5	...---------------------------------------------TCTGGAGAGTGCAGTCCTGTTCCTATGGGTTC	155 bp deletion, 5bp insertion	frameshift		HUWE1_sgRNA_Ex2	CAGAGCCTTAATAGACAAACTCAAAGTTTGTAATGATGAGCAACTTCTCTTGGAACTGCAGCAGATCAAAACATGGAACA	none	WT		6I
APCKO-1	6-48	APC_sgRNA_Ex5	...---------------------------------------------TCTGGAGAGTGCAGTCCTGTTCCTATGGGTTC	155 bp deletion, 5bp insertion	frameshift		HUWE1_sgRNA_Ex2	CAGAGCCTTAATAGACAAACTCAAAGTTTGTAATGATGAGCAACTTCTCTTGGAACTGCAGCAGATCAAAACATGGAACA	none	WT		6I
APCKO-1; HUWE1KO	6-25	APC_sgRNA_Ex5	...---------------------------------------------TCTGGAGAGTGCAGTCCTGTTCCTATGGGTTC	155 bp deletion, 5bp insertion	frameshift		HUWE1_sgRNA_Ex2	CAGAGCCTTAATAGACAAACTCAAAGTTTGTAATGATGAGCAA-----CTTGGAACTGCAGCAGATCAAAACATGGAACA	5 bp deletion	frameshift		6I
APCKO-1; HUWE1KO	6-26	APC_sgRNA_Ex5	...---------------------------------------------TCTGGAGAGTGCAGTCCTGTTCCTATGGGTTC	155 bp deletion, 5bp insertion	frameshift		HUWE1_sgRNA_Ex2	CAGAGCCTTAATAGACAAACTCAAAGTTTGTAATGATGAGCAACTTC-----GAACTGCAGCAGATCAAAACATGGAACA	5 bp deletion	frameshift		6I
APCKO-1; HUWE1KO	6-28	APC_sgRNA_Ex5	...---------------------------------------------TCTGGAGAGTGCAGTCCTGTTCCTATGGGTTC	155 bp deletion, 5bp insertion	frameshift		HUWE1_sgRNA_Ex2	CAGAGCCTTAATAGACAAACTCAAAGTTTGTAATGATGAGCAACT--TCTTGGAACTGCAGCAGATCAAAACATGGAACA	2 bp deletion	frameshift		6I
APCKO-1; HUWE1KO	6-30	APC_sgRNA_Ex5	...---------------------------------------------TCTGGAGAGTGCAGTCCTGTTCCTATGGGTTC	155 bp deletion, 5bp insertion	frameshift		HUWE1_sgRNA_Ex2	CAGAGCCTTAATAGACAAACTCAAAGTTTGTAAAGTTTGTAA--------TGGAACTGCAGCAGATCAAAACATGGAACA	17 bp deletion + 9 bp insertion	frameshift		6I
APCKO-1; HUWE1KO	6-32	APC_sgRNA_Ex5	...---------------------------------------------TCTGGAGAGTGCAGTCCTGTTCCTATGGGTTC	155 bp deletion, 5bp insertion	frameshift		HUWE1_sgRNA_Ex2	CAGAGCCTTAATAGACAAACTCAAAGTTTGTAATGATGAGCAACTTTTCTTGGAACTGCAGCAGATCAAAACATGGAACA	1 pb substitution	Leu to Phe substitution		6I
APCKO-1; HUWE1KO	6-35	APC_sgRNA_Ex5	...---------------------------------------------TCTGGAGAGTGCAGTCCTGTTCCTATGGGTTC	155 bp deletion, 5bp insertion	frameshift		HUWE1_sgRNA_Ex2	CAGAGCCTTAATAGACAAACTCAAAGTTTGTAATGATGAGCAA----TCTTGGAACTGCAGCAGATCAAAACATGGAACA	4 bp deletion	frameshift		6I
APCKO-1; HUWE1KO	6-37	APC_sgRNA_Ex5	...---------------------------------------------TCTGGAGAGTGCAGTCCTGTTCCTATGGGTTC	155 bp deletion, 5bp insertion	frameshift		HUWE1_sgRNA_Ex2	CNGAGCCTTAATAGACAAACTCAAAGTTTGTAATGATGAGCAA-----CTTGGAACTGCAGCAGATCAAAACATGGAACA	5 bp deletion	frameshift		6I
APCKO-1; HUWE1KO	6-38	APC_sgRNA_Ex5	...---------------------------------------------TCTGGAGAGTGCAGTCCTGTTCCTATGGGTTC	155 bp deletion, 5bp insertion	frameshift		HUWE1_sgRNA_Ex2	Partial alignment	Large insertion	frameshift	PCR product is visibly larger	6I
APCKO-1; HUWE1KO	6-40	APC_sgRNA_Ex5	...---------------------------------------------TCTGGAGAGTGCAGTCCTGTTCCTATGGGTTC	155 bp deletion, 5bp insertion	frameshift		HUWE1_sgRNA_Ex2	CANAGCCTTAATAGACAAACTCAAAGTTTGTAATGATGAGCAA-----CTTGGAACTGCAGCAGATCAAAACATGGAACA	5 bp deletion	frameshift		6I
APCKO-1; HUWE1KO	6-43	APC_sgRNA_Ex5	...---------------------------------------------TCTGGAGAGTGCAGTCCTGTTCCTATGGGTTC	155 bp deletion, 5bp insertion	frameshift		HUWE1_sgRNA_Ex2	CAGAGCCTTAATAGACAAACTCAAAGTTTGTAATGATGAGCAACTTCTTCTTGGAACTGCAGCAGATCAAAACATGGAAC	1 bp insertion	frameshift		6I
APCKO-1; HUWE1KO	6-44	APC_sgRNA_Ex5	...---------------------------------------------TCTGGAGAGTGCAGTCCTGTTCCTATGGGTTC	155 bp deletion, 5bp insertion	frameshift		HUWE1_sgRNA_Ex2	CAGAGCCTTAATAGACAAACTCAAAGTTTGTAATGATGAGCAACT--TCTTGGAACTGCAGCAGATCAAAACATGGAACA	2 bp deletion	frameshift		6I
