# Supplementary material for: Comparative genetic screens in human cells reveal new regulatory mechanisms in WNT signaling
Source: eLife. 2016 Dec 20;5:e21459. doi: 10.7554/eLife.21459 (PMC5257257; doi:10.7554/eLife.21459)
Supplement: Supplementary file 3. — Genes used to generate the heat map (Figure 4B) comparing the two WNT positive regulator screens (Figure 1E and F) and the low WNT + RSPO screen (Figure 4A) are shown in the first spreadsheet, and those used to generate the heat map (Figure 5D) comparing the WNT positive regulator, low stringency screen (Figure 1E) and the APC and CSNK1A1 suppressor screens (Figure 5B and C) are shown in the second spreadsheet. Genes with an FDR-corrected p-value<10−4 in at least one of the three screens included in each comparison are shown, and the FDR-corrected p-value and IGTIOB score for each gene in each screen is indicated. Genes are shown in the same order as in the heat maps, clustered based on their IGTIOB scores (see Materials and methods for details). DOI: http://dx.doi.org/10.7554/eLife.21459.020 [file elife-21459-supp3.xlsx]

## Sheet: WNT high & low str., WNT + RSPO
Screen:	WNT (high str.)		WNT (low str.)		Low WNT + RSPO
Gene	FDR-corrected p-value	IGTIOB score	FDR-corrected p-value	IGTIOB score	FDR-corrected p-value	IGTIOB score
LGR4	0.957215	1.79185	1	-5.95086	1.77e-67	21.0792
PIGL	0.984387	0	1	-1.84242	2.76e-22	16.8594
PIGP	0.853121	-1.72586	1	0	1.88e-21	15.4638
WDR20	0.759904	5.57918	0.366008	2.25518	5.47e-21	15.8154
KEAP1	0.614115	5.52277	0.101878	5.17979	6.71e-15	14.1793
MLL	4.13e-07	5.90776	0.245866	2.50133	2.91e-13	9.83939
PIGS	0.759904	1.04811	0.984662	3.46574	1.06e-14	11.8146
RHOA	0.718262	2.77259	0.0678349	4.55836	8.25e-15	11.5807
CNOT3	0.00472389	1.85904	0.0137679	7.27524	1.25e-29	10.6727
PIGU	0.876823	0	1	1.33032	1.81e-08	10.5999
MPDU1	0.876823	0.775464	0.984662	2.36715	4.63e-05	10.1748
PIGX	0.759904	1.04811	1	1.99574	2.42e-06	7.60221
SFRS1	0.0333675	4.55836	0.0137679	-3.09325	3.28e-12	8.80807
GPC4	0.975924	-1.03133	1	0.411784	1.92e-05	6.58977
PIGB	0.951843	-0.693147	1	0	1.81e-05	5.90776
PIGT		0	1	-0.693147	2.47e-05	4.76971
HSP90B1	4.09e-08	9.49144	0.928592	3.04385	0.134115	3.737
SMARCA4	1.65e-05	11.3875	1	1.0006	0.450259	5.1713
MECOM	0.38692	8.11466	8.35e-09	6.17139	0.0911254	6.30603
SETDB1	7.31e-05	10.8875	0.0060183	5.97126	0.36949	5.22378
RNF146	0.00149981	6.96504	0.0220236	7.75018	1.8e-05	7.64902
FZD5	0.942865	0	1	-0.693147	7.24e-11	-4.63163
NEUROG2	2.15e-06	0.693147	0.00116578	-1.99574	6.28e-05	0
DPM3	0.759904	0	0.779189	0	3.68e-08	-1.04811
MALAT1	0.0100936	0	5.57e-05	0	9.07e-05	0
ERF	0.873871	-0.583143	0.084821	0	5.75e-10	1.51388
GPAA1	0.853121	0	1	0	7.08e-10	2.69027
SETD1B	7.31e-13	2.39881	1.88e-18	2.50743	3.3e-11	1.84242
SPCS1	6.44e-05	2.18616	0.00815579	3.44133	0.765507	1.74126
TFAP4	1.52e-48	3.70391	8.94e-20	1.27107	1.46e-29	3.57743
HNRNPD	0.759904	5.22378	5.78e-05	6.10925	1.77e-05	2.2847
NSD1	0.67747	3.46574	2.98e-07	9.56917	0.826654	-2.83249
BRD9	0.555	0.96441	1.32e-05	14.2548	0.000259312	4.49707
TRIP12	0.0343572	7.27524	4.07e-09	14.4683	0.000110409	4.34173
TSC1	0.38692	6.27189	5.39e-06	18.3966	0.597292	4.63163
DEPDC5	5.75e-10	15.9962	5.4e-10	11.5396	0.297663	6.96504
NPRL3	2.58e-06	12.2542	0.00116578	16.274	0.000194493	9.28004
CTNNB1	8.88e-19	13.2465	8.4e-05	9.73517	7.07e-23	13.5857
AXIN2	1.54e-25	17.8334	1.45e-15	14.9464	1.89e-54	13.2902
CNOT2	7.01e-06	10.8875	1.28e-10	15.6131	1.82e-57	26.1997
DOT1L	8.47e-22	18.3419	4.4e-14	14.5967	5.75e-38	23.0234
LRP6	6.56e-99	29.97	8.43e-37	25.5341	1.89e-54	21.0943

## Sheet: WNT, APC suppr., CSNK1A1 suppr.
Screen:	WNT		APC suppressor		CSNK1A1 suppressor
Gene	FDR-corrected p-value	IGTIOB score	FDR-corrected p-value	IGTIOB score	FDR-corrected p-value	IGTIOB score
CTNNB1	8.4e-05	9.73517	5.43e-104	28.8986	4.07e-86	24.7704
CREBBP	0.000357526	18.3419	2.14e-36	26.935	1.39e-72	26.8257
CNOT2	1.28e-10	15.6131	0.458629	7.27524	3.42e-53	30.9341
ILF3	0.000627199	10.2708	0.443966	6.40619	1.21e-36	23.7634
TRIP12	4.07e-09	14.4683	0.0124814	6.26944	9.86e-16	13.348
RAD54L2	0.00727014	7.87613	1.53e-05	12.1248	1.72e-05	12.8515
CHD8	0.708205	7.60221	0.0887511	9.35468	6.08e-06	11.3595
ZCCHC14	0.0220236	5.94842	1.77e-06	5.48894	1.89e-06	9.21034
HNRNPD	5.78e-05	6.10925	0.0519688	4.69216	0.000446471	8.74088
ZNF280C	1	5.4384	0.994801	3.91121	1.66e-05	14.1715
CNOT3	0.0137679	7.27524	0.508218	3.04385	5.29e-30	14.1827
DDX6	1	5.34233		0	9.83e-05	11.3875
HUWE1	0.7645	5.71205	1	-3.4809	1.06e-56	22.36
SMARCE1	1	0	1	-0.894632	1.32e-14	17.1231
TRPS1	1	0	0.994801	-0.611549	2.76e-12	13.9186
ZNF236	1	-0.831229	0.000113151	7.84366	1.18e-08	14.9782
XPO6	1	1.37063	0.994801	2.40049	1.23e-07	12.2666
UBE2L3	1	1.84242	1	1.60669	2.95e-05	9.05405
MSI2	1	-0.393816	0.994801	3.84971	4.5e-09	10.1445
SMARCC1	1	-5.82305	1	-1.27653	2.38e-05	10.9874
RPRD2	1	-3.8505	1	-3.08279	1.2e-09	11.0999
FAM199X	1	-1.04811		0	2.53e-05	8.9083
LRP6	8.43e-37	25.5341	1	2.67236	1	0
TSC1	5.39e-06	18.3966	0.294956	8.30657		0
AXIN2	1.45e-15	14.9464	1	-6.95587	0.938491	-1.99574
DEPDC5	5.4e-10	11.5396	0.994801	1.84242	0.887986	-1.72586
BRD9	1.32e-05	14.2548	1	0	0.0551867	2.18616
DOT1L	4.4e-14	14.5967	0.994801	0.439576	0.166953	7.60622
ARID1A	0.0678349	9.83939	0.511111	2.83249	1.18e-10	7.90965
NSD1	2.98e-07	9.56917	0.994801	-1.08862	3.56e-11	6.01876
MECOM	8.35e-09	6.17139	0.994801	1.14956	1	1.33032
KCTD5	0.00116578	3.7216	0.246283	0.894632	2.53e-05	0.894632
SETD1B	1.88e-18	2.50743	1.31e-17	2.2173	0.00128959	3.01739
MSI1	1	-1.50218	0.994801	1.60669	1.57e-05	1.73166
TFAP4	8.94e-20	1.27107	3.15e-11	0.528307	1.95e-05	-3.08059
PARK2	1	0	1	1.35966	1.07e-05	-1.62244
MALAT1	5.57e-05	0	7.7e-05	0	0.239276	0
C17orf71	0.779189	0	2.14e-08	0.693147	1	0
CSDE1	0.928592	0.775464	3.17e-41	26.7334	0.987932	2.07944
SERBP1	1	0.646333	1.02e-48	27.6162	5.86e-10	15.9962
PBRM1	1	-10.0366	1.19e-11	14.1403	1.96e-32	15.6022
C11orf30	1	-0.864746	1.34e-18	13.3047	6.19e-10	7.067
PHF12	1	-0.831229	1.19e-07	9.34241	0.705487	7.75018
YBX1		0	1.63e-12	15.2714		0
C19orf61	1	0.96441	7.31e-11	14.2032	0.987932	1.04811
RLIM	0.699642	4.85874	3.29e-05	11.7266	0.887986	2.33341
CASC3	1	2.07944	1.37e-08	10.2085	1	-1.03133
STRAP	0.567619	5.90776	2.5e-05	8.77076		0
C6orf62		0	4.32e-08	8.8388		0
ADRM1		0	1.28e-08	6.27189	0.979502	0
SMG1	0.112901	1.04811	2.85e-10	6.58977	0.887986	-3.04385
