# Supplementary material for: Comparative genetic screens in human cells reveal new regulatory mechanisms in WNT signaling
Source: eLife. 2016 Dec 20;5:e21459. doi: 10.7554/eLife.21459 (PMC5257257; doi:10.7554/eLife.21459)
Supplement: Supplementary file 4. — The names and sequences of pairs of oligonucleotides encoding sgRNAs (which were cloned into pX330) are shown in columns A and B, respectively. The names and sequences of pairs of primers used to amplify corresponding genomic regions flanking sgRNA target sites are shown in columns C and D, respectively. The names and sequences of single primers used to sequence the amplified target sites are shown in columns E and F, respectively. DOI: http://dx.doi.org/10.7554/eLife.21459.021 [file elife-21459-supp4.xlsx]

## Sheet: Sheet1
CRISPR guide oligonucleotides	Sequence (5'-3')	Primers for amplifying genomic sequence conataining target site	Sequence (5'-3')	Primer for sequencing target site	Sequence (5'-3')
TFAP4_sgRNA_Ex6_II_A	CAC CGC CAC ATC AAT GTC GTC ACC A	TFAP4_Ex6_For	GCC CTG TGC TAG GGT TTT CA	TFAP4_Ex6_Seq	CTA AAG AGC CTG TTC CCG GA
TFAP4_sgRNA_Ex6_II_B	AAA CTG GTG ACG ACA TTG ATG TGG C	TFAP4_Ex6_Rev	GAA CTC TGT AAC CAG GGG GC
AXIN2_sgRNA_Ex11_A	CAC CGT CAG CAA AAA GGG AAA TTA T	AXIN2_Ex10/11_For	AGC ACT CTC CAA TCC AGG TG	AXIN2_Ex10/11_Seq	TGC CTG ACT CTG GGA TGT G
AXIN2_sgRNA_Ex11_B	AAA CAT AAT TTC CCT TTT TGC TGA C	AXIN2_Ex10/11_Rev	TAA AGC CTC TGC AGT GTG GC
AXIN2_sgRNA_Ex10_A	CAC CGT GGA CAC CTG CCA GTT TCT T	AXIN2_Ex10/11_For	AGC ACT CTC CAA TCC AGG TG	AXIN2_Ex10/11_Seq	TGC CTG ACT CTG GGA TGT G
AXIN2_sgRNA_Ex10_B	AAA CAA GAA ACT GGC AGG TGT CCA C	AXIN2_Ex10/11_Rev	TAA AGC CTC TGC AGT GTG GC
AXIN2_sgRNA_Ex1_A	CAC CGA CAC CAG GCG GAA CGA AGA T	AXIN2_Ex1_For	ATG AGC ACC TCG CAG ATA GC	AXIN2_Ex1_Seq	AGC GCT ATG TTG GTG ACT TG
AXIN2_sgRNA_Ex1_B	AAA CAT CTT CGT TCC GCC TGG TGT C	AXIN2_Ex1_Rev	CAT CAC CGA CTG GAT CTC GG
AXIN1_sgRNA_Ex1_I_A	CAC CGA ACT TGC TCC GAG GTC CAA G	AXIN1_Ex1_For	TGC TTT GAG TTT GAG CGG GA	AXIN1_Ex1_For	TGC TTT GAG TTT GAG CGG GA
AXIN1_sgRNA_Ex1_I_B	AAA CCT TGG ACC TCG GAG CAA GTT C	AXIN1_Ex1_Rev	CTC CGA GCC TGT CCT CGT AT
AXIN1_sgRNA_Ex1_II_A	CAC CGA GGA CTT TCC TGA AGC AGG A	AXIN1_Ex1_For	TGC TTT GAG TTT GAG CGG GA	AXIN1_Ex1_Rev	CTC CGA GCC TGT CCT CGT AT
AXIN1_sgRNA_Ex1_II_B	AAA CTC CTG CTT CAG GAA AGT CCT C	AXIN1_Ex1_Rev	CTC CGA GCC TGT CCT CGT AT
PIGL_sgRNA_Ex3_A	CAC CGA GGG ATT TCC CAG ATG ACC C	PIGL_Ex3_For	TGC ATA TCA TCA TGC CTT GTG C	PIGL_Ex3_For	TGC ATA TCA TCA TGC CTT GTG C
PIGL_sgRNA_Ex3_B	AAA CGG GTC ATC TGG GAA ATC CCT C	PIGL_Ex3_Rev	TGT GAA AAT GCT TGG TAA AAG GTG A
GPC4_sgRNA_Ex3_II_A	CAC CGT TGC GAG GGA CAT CTC CGA A	GPC4_Ex3_For	TGA CTC CTG AGA AGC TGT TGG	GPC4_Ex3_Seq_II	ACA AAA CAG AGA AGA CAA GGA GT
GPC4_sgRNA_Ex3_II_B	AAA CTT CGG AGA TGT CCC TCG CAA C	GPC4_Ex3_Rev	CAA CCA AAT GTG GAG CCT GTG
GPC4_sgRNA_Ex3_III_A	CAC CGA GAG TTG AAA CGT TAC TAC G	GPC4_Ex3_For	TGA CTC CTG AGA AGC TGT TGG	GPC4_Ex3_Seq_II	ACA AAA CAG AGA AGA CAA GGA GT
GPC4_sgRNA_Ex3_III_B	AAA CCG TAG TAA CGT TTC AAC TCT C	GPC4_Ex3_Rev	CAA CCA AAT GTG GAG CCT GTG
GPC6_sgRNA_Ex4I_A	CAC CGA GGC TGA CCT CGA CAC AGA G	GPC6_Ex4_For	ACA GTG TCT AGG CTT TAG GGC	GPC6_Ex4_For	ACA GTG TCT AGG CTT TAG GGC
GPC6_sgRNA_Ex4I_B	AAA CCT CTG TGT CGA GGT CAG CCT C	GPC6_Ex4_Rev	CCA TCC TAG TCT CTA AAA GTC ATC A
LGR4_sgRNA_Ex1_A	CAC CGG AGG CGG CCG CAG CAA TGC	LGR4_Ex1_For	CTT GAA GAG CCG CTG CAT TG	LGR4_Ex1_For	CTT GAA GAG CCG CTG CAT TG
LGR4_sgRNA_Ex1_B	AAA CGC ATT GCT GCG GCC GCC TCC	LGR4_Ex1_Rev	CGA ACC CGG ACT AGC AAA GT
LGR5_sgRNA_Ex16_A	CAC CGA CAC TCC AAA TGC ACA GCA C	LGR5_Ex16_For	TGG AAG TTG CAT CAC TCA GC	LGR5_Ex16_For	TGG AAG TTG CAT CAC TCA GC
LGR5_sgRNA_Ex16_B	AAA CGT GCT GTG CAT TTG GAG TGT C	LGR5_Ex17_Rev	AAG TCC TCC CAC CTC AAT CCT
LGR5_sgRNA_Ex17_A	CAC CGT GAA CAC TGC ACT GAA TGA A	LGR5_Ex16_For	TGG AAG TTG CAT CAC TCA GC	LGR5_Ex17_Rev	AAG TCC TCC CAC CTC AAT CCT
LGR5_sgRNA_Ex17_B	AAA CTT CAT TCA GTG CAG TGT TCA C	LGR5_Ex17_Rev	AAG TCC TCC CAC CTC AAT CCT
LGR6_sgRNA_Ex8_A	CAC CGT CCC AGA AAA GGC CTT CAT G	LGR6_Ex8_For	TCC AGG CCA ATG CCT CTT TT	LGR6_Ex8_For	TCC AGG CCA ATG CCT CTT TT
LGR6_sgRNA_Ex8_B	AAA CCA TGA AGG CCT TTT CTG GGA C	LGR6_Ex8_Rev	CTT TGC AGT GGA CTT GTG CC
APC_sgRNA_Ex5_A	CAC CGG ATC TGT ATC AAG CCG TTC	APC_Ex5_For	TTA CCC TGA CCC AAG TGG AC	APC_Ex5_For	TTA CCC TGA CCC AAG TGG AC
APC_sgRNA_Ex5_B	AAA CGA ACG GCT TGA TAC AGA TCC	APC_Ex5_Rev	CTC TGC TTC CAT TTA CAA ACC C
CSNK1A1_sgRNA_Ex2_A	CAC CGC TTG CTC TCG TAC AGC AAC	CSNK1A1_Ex2_For	AGA ACA GTT TCC GAT CGC CT	CSNK1A1_Ex2_Seq	CGG ATT TCG TCA CTA CCC CC
CSNK1A1_sgRNA_Ex2_B	AAA CGT TGC TGT ACG AGA GCA AGC	CSNK1A1_Ex2_Rev	ATC AGA AGT GCC GCC GTA AA
CSNK1A1_sgRNA_Ex3_A	CAC CGT ACT AGT CAT GGA TCT TCT	CSNK1A1_Ex3_For	AGG CCA TAG GAA TCA GTG GC	CSNK1A1_Ex3_Seq	AAT TCA GCT GCC CTG GTA AC
CSNK1A1_sgRNA_Ex3_B	AAA CAG AAG ATC CAT GAC TAG TAC	CSNK1A1_Ex3_Rev	AGC TTT TCT AAG AGT CCC ACA CA
SERBP1_sgRNA_Ex1_A	CAC CGA GCC GGC GGG GGC GGC GTT	SERBP1_Ex1_For	CGC TCC CAT GTG ATA GTT TCA	SERBP1_Ex1_Seq	GGA TGG CTC CGA GAA CCT C
SERBP1_sgRNA_Ex1_B	AAA CAA CGC CGC CCC CGC CGG CTC	SERBP1_Ex1_Rev	CCC CAA CCT GCA GCT TAC T
HUWE1_sgRNA_Ex1_A	CAC CGA CTG AAG AAG ACA CCT ACT G	HUWE1_Ex1_For	GGG ATG TGG GCC AGT TTG AT	HUWE1_Ex1_For	GGG ATG TGG GCC AGT TTG AT
HUWE1_sgRNA_Ex1_B	AAA CCA GTA GGT GTC TTC TTC AGT C	HUWE1_Ex1_Rev	TTT GCA GCT GTG GAA ACC AG
HUWE1_sgRNA_Ex2_A	CAC CGT AAT GAT GAG CAA CTT CTC T	HUWE1_Ex2_For	CCA GGT GGA TTG TTG GGG GA	HUWE1_Ex2_For	CCA GGT GGA TTG TTG GGG GA
HUWE1_sgRNA_Ex2_B	AAA CAG AGA AGT TGC TCA TCA TTA C	HUWE1_Ex2_Rev	ATG GAG AAC TCC GGT TAC ATT CT
