# Supplementary figures and images for: Comparative genetic screens in human cells reveal new regulatory mechanisms in WNT signaling
Source: eLife journal article supplement (doi:10.7554/elife.21459), 2016-12-20

Figure 3--figure supplement 1

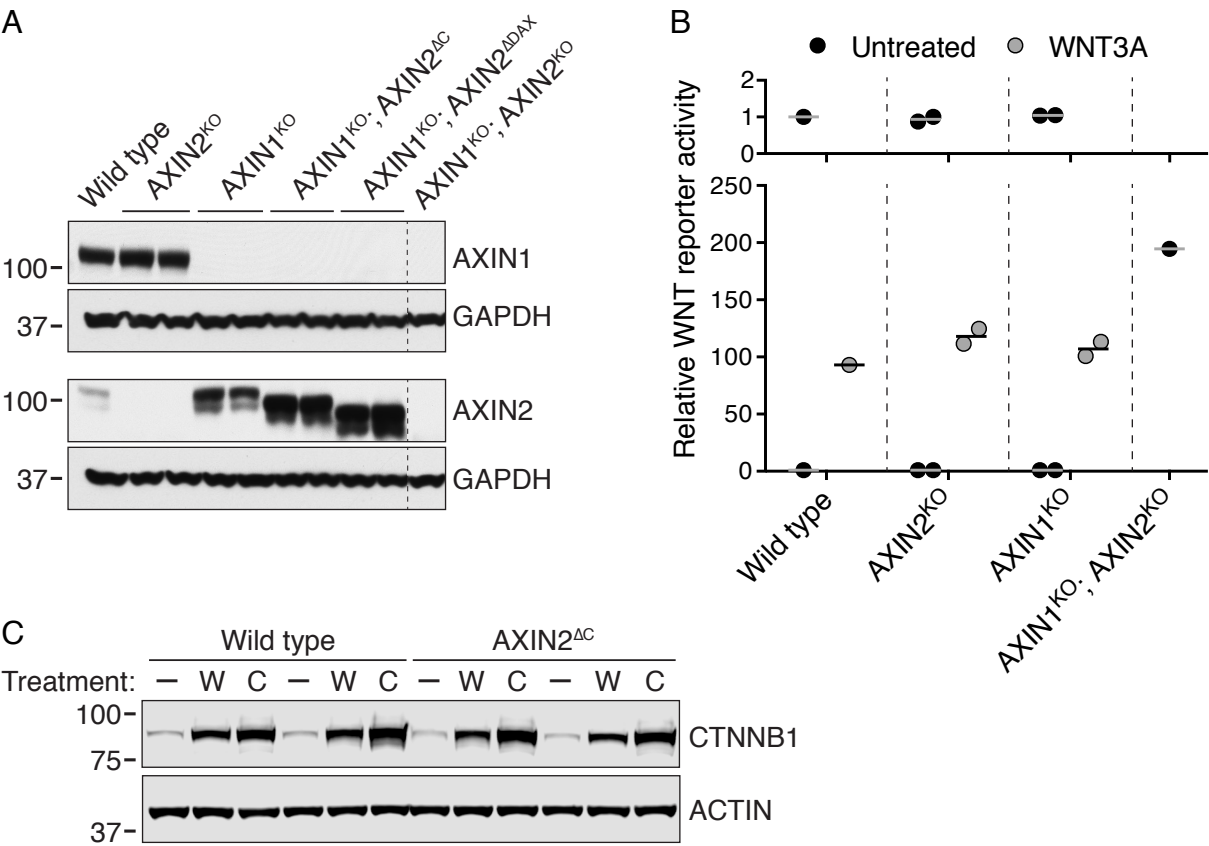

Supplement: supp [file elife-21459-supp-v2.zip]

Figure 6--figure supplement 1

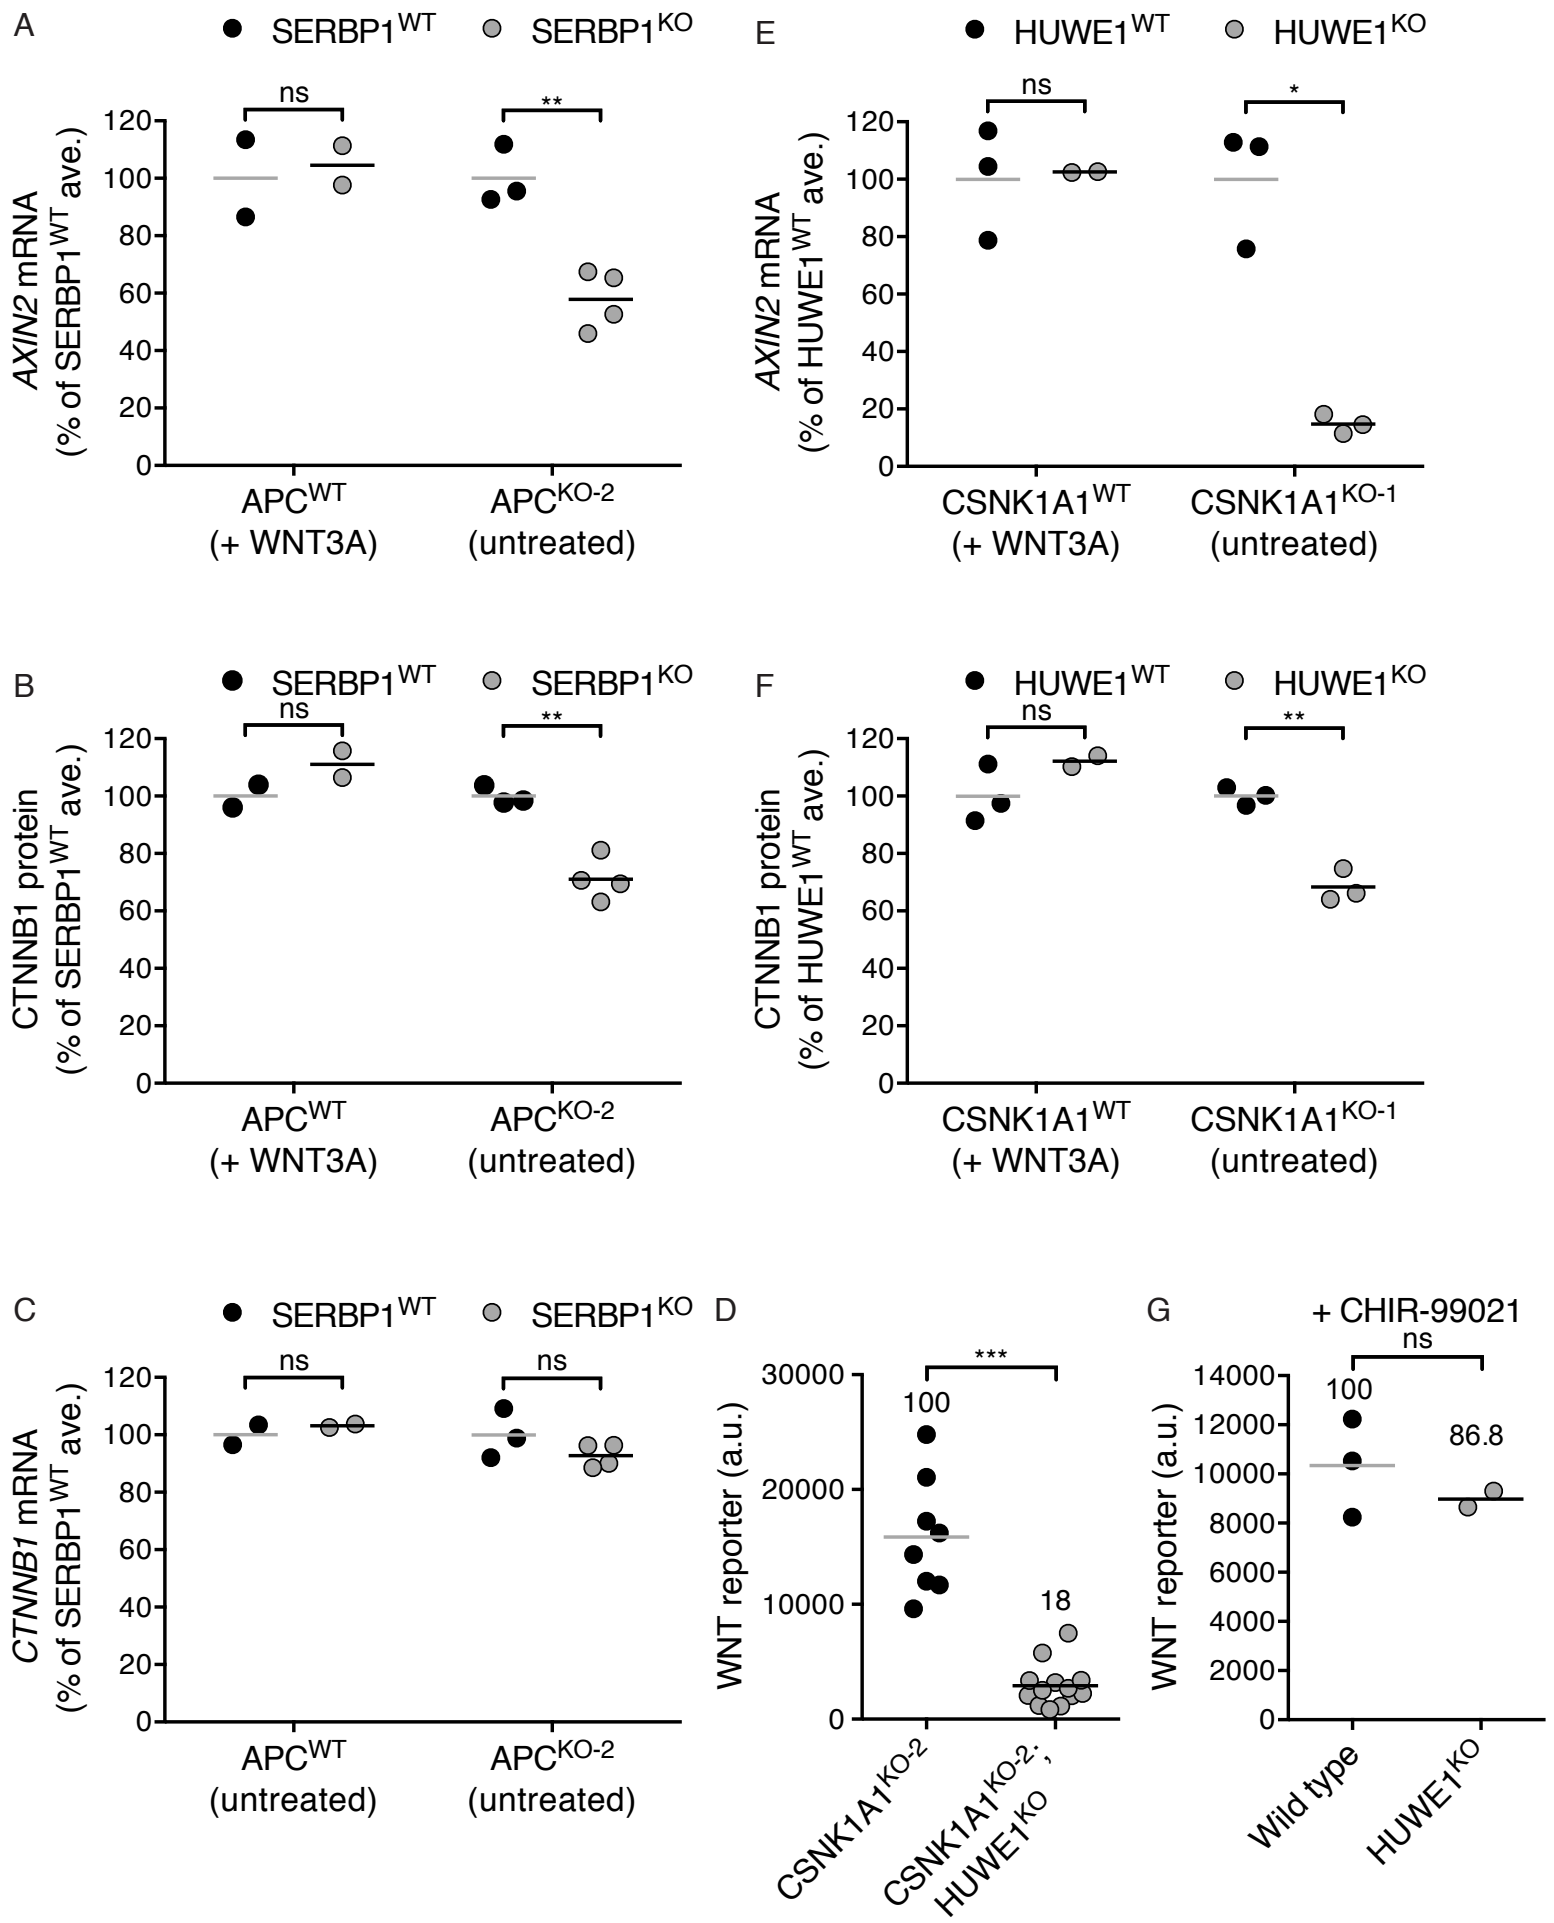

Supplement: supp [file elife-21459-supp-v2.zip]

Figure 3--figure supplement 2

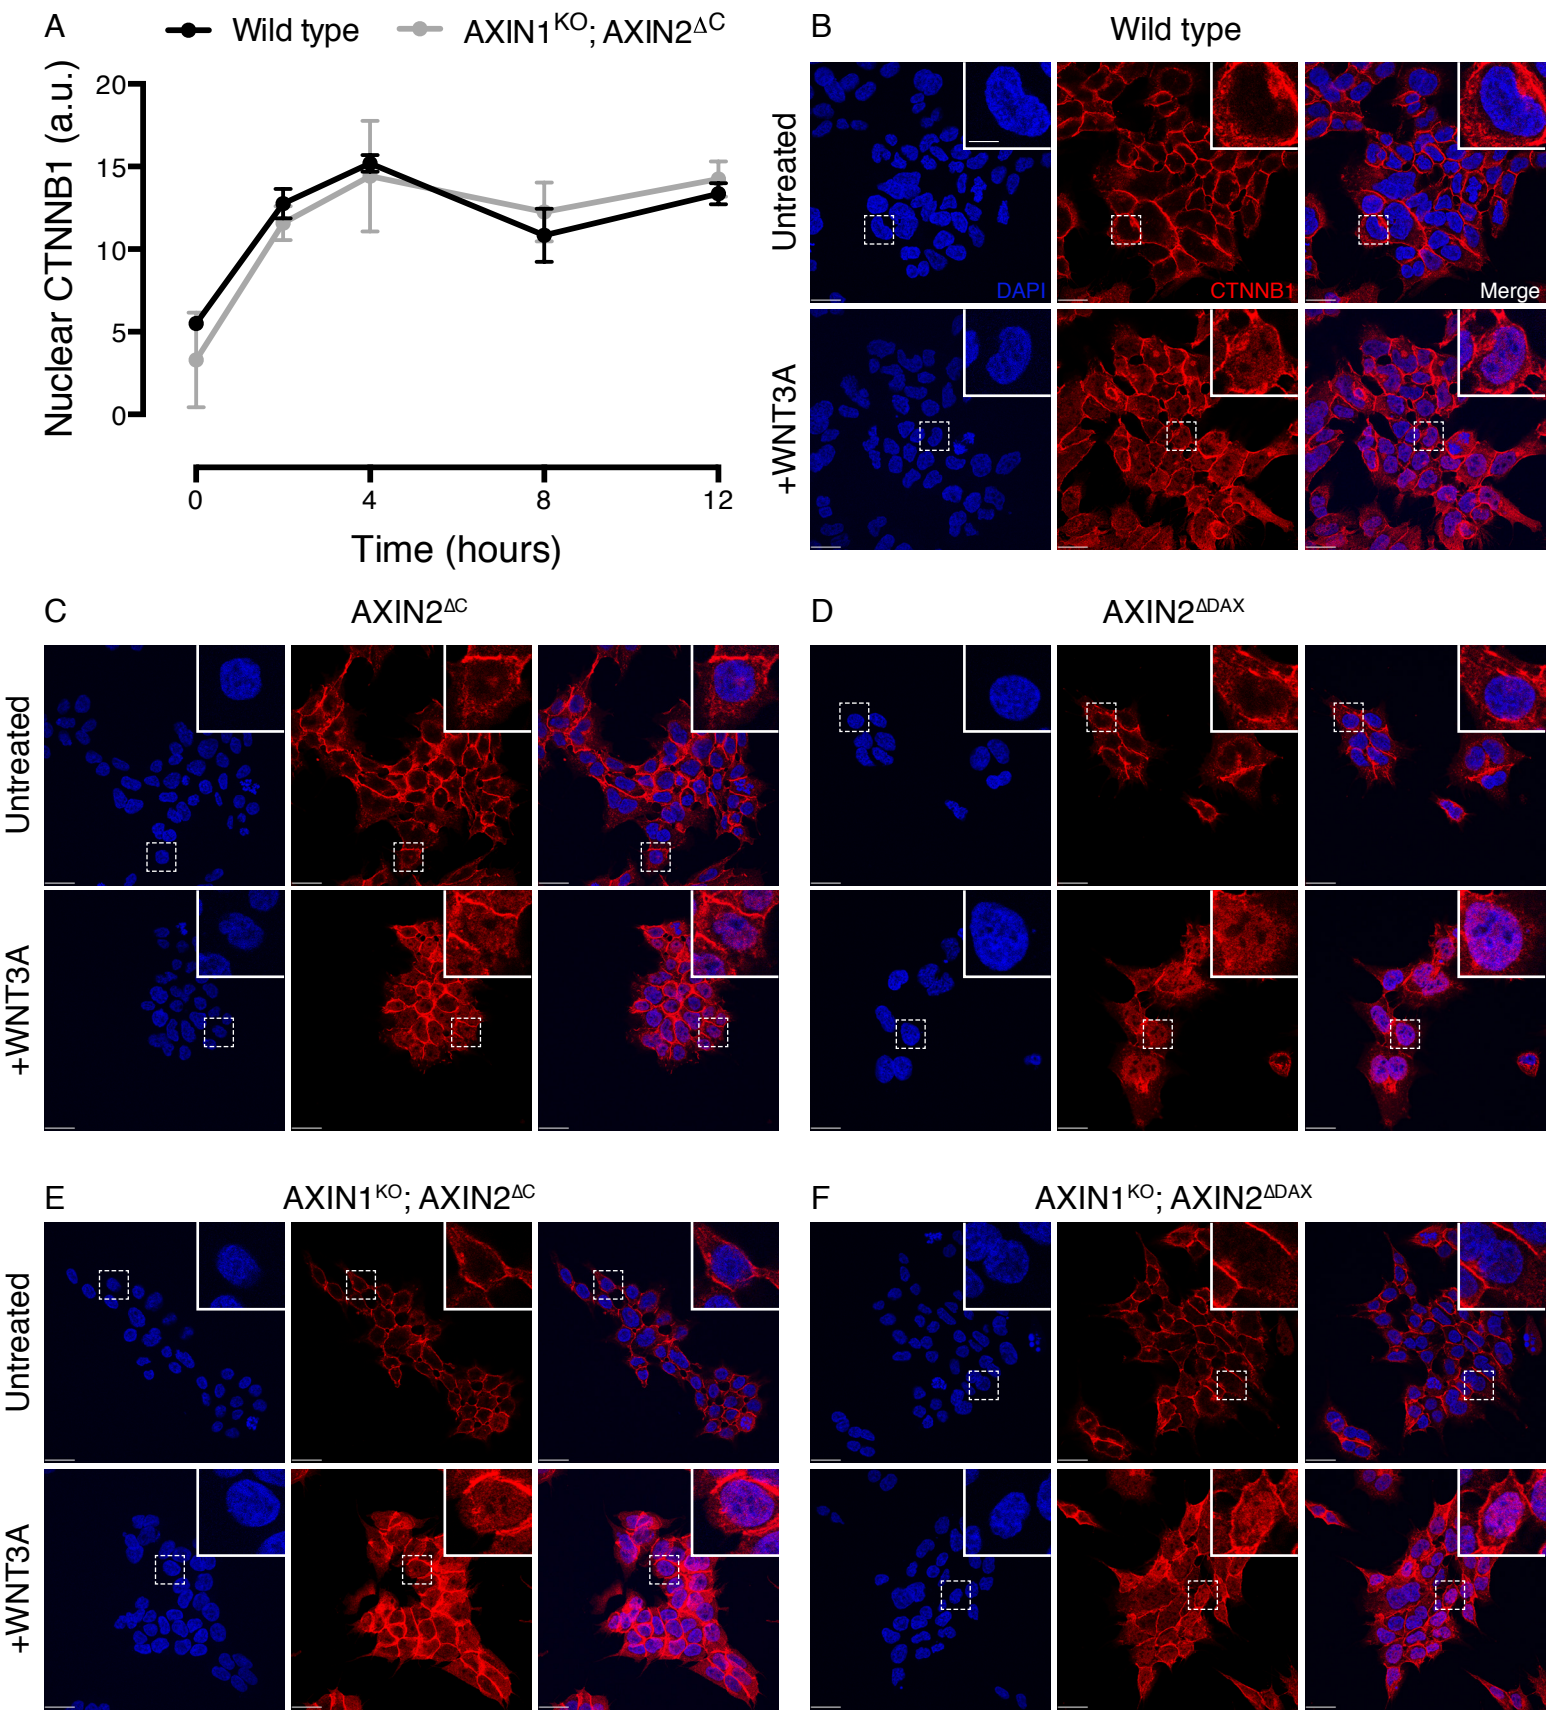

Supplement: supp [file elife-21459-supp-v2.zip]

Figure 4--figure supplement 1

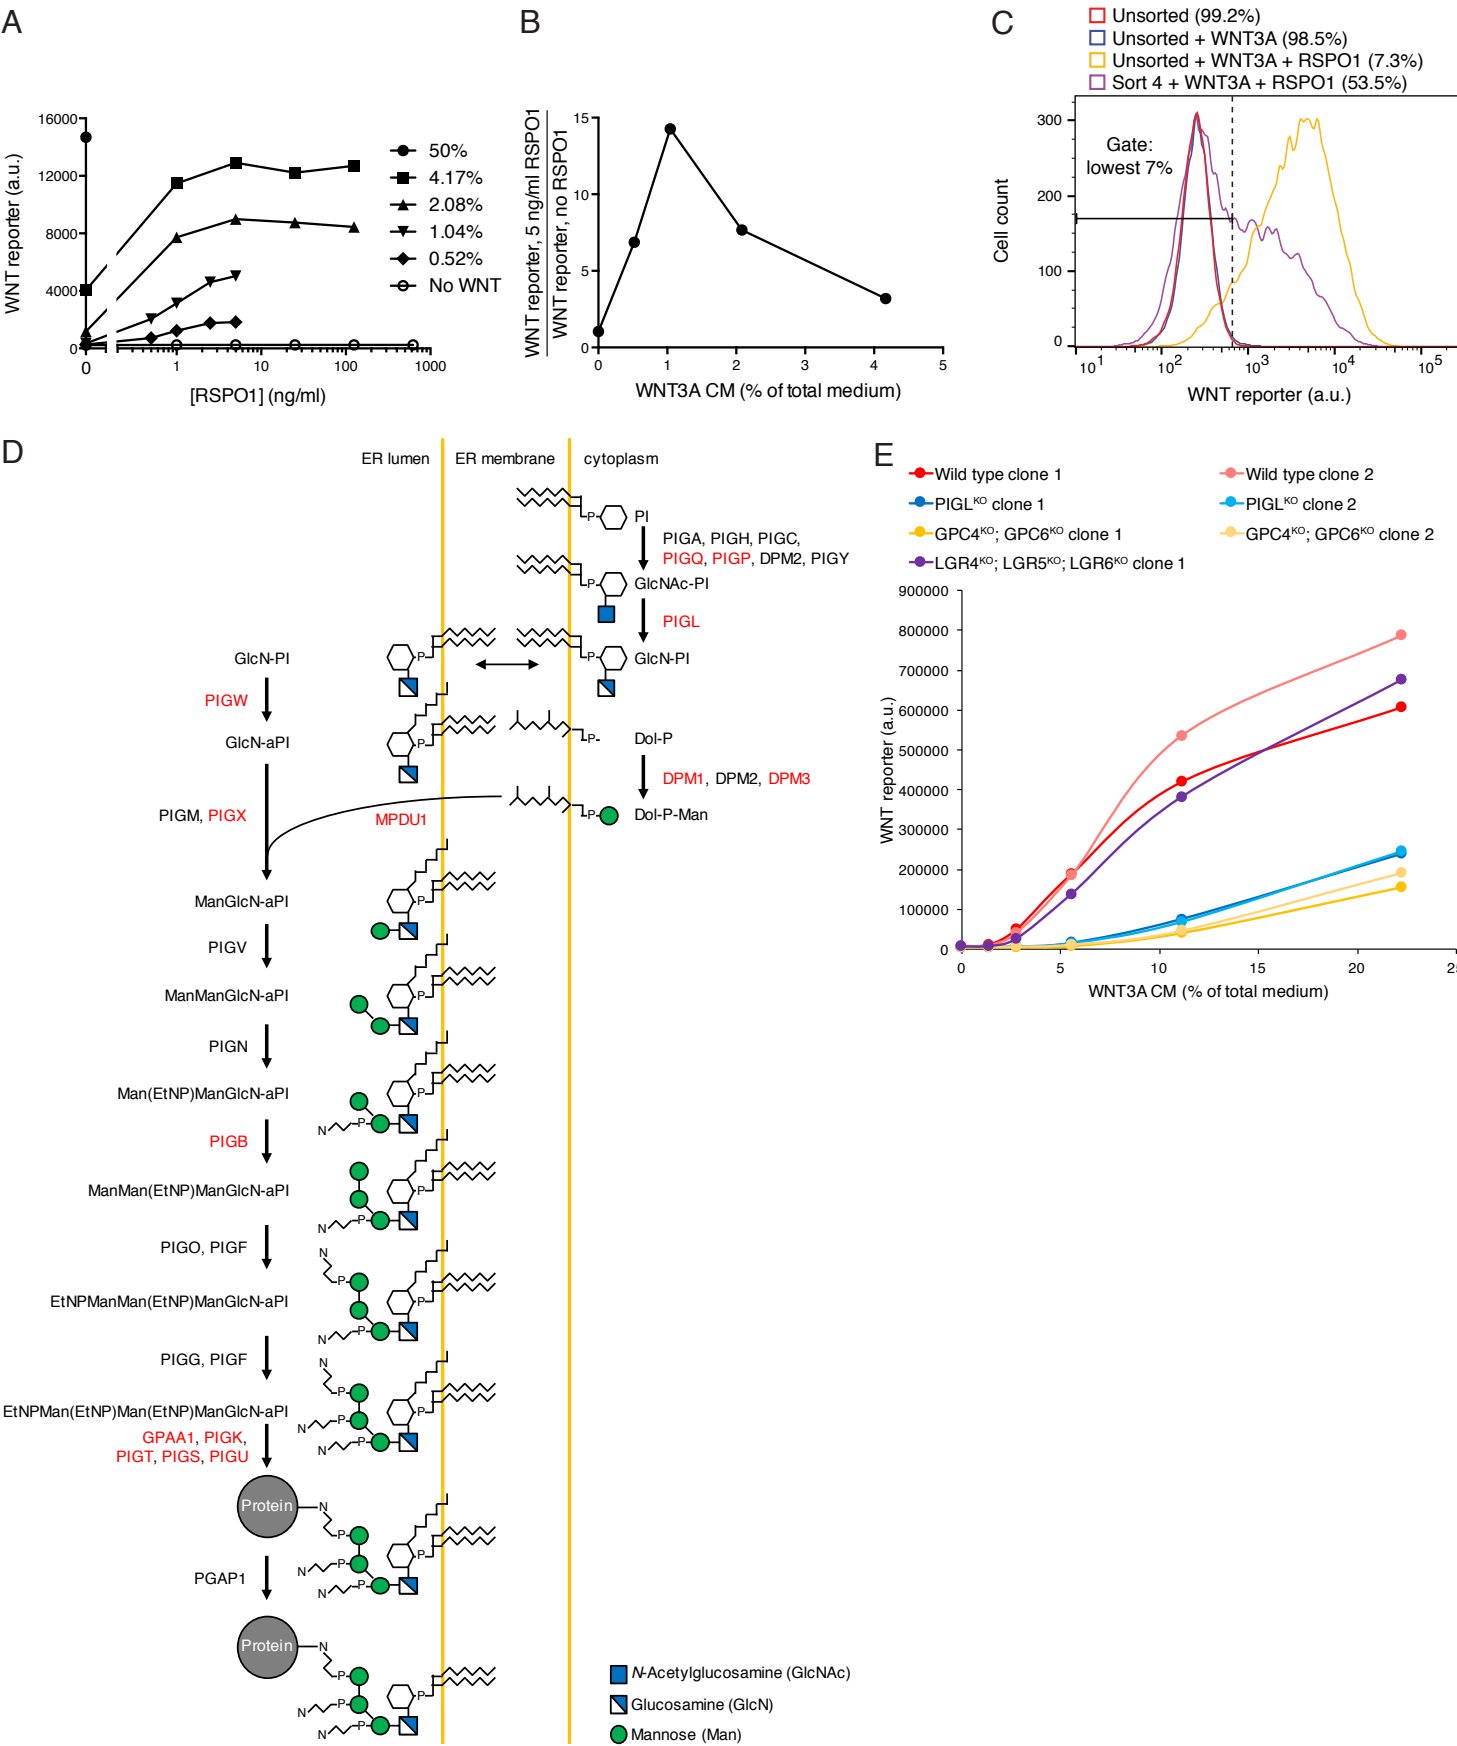

Supplement: supp [file elife-21459-supp-v2.zip]

Figure 5--figure supplement 1

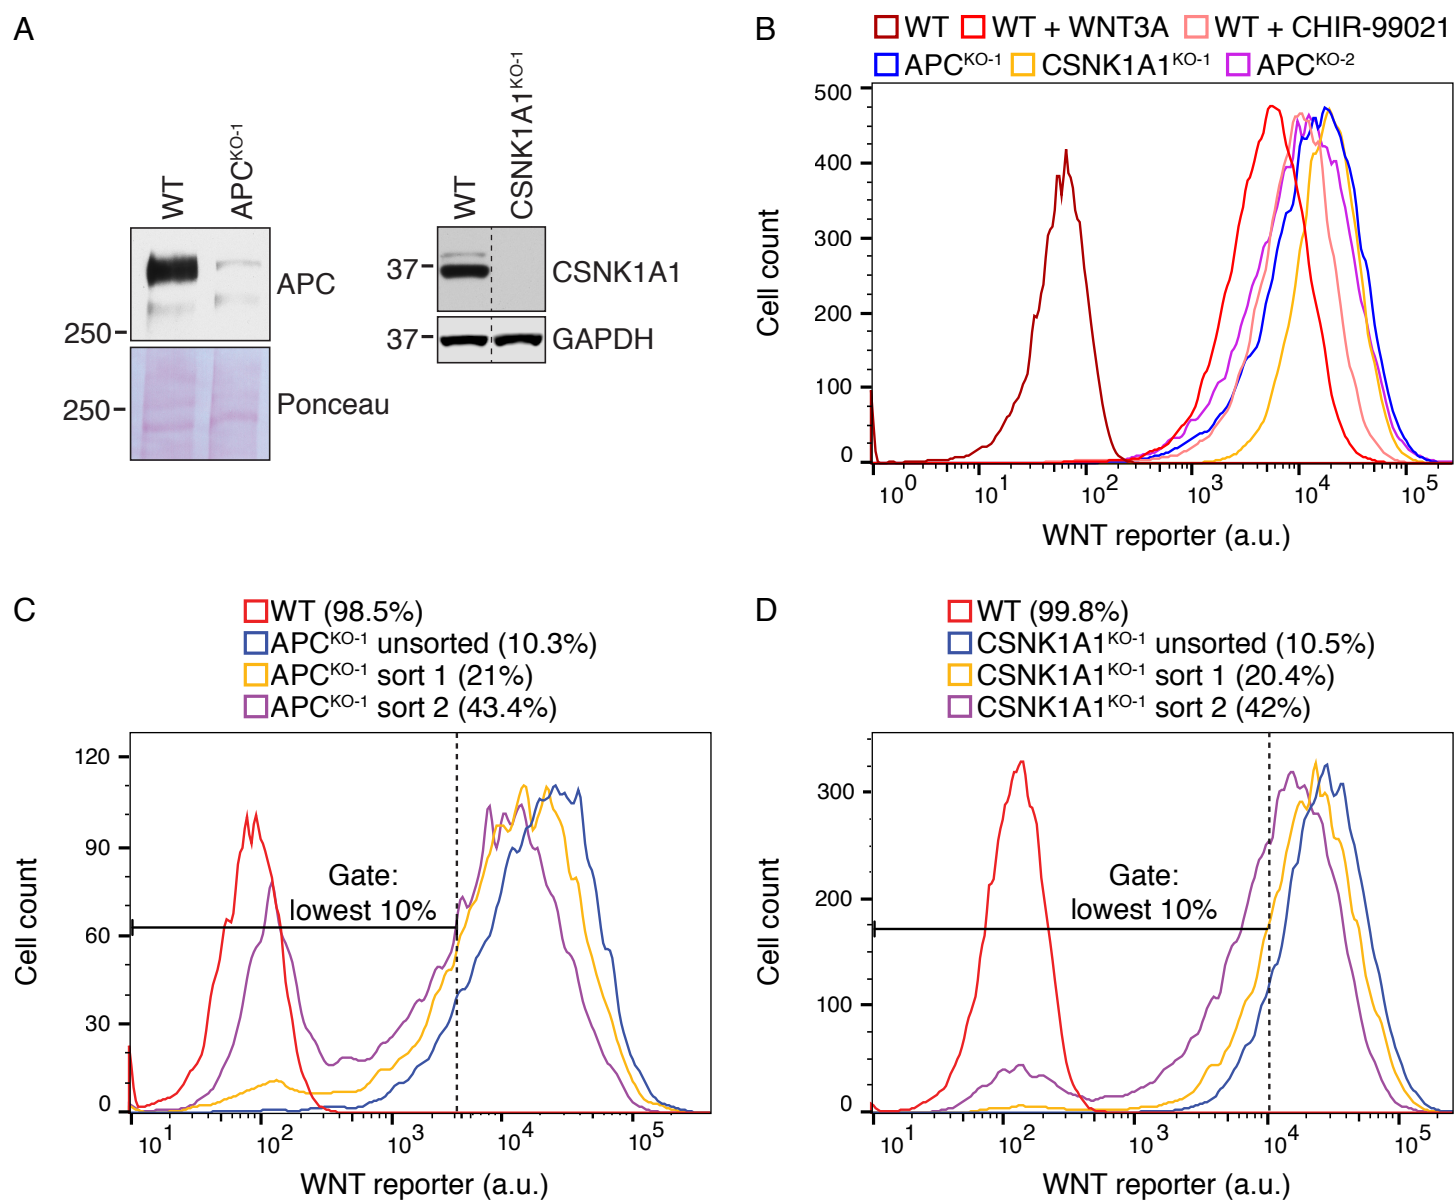

Supplement: supp [file elife-21459-supp-v2.zip]

Figure 1--figure supplement 1

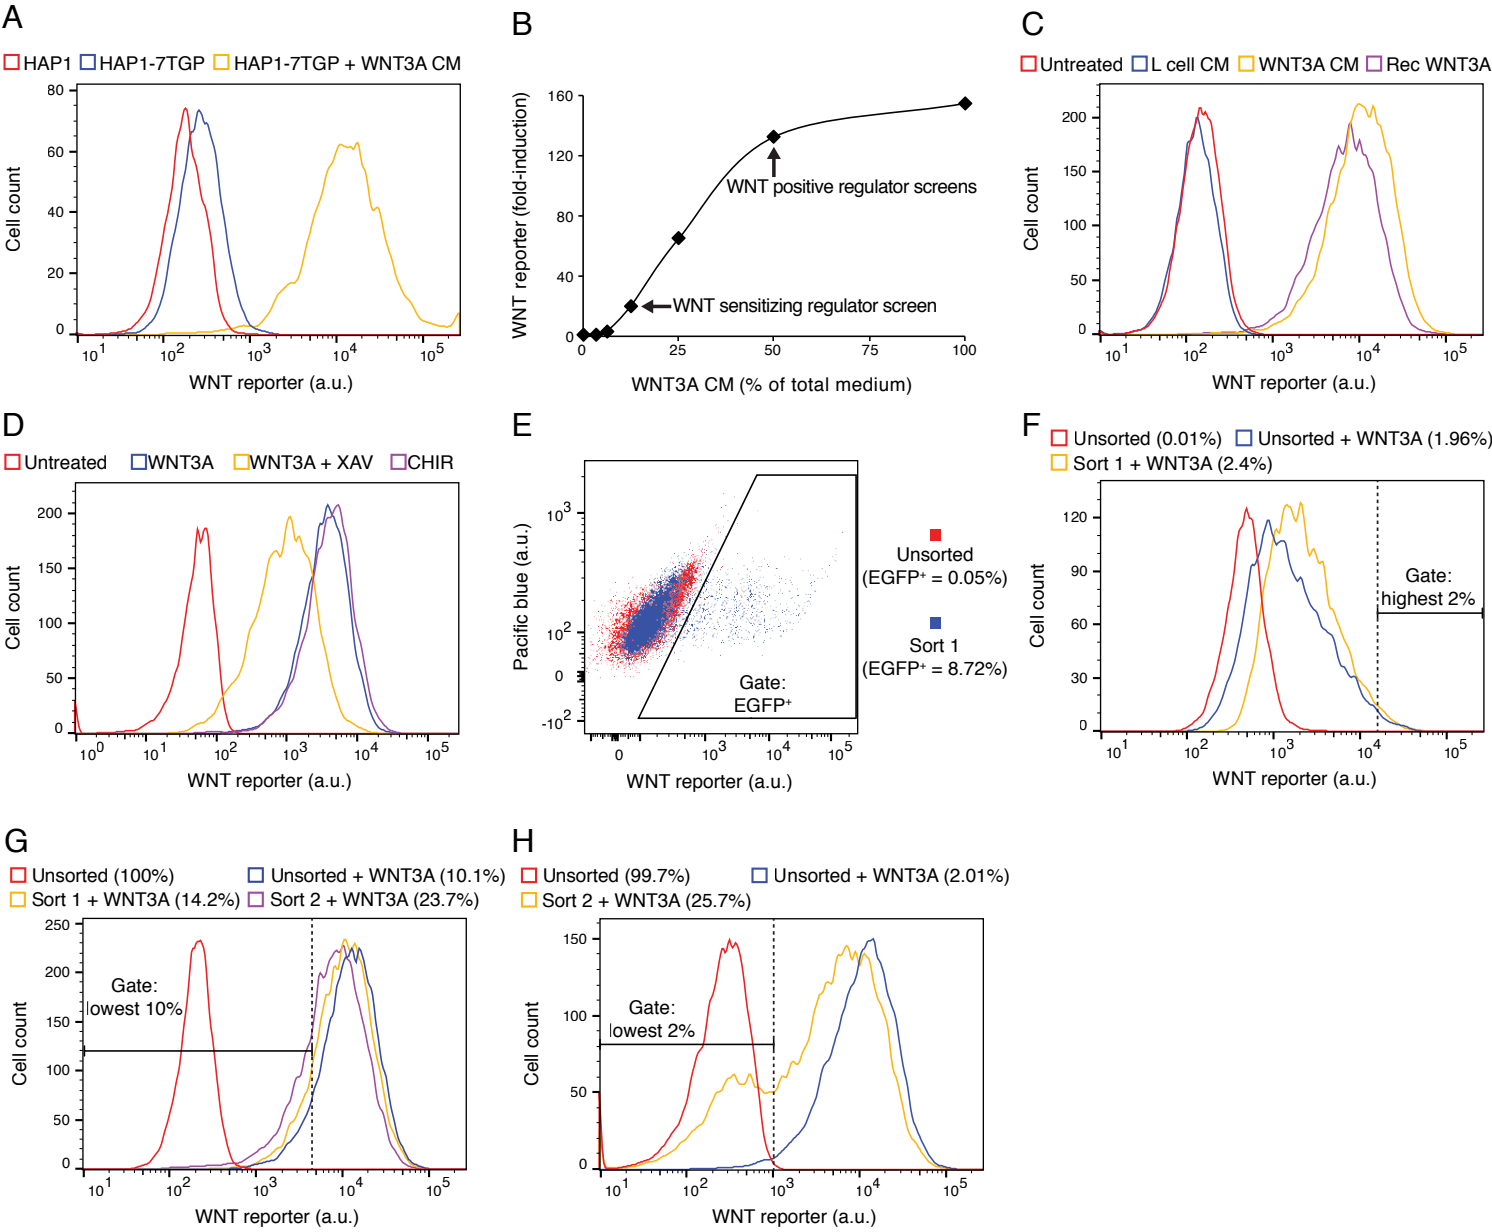

Supplement: supp [file elife-21459-supp-v2.zip]

Figure 3--figure supplement 3

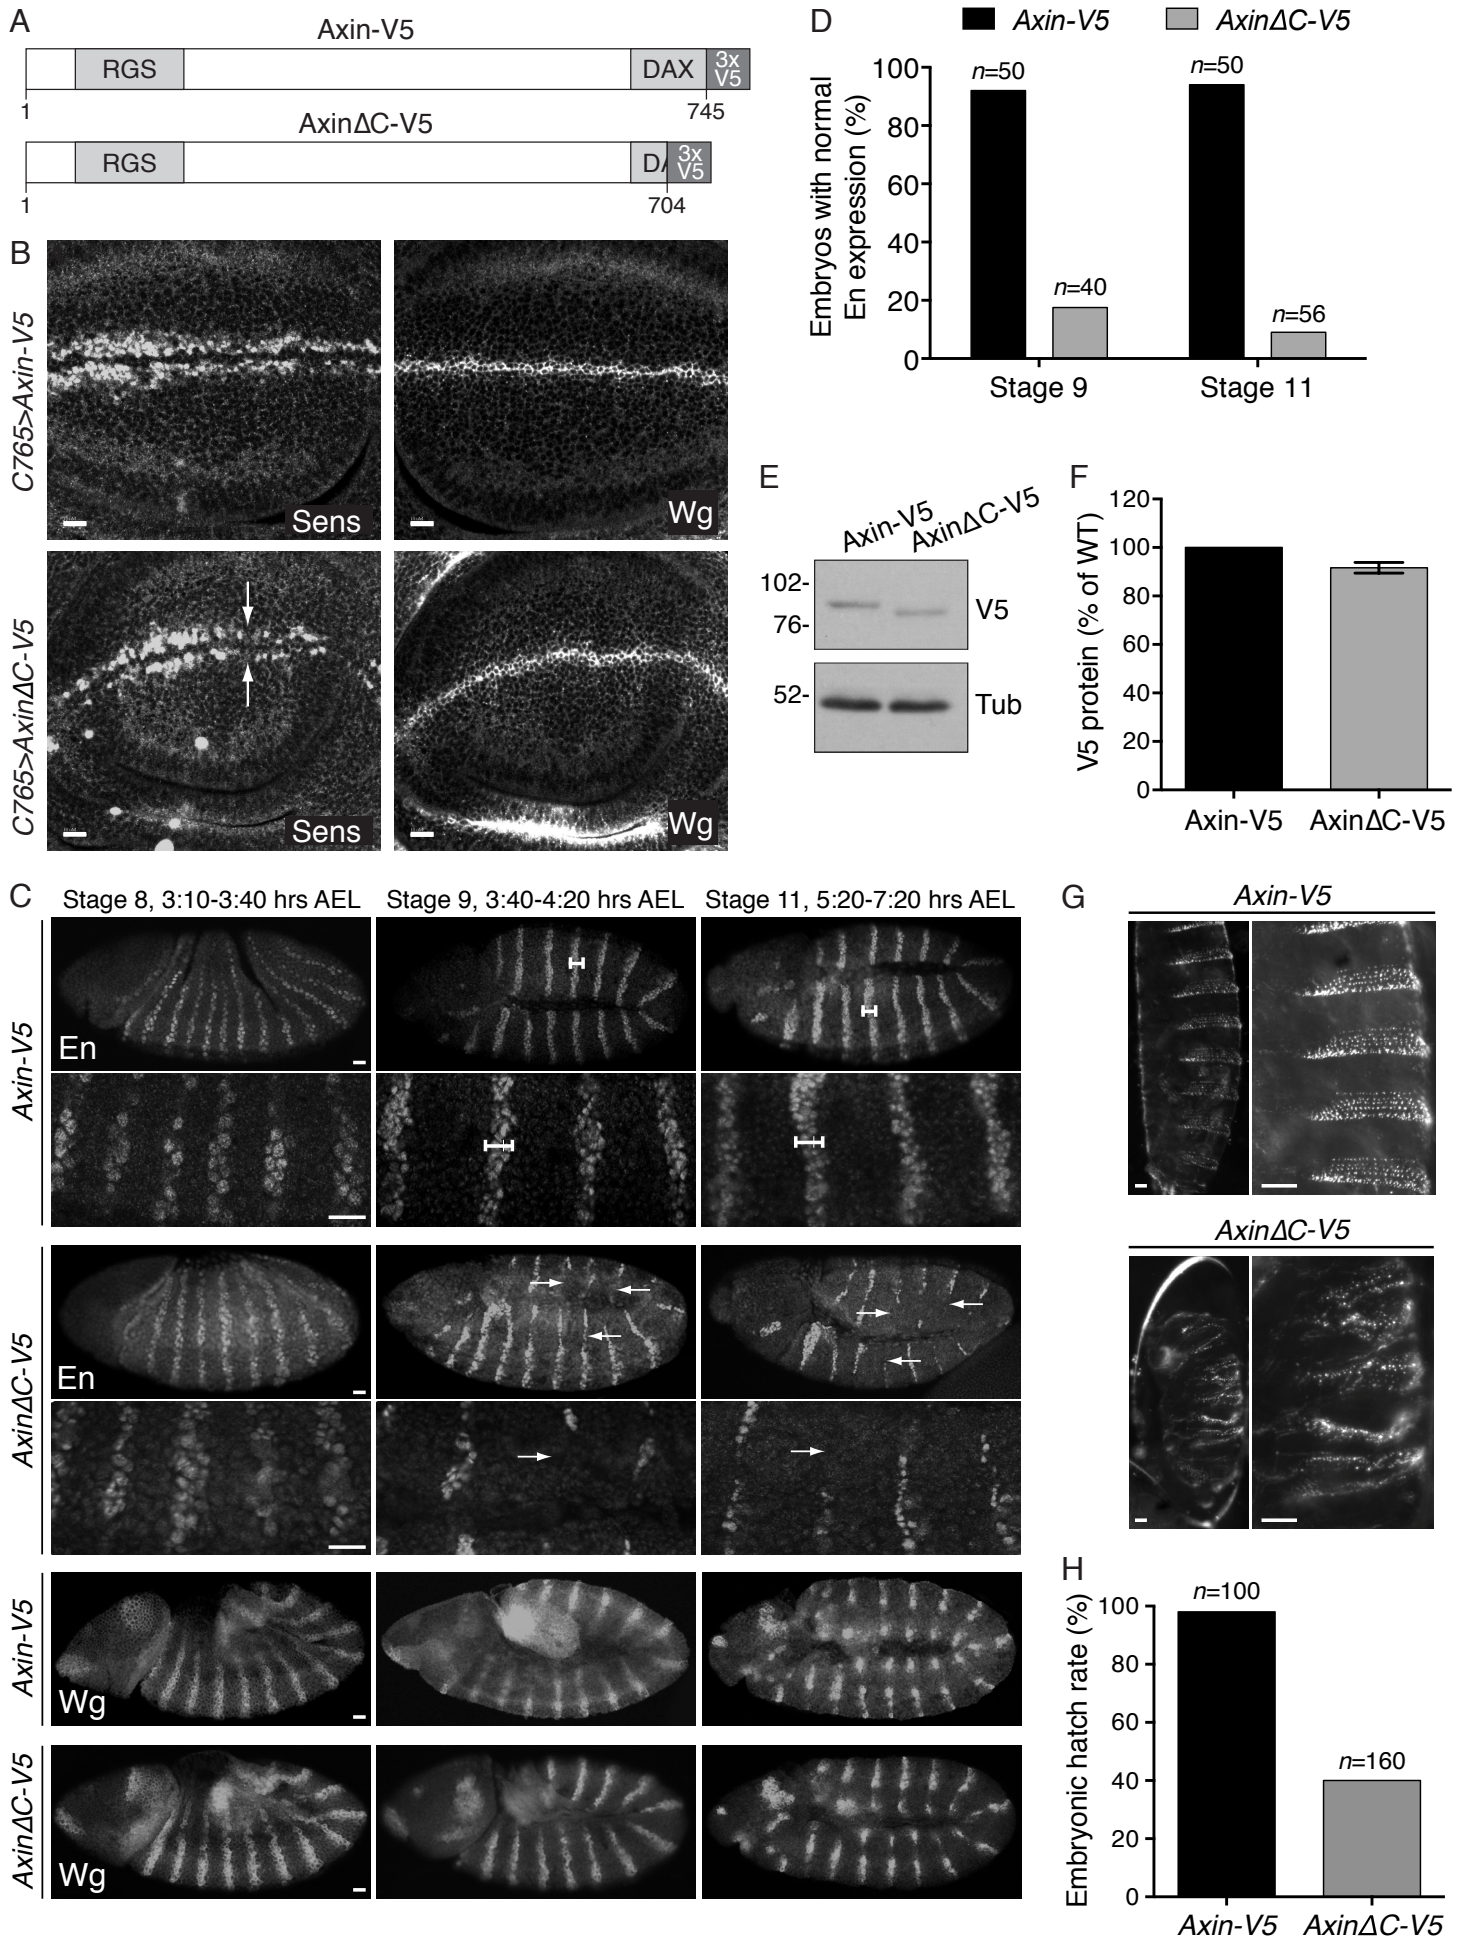

Supplement: supp [file elife-21459-supp-v2.zip]
